# Supplementary material for: Thirty biologically interpretable clusters of transcription factors distinguish cancer type
Source: BMC Genomics. 2018 Oct 11;19:738. doi: 10.1186/s12864-018-5093-z (PMC6180590; doi:10.1186/s12864-018-5093-z)
Supplement: Supplementary file 2 — Assignments of transcription factors to biological components. (XLSX 35.2 kb) [file 12864_2018_5093_MOESM2_ESM.xlsx]

## Sheet: tfClust
GeneSymbol	Hs.ENTREZID	Hs.MAP	Function	Taxa	Cluster
CEBPZ	10153	2p22.2	DNA Binding	Transcription Factor Binding: tf co-factor binding	1
GMEB1	10691	1p35.3	DNA Binding	Transcription Factor Binding: tf co-factor binding; DNA-Binding: sequence-specific	1
KDM5B	10765	1q32.1	TF PPI; Transactivation	Transcription Factor Binding: tf co-factor binding	1
NCOA3	8202	20q13.12	Co-activation	Transcription Factor Binding: tf co-factor binding	1
NFYA	4800	6p21.1	DNA Binding; Transactivation	DNA-Binding: sequence-specific	1
NR6A1	2649	9q33.3	DNA Binding; Transactivation	DNA-Binding: sequence-specific	1
POLR2B	5431	4q12	DNA Binding; Non-specific DNA; TF PPI	DNA-Binding: non-sequence-specific; Basal Transcription Factor; Transcription Factor Binding: tf co-factor binding	1
SKIL	6498	3q26.2	DNA Binding; Transactivation	Transcription Factor Binding: tf co-factor binding	1
TAF1A	9015	1q41	DNA Binding; TF PPI	Basal Transcription Factor	1
TAF2	6873	8q24.12	TF PPI	Basal Transcription Factor	1
TCF20	6942	22q13.3	DNA Binding; Transactivation	DNA-Binding: sequence-specific	1
TDG	6996	12q23.3	TF PPI	Transcription Factor Binding: tf co-factor binding	1
TFAM	7019	10q21.1	DNA Binding; Transactivation	DNA-Binding: sequence-specific	1
TFDP1	7027	13q34	DNA Binding	DNA-Binding: sequence-specific	1
UBP1	7342	3p22.3	Co-activation	Transcription Factor Binding: tf co-factor binding	1
YY1	7528	14q32.2	DNA Binding	DNA-Binding: sequence-specific	1
ZBTB33	10009	Xq24	DNA Binding; Transactivation	DNA-Binding: sequence-specific	1
ATF5	22809	19q13.33	DNA Binding	DNA-Binding: sequence-specific	2
CEBPA	1050	19q13.11	Transactivation	DNA-Binding: sequence-specific	2
CREB3L3	84699	19p13.3	DNA Binding; Transactivation	DNA-Binding: sequence-specific	2
ESRRA	2101	11q13.1	DNA Binding; Transactivation	DNA-Binding: sequence-specific	2
GATA4	2626	8p23.1	DNA Binding; Transactivation	DNA-Binding: sequence-specific	2
HNF1A	6927	12q24.31	DNA Binding	DNA-Binding: sequence-specific	2
NR1H3	10062	11p11.2	DNA Binding; Transactivation	DNA-Binding: sequence-specific	2
NR1H4	9971	12q23.1	Co-activation	DNA-Binding: sequence-specific; Transcription Factor Binding: tf co-factor binding	2
NR1I2	8856	3q13.33	DNA Binding	DNA-Binding: sequence-specific	2
NR1I3	9970	1q23.3	DNA Binding	DNA-Binding: sequence-specific	2
NR2F6	2063	19p13.11	DNA Binding	DNA-Binding: sequence-specific	2
NR5A2	2494	1q32.1	DNA Binding; Transactivation	DNA-Binding: sequence-specific	2
PCBD1	5092	10q22.1	TF PPI	Transcription Factor Binding: tf co-factor binding	2
PPARA	5465	22q13.31	DNA Binding	DNA-Binding: sequence-specific	2
PREB	10113	2p23.3	DNA Binding; Transactivation	DNA-Binding: sequence-specific	2
TLE1	7088	9q21.32	TF PPI	Transcription Factor Binding: tf co-factor binding	2
TLX1	3195	10q24.31	DNA Binding; Transactivation	DNA-Binding: sequence-specific	2
ZFPM1	161882	16q24.2	Other	Transcription Factor Binding: tf co-factor binding	2
CREB3	10488	9p13.3	DNA Binding	Transcription Factor Binding: tf co-factor binding; DNA-Binding: sequence-specific	3
CREM	1390	10p11.21	DNA Binding; Transactivation	DNA-Binding: sequence-specific	3
MSX1	4487	4p16.2	DNA Binding	DNA-Binding: sequence-specific	3
NFATC4	4776	14q12	DNA Binding; Transactivation	DNA-Binding: sequence-specific	3
NR2F2	7026	15q26.2	DNA Binding; Transactivation	DNA-Binding: sequence-specific	3
PBX1	5087	1q23.3	DNA Binding	DNA-Binding: sequence-specific	3
SOX17	64321	8q11.23	DNA Binding; Transactivation	DNA-Binding: sequence-specific	3
SOX18	54345	20q13.33	DNA Binding	DNA-Binding: sequence-specific	3
TLE6	79816	19p13.3	TF PPI	Transcription Factor Binding: tf co-factor binding	3
ASCL1	429	12q23.2	DNA Binding; TF PPI; Transactivation	DNA-Binding: sequence-specific; Transcription Factor Binding: tf co-factor binding	4
GSX1	219409	13q12.2	DNA Binding; Transactivation	DNA-Binding: sequence-specific	4
MYT1	4661	20q13.33	DNA Binding; Transactivation	DNA-Binding: sequence-specific	4
MYT1L	23040	2p25.3	DNA Binding; Transactivation	DNA-Binding: sequence-specific	4
NEUROD1	4760	2q31.3	DNA Binding; Transactivation	DNA-Binding: sequence-specific	4
NEUROD6	63974	7p14.3	DNA Binding	DNA-Binding: sequence-specific	4
OLIG2	10215	21q22.11	TF PPI	DNA-Binding: sequence-specific; Transcription Factor Binding: tf co-factor binding	4
POU3F4	5456	Xq21.1	Other	DNA-Binding: sequence-specific	4
SOX1	6656	13q34	DNA Binding	DNA-Binding: sequence-specific	4
SOX3	6658	Xq27.1	DNA Binding	DNA-Binding: sequence-specific	4
TBR1	10716	2q24.2	DNA Binding	Transcription Factor Binding: tf co-factor binding; DNA-Binding: sequence-specific	4
CDKN2A	1029	9p21.3	DNA Binding	Transcription Factor Binding: tf co-factor binding	5
DAXX	1616	6p21.32	Co-activation	Transcription Factor Binding: tf co-factor binding	5
GTF2H4	2968	6p21.33	TF PPI	Basal Transcription Factor	5
HMGB2	3148	4q34.1	Co-activation	DNA-Binding: non-sequence-specific; Transcription Factor Binding: tf co-factor binding	5
IRF3	3661	19q13.33	DNA Binding; Transactivation	DNA-Binding: sequence-specific	5
ITGB3BP	23421	1p31.3	TF PPI	Transcription Factor Binding: tf co-factor binding	5
TAF11	6882	6p21.31	Co-activation; TF PPI	Basal Transcription Factor; Transcription Factor Binding: tf co-factor binding	5
TAF12	6883	1p35.3	Co-activation	Basal Transcription Factor; Transcription Factor Binding: tf co-factor binding	5
USF1	7391	1q23.3	DNA Binding; Transactivation	DNA-Binding: sequence-specific	5
FOXK1	221937	7p22.1	DNA Binding; Transactivation	DNA-Binding: sequence-specific	6
HDAC4	9759	2q37.3	Co-activation	Transcription Factor Binding: tf co-factor binding	6
KLF13	51621	15q13.3	DNA Binding; Transactivation	DNA-Binding: sequence-specific	6
MAFG	4097	17q25.3	DNA Binding; Transactivation	DNA-Binding: sequence-specific	6
MNT	4335	17p13.3	DNA Binding; TF PPI	DNA-Binding: sequence-specific	6
ARID3A	1820	19p13.3	DNA Binding; Transactivation	DNA-Binding: sequence-specific	7
CNOT3	4849	19q13.42	DNA Binding	Transcription Factor Binding: tf co-factor binding	7
E2F1	1869	20q11.22	DNA Binding	DNA-Binding: sequence-specific	7
E2F2	1870	1p36.12	DNA Binding	DNA-Binding: sequence-specific	7
E2F4	1874	16q22.1	DNA Binding; Transactivation	DNA-Binding: sequence-specific; Transcription Factor Binding: tf co-factor binding	7
E2F7	144455	12q21.2	DNA Binding	DNA-Binding: sequence-specific	7
ELK1	2002	Xp11.23	DNA Binding	DNA-Binding: sequence-specific	7
ETV4	2118	17q21.31	DNA Binding	DNA-Binding: sequence-specific; Transcription Factor Binding: tf co-factor binding	7
EZH2	2146	7q36.1	Non-specific DNA; TF PPI	Transcription Factor Binding: tf co-factor binding; DNA-Binding: non-sequence-specific	7
FOXM1	2305	12p13.33	DNA Binding; Transactivation	Transcription Regulatory Activity: heterochromatin interaction/binding; DNA-Binding: sequence-specific	7
GMEB2	26205	20q13.33	Transactivation	DNA-Binding: sequence-specific; Transcription Factor Binding: tf co-factor binding	7
HCFC1	3054	Xq28	Co-activation	Transcription Factor Binding: tf co-factor binding	7
HNRNPAB	3182	5q35.3	DNA Binding; Transactivation	Single stranded RNA/DNA binding	7
HSF1	3297	8q24.3	DNA Binding	DNA-Binding: sequence-specific	7
KLF16	83855	19p13.3	DNA Binding; Transactivation	DNA-Binding: sequence-specific	7
MAZ	4150	16p11.2	DNA Binding; Transactivation	DNA-Binding: sequence-specific	7
MTA2	9219	11q12.3	Other	Transcription Regulatory Activity: heterochromatin interaction/binding	7
PIAS4	51588	19p13.3	TF PPI	Transcription Factor Binding: tf co-factor binding	7
SALL4	57167	20q13.2	Co-activation	Transcription Regulatory Activity: heterochromatin interaction/binding; DNA-Binding: non-sequence-specific; Transcription Factor Binding: tf co-factor binding	7
SSRP1	6749	11q12.1	TF PPI; Transactivation	Transcription Factor Binding: tf co-factor binding	7
TCF3	6929	19p13.3	DNA Binding; Transactivation	DNA-Binding: sequence-specific	7
TRIM28	10155	19q13.43	TF PPI	Transcription Factor Binding: tf co-factor binding	7
YBX1	4904	1p34.2	DNA Binding	Transcription Factor Binding: tf co-factor binding	7
BACH2	60468	6q15	DNA Binding; Transactivation	DNA-Binding: sequence-specific	8
ETS1	2113	11q24.3	DNA Binding; Transactivation	DNA-Binding: non-sequence-specific	8
FLI1	2313	11q24.3	Transactivation	DNA-Binding: sequence-specific	8
KLF12	11278	13q22.1	DNA Binding; Other	DNA-Binding: sequence-specific	8
MEF2A	4205	15q26.3	DNA Binding; Transactivation	DNA-Binding: sequence-specific	8
NR3C1	2908	5q31.3	DNA Binding	DNA-Binding: sequence-specific	8
RORA	6095	15q22.2	DNA Binding	DNA-Binding: sequence-specific	8
RUNX1T1	862	8q21.3	TF PPI	Transcription Factor Binding: tf co-factor binding	8
STAT5B	6777	17q21.2	DNA Binding	DNA-Binding: sequence-specific	8
TAL1	6886	1p33	Transactivation	DNA-Binding: sequence-specific	8
TCF4	6925	18q21.2	DNA Binding; TF PPI; Transactivation	DNA-Binding: sequence-specific	8
ZEB1	6935	10p11.22	DNA Binding; Transactivation	DNA-Binding: sequence-specific	8
ZEB2	9839	2q22.3	DNA Binding; Transactivation	DNA-Binding: sequence-specific	8
EGR4	1961	2p13.2	DNA Binding	DNA-Binding: sequence-specific	9
FEV	54738	2q35	DNA Binding; Transactivation	DNA-Binding: sequence-specific	9
HAND1	9421	5q33.2	DNA Binding	DNA-Binding: sequence-specific	9
HAND2	9464	4q34.1	TF PPI; Transactivation	Transcription Factor Binding: tf co-factor binding; DNA-Binding: sequence-specific	9
NPAS4	266743	11q13.2	DNA Binding	DNA-Binding: sequence-specific	9
PHOX2A	401	11q13.4	DNA Binding; Transactivation	DNA-Binding: sequence-specific	9
PHOX2B	8929	4p13	DNA Binding	DNA-Binding: sequence-specific	9
PTF1A	256297	10p12.2	DNA Binding	DNA-Binding: sequence-specific	9
TBX20	57057	7p14.2	DNA Binding; Transactivation	DNA-Binding: sequence-specific	9
ASCC1	51008	10q22.1	Co-activation	Transcription Factor Binding: tf co-factor binding	10
BRD7	29117	16q12.1	Co-activation	Transcription Regulatory Activity: heterochromatin interaction/binding	10
COPS2	9318	15q21.1	TF PPI	Transcription Factor Binding: tf co-factor binding	10
DDX5	1655	17q23.3	Co-activation; TF PPI	Transcription Factor Binding: tf co-factor binding	10
DMTF1	9988	7q21.12	DNA Binding	DNA-Binding: sequence-specific	10
GABPA	2551	21q21.3	DNA Binding; Transactivation	DNA-Binding: sequence-specific	10
GATAD2B	57459	1q21.3	Co-activation	Transcription Regulatory Activity: heterochromatin interaction/binding	10
GTF2H1	2965	11p15.1	TF PPI	Basal Transcription Factor	10
GTF2H2	2966	5q13.2	TF PPI	Transcription Factor Binding: tf co-factor binding; Basal Transcription Factor	10
LEF1	51176	4q25	Co-activation	DNA-Binding: sequence-specific	10
MED21	9412	12p11.23	Co-activation	Basal Transcription Factor	10
MYBL1	4603	8q13.1	DNA Binding; Transactivation	DNA-Binding: sequence-specific	10
PKNOX1	5316	21q22.3	DNA Binding	DNA-Binding: sequence-specific	10
POU4F3	5459	5q32	DNA Binding	DNA-Binding: sequence-specific	10
PURB	5814	7p13	DNA Binding	Single stranded RNA/DNA binding	10
SOX11	6664	2p25.2	DNA Binding; Transactivation	DNA-Binding: sequence-specific	10
SP7	121340	12q13.13	DNA Binding; TF PPI; Transactivation	DNA-Binding: sequence-specific	10
TAF7	6879	5q31.3	TF PPI	Basal Transcription Factor	10
TCF12	6938	15q21.3	DNA Binding	DNA-Binding: sequence-specific	10
TFCP2	7024	12q13.12-q13.13	DNA Binding; Transactivation	DNA-Binding: sequence-specific	10
TTF1	7270	9q34.13	DNA Binding	DNA-Binding: sequence-specific	10
VEZF1	7716	17q22	DNA Binding; Transactivation	DNA-Binding: sequence-specific	10
ARNT	405	1q21.3	DNA Binding	DNA-Binding: sequence-specific	11
CBFA2T3	863	16q24.3	Non-specific DNA; Other; TF PPI	Transcription Factor Binding: tf co-factor binding	11
CRX	1406	19q13.33	DNA Binding; Transactivation	DNA-Binding: sequence-specific	11
ESR2	2100	14q23.2-q23.3	DNA Binding	DNA-Binding: sequence-specific	11
GATA1	2623	Xp11.23	Transactivation	DNA-Binding: sequence-specific	11
GATA2	2624	3q21.3	DNA Binding; Transactivation	DNA-Binding: sequence-specific	11
GATA5	140628	20q13.33	DNA Binding; Transactivation	DNA-Binding: sequence-specific	11
GCM1	8521	6p12.1	DNA Binding	DNA-Binding: sequence-specific	11
GLI1	2735	12q13.3	DNA Binding; Transactivation	DNA-Binding: sequence-specific	11
HDAC7	51564	12q13.11	Other; TF PPI	Transcription Factor Binding: tf co-factor binding	11
HIC1	3090	17p13.3	DNA Binding; Transactivation	DNA-Binding: sequence-specific	11
HMGN3	9324	6q14.1	Non-specific DNA	Transcription Regulatory Activity: heterochromatin interaction/binding	11
JDP2	122953	14q24.3	TF PPI; Transactivation	Transcription Factor Binding: tf co-factor binding	11
JUND	3727	19p13.11	DNA Binding; Transactivation	DNA-Binding: sequence-specific	11
KLF1	10661	19p13.13	DNA Binding; Transactivation	DNA-Binding: sequence-specific	11
MEF2B	100271849	19p13.11	DNA Binding; Transactivation	DNA-Binding: sequence-specific	11
MEF2D	4209	1q22	DNA Binding; Transactivation	DNA-Binding: sequence-specific	11
MEIS1	4211	2p14	Co-activation	Transcription Factor Binding: tf co-factor binding	11
MYC	4609	8q24.21	DNA Binding; TF PPI; Transactivation	DNA-Binding: sequence-specific	11
NFATC1	4772	18q23	DNA Binding; TF PPI; Transactivation	DNA-Binding: sequence-specific	11
NFE2	4778	12q13.13	DNA Binding	DNA-Binding: sequence-specific	11
NR2C1	7181	12q22	DNA Binding; Transactivation	DNA-Binding: sequence-specific	11
NR2E3	10002	15q23	Co-activation	Transcription Factor Binding: tf co-factor binding	11
PAX2	5076	10q24.31	DNA Binding; Transactivation	DNA-Binding: sequence-specific	11
POU2F1	5451	1q24.2	DNA Binding	DNA-Binding: sequence-specific	11
POU5F1	5460	6p21.33	DNA Binding	DNA-Binding: sequence-specific	11
PROP1	5626	5q35.3	DNA Binding; Transactivation	DNA-Binding: sequence-specific	11
RARA	5914	17q21.2	DNA Binding	DNA-Binding: sequence-specific	11
RBPJ	3516	4p15.2	DNA Binding	DNA-Binding: sequence-specific	11
RBPJL	11317	20q13.12	DNA Binding	DNA-Binding: sequence-specific	11
SIX3	6496	2p21	Co-activation	DNA-Binding: sequence-specific	11
STAT5A	6776	17q21.2	DNA Binding	DNA-Binding: sequence-specific	11
TBX19	9095	1q24.2	DNA Binding; Transactivation	DNA-Binding: sequence-specific	11
WT1	7490	11p13	DNA Binding; Other	DNA-Binding: sequence-specific	11
EWSR1	2130	22q12.2	TF PPI	Transcription Factor Binding: tf co-factor binding; Basal Transcription Factor	12
FOXD4	2298	9p24.3	DNA Binding	DNA-Binding: sequence-specific	12
FUS	2521	16p11.2	TF PPI	Transcription Factor Binding: tf co-factor binding	12
HDAC5	10014	17q21.31	TF PPI	Transcription Factor Binding: tf co-factor binding	12
HDAC6	10013	Xp11.23	Co-activation	Transcription Factor Binding: tf co-factor binding	12
HSF4	3299	16q22.1	DNA Binding	DNA-Binding: sequence-specific; Transcription Factor Binding: tf co-factor binding	12
KAT2A	2648	17q21.2	Transactivation	Transcription Regulatory Activity: heterochromatin interaction/binding	12
MBD1	4152	18q21.1	DNA Binding	Transcription Regulatory Activity: heterochromatin interaction/binding; DNA-Binding: non-sequence-specific	12
MED24	9862	17q21.1	Co-activation; TF PPI	Transcription Factor Binding: tf co-factor binding	12
MLLT1	4298	19p13.3	Co-activation; TF PPI	Transcription Factor Binding: tf co-factor binding	12
MZF1	7593	19q13.43	DNA Binding; Transactivation	DNA-Binding: sequence-specific	12
NCOA5	57727	20q13.12	Co-activation	Transcription Factor Binding: tf co-factor binding	12
PATZ1	23598	22q12.2	Co-activation	Transcription Factor Binding: tf co-factor binding; DNA-Binding: sequence-specific	12
RFX1	5989	19p13.12	DNA Binding	DNA-Binding: sequence-specific	12
RXRB	6257	6p21.32	Co-activation; DNA Binding	Transcription Factor Binding: tf co-factor binding	12
SIN3B	23309	19p13.11	TF PPI	Transcription Factor Binding: tf co-factor binding	12
SNAPC4	6621	9q34.3	Co-activation; DNA Binding; TF PPI	DNA-Binding: non-sequence-specific; Basal Transcription Factor; Transcription Factor Binding: tf co-factor binding	12
TAF1C	9013	16q24.1	TF PPI	Basal Transcription Factor	12
UBTF	7343	17q21.31	DNA Binding	DNA-Binding: sequence-specific	12
AHR	196	7p21.1	DNA Binding	DNA-Binding: sequence-specific	13
BATF	10538	14q24.3	TF PPI; Transactivation	Transcription Factor Binding: tf co-factor binding	13
CEBPB	1051	20q13.13	Co-activation; DNA Binding; TF PPI; Transactivation	Transcription Factor Binding: tf co-factor binding; DNA-Binding: sequence-specific	13
ELF4	2000	Xq26.1	DNA Binding; Transactivation	DNA-Binding: sequence-specific	13
IRF1	3659	5q31.1	DNA Binding	DNA-Binding: sequence-specific	13
IRF2	3660	4q35.1	DNA Binding	DNA-Binding: sequence-specific	13
IRF5	3663	7q32.1	DNA Binding; TF PPI; Transactivation	DNA-Binding: sequence-specific	13
IRF7	3665	11p15.5	DNA Binding; Transactivation	DNA-Binding: sequence-specific	13
MBD2	8932	18q21.2	Non-specific DNA; Other	DNA-Binding: non-sequence-specific; Transcription Regulatory Activity: heterochromatin interaction/binding	13
NFE2L3	9603	7p15.2	DNA Binding; Transactivation	DNA-Binding: sequence-specific	13
NFKB1	4790	4q24	DNA Binding; Transactivation	DNA-Binding: sequence-specific	13
NFKB2	4791	10q24.32	DNA Binding	DNA-Binding: sequence-specific	13
PML	5371	15q24.1	Co-activation	Transcription Factor Binding: tf co-factor binding	13
RUNX1	861	21q22.12	Transactivation	DNA-Binding: sequence-specific	13
RUNX2	860	6p21.1	DNA Binding; Transactivation	DNA-Binding: sequence-specific	13
SP100	6672	2q37.1	TF PPI	Transcription Factor Binding: tf co-factor binding	13
STAT6	6778	12q13.3	DNA Binding	DNA-Binding: sequence-specific	13
TGIF1	7050	18p11.31	DNA Binding; Transactivation	DNA-Binding: sequence-specific	13
VDR	7421	12q13.11	DNA Binding	DNA-Binding: sequence-specific	13
HOXA1	3198	7p15.2	Co-activation; DNA Binding; TF PPI	Transcription Factor Binding: tf co-factor binding; DNA-Binding: sequence-specific	14
HOXA11	3207	7p15.2	DNA Binding	DNA-Binding: sequence-specific	14
HOXA3	3200	7p15.2	DNA Binding	DNA-Binding: sequence-specific	14
HOXA5	3202	7p15.2	DNA Binding; Transactivation	DNA-Binding: sequence-specific	14
HOXA7	3204	7p15.2	DNA Binding; Transactivation	DNA-Binding: sequence-specific	14
HOXA9	3205	7p15.2	DNA Binding; Transactivation	DNA-Binding: sequence-specific	14
HOXB2	3212	17q21.32	Transactivation	DNA-Binding: sequence-specific	14
HOXB3	3213	17q21.32	DNA Binding; Transactivation	DNA-Binding: sequence-specific	14
HOXB4	3214	17q21.32	DNA Binding; Transactivation	DNA-Binding: sequence-specific	14
HOXB5	3215	17q21.32	DNA Binding	DNA-Binding: sequence-specific	14
HOXB7	3217	17q21.32	DNA Binding	DNA-Binding: sequence-specific	14
HOXB9	3219	17q21.32	DNA Binding; TF PPI; Transactivation	Transcription Factor Binding: tf co-factor binding; DNA-Binding: sequence-specific	14
HOXC10	3226	12q13.13	DNA Binding; Transactivation	DNA-Binding: sequence-specific	14
HOXC4	3221	12q13.13	DNA Binding	DNA-Binding: sequence-specific	14
HOXC6	3223	12q13.13	DNA Binding; Transactivation	DNA-Binding: sequence-specific	14
HOXD10	3236	2q31.1	Transactivation	DNA-Binding: sequence-specific	14
HOXD3	3232	2q31.1	DNA Binding; Transactivation	DNA-Binding: sequence-specific	14
BHLHE41	79365	12p12.1	DNA Binding; Other	Transcription Factor Binding: tf co-factor binding; DNA-Binding: sequence-specific	15
CITED2	10370	6q24.1	Co-activation; TF PPI; Transactivation	Transcription Factor Binding: tf co-factor binding	15
CTBP2	1488	10q26.13	TF PPI	Transcription Factor Binding: tf co-factor binding	15
CTNNB1	1499	3p22.1	Co-activation	Transcription Factor Binding: tf co-factor binding	15
CUX1	1523	7q22.1	DNA Binding	DNA-Binding: sequence-specific	15
MITF	4286	3p13	DNA Binding; Transactivation	DNA-Binding: sequence-specific	15
MLLT3	4300	9p21.3	Co-activation	Transcription Regulatory Activity: heterochromatin interaction/binding; Transcription Factor Binding: tf co-factor binding	15
NKX2-1	7080	14q13.3	DNA Binding	DNA-Binding: sequence-specific	15
PBX3	5090	9q33.3	DNA Binding; Transactivation	DNA-Binding: sequence-specific	15
PLAG1	5324	8q12.1	DNA Binding; Transactivation	DNA-Binding: sequence-specific	15
MAFA	389692	8q24.3	DNA Binding; Transactivation	DNA-Binding: sequence-specific	16
MYF6	4618	12q21.31	DNA Binding; Transactivation	DNA-Binding: sequence-specific	16
MYOD1	4654	11p15.1	DNA Binding	DNA-Binding: sequence-specific	16
MYOG	4656	1q32.1	DNA Binding	DNA-Binding: sequence-specific	16
PITX3	5309	10q24.32	DNA Binding; Transactivation	DNA-Binding: sequence-specific	16
ALX1	8092	12q21.31	DNA Binding; Transactivation	DNA-Binding: sequence-specific	17
ETV5	2119	3q27.2	Transactivation	DNA-Binding: sequence-specific	17
FOXD3	27022	1p31.3	DNA Binding	DNA-Binding: sequence-specific	17
PAX3	5077	2q36.1	TF PPI	Transcription Factor Binding: tf co-factor binding	17
SOX10	6663	22q13.1	DNA Binding; Transactivation	DNA-Binding: sequence-specific	17
CREB3L1	90993	11p11.2	DNA Binding	DNA-Binding: sequence-specific	18
CREB3L4	148327	1q21.3	DNA Binding	DNA-Binding: sequence-specific	18
EHF	26298	11p13	DNA Binding	DNA-Binding: sequence-specific	18
ELF5	2001	11p13	DNA Binding; Transactivation	DNA-Binding: sequence-specific	18
FOXA1	3169	14q21.1	DNA Binding	DNA-Binding: sequence-specific	18
FOXI1	2299	5q35.1	DNA Binding; Transactivation	DNA-Binding: sequence-specific	18
FOXP1	27086	3p13	DNA Binding	DNA-Binding: sequence-specific	18
GATA3	2625	10p14	DNA Binding	DNA-Binding: sequence-specific	18
LMX1B	4010	9q33.3	DNA Binding	DNA-Binding: sequence-specific	18
NKX3-1	4824	8p21.2	DNA Binding; Transactivation	DNA-Binding: sequence-specific	18
OVOL2	58495	20p11.23	DNA Binding; Transactivation	DNA-Binding: sequence-specific	18
SIX4	51804	14q23.1	DNA Binding; Transactivation	DNA-Binding: sequence-specific	18
SPDEF	25803	6p21.31	DNA Binding; Transactivation	Transcription Factor Binding: tf co-factor binding; DNA-Binding: sequence-specific	18
TBX5	6910	12q24.21	DNA Binding	DNA-Binding: sequence-specific	18
XBP1	7494	22q12	DNA Binding; Transactivation	DNA-Binding: sequence-specific	18
BARX2	8538	11q24.3	DNA Binding; Transactivation	DNA-Binding: sequence-specific	19
DLX5	1749	7q21.3	DNA Binding	DNA-Binding: sequence-specific	19
FHL2	2274	2q12.2	TF PPI	Transcription Factor Binding: tf co-factor binding	19
FOXF2	2295	6p25.3	DNA Binding	DNA-Binding: sequence-specific	19
GLI3	2737	7p14.1	DNA Binding	DNA-Binding: sequence-specific	19
GTF2IRD1	9569	7q11.23	DNA Binding; Transactivation	DNA-Binding: sequence-specific	19
HES2	54626	1p36.31	DNA Binding	DNA-Binding: sequence-specific	19
MEOX1	4222	17q21.31	Co-activation; DNA Binding; TF PPI; Transactivation	DNA-Binding: sequence-specific	19
MESP2	145873	15q26.1	Co-activation	DNA-Binding: sequence-specific; Transcription Factor Binding: tf co-factor binding	19
MSX2	4488	5q35.2	Transactivation	DNA-Binding: sequence-specific	19
NKX3-2	579	4p15.33	DNA Binding	Transcription Factor Binding: tf co-factor binding; DNA-Binding: sequence-specific	19
NOTCH3	4854	19p13.12	Co-activation; Transactivation	Transcription Factor Binding: tf co-factor binding	19
PAX9	5083	14q13.3	DNA Binding; Transactivation	DNA-Binding: sequence-specific	19
PIAS3	10401	1q21.1	TF PPI	Transcription Factor Binding: tf co-factor binding	19
PITX1	5307	5q31.1	DNA Binding	DNA-Binding: sequence-specific	19
PITX2	5308	4q25	DNA Binding; Transactivation	Transcription Factor Binding: tf co-factor binding	19
PRRX1	5396	1q24.2	TF PPI	Transcription Factor Binding: tf co-factor binding	19
PRRX2	51450	9q34.11	DNA Binding	DNA-Binding: sequence-specific	19
RARG	5916	12q13.13	DNA Binding; Transactivation	DNA-Binding: sequence-specific	19
RELA	5970	11q13.1	DNA Binding; Transactivation	DNA-Binding: sequence-specific	19
SIX2	10736	2p21	DNA Binding; Transactivation	DNA-Binding: sequence-specific	19
SNAI2	6591	8q11.21	DNA Binding	DNA-Binding: sequence-specific	19
TEAD2	8463	19q13.33	DNA Binding; Transactivation	DNA-Binding: sequence-specific	19
TEAD3	7005	6p21.31	DNA Binding	DNA-Binding: sequence-specific	19
TEAD4	7004	12p13.33	DNA Binding	DNA-Binding: sequence-specific	19
TFAP2A	7020	6p24.3	DNA Binding; Transactivation	DNA-Binding: sequence-specific	19
TWIST1	7291	7p21.1	DNA Binding	DNA-Binding: sequence-specific	19
AIRE	326	21q22.3	Transactivation	DNA-Binding: sequence-specific	20
FOXH1	8928	8q24.3	Co-activation; DNA Binding; TF PPI	Transcription Factor Binding: tf co-factor binding; DNA-Binding: sequence-specific	20
GCM2	9247	6p24.2	DNA Binding; Transactivation	DNA-Binding: sequence-specific	20
HES3	390992	1p36.31	DNA Binding; Transactivation	DNA-Binding: sequence-specific	20
HOXB1	3211	17q21.32	DNA Binding	DNA-Binding: sequence-specific	20
NANOG	79923	12p13.31	DNA Binding	DNA-Binding: sequence-specific	20
NR5A1	2516	9q33.3	DNA Binding	DNA-Binding: sequence-specific	20
SPZ1	84654	5q14.1	DNA Binding	DNA-Binding: sequence-specific	20
SRY	6736	Yp11.2	DNA Binding	DNA-Binding: sequence-specific	20
T	6862	6q27	Transactivation	DNA-Binding: sequence-specific	20
UTF1	8433	10q26.3	Co-activation	Transcription Factor Binding: tf co-factor binding	20
AFF3	3899	2q11.2	Non-specific DNA; Transactivation	DNA-Binding: non-sequence-specific	21
AR	367	Xq12	DNA Binding	DNA-Binding: sequence-specific	21
ARNT2	9915	15q25.1	DNA Binding; Transactivation	DNA-Binding: sequence-specific	21
CUX2	23316	12q24.11-q24.12	DNA Binding	DNA-Binding: sequence-specific	21
ESRRG	2104	1q41	DNA Binding; Transactivation	DNA-Binding: sequence-specific	21
HLF	3131	17q22	DNA Binding	DNA-Binding: sequence-specific	21
KCNIP3	30818	2q11.1	DNA Binding	DNA-Binding: sequence-specific	21
KLF15	28999	3q21.3	Co-activation; DNA Binding	DNA-Binding: sequence-specific; Transcription Factor Binding: tf co-factor binding	21
KLF9	687	9q21.12	DNA Binding; Transactivation	DNA-Binding: sequence-specific	21
MXI1	4601	10q25.2	DNA Binding	DNA-Binding: sequence-specific	21
MYEF2	50804	15q21.1	DNA Binding; Other	Single stranded RNA/DNA binding	21
NFIA	4774	1p31.3	DNA Binding; TF PPI; Transactivation	DNA-Binding: sequence-specific	21
NFIX	4784	19p13.13	DNA Binding; Transactivation	DNA-Binding: sequence-specific	21
NR2F1	7025	5q15	DNA Binding	DNA-Binding: sequence-specific	21
NR3C2	4306	4q31.23	Transactivation	DNA-Binding: sequence-specific	21
POU6F1	5463	12q13.13	DNA Binding; Other	DNA-Binding: sequence-specific	21
RARB	5915	3p24.2	DNA Binding; Transactivation	DNA-Binding: sequence-specific	21
RNF14	9604	5q31.3	Co-activation; TF PPI	Transcription Factor Binding: tf co-factor binding	21
RORB	6096	9q21.13	DNA Binding; Transactivation	DNA-Binding: sequence-specific	21
SALL1	6299	16q12.1	Other; TF PPI	Transcription Regulatory Activity: heterochromatin interaction/binding	21
SALL2	6297	14q11.2	DNA Binding	DNA-Binding: sequence-specific	21
SNURF	8926	15q11.2	TF PPI	Transcription Factor Binding: tf co-factor binding	21
SOX5	6660	12p12.1	DNA Binding	DNA-Binding: sequence-specific	21
TEF	7008	22q13.2	DNA Binding	DNA-Binding: sequence-specific	21
THRA	7067	17q21.1	Co-activation; DNA Binding	DNA-Binding: sequence-specific	21
ZBTB16	7704	11q23.2	DNA Binding; Other	DNA-Binding: sequence-specific	21
ATF3	467	1q32.3	DNA Binding; Transactivation	DNA-Binding: sequence-specific	22
BHLHE40	8553	3p26.1	DNA Binding	Transcription Factor Binding: tf co-factor binding; DNA-Binding: sequence-specific	22
CEBPD	1052	8q11.21	DNA Binding; Transactivation	DNA-Binding: sequence-specific	22
EGR1	1958	5q31.2	DNA Binding; Transactivation	DNA-Binding: sequence-specific	22
FOS	2353	14q24.3	DNA Binding	DNA-Binding: sequence-specific	22
FOSB	2354	19q13.32	TF PPI	Transcription Factor Binding: tf co-factor binding	22
FOSL1	8061	11q13.1	DNA Binding	Transcription Factor Binding: tf co-factor binding; DNA-Binding: sequence-specific	22
FOSL2	2355	2p23.2	DNA Binding; Transactivation	DNA-Binding: sequence-specific	22
JUN	3725	1p32.1	DNA Binding; Transactivation	DNA-Binding: sequence-specific	22
JUNB	3726	19p13.13	DNA Binding; Transactivation	DNA-Binding: sequence-specific	22
KLF10	7071	8q22.3	DNA Binding	DNA-Binding: sequence-specific	22
KLF4	9314	9q31.2	DNA Binding; Transactivation	DNA-Binding: sequence-specific	22
MAFF	23764	22q13.1	DNA Binding; TF PPI; Transactivation	DNA-Binding: sequence-specific	22
MAFK	7975	7p22.3	DNA Binding	DNA-Binding: sequence-specific	22
NCOA7	135112	6q22.31-q22.32	Co-activation	Transcription Factor Binding: tf co-factor binding	22
NR4A1	3164	12q13.13	DNA Binding	DNA-Binding: sequence-specific	22
NR4A2	4929	2q24.1	Co-activation; DNA Binding; Transactivation	DNA-Binding: sequence-specific	22
SERTAD1	29950	19q13.2	Co-activation; Transactivation	Transcription Factor Binding: tf co-factor binding	22
SNAI1	6615	20q13.13	DNA Binding; Transactivation	DNA-Binding: sequence-specific	22
SRF	6722	6p21.1	DNA Binding; Transactivation	DNA-Binding: sequence-specific	22
AES	166	19p13.3	TF PPI	Transcription Factor Binding: tf co-factor binding	23
DBP	1628	19q13.33	DNA Binding; Transactivation	DNA-Binding: sequence-specific	23
DDIT3	1649	12q13.3	Co-activation	DNA-Binding: sequence-specific; Transcription Factor Binding: tf co-factor binding	23
DRAP1	10589	11q13.1	TF PPI	Transcription Factor Binding: tf co-factor binding	23
NR1H2	7376	19q13.33	DNA Binding	DNA-Binding: sequence-specific	23
NRL	4901	14q11.2-q12	DNA Binding	DNA-Binding: sequence-specific	23
PIN1	5300	19p13.2	TF PPI	Transcription Factor Binding: tf co-factor binding	23
RING1	6015	6p21.32	TF PPI	Transcription Factor Binding: tf co-factor binding	23
SRA1	10011	5q31.3	Co-activation; Other	Transcription Factor Binding: tf co-factor binding	23
USF2	7392	19q13.12	DNA Binding	DNA-Binding: sequence-specific	23
ARID1B	57492	6q25.3	TF PPI	Transcription Regulatory Activity: heterochromatin interaction/binding; Transcription Factor Binding: tf co-factor binding; DNA-Binding: non-sequence-specific	24
ARID4A	5926	14q23.1	Other; TF PPI	Transcription Factor Binding: tf co-factor binding; Transcription Regulatory Activity: heterochromatin interaction/binding	24
ATF2	1386	2q31.1	Transactivation	DNA-Binding: sequence-specific	24
ATF7	11016	12q13.13	DNA Binding	DNA-Binding: sequence-specific	24
BACH1	571	21q21.3	DNA Binding; Transactivation	DNA-Binding: sequence-specific	24
BPTF	2186	17q24.2	DNA Binding	Transcription Factor Binding: tf co-factor binding; DNA-Binding: sequence-specific	24
BTAF1	9044	10q23.32	TF PPI	Basal Transcription Factor	24
CCNT2	905	2q21.3	Co-activation; TF PPI	Transcription Factor Binding: tf co-factor binding	24
CLOCK	9575	4q12	Co-activation	DNA-Binding: sequence-specific	24
CREB1	1385	2q33.3	DNA Binding; Transactivation	DNA-Binding: sequence-specific	24
CTCF	10664	16q22.1	DNA Binding; Transactivation	DNA-Binding: sequence-specific	24
DCP1A	55802	3p21.1	Co-activation	Transcription Factor Binding: tf co-factor binding	24
DDX3X	1654	Xp11.4	TF PPI	Transcription Factor Binding: tf co-factor binding	24
ELF1	1997	13q14.11	DNA Binding; TF PPI	DNA-Binding: sequence-specific	24
ELF2	1998	4q31.1	DNA Binding; Transactivation	DNA-Binding: sequence-specific	24
ELK4	2005	1q32.1	DNA Binding	DNA-Binding: sequence-specific	24
EP300	2033	22q13.2	Co-activation	Transcription Factor Binding: tf co-factor binding	24
ETV3	2117	1q23.1	DNA Binding	DNA-Binding: sequence-specific	24
FOXJ2	55810	12p13.31	DNA Binding	DNA-Binding: sequence-specific	24
FOXO3	2309	6q21	DNA Binding; Transactivation	DNA-Binding: sequence-specific	24
HIVEP2	3097	6q24.2	DNA Binding	DNA-Binding: sequence-specific	24
KDM5A	5927	12p13.33	Co-activation; TF PPI	Transcription Factor Binding: tf co-factor binding	24
KLF7	8609	2q33.3	DNA Binding; Transactivation	DNA-Binding: sequence-specific	24
LPP	4026	3q27.3-q28	Co-activation	Transcription Factor Binding: tf co-factor binding	24
MKL2	57496	16p13.12	Co-activation	Transcription Factor Binding: tf co-factor binding	24
MTF1	4520	1p34.3	Transactivation	DNA-Binding: sequence-specific	24
NCOA4	8031	10q11.22	Co-activation	Transcription Factor Binding: tf co-factor binding	24
NCOR1	9611	17p12-p11.2	TF PPI	Transcription Factor Binding: tf co-factor binding; Transcription Regulatory Activity: heterochromatin interaction/binding	24
NFATC2	4773	20q13.2	DNA Binding	DNA-Binding: sequence-specific	24
NFATC3	4775	16q22.1	DNA Binding; Transactivation	DNA-Binding: sequence-specific	24
NFIC	4782	19p13.3	DNA Binding; Transactivation	DNA-Binding: sequence-specific	24
NFX1	4799	9p13.3	DNA Binding; Transactivation	Single stranded RNA/DNA binding	24
POLR2A	5430	17p13.1	DNA Binding; TF PPI	Basal Transcription Factor	24
PURA	5813	5q31.3	DNA Binding	Single stranded RNA/DNA binding	24
RB1	5925	13q14.2	TF PPI; Transactivation	Transcription Factor Binding: tf co-factor binding	24
REL	5966	2p16.1	DNA Binding	DNA-Binding: sequence-specific	24
REST	5978	4q12	DNA Binding	DNA-Binding: sequence-specific	24
RREB1	6239	6p24.3	DNA Binding	DNA-Binding: sequence-specific	24
SIN3A	25942	15q24.2	Other; TF PPI	Transcription Factor Binding: tf co-factor binding; Transcription Regulatory Activity: heterochromatin interaction/binding	24
SP1	6667	12q13.13	DNA Binding	DNA-Binding: sequence-specific	24
SP3	6670	2q31.1	DNA Binding	DNA-Binding: sequence-specific	24
TAF1	6872	Xq13.1	TF PPI	Transcription Factor Binding: tf co-factor binding	24
TAF3	83860	10p14	TF PPI	Basal Transcription Factor	24
TMF1	7110	3p14.1	Co-activation; TF PPI	Transcription Factor Binding: tf co-factor binding	24
TOPORS	10210	9p21.1	DNA Binding	Single stranded RNA/DNA binding	24
TRIP11	9321	14q32.12	TF PPI	Transcription Factor Binding: tf co-factor binding	24
TRRAP	8295	7q22.1	TF PPI	Transcription Factor Binding: tf co-factor binding	24
CEBPE	1053	14q11.2	DNA Binding; TF PPI; Transactivation	DNA-Binding: sequence-specific; Transcription Factor Binding: tf co-factor binding	25
CIITA	4261	16p13.13	DNA Binding; Transactivation	Transcription Factor Binding: tf co-factor binding	25
EOMES	8320	3p24.1	DNA Binding	DNA-Binding: sequence-specific	25
GFI1	2672	1p22.1	DNA Binding	DNA-Binding: sequence-specific	25
IKZF1	10320	7p12.2	DNA Binding; Transactivation	DNA-Binding: sequence-specific	25
IKZF3	22806	17q12-q21.1	DNA Binding; TF PPI; Transactivation	Transcription Factor Binding: tf co-factor binding; DNA-Binding: sequence-specific	25
IRF8	3394	16q24.1	DNA Binding; Transactivation	DNA-Binding: sequence-specific	25
PAX5	5079	9p13.2	DNA Binding	DNA-Binding: sequence-specific	25
POU2AF1	5450	11q23.1	Co-activation; TF PPI	Transcription Factor Binding: tf co-factor binding	25
POU2F2	5452	19q13.2	DNA Binding	DNA-Binding: sequence-specific	25
SPI1	6688	11p11.2	DNA Binding; Transactivation	DNA-Binding: sequence-specific	25
CDX1	1044	5q32	DNA Binding	DNA-Binding: sequence-specific	26
CDX2	1045	13q12.2	DNA Binding; Transactivation	DNA-Binding: sequence-specific	26
NEUROG3	50674	10q22.1	Non-specific DNA	DNA-Binding: sequence-specific	26
PAX4	5078	7q32.1	DNA Binding; Transactivation	DNA-Binding: sequence-specific	26
PDX1	3651	13q12.2	DNA Binding; Transactivation	DNA-Binding: sequence-specific	26
ATF4	468	22q13.1	Transactivation	DNA-Binding: sequence-specific	27
BAG1	573	9p13.3	TF PPI	Transcription Factor Binding: tf co-factor binding	27
GTF2B	2959	1p22.2	TF PPI	Basal Transcription Factor; Transcription Factor Binding: tf co-factor binding	27
GTF3A	2971	13q12.2	DNA Binding	DNA-Binding: sequence-specific	27
HDAC3	8841	5q31.3	Co-activation; TF PPI	Transcription Factor Binding: tf co-factor binding	27
HMGB1	3146	13q12.3	Co-activation; Other	Transcription Factor Binding: tf co-factor binding	27
MAX	4149	14q23.3	DNA Binding	DNA-Binding: sequence-specific	27
MNAT1	4331	14q23.1	Co-activation; TF PPI	Transcription Factor Binding: tf co-factor binding; Basal Transcription Factor	27
PHB2	11331	12p13.31	TF PPI	Transcription Factor Binding: tf co-factor binding	27
RPL7	6129	8q21.11	TF PPI	Transcription Factor Binding: tf co-factor binding	27
RPL7A	6130	9q34.2	TF PPI	Transcription Factor Binding: tf co-factor binding	27
SMARCE1	6605	17q21.2	Co-activation; TF PPI	Transcription Factor Binding: tf co-factor binding	27
SNW1	22938	14q24.3	Co-activation; TF PPI	Transcription Factor Binding: tf co-factor binding	27
SUB1	10923	5p13.3	TF PPI	Basal Transcription Factor	27
TAF9	6880	5q13.2	TF PPI	Basal Transcription Factor	27
DLX2	1746	2q31.1	DNA Binding; Transactivation	DNA-Binding: sequence-specific	28
E2F6	1876	2p25.1	DNA Binding	DNA-Binding: sequence-specific	28
FOXL2	668	3q22.3	DNA Binding; Transactivation	DNA-Binding: sequence-specific	28
HMX2	3167	10q26.13	DNA Binding	DNA-Binding: sequence-specific	28
HOXD13	3239	2q31.1	DNA Binding	DNA-Binding: sequence-specific	28
LHX2	9355	9q33.3	DNA Binding; Transactivation	DNA-Binding: sequence-specific	28
LHX3	8022	9q34.3	DNA Binding	DNA-Binding: sequence-specific	28
NHLH1	4807	1q23.2	DNA Binding	DNA-Binding: sequence-specific	28
NHLH2	4808	1p13.1	DNA Binding	DNA-Binding: sequence-specific	28
NKX2-5	1482	5q35.1	DNA Binding; TF PPI; Transactivation	DNA-Binding: sequence-specific	28
NR0B1	190	Xp21.2	DNA Binding	Transcription Factor Binding: tf co-factor binding; DNA-Binding: non-sequence-specific	28
PAX7	5081	1p36.13	DNA Binding; Transactivation	DNA-Binding: sequence-specific; Transcription Regulatory Activity: heterochromatin interaction/binding	28
POU3F1	5453	1p34.3	DNA Binding; Transactivation	DNA-Binding: sequence-specific	28
POU4F1	5457	13q31.1	DNA Binding	DNA-Binding: sequence-specific	28
RAX	30062	18q21.32	DNA Binding	DNA-Binding: sequence-specific	28
SOX2	6657	3q26.33	DNA Binding; Transactivation	DNA-Binding: sequence-specific	28
SOX21	11166	13q32.1	DNA Binding	DNA-Binding: sequence-specific	28
TFAP2E	339488	1p34.3	DNA Binding	DNA-Binding: sequence-specific	28
ZIC1	7545	3q24	DNA Binding; Transactivation	DNA-Binding: sequence-specific	28
ZIC2	7546	13q32.3	DNA Binding; Transactivation	DNA-Binding: sequence-specific	28
ZIC5	85416	13q32.3	DNA Binding	DNA-Binding: sequence-specific	28
ARNTL	406	11p15.3	DNA Binding; Transactivation	DNA-Binding: sequence-specific	29
BCL6	604	3q27.3	DNA Binding; Transactivation	DNA-Binding: sequence-specific	29
EPAS1	2034	2p21	Co-activation; DNA Binding	Transcription Factor Binding: tf co-factor binding; DNA-Binding: sequence-specific	29
FOXC1	2296	6p25.3	DNA Binding; Transactivation	DNA-Binding: sequence-specific	29
FOXO1	2308	13q14.11	DNA Binding; Transactivation	DNA-Binding: sequence-specific	29
FOXP2	93986	7q31.1	Transactivation	DNA-Binding: sequence-specific	29
GLI2	2736	2q14.2	Transactivation	DNA-Binding: sequence-specific	29
GTF2A1L	11036	2p16.3	Co-activation	Basal Transcription Factor	29
HIF1A	3091	14q23.2	Transactivation	DNA-Binding: sequence-specific	29
MAFB	9935	20q12	TF PPI	Transcription Factor Binding: tf co-factor binding	29
MEIS2	4212	15q14	DNA Binding; Transactivation	DNA-Binding: sequence-specific	29
MEOX2	4223	7p21.2	DNA Binding; Transactivation	DNA-Binding: sequence-specific	29
NFE2L1	4779	17q21.32	DNA Binding; Transactivation	DNA-Binding: sequence-specific	29
NR1D1	9572	17q21.1	DNA Binding	DNA-Binding: sequence-specific	29
NRG1	3084	8p12	Co-activation; DNA Binding	Transcription Factor Binding: tf co-factor binding	29
PPARD	5467	6p21.31	Other	DNA-Binding: sequence-specific	29
RXRA	6256	9q34.2	Co-activation; DNA Binding; Transactivation	Transcription Factor Binding: tf co-factor binding; DNA-Binding: sequence-specific	29
SOX9	6662	17q24.3	DNA Binding	DNA-Binding: sequence-specific	29
STAT3	6774	17q21.2	DNA Binding	DNA-Binding: sequence-specific	29
TCF7L1	83439	2p11.2	DNA Binding	DNA-Binding: sequence-specific	29
TEAD1	7003	11p15.3	DNA Binding; Transactivation	DNA-Binding: sequence-specific	29
TFE3	7030	Xp11.23	DNA Binding	DNA-Binding: sequence-specific	29
WWTR1	25937	3q25.1	TF PPI	Transcription Factor Binding: tf co-factor binding	29
ELF3	1999	1q32.1	DNA Binding; Transactivation	DNA-Binding: sequence-specific	30
FOXF1	2294	16q24.1	DNA Binding	DNA-Binding: sequence-specific	30
FOXL1	2300	16q24.1	DNA Binding	DNA-Binding: sequence-specific	30
FOXQ1	94234	6p25.3	DNA Binding	DNA-Binding: sequence-specific	30
GATA6	2627	18q11.2	TF PPI	Transcription Factor Binding: tf co-factor binding	30
HNF1B	6928	17q12	DNA Binding	DNA-Binding: sequence-specific	30
KLF5	688	13q22.1	DNA Binding	DNA-Binding: sequence-specific	30
MECOM	2122	3q26.2	DNA Binding; Transactivation	DNA-Binding: sequence-specific	30
PPARG	5468	3p25.2	DNA Binding	DNA-Binding: sequence-specific	30
TCF7L2	6934	10q25.2-q25.3	Co-activation; DNA Binding	DNA-Binding: sequence-specific; Transcription Factor Binding: tf co-factor binding	30
