# Supplementary material for: Thirty biologically interpretable clusters of transcription factors distinguish cancer type
Source: BMC Genomics. 2018 Oct 11;19:738. doi: 10.1186/s12864-018-5093-z (PMC6180590; doi:10.1186/s12864-018-5093-z)
Supplement: Supplementary file 3 — Results of ToppGene analysis of each of the thirty biological components. (XLSX 571 kb) [file 12864_2018_5093_MOESM3_ESM.xlsx]

## Sheet: Supplementary Table 1
Category	ID	Name	Source	p-value	q-value Bonferroni	q-value FDR B&H	q-value FDR B&Y	Hit Count in Query List	Hit Count in Genome	Hit in Query List
GO: Molecular Function	GO:0003723	RNA binding		1.868e-26	2.942e-23	2.942e-23	2.336e-22	209	1632	MRPL23,EPRS,SRRM1,ZNF326,SMNDC1,SMC1A,ADAR,MEX3C,CNOT6,ARL6IP4,FAU,WDR75,UBR5,UTP15,XPO5,UCHL5,NAF1,RGPD3,NUFIP2,MKI67,SLC25A11,SYNCRIP,XRN2,SFPQ,FYTTD1,NAA15,TRA2B,PHF6,UTP23,MRPL28,C7orf50,API5,CWC22,PABPC1,PRPF40A,DIS3,ESF1,RAD51AP1,NOP58,NSUN3,CELF1,CDK13,CCAR1,ZFR,EIF3A,SPEN,CNOT1,DCP1A,SON,DHX36,SMG1,EDF1,UBAP2,RBMXL1,RRP1B,RBM12B,PPRC1,ZC3H8,ZC3H15,RBM26,MRPL43,BARD1,SRP72,SRPK1,NCBP1,GPAT…
GO: Molecular Function	GO:0005524	ATP binding		3.189e-19	5.023e-16	2.511e-16	1.994e-15	177	1475	EPRS,KIF18A,BRIP1,ERCC6,ATAD5,SMC1A,MCM2,MCM4,MCM6,RRM1,ZRANB3,RYK,PIK3R4,MKI67,PIP5K1A,TAOK1,DYRK2,TTF2,SMARCA5,KIF27,APAF1,LMTK2,CHD8,MSH2,CAMK1,CHORDC1,SMC2,FANCM,ATAD2,STK16,SCYL2,PMVK,CDK13,N4BP2,MCM9,TPX2,POLQ,STK38L,SPATA5,YME1L1,FIGNL1,PLK4,MAP3K2,ATP5D,DHX36,SMG1,SPAST,ATR,MCM8,CDK12,VPS4A,TTLL5,GART,SRPK1,RAD54L2,SMC5,HELB,BLM,GMPS,STK4,NEK2,MDN1,ATP11B,BRAF,PAPOLA,FASTK,DDX18,CSNK1G1,B…
GO: Molecular Function	GO:0004386	helicase activity		7.84e-19	1.235e-15	4.116e-16	3.268e-15	47	172	BRIP1,ERCC6,LSG1,MCM2,MCM4,MCM6,ZRANB3,MRE11,TTF2,SMARCA5,GINS4,CHD8,FANCM,MCM9,DHX36,MCM8,NBN,RAD54L2,HELB,BLM,DDX18,ASCC3,DDX52,BTAF1,DICER1,DDX20,DDX21,HELLS,CHD1,RAD54B,SHPRH,WRN,PRIM1,ERCC6L,SMARCAD1,DHX33,GINS1,DDX3X,DHX8,DHX9,DHX15,DDX46,HELZ,DNA2,ENTPD7,RECQL,G3BP1
GO: Molecular Function	GO:0030554	adenyl nucleotide binding		2.743e-18	4.32e-15	8.669e-16	6.883e-15	179	1530	EPRS,KIF18A,BRIP1,ERCC6,ATAD5,SMC1A,MCM2,MCM4,MCM6,RRM1,ZRANB3,RYK,PIK3R4,MKI67,PIP5K1A,TAOK1,DYRK2,TTF2,SMARCA5,KIF27,APAF1,LMTK2,CHD8,MSH2,CAMK1,CHORDC1,SMC2,FANCM,ATAD2,STK16,SCYL2,PMVK,CDK13,N4BP2,MCM9,TPX2,POLQ,STK38L,SPATA5,YME1L1,FIGNL1,PLK4,MAP3K2,ATP5D,DHX36,SMG1,SPAST,ATR,MCM8,CDK12,VPS4A,TTLL5,GART,SRPK1,RAD54L2,SMC5,HELB,BLM,GMPS,STK4,NEK2,MDN1,ATP11B,BRAF,PAPOLA,FASTK,DDX18,CSNK1G1,B…
GO: Molecular Function	GO:0032559	adenyl ribonucleotide binding		2.752e-18	4.334e-15	8.669e-16	6.883e-15	178	1518	EPRS,KIF18A,BRIP1,ERCC6,ATAD5,SMC1A,MCM2,MCM4,MCM6,RRM1,ZRANB3,RYK,PIK3R4,MKI67,PIP5K1A,TAOK1,DYRK2,TTF2,SMARCA5,KIF27,APAF1,LMTK2,CHD8,MSH2,CAMK1,CHORDC1,SMC2,FANCM,ATAD2,STK16,SCYL2,PMVK,CDK13,N4BP2,MCM9,TPX2,POLQ,STK38L,SPATA5,YME1L1,FIGNL1,PLK4,MAP3K2,ATP5D,DHX36,SMG1,SPAST,ATR,MCM8,CDK12,VPS4A,TTLL5,GART,SRPK1,RAD54L2,SMC5,HELB,BLM,GMPS,STK4,NEK2,MDN1,ATP11B,BRAF,PAPOLA,FASTK,DDX18,CSNK1G1,B…
GO: Molecular Function	GO:0003682	chromatin binding		5.713e-17	8.999e-14	1.5e-14	1.191e-13	84	513	NCOA3,ERCC6,RNF168,STAG1,SMC1A,ACTL6A,EYA3,ARID1A,TRRAP,ATXN7,ZNHIT1,NCOA2,RNF169,SMARCA5,SFPQ,PARG,CHD8,FANCM,SKIL,ATAD2,MBD3,CTCF,SMARCC1,POLQ,STAG2,NCOA6,SP3,ASH1L,BRCA1,TAF2,NOC3L,NSD1,BAZ1B,ADNP,TFAM,POLR3A,CCNT1,CCNT2,MSH6,SF3B1,WDHD1,SMC3,EXO1,ZNF431,CDK1,SUZ12,CDC6,TOP1,TOP2A,HDAC2,HELLS,WBP2,TPR,CENPF,PHF1,ATAD2B,WDR13,KDM6A,NIPBL,VRK1,POLA1,POLR2B,WRN,SIN3A,MED1,CLOCK,ATF2,ANKRD17,ZNF14…
GO: Molecular Function	GO:0008094	DNA-dependent ATPase activity		1.912e-16	3.011e-13	4.302e-14	3.415e-13	32	93	BRIP1,ERCC6,LSG1,MCM4,MCM6,BPTF,MRE11,TTF2,CHD8,POLQ,DHX36,NBN,HELB,BLM,ASCC3,GTF2H3,TOP1,TOP2A,CHD1,RAD54B,DSCC1,WRN,XRCC2,RAD18,DDX3X,DHX9,DNA2,ENTPD7,RBBP4,RECQL,RFC3,G3BP1
GO: Molecular Function	GO:0016887	ATPase activity		2.154e-15	3.392e-12	3.858e-13	3.063e-12	74	446	KIF18A,BRIP1,ERCC6,LSG1,MCM4,MCM6,BPTF,MRE11,TTF2,SMARCA5,KIF27,CHD8,MSH2,ATAD2,ATF7IP,POLQ,YME1L1,FIGNL1,ATP5D,DHX36,ATP5I,ATP6V0A1,SPAST,VPS4A,RSF1,NBN,RAD54L2,HELB,BLM,MDN1,ATP11B,DDX18,ASCC3,DDX52,MSH6,GTF2H3,KIF4B,DDX20,DDX21,TOP1,TOP2A,CENPE,CHD1,KIF24,ATAD2B,RAD54B,DSCC1,KIF23,VPS4B,WRN,IDE,XRCC2,KIF20B,RAD18,KIF4A,DHX33,DDX3X,DHX8,DHX9,DHX15,DDX46,KIF15,KIF14,KIF2A,KIF5B,DNA2,KIF11,ENTPD7…
GO: Molecular Function	GO:0001882	nucleoside binding		2.204e-15	3.472e-12	3.858e-13	3.063e-12	195	1838	EPRS,KIF18A,BRIP1,ERCC6,ATAD5,LSG1,SMC1A,MCM2,MCM4,MCM6,RRM1,ZRANB3,RYK,PIK3R4,ADSS,MKI67,PIP5K1A,POLR1B,TAOK1,DYRK2,TTF2,SMARCA5,KIF27,APAF1,LMTK2,CHD8,MSH2,CAMK1,CHORDC1,SMC2,FANCM,ATAD2,MFN1,STK16,SCYL2,PMVK,CDK13,N4BP2,MCM9,TPX2,POLQ,STK38L,SPATA5,YME1L1,FIGNL1,PLK4,MAP3K2,ATP5D,DHX36,SMG1,SPAST,ATR,MCM8,CDK12,VPS4A,TTLL5,GART,SRPK1,RAD54L2,SMC5,HELB,BLM,GMPS,STK4,RAB10,NEK2,MDN1,RAB24,ATP11B…
GO: Molecular Function	GO:0032549	ribonucleoside binding		3.026e-15	4.766e-12	4.766e-13	3.784e-12	194	1831	EPRS,KIF18A,BRIP1,ERCC6,ATAD5,LSG1,SMC1A,MCM2,MCM4,MCM6,RRM1,ZRANB3,RYK,PIK3R4,ADSS,MKI67,PIP5K1A,POLR1B,TAOK1,DYRK2,TTF2,SMARCA5,KIF27,APAF1,LMTK2,CHD8,MSH2,CAMK1,CHORDC1,SMC2,FANCM,ATAD2,MFN1,STK16,SCYL2,PMVK,CDK13,N4BP2,MCM9,TPX2,POLQ,STK38L,SPATA5,YME1L1,FIGNL1,PLK4,MAP3K2,ATP5D,DHX36,SMG1,SPAST,ATR,MCM8,CDK12,VPS4A,TTLL5,GART,SRPK1,RAD54L2,SMC5,HELB,BLM,GMPS,STK4,RAB10,NEK2,MDN1,RAB24,ATP11B…
GO: Biological Process	GO:0051276	chromosome organization		1.54e-60	9.282e-57	9.282e-57	8.615e-56	230	1189	NCOA3,KIF18A,BRIP1,RNF168,STAG1,SMC1A,MCM2,MCM4,MCM6,ACTL6A,EYA3,ARID1A,TRRAP,ESCO1,MYSM1,ZRANB3,FANCD2,BPTF,ARID1B,WDR75,UBR5,ATXN7,TAOK1,ZNHIT1,NCOA2,MRE11,SMARCA5,SFPQ,MTF2,HAT1,BEND3,GINS4,CHD8,MSH2,CAMK1,NAA50,STIL,SMC2,ATAD2,MBD3,YEATS2,SETD2,CTCF,CENPI,EPC1,PAXIP1,NUP133,RACGAP1,SMARCC1,MTBP,KDM2A,TAF5L,POLD3,KDM1B,TNKS2,GEN1,STAG2,MYB,DHX36,SMG1,KDM5B,ARID4B,ATR,VPS4A,RSF1,ASH1L,NBN,SRPK1…
GO: Biological Process	GO:0022402	cell cycle process		2.305e-44	1.389e-40	6.946e-41	6.447e-40	223	1385	KIF18A,BRIP1,STAG1,SMC1A,MCM2,MCM4,MCM6,CEP76,MCM10,RRM2,TRRAP,BIRC6,ESCO1,NUP54,CNOT6,FANCD2,PIK3R4,CEP78,CRLF3,MKI67,TAOK1,ZNHIT1,VCPIP1,CUL2,MRE11,SFPQ,USP28,DTL,MSH2,NAA50,STIL,CHORDC1,USP37,SMC2,FANCM,SKIL,SKP2,PIAS1,PRPF40A,GADD45GIP1,CTCF,CDK13,CENPI,TPX2,NUP133,RACGAP1,MTBP,CEP152,CLSPN,CNOT1,GEN1,TXLNG,PLK4,STAG2,MYB,SON,NUP50,CENPJ,SPAST,ATR,MCM8,VPS4A,PPP1R12A,BARD1,NBN,TUBGCP4,NEDD1,S…
GO: Biological Process	GO:0007049	cell cycle		2.317e-43	1.397e-39	4.656e-40	4.321e-39	257	1766	KIF18A,BRIP1,STAG1,SMC1A,MCM2,MCM4,MCM6,CEP76,MCM10,RRM1,RRM2,TRRAP,BIRC6,ESCO1,LIN9,NUP54,CNOT6,FANCD2,PIK3R4,CEP78,CRLF3,MKI67,TAOK1,ZNHIT1,VCPIP1,CUL2,MRE11,SFPQ,USP28,DTL,MSH2,CAMK1,NAA50,STIL,CHORDC1,USP37,SMC2,FANCM,SKIL,SKP2,PIAS1,PRPF40A,GADD45GIP1,CTCF,CDK13,CENPI,TPX2,NUP133,CCAR1,RACGAP1,MTBP,CEP152,PRR11,CLSPN,CNOT1,FIGNL1,GEN1,TXLNG,PLK4,STAG2,MYB,SON,NUP50,CENPJ,SPAST,ATR,MCM8,CDK12…
GO: Biological Process	GO:1903047	mitotic cell cycle process		1.478e-40	8.907e-37	2.227e-37	2.067e-36	170	931	KIF18A,STAG1,SMC1A,MCM2,MCM4,MCM6,CEP76,MCM10,RRM2,TRRAP,BIRC6,NUP54,CNOT6,CEP78,CRLF3,VCPIP1,CUL2,MRE11,MSH2,NAA50,STIL,USP37,SMC2,SKP2,PIAS1,CDK13,TPX2,NUP133,RACGAP1,MTBP,CEP152,CLSPN,CNOT1,GEN1,PLK4,STAG2,MYB,NUP50,CENPJ,SPAST,MCM8,VPS4A,PPP1R12A,NBN,TUBGCP4,NEDD1,SMC5,CHMP2A,CCNK,RCC2,WDR43,NUP205,BLM,NEK2,PSME4,DBF4,BUB1,BUB1B,PDS5A,TIMELESS,ADAM17,TAF2,NUP160,NPAT,NUP98,CASP2,PRC1,NCAPH,TF…
GO: Biological Process	GO:0000278	mitotic cell cycle		2.029e-39	1.223e-35	2.446e-36	2.27e-35	177	1016	KIF18A,STAG1,SMC1A,MCM2,MCM4,MCM6,CEP76,MCM10,RRM1,RRM2,TRRAP,BIRC6,NUP54,CNOT6,CEP78,CRLF3,VCPIP1,CUL2,MRE11,MSH2,NAA50,STIL,USP37,SMC2,SKP2,PIAS1,CDK13,TPX2,NUP133,RACGAP1,MTBP,CEP152,CLSPN,CNOT1,GEN1,PLK4,STAG2,MYB,NUP50,CENPJ,SPAST,MCM8,VPS4A,PPP1R12A,NBN,TUBGCP4,NEDD1,SMC5,CHMP2A,CCNK,RCC2,WDR43,NUP205,BLM,NEK2,PSME4,BRCA2,DBF4,BUB1,BUB1B,PDS5A,TIMELESS,ADAM17,TAF2,NUP160,NPAT,NUP98,CASP2,PR…
GO: Biological Process	GO:0007059	chromosome segregation		2.782e-37	1.677e-33	2.795e-34	2.594e-33	93	333	KIF18A,STAG1,SMC1A,ESCO1,FANCD2,TAOK1,MRE11,SFPQ,NAA50,STIL,SMC2,FANCM,CTCF,CENPI,FAM96B,NUP133,RACGAP1,MTBP,GEN1,STAG2,VPS4A,SRPK1,SMC5,CENPK,CHMP2A,RCC2,NEK2,BRCA1,BRCA2,BUB1,BUB1B,PDS5A,NUP160,NUP98,PUM2,PRC1,NCAPH,LATS1,SMC3,KIF4B,CDC6,ZW10,TOP1,TOP2A,TPR,CENPE,CENPF,TRIP13,TTK,DSCC1,NIPBL,KIF23,AHCTF1,VPS4B,CENPO,XPO1,CSNK2A1,PUM1,ESPL1,KNTC1,RAD18,INCENP,ERCC6L,CENPL,DLGAP5,CKAP5,KIF4A,ZNF2…
GO: Biological Process	GO:0006259	DNA metabolic process		4.145e-34	2.498e-30	3.569e-31	3.313e-30	165	992	BRIP1,ERCC6,RNF168,STUB1,SMC1A,MCM2,MCM4,MCM6,ACTL6A,EYA3,MCM10,RRM1,RRM2,TRRAP,ESCO1,LIN9,ZRANB3,FANCD2,FANCB,RMI1,UBR5,UCHL5,MKI67,TAOK1,ZSWIM7,RNF138,MPG,MRE11,RNF169,SMARCA5,XRN2,SFPQ,USP28,PARG,DTL,APAF1,BEND3,GINS4,MSH2,FANCM,MBD3,RAD51AP1,SETD2,CTCF,ATF7IP,PPP4R2,MCM9,PAXIP1,KDM2A,ATF1,POLD3,KDM1B,TNKS2,CLSPN,POLQ,FIGNL1,GEN1,STAG2,DHX36,SMG1,NCOA6,ATR,MCM8,BARD1,NBN,SRPK1,SMC5,GFER,DMAP1,…
GO: Biological Process	GO:0000819	sister chromatid segregation		2.891e-33	1.742e-29	2.178e-30	2.022e-29	72	225	KIF18A,STAG1,SMC1A,ESCO1,TAOK1,MRE11,SFPQ,NAA50,STIL,SMC2,CTCF,CENPI,NUP133,RACGAP1,MTBP,GEN1,STAG2,VPS4A,SMC5,CENPK,CHMP2A,RCC2,NEK2,BUB1,BUB1B,PDS5A,NUP160,NUP98,PRC1,NCAPH,LATS1,SMC3,KIF4B,CDC6,ZW10,TOP2A,TPR,CENPE,CENPF,TTK,DSCC1,NIPBL,KIF23,AHCTF1,VPS4B,CENPO,XPO1,CSNK2A1,ESPL1,KNTC1,INCENP,ERCC6L,CENPL,DLGAP5,CKAP5,KIF4A,ZNF207,NUF2,NCAPD2,KIF14,KIF2A,KPNB1,RAD21,RANBP2,ZWILCH,CHMP6,NUP107,…
GO: Biological Process	GO:0098813	nuclear chromosome segregation		1.407e-32	8.481e-29	9.424e-30	8.747e-29	80	283	KIF18A,STAG1,SMC1A,ESCO1,FANCD2,TAOK1,MRE11,SFPQ,NAA50,STIL,SMC2,FANCM,CTCF,CENPI,NUP133,RACGAP1,MTBP,GEN1,STAG2,VPS4A,SMC5,CENPK,CHMP2A,RCC2,NEK2,BRCA2,BUB1,BUB1B,PDS5A,NUP160,NUP98,PRC1,NCAPH,LATS1,SMC3,KIF4B,CDC6,ZW10,TOP2A,TPR,CENPE,CENPF,TRIP13,TTK,DSCC1,NIPBL,KIF23,AHCTF1,VPS4B,CENPO,XPO1,CSNK2A1,ESPL1,KNTC1,INCENP,ERCC6L,CENPL,DLGAP5,CKAP5,KIF4A,ZNF207,NUF2,NCAPD2,KIF14,FAM83D,KIF2A,KPNB1,…
GO: Biological Process	GO:0018205	peptidyl-lysine modification		2.536e-32	1.529e-28	1.529e-29	1.419e-28	99	426	NCOA3,RNF168,STAG1,SMC1A,ACTL6A,TRRAP,NUP54,PHC3,WDR75,RGPD3,NCOA2,MTF2,HAT1,BEND3,CAMK1,NAA50,PIAS1,MBD3,YEATS2,SETD2,NOP58,CTCF,EPC1,PAXIP1,NUP133,TAF5L,STAG2,MYB,NUP50,SP3,ARID4B,ASH1L,BLOC1S1,SMC5,DMAP1,NUP205,BLM,BRCA1,BRCA2,TAF1,TAF5,MAP3K7,NUP160,NSMCE1,NUP98,NSD1,TDG,SIRT3,NFATC2IP,SMC3,BAZ2A,NUP188,SUZ12,TOP1,TOP2A,HDAC2,WBP2,TPR,RPS6KA5,PARK7,GTF3C4,PHF1,SENP1,TOLLIP,CDYL,TAF1L,KDM6A,GN…
GO: Cellular Component	GO:0005694	chromosome		4.234e-40	3.501e-37	3.501e-37	2.554e-36	169	941	NCOA3,KIF18A,RNF168,STAG1,SMC1A,ETV3,MCM2,MCM4,MCM6,ACTL6A,MCM10,ARID1A,TRRAP,ESCO1,ZRANB3,FANCD2,UCHL5,MKI67,ZNHIT1,RNF138,MRE11,RNF169,SMARCA5,SFPQ,PARG,DTL,PHF6,HAT1,BEND3,GINS4,MSH2,SMC2,MBD3,SETD2,CTCF,CENPI,NUP133,SMARCC1,MTBP,ZFR,KDM2A,POLD3,TNKS2,CLSPN,POLQ,FIGNL1,PLK4,STAG2,DHX36,SP1,ATR,RRP1B,ZC3H8,PPP1R12A,ASH1L,NBN,SMC5,CENPK,RCC2,WDR43,DMAP1,HELB,BLM,NEK2,BRCA1,BRCA2,BUB1,BUB1B,PRPF4…
GO: Cellular Component	GO:0044451	nucleoplasm part		4.689e-38	3.878e-35	1.939e-35	1.415e-34	143	732	SRRM1,ERCC6,LSG1,SMNDC1,ETV3,ACTL6A,RREB1,ADAR,TRRAP,RSRC1,ARL6IP4,FANCB,WDR75,INTS2,ATXN7,PIP5K1A,MRE11,TTF2,SFPQ,FYTTD1,MTF2,GINS4,CHD8,FANCM,SKIL,CWC22,INTS8,PIAS1,PRPF40A,MBD3,YEATS2,NOP58,CDK13,EPC1,PAXIP1,TAF5L,SON,TGS1,NCOA6,SP3,EDF1,ATR,CDK12,ZC3H8,NBN,RAD54L2,SMC5,DMAP1,BLM,PSME4,FASTK,AEBP2,TAF1,TAF2,TAF4,TAF4B,CPSF2,TAF5,MAP3K7,MGA,NPAT,TCEA2,NUDT21,CPSF6,NOC3L,TOPBP1,NSD1,TDG,PATL1,PO…
GO: Cellular Component	GO:0044427	chromosomal part		5.879e-33	4.862e-30	1.621e-30	1.182e-29	146	839	NCOA3,KIF18A,RNF168,STAG1,SMC1A,ETV3,MCM2,MCM4,MCM6,ACTL6A,MCM10,ARID1A,TRRAP,ESCO1,ZRANB3,UCHL5,MKI67,ZNHIT1,RNF138,MRE11,RNF169,SMARCA5,SFPQ,PARG,PHF6,HAT1,BEND3,GINS4,MSH2,SMC2,MBD3,CTCF,CENPI,NUP133,SMARCC1,MTBP,KDM2A,POLD3,TNKS2,STAG2,DHX36,SP1,ATR,RRP1B,ZC3H8,PPP1R12A,NBN,SMC5,CENPK,RCC2,WDR43,DMAP1,HELB,BLM,NEK2,BRCA2,BUB1,BUB1B,PDS5A,TIMELESS,NUP160,NSMCE1,UBR2,SMCHD1,NUP98,BAZ1B,NCAPH,MS…
GO: Cellular Component	GO:1902494	catalytic complex		4.152e-25	3.434e-22	8.584e-23	6.262e-22	154	1077	RNF168,STUB1,ACTL6A,RRM1,RRM2,TRRAP,PIK3R4,PHC3,PPP1R2P3,NAA25,WDR75,INTS2,ATXN7,UCHL5,DCAF17,POLR1B,FBXO45,DYRK2,CUL2,NAA15,MTF2,DTL,FBXW4,CHD8,POMT1,NAA50,SKP2,INTS8,MBD3,YEATS2,CDK13,PPP4R2,EPC1,PAXIP1,TAF5L,POLD3,NCOA6,EDF1,CAND1,CDK12,PPP1R12A,BARD1,NDUFA1,NDUFA2,NDUFA3,NDUFA7,NDUFA8,NDUFB1,NDUFB2,NDUFB7,NDUFB8,CCNK,NDUFB10,NDUFC1,NDUFS3,NDUFV1,NDUFS8,DMAP1,HELB,STRN,BRCA1,POP1,BUB1B,AEBP2,T…
GO: Cellular Component	GO:0098687	chromosomal region		6.581e-24	5.442e-21	1.088e-21	7.941e-21	76	344	KIF18A,STAG1,SMC1A,MCM2,MCM4,MCM6,MKI67,MRE11,PHF6,HAT1,MSH2,CTCF,CENPI,NUP133,MTBP,TNKS2,STAG2,DHX36,ATR,PPP1R12A,NBN,SMC5,CENPK,RCC2,WDR43,BLM,NEK2,BRCA2,BUB1,BUB1B,PDS5A,NUP160,NSMCE1,SMCHD1,NUP98,BAZ1B,WDHD1,SMC3,CDK1,ZW10,HELLS,TPR,CENPE,CENPF,DSCC1,AHCTF1,POLR2B,WRN,CENPO,SIN3A,DCLRE1B,XPO1,PRKDC,KNTC1,INCENP,ERCC6L,CENPL,ZNF207,NUF2,NCAPD2,CDC73,DNA2,DNMT1,DNMT3B,RAD21,ZWILCH,NUP107,SMC6,T…
GO: Cellular Component	GO:0005730	nucleolus		5.313e-22	4.394e-19	7.323e-20	5.343e-19	130	891	MRPL23,ERCC6,ACADVL,MCM10,RREB1,ADAR,ARL6IP4,FANCD2,WDR75,UTP15,ATXN7,MKI67,DCAF17,POLR1B,CUL2,SMARCA5,XRN2,USP28,DTL,ARFGEF1,PHF6,UTP23,BEND3,G2E3,SMC2,SKP2,DIS3,MBD3,ESF1,NOP58,CTCF,KDM2A,EIF3A,PLK4,STAG2,TGS1,EDF1,RRP1B,CDK12,ZC3H15,NBN,SRP72,NEDD1,RCC2,WDR43,BLM,WDR3,NEK2,MDN1,TCERG1,DDX18,POP1,HINT2,UTP20,TIMELESS,TAF4B,TAF5,SPTY2D1,DDX52,TAF1B,TAF1A,NOC3L,KRR1,CCNT1,SF3B3,BAZ2A,PAFAH1B2,CLE…
GO: Cellular Component	GO:0000775	chromosome, centromeric region		6.619e-21	5.474e-18	7.819e-19	5.705e-18	51	185	KIF18A,STAG1,SMC1A,MKI67,PHF6,CTCF,CENPI,NUP133,MTBP,STAG2,PPP1R12A,CENPK,RCC2,WDR43,NEK2,BUB1,BUB1B,PDS5A,NUP160,NUP98,BAZ1B,WDHD1,SMC3,ZW10,HELLS,TPR,CENPE,CENPF,DSCC1,AHCTF1,CENPO,SIN3A,XPO1,KNTC1,INCENP,ERCC6L,CENPL,ZNF207,NUF2,NCAPD2,DNMT1,DNMT3B,RAD21,ZWILCH,NUP107,CDCA8,SUV39H2,ESCO2,PBRM1,SKA3,MAD2L1
GO: Cellular Component	GO:1990234	transferase complex		1.218e-20	1.007e-17	1.259e-18	9.187e-18	111	722	RNF168,STUB1,ACTL6A,TRRAP,PIK3R4,PHC3,NAA25,WDR75,INTS2,ATXN7,DCAF17,POLR1B,FBXO45,DYRK2,CUL2,NAA15,MTF2,DTL,FBXW4,CHD8,POMT1,NAA50,SKP2,INTS8,YEATS2,CDK13,EPC1,PAXIP1,TAF5L,POLD3,NCOA6,EDF1,CAND1,CDK12,BARD1,CCNK,DMAP1,HELB,BRCA1,BUB1B,AEBP2,TAF1,TAF2,TAF4,TAF4B,TAF5,MAP3K7,MGA,UBR2,NSD1,POLR3A,STT3B,CCNF,CCNT1,CCNT2,GTF2A1,DCUN1D1,GTF2H3,SUZ12,HDAC2,CDK8,MED14,DPM3,CHML,RPRD1B,PHF1,NAA35,ANAPC1…
GO: Cellular Component	GO:0016604	nuclear body		2.219e-17	1.835e-14	2.039e-15	1.488e-14	68	364	SRRM1,LSG1,SMNDC1,RREB1,ADAR,RSRC1,ARL6IP4,PIP5K1A,MRE11,SFPQ,FYTTD1,SKIL,CWC22,PIAS1,PRPF40A,NOP58,CDK13,SON,TGS1,SP3,ATR,CDK12,ZC3H8,NBN,RAD54L2,SMC5,BLM,PSME4,FASTK,NPAT,NUDT21,CPSF6,NOC3L,TOPBP1,TDG,PATL1,THAP7,SF3B1,DDX20,MORC3,NOLC1,PARK7,PPIG,RBM25,UBN1,RBM27,PIN1,TOLLIP,RBM15,XPO1,CSTF2,BCLAF1,MAML1,ZMYM2,DDX3X,DDX46,DKC1,CASP8AP2,SMC6,GPATCH2,THOC2,RFWD3,HIPK3,RNF2,RNF6,SENP2,TOPORS,MTDH
GO: Cellular Component	GO:0005819	spindle		9.304e-16	7.695e-13	7.695e-14	5.614e-13	59	308	KIF18A,BIRC6,YEATS2,TPX2,FAM96B,RACGAP1,SPAST,VPS4A,TUBGCP4,NEDD1,RCC2,NEK2,BUB1B,TOPBP1,PRC1,LATS1,SMC3,CKAP2L,CDK1,CDC6,ZW10,TPR,CENPE,CENPF,TTK,ASPM,ROCK2,VRK1,KIF23,VPS4B,BRCC3,KIF20B,ESPL1,KNTC1,HAUS6,INCENP,DLGAP5,CKAP5,KIF4A,ZNF207,CEP350,FBXO5,ALMS1,KIF15,KIF14,FAM83D,KIF2A,KIF11,ECT2,CDCA8,TBL1XR1,NUBP2,KIF20A,TBCCD1,RIF1,CKAP2,SKA3,TOPORS,MAD2L1
Human Phenotype	HP:0000252	Microcephaly		1.021e-11	2.943e-08	2.943e-08	2.515e-07	91	766	CLPP,BRIP1,ERCC6,RNF168,SMC1A,MCM4,RREB1,ARID1A,ADAR,FANCD2,FANCB,ARID1B,RNASEH2C,MRE11,ARFGEF2,PHF6,POMT1,STIL,FANCM,SETD2,CTCF,CDK13,OTUD6B,CEP152,SPATA5,YME1L1,PLK4,CENPJ,ATR,NBN,TUBGCP4,BLM,BRCA1,BRCA2,BUB1,BUB1B,TAF1,TAF2,NSD1,BAZ1B,SIL1,STT3B,AP4E1,GTF2I,SMC3,PPP1R15B,CKAP2L,CDC6,CENPE,LEMD3,TRIP13,HNRNPU,RAB3GAP2,ASPM,PEX16,TXN2,KDM6A,NIPBL,VRK2,POLR1A,IARS,MPDU1,B3GALNT2,SIN3A,XRCC2,CSNK2…
Human Phenotype	HP:0000486	Strabismus		8.602e-10	2.48e-06	1.24e-06	1.059e-05	76	637	BRIP1,ERCC6,SMC1A,RREB1,ARID1A,FANCD2,FANCB,ARID1B,ARFGEF1,POMT1,FANCM,SETD2,CTCF,CDK13,CEP152,SPATA5,YME1L1,PLK4,SON,CENPJ,ATR,NDUFA1,NDUFA2,TUBGCP4,NDUFB10,NDUFS3,NDUFV1,NDUFS8,BRCA1,BRAF,BRCA2,SURF1,TAF1,MAP3K7,NRAS,NSD1,BAZ1B,ADNP,OPA1,SIL1,GTF2I,SMC3,SUZ12,LEMD3,COPB2,HNRNPU,PEX16,KDM6A,NIPBL,MPDU1,B3GALNT2,NDUFAF3,SIN3A,XRCC2,NDUFA11,NDUFS7,KIAA0586,ALMS1,DKC1,AMMECR1,RAD21,KRAS,RASA2,RALGA…
Human Phenotype	HP:0008872	Feeding difficulties in infancy		1.698e-09	4.896e-06	1.632e-06	1.394e-05	49	332	ERCC6,SMC1A,RREB1,ARID1A,ARID1B,ADNP2,PHF6,SETD2,SMPD1,NDUFA1,NDUFB10,NDUFS3,NDUFV1,NDUFS8,BRAF,BUB1,BUB1B,MAP3K7,NRAS,NSD1,BAZ1B,OPA1,GTF2I,SMC3,SUZ12,MMAB,TRIP13,RAB3GAP2,PEX16,UQCRB,KDM6A,NIPBL,VRK1,POLR1A,NDUFAF3,SIN3A,NDUFA11,NDUFS7,KIAA0586,RAD21,KRAS,RASA2,TBL1XR1,NDUFA13,NDUFAF1,SETD5,ARID2,ASXL2,VPS13B
Human Phenotype	HP:0001249	Intellectual disability		2.675e-09	7.712e-06	1.653e-06	1.413e-05	124	1305	DGCR6,BRIP1,ERCC6,SMC1A,ARID1A,ADAR,FANCD2,FANCB,ARID1B,DCAF17,MRE11,FLVCR1,ARFGEF2,ARFGEF1,PHF6,CHD8,ST3GAL3,POMT1,STIL,FANCM,SLC30A6,SETD2,CTCF,CDK13,SMPD1,UQCRQ,CEP152,SPATA5,YME1L1,PLK4,SON,CENPJ,SPAST,ATR,GAMT,NAGLU,NBN,NDUFA2,TUBGCP4,NDUFS3,NDUFS8,NEK2,BRCA1,BRAF,BRCA2,SURF1,BUB1,POP1,BUB1B,TAF1,TAF2,MAP3K7,NRAS,DDX52,NSD1,BAZ1B,ADNP,OPA1,SIL1,STT3B,WDR45,GTF2I,SMC3,CKAP2L,SUZ12,CDC6,HELLS,…
Human Phenotype	HP:0000340	Sloping forehead		2.867e-09	8.266e-06	1.653e-06	1.413e-05	25	108	BRIP1,ERCC6,FANCD2,FANCB,STIL,FANCM,CEP152,PLK4,CENPJ,ATR,NBN,TUBGCP4,BRCA2,BUB1,BUB1B,CENPE,TRIP13,ASPM,XRCC2,CEP135,KIF14,KIF11,PALB2,FANCI,SASS6
Human Phenotype	HP:0003220	Abnormality of chromosome stability		4.092e-09	1.18e-05	1.96e-06	1.674e-05	16	46	BRIP1,FANCD2,FANCB,FANCM,PMVK,NBN,BLM,BRCA2,HELLS,WRN,XRCC2,ZBTB24,DNMT3B,PALB2,CDCA7,FANCI
Human Phenotype	HP:0010880	Increased nuchal translucency		4.758e-09	1.372e-05	1.96e-06	1.674e-05	14	35	SMC1A,BRAF,BUB1,BUB1B,NRAS,BAZ1B,GTF2I,SMC3,TRIP13,NIPBL,RAD21,KRAS,RASA2,SETD5
Human Phenotype	HP:0001511	Intrauterine growth retardation		2.721e-08	7.845e-05	9.806e-06	8.378e-05	54	417	BRIP1,ERCC6,SMC1A,MCM4,RREB1,ARID1A,FANCD2,FANCB,ARID1B,FANCM,OTUD6B,CEP152,PLK4,CENPJ,ATR,NBN,TUBGCP4,BLM,BRAF,BRCA2,BUB1,BUB1B,TAF1,NSD1,BAZ1B,TFAM,STT3B,GTF2I,SMC3,PPP1R15B,CKAP2L,CDC6,CENPE,LEMD3,TRIP13,RAB3GAP2,NIPBL,IARS,SIN3A,XRCC2,PRKDC,DKC1,KIF14,KIF2A,RAD21,NUP107,PALB2,ESCO2,CDCA7,SETD5,COQ4,FANCI,ARID2,VPS13B
Human Phenotype	HP:0000028	Cryptorchidism		3.797e-08	0.0001095	1.038e-05	8.868e-05	66	565	BRIP1,ERCC6,SMC1A,RREB1,ARID1A,BRWD3,FANCD2,FANCB,ARID1B,PHF6,POMT1,FANCM,SETD2,CTCF,OTUD6B,CEP152,CENPJ,ATR,BLM,BRCA1,BRAF,BRCA2,BUB1,BUB1B,MAP3K7,NRAS,DDX52,SMCHD1,NSD1,BAZ1B,DICER1,STT3B,GTF2I,SMC3,PPP1R15B,CKAP2L,SUZ12,CDC6,B4GALT7,TRIP13,RAB3GAP2,PEX16,KDM6A,NIPBL,VRK2,B3GALNT2,SIN3A,XRCC2,DDX3X,LRIG2,DKC1,RAD21,KRAS,NUP107,RASA2,RALGAPB,REST,PALB2,ESCO2,CDCA7,SETD5,VANGL1,FANCI,ARID2,RLIM,V…
Human Phenotype	HP:0001257	Spasticity		3.889e-08	0.0001121	1.038e-05	8.868e-05	65	553	ERCC6,STUB1,SMC1A,ADAR,ATXN7,SCN1B,RNASEH2C,MRE11,MSH2,POMT1,SMPD1,SPATA5,PLK4,GAMT,NDUFA1,NDUFA2,TUBGCP4,NDUFB10,NDUFS3,NDUFV1,NDUFS8,BRAF,SURF1,TAF2,C21orf2,MARS2,BAZ1B,OPA1,SIL1,POLR3A,CCNF,MSH6,GTF2I,SMC3,PPP1R15B,SUZ12,C19orf70,RAB3GAP2,PEX16,UQCRB,TXN2,NIPBL,VRK2,IARS,MPDU1,B3GALNT2,NDUFAF3,NDUFA11,NDUFS7,DDX3X,DKC1,QDPR,KIF11,DNMT1,RAD21,KRAS,RANBP2,HUWE1,TBL1XR1,DARS2,NDUFA13,NDUFAF1,LMNB…
Mouse Phenotype	MP:0008762	embryonic lethality		1.479e-44	6.849e-41	6.849e-41	6.176e-40	259	1766	EPRS,KIF18A,STAG1,MCM4,ACTL6A,MCM10,ECSIT,RRM1,ARID1A,RRM2,ADAM10,ADAR,TRRAP,BIRC6,LIN9,FANCD2,PIK3R4,BPTF,RMI1,UBR5,CDIPT,NAF1,RGPD3,MIB1,POLR1B,MRE11,SMARCA5,TRA2B,FLVCR1,PARG,DTL,ARFGEF2,WDR83,GINS4,CHD8,G2E3,POMT1,STIL,TXNRD2,CHORDC1,USP37,SMC2,SKIL,MBD3,ELOF1,GADD45GIP1,MFN1,TRIM33,SETD2,CCDC94,CTCF,C1orf112,MCM9,TPX2,NUP133,RACGAP1,SMARCC1,DDRGK1,MTBP,ZFR,KDM2A,ATF1,DAAM1,POLD3,TNKS2,SPATA5…
Mouse Phenotype	MP:0013292	embryonic lethality prior to organogenesis		1.001e-23	4.637e-20	2.319e-20	2.091e-19	121	721	EPRS,MCM4,MCM10,RRM1,ARID1A,RRM2,ADAR,TRRAP,LIN9,BPTF,CDIPT,NAF1,SMARCA5,PARG,DTL,ARFGEF2,GINS4,G2E3,SKIL,MBD3,ELOF1,GADD45GIP1,TRIM33,CCDC94,CTCF,C1orf112,NUP133,RACGAP1,SMARCC1,MTBP,ZFR,ATF1,POLD3,SPATA5,PLK4,TGS1,DHX36,SMG1,ATP6V0A1,CENPJ,ATR,PPRC1,CDK12,PPP1R12A,GART,BARD1,NBN,NR6A1,CCNK,DMAP1,BRCA1,BRAF,BRCA2,BUB1,BUB1B,TIMELESS,MGA,GPX4,TOPBP1,ADNP,DICER1,CCNA2,CCNT2,SF3B1,SUDS3,NARFL,PPP1R…
Mouse Phenotype	MP:0013293	embryonic lethality prior to tooth bud stage		2.406e-23	1.114e-19	3.714e-20	3.349e-19	128	797	EPRS,MCM4,MCM10,RRM1,ARID1A,RRM2,ADAR,TRRAP,LIN9,BPTF,CDIPT,NAF1,SMARCA5,PARG,DTL,ARFGEF2,GINS4,G2E3,SKIL,MBD3,ELOF1,GADD45GIP1,TRIM33,CCDC94,CTCF,C1orf112,NUP133,RACGAP1,SMARCC1,MTBP,ZFR,ATF1,DAAM1,POLD3,SPATA5,PLK4,MYB,TGS1,DHX36,SMG1,ATP6V0A1,CENPJ,ATR,PPRC1,CDK12,PPP1R12A,GART,BARD1,NBN,NR6A1,CCNK,DMAP1,BRCA1,BRAF,BRCA2,BUB1,BUB1B,TIMELESS,MGA,GPX4,TOPBP1,ADNP,DICER1,CCNA2,CCNT2,SF3B1,SUDS3,N…
Mouse Phenotype	MP:0005380	embryo phenotype		5.87e-23	2.719e-19	6.796e-20	6.129e-19	213	1754	CLPP,EPRS,NCOA3,MCM2,MCM4,MCM10,ECSIT,ARID1A,ADAM10,ADAR,TRRAP,BIRC6,LIN9,BRWD3,BPTF,UBR5,UCHL5,MIB1,POLR1B,NCOA2,MRE11,SMARCA5,TRA2B,PARG,APAF1,FBXW4,WDR83,GINS4,CHD8,POMT1,STIL,CHORDC1,SKIL,GADD45GIP1,MFN1,TRIM33,SETD2,CTCF,MTF1,MCM9,TPX2,NUP133,RACGAP1,SMARCC1,DDRGK1,ZFR,KDM2A,ATF1,CEP152,DAAM1,TNKS2,PLK4,MYB,TGS1,SMG1,NUP50,SP1,SP3,CENPJ,ATR,PPRC1,CDK12,MTHFD2,VPS4A,RSF1,ASH1L,BARD1,NBN,NR6A1…
Mouse Phenotype	MP:0003077	abnormal cell cycle		1.407e-18	6.515e-15	1.132e-15	1.021e-14	67	316	KIF18A,RNF168,STAG1,SMC1A,MCM2,MCM4,BIRC6,LIN9,RGPD3,MRE11,HAT1,MSH2,SMC2,FANCM,MCM9,TPX2,PLK4,TGS1,DHX36,CENPJ,ATR,NBN,SMC5,BLM,BRCA1,BRCA2,BUB1,BUB1B,NFYA,PDS5A,GPX1,TOPBP1,NCAPH,DICER1,CCNA2,CCNF,LATS1,SUDS3,UHMK1,MASTL,TMPO,CDK1,HDAC2,TPP2,CENPE,TMOD3,CHD1,CIRBP,ASPM,WEE1,MED1,KIF20B,ESPL1,B3GAT3,DDX3X,FBXO5,DIAPH3,DNA2,KRAS,KDM5A,RECQL,REL,E2F3,CDCA8,ESCO2,RIF1,MAD2L1
Mouse Phenotype	MP:0014134	abnormal embryo morphology		1.467e-18	6.793e-15	1.132e-15	1.021e-14	169	1361	EPRS,NCOA3,MCM2,MCM4,MCM10,ECSIT,ARID1A,ADAM10,ADAR,TRRAP,LIN9,BRWD3,BPTF,UBR5,MIB1,POLR1B,SMARCA5,TRA2B,APAF1,FBXW4,CHD8,STIL,GADD45GIP1,MFN1,TRIM33,SETD2,CTCF,MTF1,MCM9,NUP133,RACGAP1,SMARCC1,DDRGK1,ZFR,KDM2A,ATF1,CEP152,DAAM1,TNKS2,PLK4,TGS1,SMG1,NUP50,SP1,CENPJ,PPRC1,CDK12,MTHFD2,VPS4A,RSF1,BARD1,NBN,NR6A1,RAD54L2,BLM,STK4,BRCA1,BRAF,BRCA2,SURF1,BUB1B,ADAM17,MGA,NPAT,UBR2,SMCHD1,NOC3L,GPX4,NU…
Mouse Phenotype	MP:0001672	abnormal embryo development		5.816e-17	2.693e-13	3.848e-14	3.47e-13	134	1007	MCM4,MCM10,ECSIT,ARID1A,ADAR,LIN9,BRWD3,BPTF,UBR5,UCHL5,MIB1,MRE11,SMARCA5,PARG,CHD8,POMT1,STIL,SKIL,GADD45GIP1,MFN1,TRIM33,SETD2,CTCF,MTF1,MCM9,TPX2,NUP133,RACGAP1,ZFR,KDM2A,ATF1,PLK4,TGS1,SMG1,CENPJ,PPRC1,BARD1,NR6A1,RAD54L2,BLM,STK4,BRCA1,BRAF,BRCA2,BUB1B,PDS5A,UBR2,NRAS,NOC3L,GPX4,NUP98,TOPBP1,NSD1,BTAF1,TDG,ATE1,DICER1,OPA1,TFDP1,CCNA2,TFRC,CCNF,GTF2I,CCNE2,PAK2,DDX20,CDK1,SUZ12,PDCD10,XPOT,…
Mouse Phenotype	MP:0004196	abnormal prenatal growth/weight/body size		3.341e-16	1.547e-12	1.855e-13	1.673e-12	145	1153	EPRS,NCOA3,MCM4,ECSIT,ARID1A,ADAM10,ADAR,BIRC6,BRWD3,FANCD2,BPTF,UBR5,UCHL5,MIB1,TRA2B,STIL,GADD45GIP1,MFN1,TRIM33,SETD2,MTF1,OTUD6B,MCM9,NUP133,DDRGK1,ZFR,KDM2A,DAAM1,TNKS2,PLK4,TGS1,SMG1,NUP50,SP1,SP3,CENPJ,MTHFD2,VPS4A,RSF1,BARD1,NBN,NR6A1,RAD54L2,BLM,STK4,BRCA1,BRAF,BRCA2,FUBP1,SURF1,BUB1,BUB1B,PDS5A,ADAM17,NPAT,UBR2,NRAS,GPX4,NUP98,BAZ1B,BTAF1,TDG,DICER1,OPA1,TFDP1,TFRC,CCNF,GTF2I,CCNE2,PPP1…
Mouse Phenotype	MP:0008866	chromosomal instability		3.605e-16	1.67e-12	1.855e-13	1.673e-12	36	114	BRIP1,RNF168,ATAD5,SMC1A,MCM2,MCM4,MCM6,FANCD2,MRE11,USP28,MCM9,POLQ,CENPJ,ATR,MCM8,CDK12,BARD1,NBN,BLM,BRCA1,BRCA2,BUB1,BUB1B,EXO1,HDAC2,CENPE,USP1,KDM6A,XRCC2,RAD18,DNA2,KRAS,RECQL,PALB2,RPS27L,MAD2L1
Mouse Phenotype	MP:0010094	abnormal chromosome stability		6.722e-16	3.113e-12	3.113e-13	2.807e-12	36	116	BRIP1,RNF168,ATAD5,SMC1A,MCM2,MCM4,MCM6,FANCD2,MRE11,USP28,MCM9,POLQ,CENPJ,ATR,MCM8,CDK12,BARD1,NBN,BLM,BRCA1,BRCA2,BUB1,BUB1B,EXO1,HDAC2,CENPE,USP1,KDM6A,XRCC2,RAD18,DNA2,KRAS,RECQL,PALB2,RPS27L,MAD2L1
Domain	IPR016024	ARM-type_fold	InterPro	5.872e-17	2.532e-13	2.532e-13	2.265e-12	65	340	STAG1,ARID1A,TRRAP,PIK3R4,XPO5,IPO7,ARFGEF2,ARFGEF1,API5,CWC22,SCYL2,DAAM1,STAG2,SMG1,CAND1,ATR,NCBP1,PSME4,PDS5A,UTP20,TAF2,NOC3L,USP24,XPO4,PUM2,BTAF1,SIL1,AP4E1,SF3B1,NUP188,TNPO3,XPOT,KPNA6,TRIP12,PIK3CA,ASPM,HEATR5B,NIPBL,ARMC8,INTS7,XPO1,PPP2R5E,CSE1L,UPF2,IQCB1,PRKDC,PUM1,USP34,NBEAL1,CKAP5,NCAPG2,NCAPD2,DIAPH3,KPNB1,KPNA2,KPNA3,KPNA4,HEATR1,HUWE1,RSPRY1,ARMC1,RIF1,CEBPZ,ARID2,EIF4G2
Domain	IPR011989	ARM-like	InterPro	1.049e-15	4.524e-12	2.262e-12	2.024e-11	55	271	STAG1,ARID1A,TRRAP,PIK3R4,ARID1B,XPO5,IPO7,ARFGEF2,ARFGEF1,API5,ATAD2,SCYL2,DAAM1,STAG2,SMG1,CAND1,ATR,PSME4,PDS5A,UTP20,NOC3L,XPO4,PUM2,BTAF1,SIL1,AP4E1,SF3B1,TNPO3,XPOT,KPNA6,TRIP12,ASPM,HEATR5B,NIPBL,ARMC8,INTS7,XPO1,PPP2R5E,CSE1L,IQCB1,PRKDC,PUM1,CKAP5,NCAPG2,NCAPD2,KPNB1,KPNA2,KPNA3,KPNA4,HEATR1,HUWE1,RSPRY1,ARMC1,RIF1,ARID2
Domain	SM00487	DEXDc	SMART	2.452e-14	1.057e-10	2.662e-11	2.381e-10	32	109	BRIP1,ERCC6,ZRANB3,TTF2,SMARCA5,CHD8,FANCM,POLQ,DHX36,RAD54L2,BLM,DDX18,ASCC3,DDX52,BTAF1,DICER1,DDX20,DDX21,HELLS,CHD1,RAD54B,SHPRH,WRN,ERCC6L,SMARCAD1,DHX33,DDX3X,DHX8,DHX9,DHX15,DDX46,RECQL
Domain	1.25.10.10	-	Gene3D	2.469e-14	1.065e-10	2.662e-11	2.381e-10	47	222	ARID1A,TRRAP,PIK3R4,ARID1B,XPO5,IPO7,ARFGEF2,ARFGEF1,API5,ATAD2,SCYL2,DAAM1,CAND1,ATR,PSME4,PDS5A,UTP20,XPO4,PUM2,BTAF1,SIL1,AP4E1,SF3B1,TNPO3,XPOT,KPNA6,TRIP12,ASPM,HEATR5B,NIPBL,ARMC8,INTS7,XPO1,PPP2R5E,CSE1L,PRKDC,PUM1,CKAP5,NCAPG2,NCAPD2,KPNB1,KPNA2,KPNA3,KPNA4,HEATR1,ARMC1,RIF1
Domain	IPR014001	Helicase_ATP-bd	InterPro	3.261e-14	1.406e-10	2.812e-11	2.516e-10	32	110	BRIP1,ERCC6,ZRANB3,TTF2,SMARCA5,CHD8,FANCM,POLQ,DHX36,RAD54L2,BLM,DDX18,ASCC3,DDX52,BTAF1,DICER1,DDX20,DDX21,HELLS,CHD1,RAD54B,SHPRH,WRN,ERCC6L,SMARCAD1,DHX33,DDX3X,DHX8,DHX9,DHX15,DDX46,RECQL
Domain	PF00271	Helicase_C	Pfam	9.287e-14	4.005e-10	5.721e-11	5.118e-10	31	107	ERCC6,ZRANB3,TTF2,SMARCA5,CHD8,FANCM,POLQ,DHX36,RAD54L2,BLM,DDX18,ASCC3,DDX52,BTAF1,DICER1,DDX20,DDX21,HELLS,CHD1,RAD54B,SHPRH,WRN,ERCC6L,SMARCAD1,DHX33,DDX3X,DHX8,DHX9,DHX15,DDX46,RECQL
Domain	SM00490	HELICc	SMART	9.287e-14	4.005e-10	5.721e-11	5.118e-10	31	107	ERCC6,ZRANB3,TTF2,SMARCA5,CHD8,FANCM,POLQ,DHX36,RAD54L2,BLM,DDX18,ASCC3,DDX52,BTAF1,DICER1,DDX20,DDX21,HELLS,CHD1,RAD54B,SHPRH,WRN,ERCC6L,SMARCAD1,DHX33,DDX3X,DHX8,DHX9,DHX15,DDX46,RECQL
Domain	IPR001650	Helicase_C	InterPro	1.229e-13	5.298e-10	6.623e-11	5.925e-10	31	108	ERCC6,ZRANB3,TTF2,SMARCA5,CHD8,FANCM,POLQ,DHX36,RAD54L2,BLM,DDX18,ASCC3,DDX52,BTAF1,DICER1,DDX20,DDX21,HELLS,CHD1,RAD54B,SHPRH,WRN,ERCC6L,SMARCAD1,DHX33,DDX3X,DHX8,DHX9,DHX15,DDX46,RECQL
Domain	PS51194	HELICASE_CTER	PROSITE	1.62e-13	6.984e-10	6.984e-11	6.248e-10	31	109	ERCC6,ZRANB3,TTF2,SMARCA5,CHD8,FANCM,POLQ,DHX36,RAD54L2,BLM,DDX18,ASCC3,DDX52,BTAF1,DICER1,DDX20,DDX21,HELLS,CHD1,RAD54B,SHPRH,WRN,ERCC6L,SMARCAD1,DHX33,DDX3X,DHX8,DHX9,DHX15,DDX46,RECQL
Domain	PS51192	HELICASE_ATP_BIND_1	PROSITE	1.62e-13	6.984e-10	6.984e-11	6.248e-10	31	109	ERCC6,ZRANB3,TTF2,SMARCA5,CHD8,FANCM,POLQ,DHX36,RAD54L2,BLM,DDX18,ASCC3,DDX52,BTAF1,DICER1,DDX20,DDX21,HELLS,CHD1,RAD54B,SHPRH,WRN,ERCC6L,SMARCAD1,DHX33,DDX3X,DHX8,DHX9,DHX15,DDX46,RECQL
Pathway	1269741	Cell Cycle	BioSystems: REACTOME	8.551e-36	1.742e-32	1.742e-32	1.428e-31	130	624	KIF18A,BRIP1,RNF168,STAG1,SMC1A,MCM2,MCM4,MCM6,CEP76,MCM10,RRM2,ESCO1,LIN9,NUP54,RMI1,CEP78,TAOK1,MRE11,SMARCA5,GINS4,SMC2,BLZF1,SKP2,CENPI,TPX2,NUP133,CEP152,POLD3,CLSPN,PLK4,STAG2,NUP50,CENPJ,ATR,MCM8,PPP1R12A,RSF1,BARD1,NBN,TUBGCP4,NEDD1,CENPK,RCC2,NUP205,BLM,NEK2,PSME4,BRCA1,BRCA2,DBF4,BUB1,BUB1B,PDS5A,NUP160,NUP98,TOPBP1,NCAPH,TFDP1,CCNA2,SMC3,TK2,CCNE2,MASTL,EXO1,TMPO,CDK1,NUP188,CDC6,ZW10,…
Pathway	1269763	Cell Cycle, Mitotic	BioSystems: REACTOME	1.065e-31	2.17e-28	1.085e-28	8.893e-28	111	517	KIF18A,STAG1,SMC1A,MCM2,MCM4,MCM6,CEP76,MCM10,RRM2,ESCO1,LIN9,NUP54,CEP78,TAOK1,GINS4,SMC2,BLZF1,SKP2,CENPI,TPX2,NUP133,CEP152,POLD3,PLK4,STAG2,NUP50,CENPJ,MCM8,PPP1R12A,TUBGCP4,NEDD1,CENPK,RCC2,NUP205,NEK2,PSME4,DBF4,BUB1,BUB1B,PDS5A,NUP160,NUP98,NCAPH,TFDP1,CCNA2,SMC3,TK2,CCNE2,MASTL,TMPO,CDK1,NUP188,CDC6,ZW10,TOP2A,TPR,CENPE,CENPF,LEMD3,HMMR,ANAPC1,NIPBL,VRK1,VRK2,KIF23,WEE1,POLA1,POLE2,AHCTF1…
Pathway	1269649	Gene Expression	BioSystems: REACTOME	1.143e-25	2.329e-22	7.762e-23	6.362e-22	227	1844	EPRS,SRRM1,BRIP1,ERCC6,SMNDC1,ZNF267,ZNF699,ADAR,ZNF551,NUP54,CNOT6,FANCD2,RMI1,FAU,WDR75,INTS2,UTP15,XPO5,POLR1B,DYRK2,NCOA2,MRE11,SMARCA5,XRN2,FYTTD1,TRA2B,MTF2,APAF1,MSH2,SKIL,ATAD2,CWC22,INTS8,PABPC1,PRPF40A,DIS3,MBD3,TRIM33,ZNF430,NOP58,SNRNP48,CDK13,TPX2,NUP133,CCAR1,EIF3A,CNOT1,DCP1A,TGS1,BDP1,SMG1,NUP50,SP1,KDM5B,NCOA6,CENPJ,ARID4B,ATR,ZNF460,CDK12,ZC3H8,BARD1,NBN,SRP72,NCBP1,NR6A1,CCNK,W…
Pathway	1269820	Mitotic Prometaphase	BioSystems: REACTOME	1.675e-21	3.412e-18	8.53e-19	6.991e-18	41	111	KIF18A,STAG1,SMC1A,TAOK1,SMC2,CENPI,NUP133,STAG2,CENPK,RCC2,BUB1,BUB1B,PDS5A,NUP160,NUP98,NCAPH,SMC3,CDK1,ZW10,CENPE,CENPF,AHCTF1,CENPO,XPO1,PPP2R5E,CSNK2A1,KNTC1,INCENP,ERCC6L,CENPL,CKAP5,NUF2,NCAPD2,KIF2A,RAD21,RANBP2,ZWILCH,NUP107,SMC4,CDCA8,MAD2L1
Pathway	1269810	M Phase	BioSystems: REACTOME	3.883e-18	7.91e-15	1.39e-15	1.139e-14	65	311	KIF18A,STAG1,SMC1A,NUP54,TAOK1,SMC2,BLZF1,CENPI,NUP133,STAG2,NUP50,CENPK,RCC2,NUP205,PSME4,BUB1,BUB1B,PDS5A,NUP160,NUP98,NCAPH,SMC3,MASTL,TMPO,CDK1,NUP188,ZW10,TPR,CENPE,CENPF,LEMD3,ANAPC1,NIPBL,VRK1,VRK2,KIF23,AHCTF1,CENPO,XPO1,PPP2R5E,NUP155,CSNK2A1,ESPL1,KNTC1,INCENP,ERCC6L,CENPL,CKAP5,NUF2,PSMD12,NUP58,NCAPG2,FBXO5,NCAPD2,KIF2A,NUP153,RAD21,RANBP2,ZWILCH,NUP107,SMC4,CDCA8,KIF20A,LMNB1,MAD2L1
Pathway	1269821	Resolution of Sister Chromatid Cohesion	BioSystems: REACTOME	4.095e-18	8.341e-15	1.39e-15	1.139e-14	36	103	KIF18A,STAG1,SMC1A,TAOK1,CENPI,NUP133,STAG2,CENPK,RCC2,BUB1,BUB1B,PDS5A,NUP160,NUP98,SMC3,CDK1,ZW10,CENPE,CENPF,AHCTF1,CENPO,XPO1,PPP2R5E,KNTC1,INCENP,ERCC6L,CENPL,CKAP5,NUF2,KIF2A,RAD21,RANBP2,ZWILCH,NUP107,CDCA8,MAD2L1
Pathway	1268738	SUMOylation	BioSystems: REACTOME	6.1e-18	1.243e-14	1.775e-15	1.455e-14	37	110	RNF168,STAG1,SMC1A,NUP54,PHC3,PIAS1,NOP58,NUP133,STAG2,NUP50,SP3,SMC5,NUP205,BLM,BRCA1,NUP160,NSMCE1,NUP98,TDG,SMC3,NUP188,TOP1,TOP2A,TPR,SENP1,WRN,NUP155,INCENP,NUP58,NUP153,RAD21,RANBP2,NUP107,SMC6,CDCA8,RNF2,SENP2
Pathway	1268743	SUMO E3 ligases SUMOylate target proteins	BioSystems: REACTOME	4.762e-17	9.7e-14	1.212e-14	9.938e-14	35	104	RNF168,STAG1,SMC1A,NUP54,PHC3,PIAS1,NOP58,NUP133,STAG2,NUP50,SP3,SMC5,NUP205,BLM,BRCA1,NUP160,NSMCE1,NUP98,TDG,SMC3,NUP188,TOP1,TOP2A,TPR,WRN,NUP155,INCENP,NUP58,NUP153,RAD21,RANBP2,NUP107,SMC6,CDCA8,RNF2
Pathway	1269823	Mitotic Metaphase and Anaphase	BioSystems: REACTOME	9.514e-16	1.938e-12	2.153e-13	1.765e-12	45	182	KIF18A,STAG1,SMC1A,TAOK1,CENPI,NUP133,STAG2,CENPK,RCC2,PSME4,BUB1,BUB1B,PDS5A,NUP160,NUP98,SMC3,TMPO,ZW10,CENPE,CENPF,LEMD3,ANAPC1,VRK1,VRK2,AHCTF1,CENPO,XPO1,PPP2R5E,ESPL1,KNTC1,INCENP,ERCC6L,CENPL,CKAP5,NUF2,PSMD12,FBXO5,KIF2A,RAD21,RANBP2,ZWILCH,NUP107,CDCA8,LMNB1,MAD2L1
Pathway	1268744	SUMOylation of DNA damage response and repair proteins	BioSystems: REACTOME	1.134e-15	2.31e-12	2.31e-13	1.893e-12	29	78	RNF168,STAG1,SMC1A,NUP54,PHC3,PIAS1,NUP133,STAG2,NUP50,SMC5,NUP205,BLM,BRCA1,NUP160,NSMCE1,NUP98,TDG,SMC3,NUP188,TPR,WRN,NUP155,NUP58,NUP153,RAD21,RANBP2,NUP107,SMC6,RNF2
Pubmed	25921289	Temporal proteomics of NGF-TrkA signaling identifies an inhibitory role for the E3 ligase Cbl-b in neuroblastoma cell differentiation.	Pubmed	3.186e-150	1.59e-145	1.59e-145	1.811e-144	281	1922	EPRS,SRRM1,ACADVL,LSG1,SMC1A,ETFB,FAM91A1,MCM2,MCM4,MCM6,ACTL6A,MCM10,RRM1,RRM2,ADAR,RSRC1,NUP54,FANCD2,PIK3R4,NAA25,XPO5,UCHL5,MIB1,POLR1B,TAOK1,SLC25A11,SYNCRIP,VCPIP1,CUL2,MRE11,SMARCA5,XRN2,SFPQ,NAA15,IPO7,TRA2B,PARG,ARFGEF1,PHF6,HAT1,BEND3,MRPL28,VTA1,MSH2,C7orf50,API5,SMC2,CWC22,PABPC1,PRPF40A,DIS3,MFN1,SCYL2,TRIM33,NOP58,CDK13,NUP133,CCAR1,SMARCC1,EIF3A,SPATA5,YME1L1,CNOT1,FIGNL1,TXLNG,STA…
Pubmed	17081983	Global, in vivo, and site-specific phosphorylation dynamics in signaling networks.	Pubmed	6.364e-127	3.176e-122	1.588e-122	1.809e-121	234	1546	SRRM1,MAN2C1,STUB1,ZNF267,FAM91A1,MCM2,MCM4,ACTL6A,ARID1A,ADAR,LIN9,BRWD3,BPTF,RMI1,PHC3,WDR75,USP42,UBR5,TEX264,NUFIP2,MKI67,TAOK1,NCOA2,MRE11,RNF169,SMARCA5,XRN2,SFPQ,NAA15,TRA2B,SGTA,APAF1,ANKRD26,ARFGEF2,ARFGEF1,LMTK2,PHF6,HAT1,CHD8,API5,USP37,ATAD2,SKP2,INTS8,PIAS1,PRPF40A,ESF1,SETD2,NOP58,CCDC94,CTCF,CDK13,N4BP2,ATF7IP,TPX2,NUP133,CCAR1,RACGAP1,SMARCC1,KDM2A,POLD3,PRR11,CLSPN,SPEN,TXLNG,STA…
Pubmed	22586326	Functional proteomics establishes the interaction of SIRT7 with chromatin remodeling complexes and expands its role in regulation of RNA polymerase I transcription.	Pubmed	5.1e-112	2.545e-107	8.483e-108	9.667e-107	154	653	SRRM1,MCM4,MCM6,ARID1A,TRRAP,BIRC6,BPTF,WDR75,UBR5,UTP15,XPO5,NUFIP2,MKI67,SYNCRIP,MRE11,SMARCA5,XRN2,SFPQ,NAA15,IPO7,BEND3,CHD8,MSH2,ATAD2,PABPC1,PRPF40A,DIS3,ESF1,NOP58,CTCF,NUP133,CCAR1,SMARCC1,ZFR,ZBTB11,SPEN,CNOT1,STAG2,SON,DHX36,RRP1B,GART,RSF1,SRP72,SRPK1,NCBP1,RCC2,WDR43,IQGAP1,NUP205,BLM,GMPS,WDR3,MDN1,DDX18,POP1,PRPF4B,PDS5A,UTP20,ASCC3,NUP160,CAD,TCF20,DDX52,SMCHD1,NOC3L,USP24,NUP98,NS…
Pubmed	15302935	Large-scale characterization of HeLa cell nuclear phosphoproteins.	Pubmed	3.729e-108	1.861e-103	4.652e-104	5.301e-103	161	773	EPRS,NCOA3,SRRM1,BRIP1,STUB1,SMC1A,FAM91A1,MCM2,MCM4,RREB1,TRRAP,ZNF551,FANCD2,BPTF,PHC3,USP42,ATXN7,ZNF644,NAF1,MKI67,TAOK1,VCPIP1,MPG,MRE11,RNF169,SMARCA5,XRN2,SGTA,PARG,ZNF507,ARFGEF2,ATAD2,PRPF40A,ESF1,YEATS2,SETD2,CDK13,TPX2,CCAR1,SMARCC1,SPEN,STAG2,DCP1A,SON,SP1,NCOA6,RAPGEF6,ARID4B,ATR,CDK12,NBN,GPATCH8,CCNK,IQGAP1,BLM,MDN1,BRAF,PAPOLA,DBF4,FUBP1,POP1,PRPF4B,UTP20,TIMELESS,CPSF2,TCF20,USP2…
Pubmed	26638075	A Dynamic Protein Interaction Landscape of the Human Centrosome-Cilium Interface.	Pubmed	8.46e-106	4.222e-101	8.443e-102	9.621e-101	228	1820	ZNF326,STUB1,LSG1,ETFB,FAM91A1,MCM2,CEP76,MCM10,RRM1,TMEM222,RRM2,BIRC6,NUP54,ARID1B,XPO5,TEX264,RGPD3,NUFIP2,MIB1,ZNHIT1,FKBP2,VCPIP1,NCOA2,MRE11,TTF2,NAA15,IPO7,TRA2B,FLVCR1,ZNF280C,ANKRD26,WDR83,CHD8,MSH2,STIL,SMC2,BLZF1,SLC30A6,SCYL2,YEATS2,NOP58,N4BP2,NUP133,CCAR1,RACGAP1,DDRGK1,CEP152,CHID1,SPEN,SPATA5,CNOT1,GEN1,TXLNG,DEPDC1B,PLK4,NUP50,ATP6V0A1,RAPGEF6,CAND1,CENPJ,RBM12B,USE1,ZC3H15,PPP1R…
Pubmed	24711643	Identifying biological pathways that underlie primordial short stature using network analysis.	Pubmed	1.643e-93	8.198e-89	1.366e-89	1.557e-88	166	1024	EPRS,SRRM1,ZNF326,ACADVL,SMC1A,ETFB,MCM2,MCM4,MCM6,ADAR,TRRAP,NUP54,BPTF,WDR75,UBR5,MKI67,SYNCRIP,MRE11,SMARCA5,XRN2,SFPQ,IPO7,TRA2B,MSH2,SMC2,PABPC1,PRPF40A,GADD45GIP1,NOP58,NUP133,RACGAP1,ZFR,EIF3A,SPEN,CNOT1,STAG2,SON,CAND1,RRP1B,RBM12B,GART,NCBP1,RCC2,NDUFS3,WDR43,IQGAP1,NUP205,WDR3,RAB10,MDN1,FUBP1,DDX18,PRPF4B,HINT2,UTP20,ASCC3,CPSF2,MGA,NUP160,GPD2,CAD,TCF20,NUDT21,CPSF6,DDX52,SMCHD1,CAPZA…
Pubmed	20360068	Systematic analysis of human protein complexes identifies chromosome segregation proteins.	Pubmed	3.643e-92	1.818e-87	2.597e-88	2.959e-87	185	1341	ZNF326,STAG1,SMC1A,ACTL6A,CEP76,ARID1A,ESCO1,LIN9,RSRC1,CNOT6,FANCB,RMI1,ARID1B,FAU,CEP78,UBR5,ZNF644,MIB1,MKI67,SYNCRIP,SFPQ,NAA15,TRA2B,DTL,NAA50,CHORDC1,SKP2,CWC22,PABPC1,NOP58,CTCF,RBAK,TPX2,NUP133,CCAR1,RACGAP1,SMARCC1,ZFR,CEP152,EIF3A,CNOT1,STAG2,TGS1,NUP50,ZNF460,PPP1R12A,MRPL43,TUBGCP4,NEDD1,SMC5,WDR43,IQGAP1,BLM,STK4,RTKN2,NEK2,STRN,RCOR1,FBXO28,BUB1,POP1,BUB1B,PDS5A,TIMELESS,ATL2,NUP160…
Pubmed	19322201	Ubiquitin-mediated proteolysis of HuR by heat shock.	Pubmed	6.221e-86	3.104e-81	3.598e-82	4.1e-81	197	1672	NCOA3,SRRM1,SMNDC1,MCM4,ARID1A,RRM2,ADAR,RYK,MEX3C,CNOT6,FANCD2,NAA25,AES,CRLF3,NUFIP2,RNF138,SFPQ,ZBTB2,MTF2,CTDSPL2,USP28,APAF1,ADNP2,VTA1,DEPDC1,API5,SKP2,PABPC1,MBD3,FAM49B,AZIN1,TRIM33,MSRB2,SETD2,SNRNP48,CELF1,OTUD6B,PAXIP1,SMARCC1,ZFR,KDM2A,SMPD1,TAF5L,SMG1,KDM5B,SPAST,RRP1B,CDK12,MTHFD2,PPP1R12A,GART,BARD1,SRPK1,MYNN,CCNK,SPIN4,RCC2,STK4,RAB10,STRN,UBXN4,PAPOLA,FUBP1,DDX18,AEBP2,TAF2,TAF4…
Pubmed	25281560	Proximity biotinylation and affinity purification are complementary approaches for the interactome mapping of chromatin-associated protein complexes.	Pubmed	6.489e-86	3.238e-81	3.598e-82	4.1e-81	130	636	SRRM1,KIF18A,C21orf33,ATAD5,FAM91A1,CEP76,MCM10,WDR76,LIN9,ARL6IP4,NUFIP2,MIB1,PIP5K1A,VCPIP1,MPG,NCOA2,RNF169,TRA2B,PARG,ANKRD26,PHF6,HAT1,ATAD2,RAD51AP1,CCDC94,EPC1,TPX2,PAXIP1,CCAR1,RACGAP1,KDM2A,CEP152,KDM1B,SPEN,CNOT1,LCOR,TXLNG,EDF1,ARID4B,ZC3H15,PPP1R12A,TTLL5,RSF1,BARD1,NBN,NCBP1,RCC2,RAB10,RCOR1,BRCA1,BUB1B,MAP3K7,SMCHD1,TOPBP1,PRC1,CCNA2,GTF3C2,NFATC2IP,FAM50A,ZFP91,SUPT16H,SUZ12,MORC3,…
Pubmed	25609649	Proteomic analyses reveal distinct chromatin-associated and soluble transcription factor complexes.	Pubmed	1.946e-85	9.709e-81	9.709e-82	1.106e-80	146	852	ZNF326,STAG1,SMC1A,MCM4,MCM6,ACTL6A,ADAR,TRRAP,LIN9,BPTF,UBR5,ZNF644,NCOA2,MRE11,TTF2,SMARCA5,ZBTB2,KIF27,USP28,PARG,BEND3,DEPDC1,SMC2,SKIL,SKP2,MXD4,GADD45GIP1,TRIM33,EPC1,TPX2,NUP133,SMARCC1,ZFR,KDM2A,ATF1,TAF5L,KDM1B,SPEN,STAG2,DCP1A,ARID4B,PPP1R12A,RBM26,MTMR1,NDUFV1,DMAP1,NUP205,BLM,MDN1,TCERG1,POP1,NFYA,PDS5A,UTP20,CPSF2,MGA,NUP160,UBR2,TMED1,NRAS,DDX52,NUP98,BTAF1,PRC1,ADNP,NCAPH,TFDP1,SF3…
Interaction	int:SIRT7	SIRT7 interactions		6.482e-45	7.126e-41	7.126e-41	7.042e-40	153	665	SRRM1,MCM4,MCM6,ARID1A,TRRAP,BIRC6,BPTF,WDR75,UBR5,UTP15,XPO5,NUFIP2,MKI67,SYNCRIP,MRE11,XRN2,SFPQ,NAA15,IPO7,BEND3,CHD8,MSH2,ATAD2,PABPC1,PRPF40A,DIS3,ESF1,NOP58,CTCF,NUP133,CCAR1,SMARCC1,ZFR,ZBTB11,SPEN,CNOT1,STAG2,SON,DHX36,RRP1B,GART,RSF1,SRP72,SRPK1,NCBP1,RCC2,WDR43,IQGAP1,NUP205,BLM,GMPS,WDR3,MDN1,DDX18,POP1,PRPF4B,PDS5A,UTP20,ASCC3,NUP160,CAD,TCF20,DDX52,SMCHD1,NOC3L,USP24,NUP98,NSD1,BAZ1B…
Interaction	int:NTRK1	NTRK1 interactions		9.306e-41	1.023e-36	5.115e-37	5.055e-36	283	1956	EPRS,SRRM1,ACADVL,LSG1,SMC1A,ETFB,FAM91A1,MCM2,MCM4,MCM6,ACTL6A,MCM10,RRM1,RRM2,ADAR,RSRC1,NUP54,FANCD2,PIK3R4,NAA25,XPO5,UCHL5,MIB1,POLR1B,TAOK1,SLC25A11,SYNCRIP,VCPIP1,CUL2,MRE11,SMARCA5,XRN2,SFPQ,NAA15,IPO7,TRA2B,PARG,ARFGEF1,PHF6,HAT1,BEND3,MRPL28,VTA1,MSH2,C7orf50,API5,SMC2,CWC22,PABPC1,PRPF40A,DIS3,MFN1,SCYL2,TRIM33,NOP58,CDK13,NUP133,CCAR1,SMARCC1,EIF3A,SPATA5,YME1L1,CNOT1,FIGNL1,TXLNG,STA…
Interaction	int:EED	EED interactions		1.215e-38	1.336e-34	4.453e-35	4.401e-34	216	1316	EPRS,ZNF326,STAG1,SMC1A,MCM2,MCM4,MCM6,RRM1,ARID1A,ADAR,TRRAP,BIRC6,FANCD2,BPTF,PHC3,NAA25,XPO5,CDIPT,RGPD3,SLC25A11,SYNCRIP,CUL2,MRE11,SMARCA5,XRN2,SFPQ,FYTTD1,NAA15,IPO7,TRA2B,MTF2,MSH2,API5,SMC2,ATAD2,CWC22,INTS8,PABPC1,PRPF40A,DIS3,NOP58,PMVK,CTCF,EPC1,NUP133,CCAR1,SMARCC1,ZFR,KDM2A,UQCRQ,EIF3A,SPEN,CNOT1,LCOR,STAG2,SON,TGS1,DHX36,ATP6V0A1,CAND1,RRP1B,RBM12B,GART,NAPA,NCBP1,NDUFA8,SMC5,CHMP2A…
Interaction	int:SNW1	SNW1 interactions		1.024e-30	1.126e-26	2.816e-27	2.783e-26	115	536	SRRM1,ZNF326,STAG1,SMC1A,ARID1A,PIK3R4,UBR5,UCHL5,TAOK1,SYNCRIP,NCOA2,CUL2,MRE11,SMARCA5,XRN2,SFPQ,FYTTD1,KIF27,ARFGEF2,WDR83,CHD8,MSH2,API5,SKIL,PABPC1,PRPF40A,SCYL2,CCDC94,RACGAP1,SPATA5,CNOT1,CAND1,ATR,CDK12,NBN,SRP72,NCBP1,IQGAP1,BLM,MDN1,FUBP1,BUB1,BUB1B,CPSF2,TCEA2,CPSF6,SMCHD1,CAPZA1,BTAF1,NCAPH,GSPT1,CCNT1,MSH6,SF3B3,SF3B1,SMC3,TMPO,CDK1,SUZ12,TOP1,HDAC2,HELLS,GTPBP4,TRIP13,TRIP12,TTK,HNR…
Interaction	int:MYC	MYC interactions		4.54e-29	4.992e-25	9.983e-26	9.866e-25	128	668	NCOA3,KIF18A,STUB1,ETV3,ACTL6A,ECSIT,ADAR,TRRAP,FANCD2,XPO5,SLC25A11,SMARCA5,IPO7,USP28,ARFGEF2,MSH2,USP37,SMC2,ATAD2,SKP2,EPC1,NUP133,SMARCC1,ATP5D,SP1,KDM5B,SP3,CDK12,NDUFA8,CCNK,NDUFB10,NDUFS3,DMAP1,NUP205,NEK2,PSME4,BRCA1,FUBP1,DDX18,PDS5A,TAF1,UBR2,CAD,DDX52,TAF1B,TAF1A,NUCB1,TDG,PRC1,ADNP,TFAM,OPA1,GSK3B,CCNT1,MSH6,GTF2I,LATS1,SF3B1,GTF3C2,PAK2,TMPO,DDX20,CDK1,CDC6,ZNF281,TOP1,TOP2A,HDAC2,X…
Interaction	int:NANOG	NANOG interactions		2.099e-27	2.308e-23	3.846e-24	3.801e-23	102	474	ZNF326,STUB1,STAG1,MCM2,ARID1A,TRRAP,BPTF,ARID1B,USP42,UCHL5,RGPD3,NUFIP2,MRE11,SMARCA5,ZBTB2,FBXW4,MSH2,NAA50,PABPC1,MBD3,TRIM33,YEATS2,NOP58,TPX2,PAXIP1,ZFR,CNOT1,SP1,EDF1,NBN,GPATCH8,RCC2,NDUFS3,DMAP1,MDN1,BRCA1,BRCA2,MGA,TCF20,CAPZA1,XPO4,PUM2,PRC1,MSH6,SMC3,SUPT16H,DDX20,SUZ12,ZNF281,TOP2A,HDAC2,HELLS,TPP2,GTPBP4,CENPF,LEMD3,TRAPPC5,TRIP12,GTF3C4,GTF3C3,CIRBP,SINHCAF,PIN1,GNL3L,AHCTF1,POLR2B…
Interaction	int:RPA1	RPA1 interactions		2.471e-25	2.716e-21	3.88e-22	3.835e-21	99	477	EPRS,BRIP1,ERCC6,SMC1A,MCM2,MCM4,MCM6,ADAR,RMI1,POLR1B,SYNCRIP,DYRK2,MPG,MRE11,SMARCA5,XRN2,SFPQ,MSH2,C7orf50,USP37,SMC2,FANCM,PABPC1,PRPF40A,CELF1,TPX2,PAXIP1,ZFR,DHX36,ATR,PPP1R12A,RBM26,NAPA,NBN,IQGAP1,HELB,BLM,WDR3,RAB10,BRCA1,BRCA2,TCERG1,FUBP1,PDS5A,TIMELESS,TCEA2,NUDT21,CAPZA1,TOPBP1,TFAM,CCNA2,TFRC,GTF2H3,GTF2I,SF3B3,SF3B1,GTF3C2,WDHD1,SMC3,TMPO,CDK1,TOP2A,RPS6KA5,PFDN5,TRIP12,HNRNPU,RPRD…
Interaction	int:POU5F1	POU5F1 interactions		3.094e-24	3.402e-20	4.252e-21	4.202e-20	108	569	SMC1A,ACTL6A,ARID1A,TRRAP,FANCD2,BPTF,ARID1B,USP42,UBR5,TAOK1,MRE11,TTF2,SMARCA5,ZBTB2,TRA2B,MSH2,API5,NAA50,MBD3,TRIM33,YEATS2,NOP58,PAXIP1,SMARCC1,CNOT1,SP1,ATR,NBN,TUBGCP4,NDUFS3,TCERG1,PRPF4B,TAF1,CPSF2,MGA,CAD,TCF20,CPSF6,SMCHD1,MSH6,GTF2E1,GTF2I,GTF3C2,SMC3,SUDS3,SUPT16H,TMPO,DDX20,CDK1,SUZ12,ZNF281,TOP1,TOP2A,HDAC2,HELLS,TPP2,TPR,LEMD3,TRAPPC5,CHD1,TRIP13,GTF3C4,GTF3C3,HNRNPU,SINHCAF,RBM27…
Interaction	int:FOXP3	FOXP3 interactions		3.336e-23	3.667e-19	4.075e-20	4.027e-19	88	416	ZNF326,STUB1,ATAD5,ETV3,MCM10,ARID1A,RRM2,WDR76,ADAR,BPTF,WDR75,UTP15,RGPD3,SMARCA5,IKZF3,FYTTD1,BEND3,CHD8,SMC2,NUP133,SMARCC1,ZFR,DHX36,ATR,SRP72,DMAP1,IQGAP1,GMPS,WDR3,RCOR1,FBXO28,PRPF4B,TAF1,NUP160,CAD,SMCHD1,TOPBP1,GSK3B,GSPT1,MSH6,GTF2E1,GTF3C2,SMC3,BAZ1A,SUZ12,TOP1,HDAC2,GTPBP4,PARK7,COPB2,FAM98B,PPIG,UBP1,ARIH1,INO80E,RBM15,WDR36,AHCTF1,YY1,KIF20B,CSE1L,NUP155,RPS19BP1,ZNF148,BCLAF1,CKAP…
Interaction	int:CDC5L	CDC5L interactions		6.294e-23	6.92e-19	6.92e-20	6.839e-19	108	590	SRRM1,SMC1A,MCM4,MCM10,ARID1A,FANCD2,XPO5,UCHL5,MRE11,TTF2,SMARCA5,XRN2,SFPQ,IPO7,WDR83,CHD8,MSH2,API5,SMC2,INTS8,SCYL2,CCDC94,TPX2,PAXIP1,RACGAP1,SPATA5,CNOT1,STAG2,SON,CAND1,ATR,NBN,SRP72,TUBGCP4,IQGAP1,GMPS,MDN1,BUB1,BUB1B,PRPF4B,CPSF2,NUDT21,SMCHD1,CAPZA1,USP24,BTAF1,NCAPH,MSH6,SF3B3,SF3B1,SMC3,TMPO,DDX21,TOP1,TOP2A,HELLS,NOLC1,TPR,COPB2,TMOD3,TRIP13,HNRNPU,UBN1,ANAPC1,ANLN,NIPBL,ROCK2,WRN,YW…
Cytoband	2q21.3	2q21.3		8.735e-05	0.0545	0.03409	0.2391	5	15	ZRANB3,MGAT5,UBXN4,CCNT2,R3HDM1
Cytoband	19p13.2	19p13.2		0.000112	0.0699	0.03409	0.2391	20	235	ZNF699,ECSIT,TMEM205,FDX1L,WDR83,ELOF1,GADD45GIP1,NDUFA7,TMED1,PEX11G,KANK3,TRAPPC5,CCDC159,ZNF358,ZNF791,ZNF426,ZNF562,DHPS,DNMT1,NDUFA13
Cytoband	3q29	3q29		0.0001639	0.1023	0.03409	0.2391	11	89	RNF168,LSG1,FBXO45,FYTTD1,LRCH3,TFRC,PAK2,ACAP2,FAM157A,UBXN7,DLG1
Cytoband	19p13.3	19p13.3		0.0002185	0.1364	0.03409	0.2391	20	247	CLPP,HSD11B1L,AES,ALKBH7,MBD3,CCDC94,ATP5D,GAMT,UQCR11,C19orf25,GPX4,MPND,C19orf70,CIRBP,SHC2,POLR2E,NDUFA11,NDUFS7,MRPL54,QTRT1
Cytoband	3q26.3	3q26.3		0.0003385	0.2112	0.04225	0.2963	3	5	DCUN1D1,PIK3CA,PRKCI
Transcription Factor Binding Site	V$E2F1_Q6	V$E2F1_Q6		7.037e-20	4.236e-17	4.236e-17	2.956e-16	50	181	STAG1,MCM2,MCM4,MCM6,RRM2,FANCD2,SYNCRIP,IPO7,TRA2B,MSH2,USP37,ATAD2,CTCF,POLD3,CLSPN,GEN1,STAG2,SP3,MCM8,PRPF4B,MAP3K7,TOPBP1,ATE1,GSPT1,CCNT1,TMPO,CDK1,CDC6,NOLC1,RPS6KA5,E2F7,POLE2,MRPL40,PRKDC,UGGT1,ARHGAP11A,DCK,STK35,FBXO5,DNMT1,KPNB1,CASP8AP2,RBBP4,RBL1,HMGXB4,E2F3,PBRM1,CDCA7,ASXL2,HNRNPR
Transcription Factor Binding Site	V$E2F_02	V$E2F_02		9.151e-19	5.509e-16	2.754e-16	1.922e-15	49	184	STAG1,MCM2,MCM4,MCM6,RRM2,FANCD2,SYNCRIP,IPO7,TRA2B,MSH2,USP37,ATAD2,POLD3,CLSPN,GEN1,STAG2,SP3,MCM8,NR6A1,PRPF4B,MAP3K7,TOPBP1,GSPT1,CCNT1,TMPO,CDK1,CDC6,NOLC1,RPS6KA5,E2F7,PPIG,POLE2,MRPL40,PRKDC,MAPK6,UGGT1,ARHGAP11A,DCK,STK35,FBXO5,DNMT1,CASP8AP2,RBL1,HMGXB4,E2F3,PBRM1,CDCA7,ASXL2,HNRNPR
Transcription Factor Binding Site	V$E2F4DP1_01	V$E2F4DP1_01		1.736e-17	1.045e-14	2.24e-15	1.563e-14	48	189	STAG1,MCM2,MCM4,MCM6,RRM2,FANCD2,SYNCRIP,IPO7,TRA2B,MSH2,USP37,ATAD2,POLD3,CLSPN,GEN1,STAG2,SP3,MCM8,PRPF4B,MAP3K7,TOPBP1,GSPT1,CCNT1,TMPO,CDK1,CDC6,NOLC1,RPS6KA5,E2F7,POLE2,PAPOLG,MRPL40,PRKDC,MAPK6,UGGT1,ARHGAP11A,DCK,STK35,FBXO5,DNMT1,CASP8AP2,RBL1,HMGXB4,E2F3,PBRM1,CDCA7,ASXL2,HNRNPR
Transcription Factor Binding Site	V$E2F_Q6	V$E2F_Q6		1.854e-17	1.116e-14	2.24e-15	1.563e-14	47	182	STAG1,MCM2,MCM4,MCM6,RRM2,FANCD2,IPO7,TRA2B,MSH2,USP37,ATAD2,CTCF,POLD3,CLSPN,GEN1,STAG2,SP3,MCM8,PRPF4B,TOPBP1,GSPT1,CCNT1,TMPO,CDK1,CDC6,NOLC1,RPS6KA5,E2F7,WEE1,POLE2,MRPL40,PRKDC,UGGT1,ARHGAP11A,DCK,STK35,FBXO5,NUP153,DNMT1,KPNB1,CASP8AP2,RBL1,HMGXB4,E2F3,PBRM1,CDCA7,ASXL2
Transcription Factor Binding Site	V$E2F4DP2_01	V$E2F4DP2_01		2.976e-17	1.792e-14	2.24e-15	1.563e-14	47	184	STAG1,MCM2,MCM4,MCM6,RRM2,FANCD2,SYNCRIP,IPO7,TRA2B,MSH2,USP37,ATAD2,POLD3,CLSPN,GEN1,SP3,MCM8,NR6A1,PRPF4B,MAP3K7,TOPBP1,GSPT1,CCNT1,TMPO,CDK1,CDC6,NOLC1,RPS6KA5,E2F7,PPIG,POLE2,MRPL40,PRKDC,MAPK6,UGGT1,ARHGAP11A,DCK,STK35,FBXO5,DNMT1,CASP8AP2,RBL1,HMGXB4,E2F3,PBRM1,CDCA7,ASXL2
Transcription Factor Binding Site	V$E2F1DP1_01	V$E2F1DP1_01		2.976e-17	1.792e-14	2.24e-15	1.563e-14	47	184	STAG1,MCM2,MCM4,MCM6,RRM2,FANCD2,SYNCRIP,IPO7,TRA2B,MSH2,USP37,ATAD2,POLD3,CLSPN,GEN1,SP3,MCM8,NR6A1,PRPF4B,MAP3K7,TOPBP1,GSPT1,CCNT1,TMPO,CDK1,CDC6,NOLC1,RPS6KA5,E2F7,PPIG,POLE2,MRPL40,PRKDC,MAPK6,UGGT1,ARHGAP11A,DCK,STK35,FBXO5,DNMT1,CASP8AP2,RBL1,HMGXB4,E2F3,PBRM1,CDCA7,ASXL2
Transcription Factor Binding Site	V$E2F1DP2_01	V$E2F1DP2_01		2.976e-17	1.792e-14	2.24e-15	1.563e-14	47	184	STAG1,MCM2,MCM4,MCM6,RRM2,FANCD2,SYNCRIP,IPO7,TRA2B,MSH2,USP37,ATAD2,POLD3,CLSPN,GEN1,SP3,MCM8,NR6A1,PRPF4B,MAP3K7,TOPBP1,GSPT1,CCNT1,TMPO,CDK1,CDC6,NOLC1,RPS6KA5,E2F7,PPIG,POLE2,MRPL40,PRKDC,MAPK6,UGGT1,ARHGAP11A,DCK,STK35,FBXO5,DNMT1,CASP8AP2,RBL1,HMGXB4,E2F3,PBRM1,CDCA7,ASXL2
Transcription Factor Binding Site	V$E2F_Q4	V$E2F_Q4		2.976e-17	1.792e-14	2.24e-15	1.563e-14	47	184	STAG1,MCM2,MCM4,MCM6,RRM2,FANCD2,IPO7,TRA2B,MSH2,USP37,ATAD2,CTCF,EPC1,POLD3,CLSPN,GEN1,STAG2,SP3,MCM8,TOPBP1,GSPT1,CCNT1,TMPO,CDK1,CDC6,NOLC1,RPS6KA5,E2F7,WEE1,POLE2,MRPL40,PRKDC,UGGT1,ARHGAP11A,DCK,STK35,FBXO5,NUP153,DNMT1,KPNB1,CASP8AP2,RBL1,HMGXB4,E2F3,PBRM1,CDCA7,ASXL2
Transcription Factor Binding Site	V$E2F1_Q6_01	V$E2F1_Q6_01		2.528e-15	1.522e-12	1.691e-13	1.18e-12	45	189	STAG1,MCM2,MCM4,MCM6,SYNCRIP,IPO7,MSH2,USP37,ATAD2,CTCF,POLD3,CLSPN,GEN1,STAG2,ATP5G2,SP1,NCOA6,MCM8,PPRC1,NCBP1,NPAT,TOPBP1,CASP2,ATE1,GSPT1,CCNT1,TMPO,NOLC1,WEE1,POLE2,SIN3A,MRPL40,PRKDC,ESPL1,RB1CC1,ARHGAP11A,STK35,FBXO5,DNMT1,CASP8AP2,RBL1,E2F3,CDCA7,ASXL2,HNRNPR
Transcription Factor Binding Site	V$E2F_Q3_01	V$E2F_Q3_01		3.298e-14	1.986e-11	1.986e-12	1.386e-11	43	186	STAG1,MCM2,MCM4,MCM6,PIK3R4,IPO7,ATAD2,PIAS1,GEN1,STAG2,ATP5G2,SMG1,NCOA6,MCM8,PPRC1,TOPBP1,CASP2,ATE1,CDK1,CDC6,TOP1,RPS6KA5,E2F7,USP1,WEE1,POLE2,SIN3A,NDUFA11,NUP155,PRKDC,NHLRC2,ARHGAP11A,DCK,STK35,MELK,FBXO5,NUP153,DNMT1,KPNB1,CASP8AP2,E2F3,CDCA7,ASXL2
Gene Family	1051	Nucleoporins	genenames.org	4.191e-12	1.24e-09	1.24e-09	7.776e-09	14	32	NUP54,NUP133,NUP50,NUP205,NUP160,NUP98,NUP188,TPR,AHCTF1,NUP155,NUP58,NUP153,RANBP2,NUP107
Gene Family	1150	NADH:ubiquinone oxidoreductase supernumerary subunits	genenames.org	2.883e-11	8.533e-09	3.633e-09	2.277e-08	13	30	NDUFA1,NDUFA2,NDUFA3,NDUFA7,NDUFA8,NDUFB1,NDUFB2,NDUFB7,NDUFB8,NDUFB10,NDUFC1,NDUFA11,NDUFA13
Gene Family	28	Zinc fingers C2H2-type|BTB domain containing	genenames.org	3.682e-11	1.09e-08	3.633e-09	2.277e-08	67	720	ZNF326,ZNF267,ZNF699,RREB1,ZNF551,ZNF107,ZBTB2,IKZF3,ZNF507,ADNP2,ZBTB26,ZNF430,CTCF,ZFP64,RBAK,ZBTB11,ZNF292,SP1,SP3,ZBTB6,ZNF460,MYNN,ZSCAN29,ZNF800,ZNF587,ZFP91,ZNF431,SUZ12,ZNF281,HIVEP1,ZNF688,ZNF358,PLAGL2,ZNF81,ZNF791,ZNF426,ZNF567,ZNF670,ZNF428,YY1,ZFX,ZNF28,ZNF121,ZNF124,ZNF131,ZNF765,ZNF845,ZNF143,ZNF146,ZNF148,ZNF562,ZNF678,ZNF184,ZNF207,ZNF217,ZNF318,ZNF236,ZNF623,ZBTB24,PRDM10,ZBTB39…
Gene Family	622	Kinesins|Protein phosphatase 1 regulatory subunits	genenames.org	1.282e-09	3.795e-07	9.489e-08	5.949e-07	14	46	KIF18A,KIF27,KIF4B,CENPE,KIF24,KIF23,KIF20B,KIF4A,KIF15,KIF14,KIF2A,KIF5B,KIF11,KIF20A
Gene Family	88	Zinc fingers C2HC-type|PHD finger proteins|Lysine acetyltransferases	genenames.org	9.889e-09	2.927e-06	5.854e-07	3.67e-06	18	90	BPTF,MTF2,PHF6,G2E3,TRIM33,KDM2A,KDM5B,RSF1,ASH1L,NSD1,BAZ1B,BAZ2A,BAZ1A,PHF1,SHPRH,KDM5A,MLLT10,PHF20L1
Gene Family	548	Fanconi anemia complementation groups	genenames.org	2.306e-08	6.825e-06	9.989e-07	6.263e-06	9	20	BRIP1,FANCD2,FANCB,FANCM,BRCA1,BRCA2,XRCC2,PALB2,FANCI
Gene Family	761	Structural maintenance of chromosomes proteins|SMC5-6 protein complex	genenames.org	2.362e-08	6.993e-06	9.989e-07	6.263e-06	6	7	SMC1A,SMC2,SMC5,SMC3,SMC6,SMC4
Gene Family	413	AAA ATPases	genenames.org	8.82e-08	2.611e-05	3.263e-06	2.046e-05	13	53	CLPP,ATAD5,ATAD2,SPATA5,YME1L1,FIGNL1,SPAST,VPS4A,MDN1,TRIP13,ATAD2B,VPS4B,RFC3
Gene Family	418	AT-rich interaction domain containing	genenames.org	6.611e-07	0.0001957	2.174e-05	0.0001363	7	15	ARID1A,ARID1B,KDM5B,ARID4B,JARID2,KDM5A,ARID2
Gene Family	725	RNA binding motif containing	genenames.org	9.716e-07	0.0002876	2.876e-05	0.0001803	25	213	SYNCRIP,SFPQ,TRA2B,PABPC1,CELF1,SPEN,RBMXL1,RBM12B,PPRC1,RBM26,CPSF6,SNRNP35,PABPC3,UHMK1,CIRBP,RBM25,RBM27,RBM15,PPIL4,CSTF2,NOL8,RBM12,G3BP1,RBM41,HNRNPR
Coexpression	M14427	Genes down-regulated in nasopharyngeal carcinoma (NPC) compared to the normal tissue.	MSigDB C2: CGP Curated Gene Sets (v6.0)	6.931e-105	6.947e-101	6.947e-101	6.801e-100	285	1367	EPRS,KIF18A,BRIP1,SMC1A,ZNF267,MCM2,MCM4,MCM6,MCM10,RRM1,RRM2,ADAR,LIN9,RSRC1,NUP54,NAA25,WDR75,CEP78,XPO5,UCHL5,MKI67,POLR1B,TTF2,SIKE1,ZBTB2,NAA15,TRA2B,MTF2,CTDSPL2,FLVCR1,ZNF280C,DTL,ADNP2,DEPDC1,MSH2,NAA50,SMC2,FANCM,ATAD2,SKP2,INTS8,PRPF40A,FAM49B,SLC30A6,AZIN1,SCYL2,YEATS2,RAD51AP1,NOP58,PLA2G4C,OTUD6B,CENPI,TPX2,PAXIP1,NUP133,CCAR1,RACGAP1,ZFR,CEP152,PRR11,POLQ,FIGNL1,DEPDC1B,PLK4,GABPB1,…
Coexpression	M80	Genes up-regulated in TC71 and EWS502 cells (Ewing's sarcoma) by EWSR1-FLI1 [GeneID=2130;2314] as inferred from RNAi knockdown of this fusion protein.	MSigDB C2: CGP Curated Gene Sets (v6.0)	5.997e-91	6.011e-87	3.006e-87	2.943e-86	258	1276	SRRM1,KIF18A,BRIP1,STAG1,ATAD5,FAM91A1,MCM2,MCM4,MCM6,MCM10,RRM1,RRM2,WDR76,LIN9,ZRANB3,FANCD2,RMI1,ADSS,CEP78,UBR5,XPO5,UCHL5,CRLF3,MIB1,MKI67,ZNF107,RNF138,TTF2,XRN2,SFPQ,IPO7,TRA2B,CTDSPL2,ZNF280C,DTL,ZNF507,GINS4,G2E3,DEPDC1,MSH2,NAA50,CHORDC1,USP37,SMC2,ATAD2,SKP2,PRPF40A,FAM49B,ESF1,RAD51AP1,SNRNP48,CDK13,N4BP2,OTUD6B,C1orf112,TPX2,RACGAP1,SMARCC1,ATF1,CEP152,POLD3,PRR11,POLQ,YME1L1,CNOT1,F…
Coexpression	20937356-TableS2	Rat Hypothalamic_Mansuy10_1931genes	GeneSigDB	1.271e-90	1.274e-86	4.246e-87	4.157e-86	255	1251	EPRS,KIF18A,BRIP1,STAG1,ATAD5,MCM2,MCM6,CEP76,MCM10,RRM2,LIN9,TRIM59,NUP54,FANCD2,NAA25,ADSS,WDR75,UTP15,UCHL5,POLR1B,SYNCRIP,CUL2,SMARCA5,IPO7,TRA2B,DTL,HAT1,GINS4,G2E3,MSH2,STIL,CHORDC1,SMC2,PRPF40A,DIS3,FAM49B,ESF1,AZIN1,RAD51AP1,CUTA,NOP58,OTUD6B,CENPI,TPX2,NUP133,RACGAP1,CEP152,EIF3A,POLD3,PRR11,CLSPN,POLQ,SPATA5,FIGNL1,GEN1,DEPDC1B,PLK4,STAG2,RAPGEF6,UBAP2,MCM8,PPRC1,MTHFD2,ZC3H8,ZC3H15,GAR…
Coexpression	M2241	Genes down-regulated upon overexpression of PARVB [GeneID=29780] in MDA-MB-231 cells (breast cancer) cultured in 3D Matrigel only.	MSigDB C2: CGP Curated Gene Sets (v6.0)	7.707e-78	7.725e-74	1.931e-74	1.891e-73	203	916	KIF18A,BRIP1,SMNDC1,MCM4,MCM6,ACTL6A,CEP76,RREB1,RRM1,ARID1A,RRM2,WDR76,MYSM1,RSRC1,NUP54,FANCD2,RMI1,UTP15,MIB1,TAOK1,RNF138,SYNCRIP,MRE11,SMARCA5,SFPQ,NAA15,TRA2B,MTF2,CTDSPL2,FLVCR1,DTL,PHF6,G2E3,MSH2,NAA50,USP37,SMC2,ATAD2,BLZF1,SKP2,PRPF40A,RAD51AP1,SETD2,NOP58,CELF1,N4BP2,OTUD6B,PPP4R2,CCAR1,RACGAP1,MTBP,POLD3,FIGNL1,DEPDC1B,PLK4,MAP3K2,BDP1,ATP5I,NUP50,RAPGEF6,UBAP2,ATR,MCM8,RBMXL1,MTHFD2,…
Coexpression	M10237	Genes up-regulated in anaplastic thyroid carcinoma (ATC) compared to normal thyroid tissue.	MSigDB C2: CGP Curated Gene Sets (v6.0)	7.265e-77	7.282e-73	1.456e-73	1.426e-72	179	719	EPRS,KIF18A,STAG1,MCM2,MCM4,ACTL6A,ADAM10,LIN9,RSRC1,WDR75,UTP15,ZNF644,FBXO45,MRE11,SIKE1,XRN2,FYTTD1,NAA15,CTDSPL2,ARFGEF2,VTA1,G2E3,DEPDC1,API5,NAA50,STIL,SMC2,ATAD2,BLZF1,CWC22,PRPF40A,MFN1,ESF1,SCYL2,RAD51AP1,PPP4R2,RBAK,TPX2,RACGAP1,PRR11,ZBTB11,CNOT1,FIGNL1,PLK4,GABPB1,DHX36,ATR,MCM8,MTHFD2,GART,RSF1,MTMR1,NBN,SRPK1,NCBP1,RCC2,IQGAP1,STK4,NEK2,STRN,UBXN4,ATP11B,PAPOLA,BRCA2,DBF4,BUB1B,PRPF…
Coexpression	M5611	Genes constituting the BRCA1-PCC network of transcripts whose expression positively correlated (Pearson correlation coefficient, PCC >= 0.4) with that of BRCA1 [GeneID=672] across a compendium of normal tissues.	MSigDB C2: CGP Curated Gene Sets (v6.0)	9.965e-74	9.989e-70	1.665e-70	1.63e-69	270	1651	MRPL23,EPRS,SRRM1,ERCC6,SMNDC1,SMC1A,MCM2,MCM4,MCM6,ACTL6A,RREB1,RRM1,ARID1A,RRM2,ADAM10,RSC1A1,ADSS,UBR5,CRLF3,MKI67,SYNCRIP,CUL2,MRE11,TTF2,SIKE1,SMARCA5,SFPQ,IPO7,TRA2B,MTF2,PARG,ADNP2,ANKRD26,ARFGEF2,HAT1,MSH2,API5,STIL,SMC2,SKP2,PABPC1,PRPF40A,MFN1,AZIN1,RAD51AP1,CTCF,CDK13,CENPI,TPX2,PAXIP1,NUP133,SMARCC1,ZFR,TAF5L,POLD3,YME1L1,CNOT1,PLK4,STAG2,MYB,NUP50,ATR,RRP1B,MTHFD2,ZC3H15,GART,BARD1,N…
Coexpression	M2325	Genes down-regulated in uterus upon knockout of BMP2 [GeneID=650].	MSigDB C2: CGP Curated Gene Sets (v6.0)	7.833e-73	7.852e-69	1.122e-69	1.098e-68	193	882	ATAD5,MCM2,MCM4,MCM6,ACTL6A,CEP76,MCM10,RRM1,RRM2,WDR76,TRIM59,NUP54,FANCB,NAA25,WDR75,UTP15,XPO5,UCHL5,NAF1,POLR1B,RNF138,SYNCRIP,MRE11,TTF2,SMARCA5,SFPQ,NAA15,FLVCR1,DTL,ANKRD26,HAT1,BEND3,DDI2,NAA50,CHORDC1,ATAD2,SKP2,PRPF40A,DIS3,ESF1,AZIN1,RAD51AP1,NOP58,OTUD6B,C1orf112,CENPI,PAXIP1,CLSPN,SPATA5,FIGNL1,PLK4,NUP50,RBMXL1,RRP1B,PPRC1,MTHFD2,ZC3H8,GART,SRPK1,NCBP1,RCC2,WDR43,NUP205,BLM,GMPS,WDR…
Coexpression	M1913	Genes down-regulated in neural stem cells (NSC) at 36 h after cre-lox knockout of TLX (NR2E1) [GeneID=7101].	MSigDB C2: CGP Curated Gene Sets (v6.0)	1.904e-72	1.908e-68	2.385e-69	2.335e-68	94	185	KIF18A,STAG1,MCM4,MCM10,MKI67,SMARCA5,NAA15,DTL,HAT1,DEPDC1,SMC2,DIS3,ESF1,RAD51AP1,TPX2,MTBP,FIGNL1,PLK4,STAG2,ZNF292,TGS1,ASH1L,RBM26,NEDD1,CENPK,BLM,BRCA1,BUB1,PRPF4B,TIMELESS,PRC1,CCNA2,WDHD1,SMC3,MASTL,EXO1,TMPO,SUZ12,TOP2A,TPR,CENPE,CENPF,CHD1,HMMR,TRIP13,TTK,HNRNPU,PNPT1,PPIG,ANLN,USP1,ROCK2,KIF23,POLA1,XPO1,PPAT,UPF2,PRIM1,HAUS6,ZNF148,INCENP,ERCC6L,BCLAF1,CKAP5,ZNF207,SMARCAD1,NCAPG2,GIN…
Coexpression	M2368	Genes up-regulated during later stage of differentiation of Oli-Neu cells (oligodendroglial precursor) in response to PD174265 [PubChem=4709].	MSigDB C2: CGP Curated Gene Sets (v6.0)	1.288e-67	1.291e-63	1.435e-64	1.405e-63	150	570	KIF18A,STUB1,STAG1,ATAD5,MCM2,MCM4,MCM6,MCM10,RRM1,RRM2,WDR76,LIN9,TRIM59,ZRANB3,NUP54,FANCD2,MDP1,UCHL5,MKI67,MRE11,TTF2,CTDSPL2,DTL,HAT1,BEND3,DEPDC1,C7orf50,STIL,SMC2,ATAD2,SKP2,PABPC1,PTOV1,RAD51AP1,NOP58,C1orf112,FAM72A,CENPI,TPX2,NUP133,RACGAP1,CEP152,POLD3,PRR11,CLSPN,FIGNL1,DEPDC1B,PLK4,MYB,MCM8,RRP1B,ZC3H8,CENPK,CCNK,BLM,NEK2,BRCA2,DBF4,BUB1,BUB1B,TIMELESS,TAF4,TAF5,PRC1,NCAPH,CCNA2,CCNF…
Coexpression	M2228	Genes down-regulated in erythroid progenitor cells from fetal livers of E13.5 embryos with KLF1 [GeneID=10661] knockout compared to those from the wild type embryos.	MSigDB C2: CGP Curated Gene Sets (v6.0)	2.402e-66	2.408e-62	2.408e-63	2.358e-62	286	1972	STAG1,SMNDC1,SMC1A,ETV3,FAM91A1,MCM4,MCM6,RREB1,ARID1A,WDR76,ADAM10,TRIM59,SOCS7,NUP54,ARL6IP4,BPTF,NAA25,ARID1B,ADSS,USP42,UTP15,XPO5,UCHL5,NAF1,RNASEH2C,POLR1B,FBXO45,RNF138,DYRK2,VCPIP1,NCOA2,TTF2,XRN2,ZBTB2,TRA2B,CTDSPL2,PARG,ZNF280C,DTL,APAF1,TMEM175,ARFGEF1,LMTK2,UTP23,HAT1,DDI2,MSH2,API5,NAA50,USP37,SKIL,SKP2,PIAS1,ELOF1,FAM49B,RAD51AP1,NSUN3,CELF1,CTCF,ATF7IP,PPP4R2,EPC1,PAXIP1,GMEB1,RACG…
Coexpression Atlas	facebase_RNAseq_e10.5_Emin_LatNas_2500_K3	facebase_RNAseq_e10.5_Emin_LatNas_2500_K3	Gudmap RNAseq	3.543e-76	1.217e-72	1.217e-72	1.061e-71	248	1257	SRRM1,KIF18A,ZNF326,RNF168,ATAD5,SMC1A,MCM4,ACTL6A,CEP76,MCM10,RRM1,ARID1A,RRM2,WDR76,LIN9,TRIM59,ZRANB3,RSRC1,FANCD2,BPTF,USP42,UCHL5,ZNF644,NAF1,MKI67,SMARCA5,SFPQ,IPO7,TRA2B,CTDSPL2,DTL,ANKRD26,ARFGEF2,PHF6,HAT1,BEND3,G2E3,DEPDC1,ST3GAL3,STIL,SMC2,FANCM,ATAD2,PRPF40A,ESF1,RAD51AP1,NOP58,SNRNP48,CENPI,TPX2,PAXIP1,CCAR1,SMARCC1,MTBP,ATF1,EIF3A,KDM1B,PRR11,CLSPN,SPATA5,GEN1,PLK4,GABPB1,ZNF292,TGS…
Coexpression Atlas	GSM399403_500	alpha beta T cells, T.ISP.Th, 4- 8+ TCR-/lo 24hi, Thymus, avg-3	Immgen.org, GSE15907	5.215e-72	1.791e-68	8.954e-69	7.807e-68	139	417	KIF18A,BRIP1,ATAD5,MCM2,MCM4,MCM6,MCM10,RRM1,RRM2,WDR76,TRIM59,ZRANB3,FANCD2,FANCB,UCHL5,MKI67,MTF2,DTL,HAT1,G2E3,DEPDC1,NAA50,STIL,SMC2,FANCM,ATAD2,SKP2,DIS3,RAD51AP1,NOP58,CELF1,C1orf112,CENPI,TPX2,NUP133,RACGAP1,MTBP,PRR11,CLSPN,POLQ,FIGNL1,GEN1,DEPDC1B,PLK4,MYB,MCM8,BARD1,CENPK,NUP205,BLM,RTKN2,NEK2,BRCA1,BRCA2,DBF4,BUB1,BUB1B,TIMELESS,PRC1,NCAPH,TFDP1,CCNA2,TFRC,CCNF,MSH6,WDHD1,CCNE2,MASTL,E…
Coexpression Atlas	Facebase_RNAseq_e8.5_Hind Brain Neural Epithelium_2500_K3	FacebaseRNAseq_e8.5_Hind Brain Neural Epithelium_top-relative-expression-ranked_2500_k-means-cluster#3	FaceBase_RNAseq	4.026e-69	1.383e-65	4.609e-66	4.018e-65	153	533	EPRS,KIF18A,ERCC6,ATAD5,CEP76,WDR76,BIRC6,ESCO1,PPP1R2P3,UBR5,UCHL5,TAOK1,TTF2,SMARCA5,SFPQ,IPO7,PARG,ANKRD26,C7orf50,STIL,USP37,SMC2,FANCM,ATAD2,PIAS1,PRPF40A,FAM49B,ESF1,RAD51AP1,SNRNP48,N4BP2,PPP4R2,TPX2,PAXIP1,SMARCC1,MTBP,EIF3A,PRR11,CLSPN,POLQ,SPATA5,CNOT1,GEN1,TXLNG,PLK4,GABPB1,BDP1,CENPJ,MCM8,CDK12,RSF1,NCBP1,SMC5,CCNK,GMPS,STK4,BRCA1,BRCA2,TCERG1,DBF4,BUB1,PRPF4B,PDS5A,ASCC3,NRAS,DDX52,B…
Coexpression Atlas	PCBC_ratio_SC_vs_MESO-15_cfr-2X-p05	Pluripotent Stem Cells_vs_Mesoderm Day 15-Confounder_removed-fold2.0_adjp0.05	PCBC_AltAnalyze	3.186e-65	1.094e-61	2.735e-62	2.385e-61	300	1976	EPRS,KIF18A,RNF168,ATAD5,LSG1,ZNF267,MCM2,MCM4,MCM6,ACTL6A,CEP76,MCM10,RRM1,RRM2,WDR76,LIN9,TRIM59,ZNF551,NUP54,FANCD2,PIK3R4,BPTF,RMI1,NAA25,ADSS,WDR75,UBR5,UTP15,XPO5,CRLF3,ZNF644,NAF1,DCAF17,POLR1B,ZNF107,RNF138,SYNCRIP,TTF2,SMARCA5,XRN2,NAA15,IPO7,TRA2B,MTF2,DTL,ADNP2,PHF6,HAT1,BEND3,GINS4,G2E3,DEPDC1,MSH2,API5,NAA50,STIL,SMC2,CWC22,PRPF40A,GADD45GIP1,ESF1,AZIN1,RAD51AP1,NOP58,CCDC94,CELF1,CT…
Coexpression Atlas	facebase_RNAseq_e10.5_Emin_LatNas_2500	facebase_RNAseq_e10.5_Emin_LatNas_2500	Gudmap RNAseq	8.49e-64	2.915e-60	5.831e-61	5.084e-60	250	1459	SRRM1,KIF18A,ZNF326,RNF168,ATAD5,SMC1A,MCM4,ACTL6A,CEP76,MCM10,RRM1,ARID1A,RRM2,WDR76,LIN9,TRIM59,ZRANB3,RSRC1,FANCD2,BPTF,USP42,UCHL5,ZNF644,NAF1,MKI67,SMARCA5,SFPQ,IPO7,TRA2B,CTDSPL2,DTL,ANKRD26,ARFGEF2,PHF6,HAT1,BEND3,G2E3,DEPDC1,ST3GAL3,STIL,SMC2,FANCM,ATAD2,CWC22,PRPF40A,ESF1,RAD51AP1,NOP58,SNRNP48,CENPI,TPX2,PAXIP1,CCAR1,SMARCC1,MTBP,ATF1,EIF3A,KDM1B,PRR11,CLSPN,SPATA5,GEN1,PLK4,GABPB1,MYB,…
Coexpression Atlas	GSM399452_500	B cells, preB.FrC.BM, CD19+ IgM- CD45R+ CD43+ HSA+, Bone marrow, avg-3	Immgen.org, GSE15907	8.075e-59	2.773e-55	4.621e-56	4.029e-55	124	409	KIF18A,BRIP1,ATAD5,MCM2,MCM4,MCM6,MCM10,RRM1,RRM2,WDR76,TRIM59,ZRANB3,FANCD2,FANCB,MKI67,DTL,DEPDC1,STIL,SMC2,ATAD2,SKP2,ELOF1,RAD51AP1,C1orf112,CENPI,TPX2,RACGAP1,PRR11,CLSPN,POLQ,FIGNL1,GEN1,DEPDC1B,PLK4,MYB,MCM8,BARD1,CENPK,NUP205,BLM,RTKN2,NEK2,BRCA1,BRCA2,DBF4,BUB1,BUB1B,TIMELESS,CPSF2,PRC1,NCAPH,TFDP1,CCNA2,TFRC,CCNF,PKIG,WDHD1,CCNE2,MASTL,EXO1,CKAP2L,CDK1,SERINC5,CDC6,TOP2A,HELLS,CENPE,CEN…
Coexpression Atlas	GSM399397_500	alpha beta T cells, T.DPbl.Th, 4+ 8+ TCR-/lo FSChi, Thymus, avg-3	Immgen.org, GSE15907	2.119e-57	7.276e-54	1.039e-54	9.062e-54	121	399	KIF18A,BRIP1,ATAD5,MCM10,RRM1,RRM2,WDR76,LIN9,TRIM59,ZRANB3,FANCD2,MKI67,TTF2,DTL,G2E3,DEPDC1,STIL,SMC2,ATAD2,RAD51AP1,C1orf112,CENPI,TPX2,RACGAP1,PRR11,CLSPN,POLQ,FIGNL1,GEN1,DEPDC1B,PLK4,MYB,BARD1,CENPK,BLM,RTKN2,NEK2,BRCA1,BRCA2,DBF4,BUB1,BUB1B,TIMELESS,ATL2,PRC1,NCAPH,TFDP1,CCNA2,CCNF,CCNE2,MASTL,EXO1,CKAP2L,TMPO,CDK1,SERINC5,TOP2A,HELLS,CENPE,CENPF,CCDC18,HMMR,TRIP13,TTK,KIF24,ANLN,RAD54B,CC…
Coexpression Atlas	GSM791143_500	alpha beta T cells, preT.DN3-4.Th, Lin-/lo CD25int CD44- CD28+, Thymus, avg-3	Immgen.org, GSE15907	7.839e-56	2.692e-52	3.365e-53	2.934e-52	119	397	KIF18A,BRIP1,ATAD5,MCM2,MCM4,MCM6,ACTL6A,MCM10,RRM1,RRM2,WDR76,ZRANB3,FANCD2,FANCB,UCHL5,NAF1,MKI67,MTF2,DTL,HAT1,DEPDC1,NAA50,STIL,SMC2,ATAD2,SKP2,RAD51AP1,NOP58,C1orf112,CENPI,TPX2,NUP133,PRR11,CLSPN,FIGNL1,GEN1,PLK4,MYB,MCM8,BARD1,CENPK,NDUFC1,BLM,RTKN2,NEK2,BRCA1,BRCA2,DBF4,BUB1,BUB1B,PRC1,NCAPH,TFDP1,CCNA2,TFRC,CCNF,WDHD1,CCNE2,MASTL,EXO1,CKAP2L,CDK1,NUDCD1,CDC6,TOP2A,C4orf46,HELLS,CENPE,CEN…
Coexpression Atlas	gudmap_dev gonad_e12.5_M_GermCellTestis_Oct_1000	dev gonad_e12.5_M_GermCellTestis_Oct_top-relative-expression-ranked_1000	Gudmap Mouse ST 1.0	1.28e-55	4.394e-52	4.882e-53	4.257e-52	169	795	KIF18A,BRIP1,SMNDC1,MCM2,MCM10,WDR76,ZRANB3,FANCD2,FANCB,NAA25,WDR75,CEP78,UBR5,UTP15,CRLF3,POLR1B,RNF138,CUL2,MRE11,USP28,PARG,HAT1,G2E3,MSH2,USP37,ATAD2,CWC22,DIS3,ESF1,C1orf112,CENPI,NUP133,POLD3,CLSPN,STK38L,SPATA5,FIGNL1,TXLNG,PLK4,MYB,ATR,MCM8,RRP1B,PPRC1,ZC3H8,BARD1,RCC2,WDR43,HELB,NUP205,BLM,WDR3,NEK2,MDN1,ATP11B,BRCA1,BRCA2,DBF4,DDX18,BUB1,POP1,BUB1B,UTP20,TAF4B,TAF5,NUP160,CAD,GPX1,NOC3…
Coexpression Atlas	gudmap_dev gonad_e11.5_M_PrimGermCell_Oct_k2_1000	dev gonad_e11.5_M_PrimGermCell_Oct_k-means-cluster#2_top-relative-expression-ranked_1000	Gudmap Mouse ST 1.0	1.507e-52	5.174e-49	5.174e-50	4.511e-49	94	258	KIF18A,BRIP1,MCM2,ZRANB3,FANCD2,WDR75,RNF138,MRE11,HAT1,ATAD2,DIS3,CENPI,NUP133,POLD3,CLSPN,STK38L,FIGNL1,TXLNG,MCM8,TTLL5,BARD1,NR6A1,NUP205,BLM,NEK2,BRCA1,DBF4,BUB1,BUB1B,TAF4B,TAF5,CAD,PRC1,TFRC,MSH6,WDHD1,NFATC2IP,BAZ2A,MASTL,EXO1,NUP188,MORC3,CDC6,HELLS,CENPF,CCDC18,HMMR,TTK,RBM27,ANLN,RAD54B,WDR36,WEE1,POLA1,IDE,KIF20B,PRIM1,OTUD4,ESPL1,IPMK,KNTC1,RAD18,INCENP,ERCC6L,DLGAP5,DCK,STK35,UHRF1B…
Computational	M17279 GNF2_PCNA	Neighborhood of PCNA	MSigDb: C4 - CGN: Cancer Gene Neighborhood (v6.0)	2.221e-24	1.499e-21	1.499e-21	1.063e-20	37	68	MCM2,MCM4,MCM6,RRM1,RRM2,MKI67,DTL,MSH2,SMC2,RAD51AP1,TPX2,PAXIP1,RACGAP1,PLK4,BUB1B,PRC1,CCNA2,TMPO,CDK1,TOP2A,CENPE,CENPF,HMMR,TTK,ASPM,VRK1,POLE2,PRIM1,ESPL1,DLGAP5,MELK,GINS1,KIF15,KIF11,SMC4,CDCA8,FANCI
Computational	M12856 GNF2_SMC4L1	Neighborhood of SMC4L1	MSigDb: C4 - CGN: Cancer Gene Neighborhood (v6.0)	2.562e-22	1.729e-19	8.646e-20	6.132e-19	39	84	MCM2,MCM4,RRM1,DTL,HAT1,MSH2,SMC2,RAD51AP1,RACGAP1,PLK4,BUB1B,PRC1,CCNA2,SUPT16H,TMPO,CDK1,TOP2A,CENPF,HMMR,TTK,ASPM,USP1,VRK1,POLE2,PRIM1,DLGAP5,GINS1,FBXO5,DKC1,DEK,NUP153,KIF11,ZWILCH,SMC4,RFC3,CDCA8,E2F8,FANCI,CKAP2
Computational	M7419 GNF2_CCNA2	Neighborhood of CCNA2	MSigDb: C4 - CGN: Cancer Gene Neighborhood (v6.0)	4.727e-22	3.191e-19	1.064e-19	7.544e-19	35	68	MCM2,MCM4,MCM6,RRM1,RRM2,MKI67,SMC2,RAD51AP1,TPX2,RACGAP1,BUB1B,PRC1,CCNA2,TMPO,CDK1,TOP2A,CENPE,CENPF,HMMR,TTK,ASPM,PRIM1,ESPL1,DLGAP5,KIF4A,MELK,NCAPD2,KIF14,KIF11,SMC4,RFC3,CDCA8,E2F8,KIF20A,FANCI
Computational	M5468 MODULE_54	Cell cycle (expression cluster).	MSigDb: C4 - CM: Cancer Modules (v6.0)	2.877e-21	1.942e-18	4.854e-19	3.443e-18	69	262	ZNF267,MCM2,MCM4,MCM6,RRM1,RRM2,UCHL5,MKI67,BEND3,DEPDC1,MSH2,SMC2,ATAD2,TPX2,PRR11,POLQ,DEPDC1B,PLK4,MTHFD2,BARD1,SRPK1,BLM,NEK2,BUB1,BUB1B,TIMELESS,TOPBP1,NCAPH,CCNA2,CCNF,CCNE2,CDK1,CDC6,TOP2A,CENPE,CENPF,HMMR,TRIP13,TTK,ANLN,ASPM,PMAIP1,KIF23,IARS,POLE2,CSE1L,PRIM1,KNTC1,DLGAP5,NUF2,ARHGAP11A,MELK,GINS1,NCAPD2,KIF14,FAM83D,KIF11,KPNA2,ZWILCH,SMC4,HUWE1,RFC3,ECT2,E2F8,CEP55,LMNB1,CDCA7,CKAP2,M…
Computational	M11786 GNF2_RRM1	Neighborhood of RRM1	MSigDb: C4 - CGN: Cancer Gene Neighborhood (v6.0)	2.079e-19	1.403e-16	2.807e-17	1.991e-16	37	88	MCM2,MCM4,MCM6,RRM1,RRM2,MKI67,DTL,HAT1,MSH2,SMC2,RAD51AP1,RACGAP1,PLK4,BUB1B,PRC1,CCNA2,USP14,TMPO,CDK1,TOP2A,CENPE,CENPF,HMMR,TTK,ASPM,VRK1,PRIM1,DLGAP5,MELK,GINS1,KIF14,KIF11,SMC4,RFC3,CDCA8,E2F8,FANCI
Computational	M13566 GNF2_CDC2	Neighborhood of CDC2	MSigDb: C4 - CGN: Cancer Gene Neighborhood (v6.0)	3.447e-19	2.326e-16	3.877e-17	2.75e-16	31	62	MCM2,RRM1,RRM2,MKI67,SMC2,TPX2,PLK4,PRC1,CCNA2,CCNF,TMPO,CDK1,TOP2A,CENPE,CENPF,HMMR,TTK,ASPM,PRIM1,DLGAP5,KIF4A,MELK,KIF15,KIF11,SMC4,RFC3,CDCA8,E2F8,KIF20A,FANCI,CKAP2
Computational	M12521 GNF2_HMMR	Neighborhood of HMMR	MSigDb: C4 - CGN: Cancer Gene Neighborhood (v6.0)	5.894e-19	3.978e-16	5.683e-17	4.031e-16	27	47	MCM2,MCM4,RRM1,RRM2,MKI67,SMC2,PLK4,BUB1,BUB1B,PRC1,CCNA2,CDK1,TOP2A,CENPE,CENPF,HMMR,TTK,ASPM,ESPL1,DLGAP5,MELK,KIF11,SMC4,RFC3,CDCA8,E2F8,KIF20A
Computational	M17151 GNF2_CDC20	Neighborhood of CDC20	MSigDb: C4 - CGN: Cancer Gene Neighborhood (v6.0)	1.404e-18	9.478e-16	1.185e-16	8.403e-16	29	56	MCM2,MCM4,RRM1,RRM2,MKI67,SMC2,TPX2,RACGAP1,PLK4,BUB1,BUB1B,PRC1,NCAPH,CCNA2,CDK1,TOP2A,CENPE,CENPF,HMMR,TTK,ASPM,ESPL1,DLGAP5,KIF4A,MELK,KIF11,SMC4,CDCA8,KIF20A
Computational	M8304 GNF2_BUB1B	Neighborhood of BUB1B	MSigDb: C4 - CGN: Cancer Gene Neighborhood (v6.0)	2.597e-18	1.753e-15	1.795e-16	1.273e-15	27	49	MCM2,MCM4,RRM1,RRM2,RACGAP1,NUP205,BUB1,BUB1B,CCNA2,TOP2A,HELLS,HMMR,TTK,ASPM,CSE1L,ESPL1,MELK,GINS1,NCAPD2,KIF14,KIF11,SMC4,CDCA8,CEP55,KIF20A,LMNB1,FANCI
Computational	M15766 GNF2_CCNB2	Neighborhood of CCNB2	MSigDb: C4 - CGN: Cancer Gene Neighborhood (v6.0)	2.659e-18	1.795e-15	1.795e-16	1.273e-15	29	57	MCM2,MCM4,RRM1,RRM2,SMC2,TPX2,RACGAP1,PLK4,BUB1,BUB1B,PRC1,NCAPH,CCNA2,CDK1,TOP2A,CENPE,CENPF,HMMR,TTK,ASPM,ESPL1,DLGAP5,KIF4A,MELK,KIF11,SMC4,CDCA8,KIF20A,CKAP2
MicroRNA	hsa-miR-548g:PITA	hsa-miR-548g:PITA_TOP	PITA	2.489e-23	8.112e-20	8.112e-20	7.03e-19	107	649	FAM91A1,ARID1A,RYK,PHC3,USP42,ZNF644,FBXO45,DYRK2,XRN2,FYTTD1,NAA15,TRA2B,ZNF280C,APAF1,AZIN1,TRIM33,SETD2,CDK13,ATF7IP,ZFR,ATF1,ZBTB11,SPEN,LCOR,STAG2,SON,ZNF292,KDM5B,SP3,SPAST,ZC3H15,PPP1R12A,RSF1,ASH1L,MYNN,NR6A1,SPIN4,STK4,RAB10,RTKN2,STRN,ATP11B,TCERG1,FUBP1,TAF4,TAF5,TCF20,BAZ1B,BTAF1,CBLB,CCNA2,ZNF800,LATS1,SF3B3,BAZ2A,BAZ1A,MAP4K5,ZFP91,SUPT16H,R3HDM1,PPTC7,CDK8,MFHAS1,ATAD2B,CDYL,ACBD3,…
MicroRNA	hsa-miR-590-3p:PITA	hsa-miR-590-3p:PITA_TOP	PITA	4.007e-21	1.306e-17	6.529e-18	5.659e-17	176	1477	ZNF326,ADAM10,ESCO1,RYK,MEX3C,BPTF,PHC3,INTS2,USP42,UCHL5,ZNF644,MIB1,FBXO45,RNF138,SYNCRIP,DYRK2,VCPIP1,CUL2,SFPQ,ZBTB2,NAA15,TRA2B,USP28,APAF1,ZNF507,ADNP2,ARFGEF2,VTA1,NAA50,USP37,PABPC1,PRPF40A,AZIN1,TRIM33,MSRB2,N4BP2,ATF7IP,RBAK,ATF1,KDM1B,STK38L,YME1L1,LCOR,STAG2,DCP1A,ZNF292,SP3,RAPGEF6,CAND1,ARID4B,RBM12B,CDK12,ASH1L,NDUFA8,SMC5,CENPK,SPIN4,RTKN2,STRN,UBXN4,ATP11B,TCERG1,PRPF4B,TAF4B,NUP…
MicroRNA	hsa-miR-548n:PITA	hsa-miR-548n:PITA_TOP	PITA	4.71e-20	1.535e-16	5.117e-17	4.434e-16	134	1011	NCOA3,CEP76,ESCO1,BPTF,PHC3,ADSS,UBR5,USP12,RNF138,VCPIP1,FYTTD1,TRA2B,CTDSPL2,ZBTB26,API5,SKIL,PIAS1,DIS3,FAM49B,MFN1,TRIM33,MTF1,N4BP2,PAXIP1,RACGAP1,EIF3A,TXLNG,STAG2,DCP1A,SON,ZNF292,SP1,SP3,ZBTB6,CAND1,SPAST,ARID4B,AVL9,CDK12,MTHFD2,PPP1R12A,ASH1L,RBM26,METAP1,TCERG1,FUBP1,FBXO28,PRPF4B,TAF2,TAF4,SPTY2D1,NPAT,GPD2,CPSF6,SMCHD1,DICER1,CCNA2,CCNT2,ZNF800,GTF2I,SF3B3,ACAP2,XPOT,LEMD3,CHD1,SENP1…
MicroRNA	hsa-miR-570:PITA	hsa-miR-570:PITA_TOP	PITA	1.957e-19	6.379e-16	1.595e-16	1.382e-15	133	1016	ARID1A,ADAM10,CNOT6,ARID1B,INTS2,USP42,UBR5,ATXN7,RNASEH2C,NUFIP2,DYRK2,NCOA2,CUL2,TRA2B,CTDSPL2,ADNP2,ARFGEF1,ZBTB26,NAA50,SMC2,INTS8,MTF1,PAXIP1,TAF5L,TNKS2,ZBTB11,SPEN,STAG2,DCP1A,NUP50,SP1,CAND1,ARID4B,PPP1R12A,ASH1L,RBM26,SRPK1,GPATCH8,NEDD1,SMC5,METAP1,STK4,STRN,RCOR1,FBXO28,PRPF4B,MGA,SPTY2D1,GPD2,TCF20,ADNP,OPA1,CCNA2,CCNT2,ZNF800,DCUN1D1,MAP4K5,PAFAH1B2,ZFP91,NFXL1,SUZ12,R3HDM1,RSBN1L,TO…
MicroRNA	hsa-miR-548c-3p:PITA	hsa-miR-548c-3p:PITA_TOP	PITA	4.409e-18	1.437e-14	2.873e-15	2.49e-14	145	1196	NCOA3,SRRM1,ARID1A,RRM2,TRRAP,MEX3C,ARID1B,UBR5,ATXN7,NUFIP2,MIB1,USP12,PIP5K1A,TAOK1,FBXO45,DYRK2,NCOA2,RNF169,XRN2,NAA15,TRA2B,CTDSPL2,ARFGEF1,LMTK2,VTA1,NAA50,USP37,PRPF40A,MXD4,FAM49B,SCYL2,SMARCC1,TAF5L,TNKS2,ZBTB11,PLK4,STAG2,MYB,ZNF292,NUP50,SP3,CAND1,TNFSF12,PPRC1,CDK12,PPP1R12A,GPATCH8,SMC5,SPIN4,WDR43,RAB10,BRCA1,TCERG1,CSNK1G1,PRPF4B,TAF4,SPTY2D1,GPD2,CPSF6,TOPBP1,PUM2,ADNP,DICER1,DCUN…
MicroRNA	hsa-miR-548e:PITA	hsa-miR-548e:PITA_TOP	PITA	5.371e-18	1.751e-14	2.918e-15	2.528e-14	113	827	SMNDC1,FAM91A1,ADAM10,RYK,MEX3C,NUP54,PHC3,ADSS,INTS2,THAP3,FBXO45,RNF138,DYRK2,VCPIP1,XRN2,NAA15,MTF2,ZNF280C,VTA1,NAA50,PIAS1,FAM49B,MFN1,AZIN1,TRIM33,CDK13,ZFR,KDM2A,SPEN,TXLNG,STAG2,SP3,ZC3H15,PPP1R12A,ASH1L,SPIN4,STK4,RAB10,STRN,PAPOLA,FUBP1,CSNK1G1,TAF4,TAF5,TCF20,CPSF6,CAPZA1,XPO4,BTAF1,TDG,CCNA2,DCUN1D1,LATS1,SF3B3,BAZ2A,BAZ1A,PAK2,NUP188,MMAB,PPTC7,CIRBP,UBN1,ATAD2B,PLAGL2,BOD1L1,CDYL,KD…
MicroRNA	hsa-miR-548f:PITA	hsa-miR-548f:PITA_TOP	PITA	7.069e-18	2.304e-14	3.291e-15	2.852e-14	113	830	SMNDC1,FAM91A1,ADAM10,RYK,MEX3C,NUP54,PHC3,ADSS,INTS2,THAP3,FBXO45,RNF138,DYRK2,VCPIP1,XRN2,NAA15,MTF2,ZNF280C,VTA1,NAA50,PIAS1,FAM49B,MFN1,AZIN1,TRIM33,CDK13,ZFR,KDM2A,SPEN,TXLNG,STAG2,SP3,ZC3H15,PPP1R12A,ASH1L,SPIN4,STK4,RAB10,STRN,PAPOLA,FUBP1,CSNK1G1,TAF4,TAF5,TCF20,CPSF6,CAPZA1,XPO4,BTAF1,TDG,CCNA2,DCUN1D1,LATS1,SF3B3,BAZ2A,BAZ1A,PAK2,NUP188,MMAB,PPTC7,CIRBP,UBN1,ATAD2B,PLAGL2,BOD1L1,CDYL,KD…
MicroRNA	hsa-miR-548o:PITA	hsa-miR-548o:PITA_TOP	PITA	1.866e-17	6.081e-14	6.757e-15	5.856e-14	97	665	SMNDC1,TMEM222,ADAM10,MEX3C,ADSS,INTS2,ZNF644,SCN1B,FBXO45,RNF138,VCPIP1,NCOA2,ZNF280C,ARFGEF2,NAA50,PRPF40A,MFN1,AZIN1,ATF7IP,OTUD6B,KDM2A,SPEN,TXLNG,STAG2,ZNF292,SPAST,MCM8,CDK12,MYNN,GPATCH8,SPIN4,RAB10,STRN,PAPOLA,FBXO28,SPTY2D1,NUDT21,TFRC,SF3B3,BAZ1A,CCNE2,SUPT16H,NFXL1,MRPL3,NUP188,PPTC7,LEMD3,SENP1,SINHCAF,UBN1,ATAD2B,CDYL,DNAJB2,WEE1,ERO1A,MED1,CLOCK,YWHAZ,PPP2R5E,ZZZ3,USP34,ZNF131,ZNF14…
MicroRNA	hsa-miR-1323:PITA	hsa-miR-1323:PITA_TOP	PITA	1.866e-17	6.081e-14	6.757e-15	5.856e-14	97	665	SMNDC1,TMEM222,ADAM10,MEX3C,ADSS,INTS2,ZNF644,SCN1B,FBXO45,RNF138,VCPIP1,NCOA2,ZNF280C,ARFGEF2,NAA50,PRPF40A,MFN1,AZIN1,ATF7IP,OTUD6B,KDM2A,SPEN,TXLNG,STAG2,ZNF292,SPAST,MCM8,CDK12,MYNN,GPATCH8,SPIN4,RAB10,STRN,PAPOLA,FBXO28,SPTY2D1,NUDT21,TFRC,SF3B3,BAZ1A,CCNE2,SUPT16H,NFXL1,MRPL3,NUP188,PPTC7,LEMD3,SENP1,SINHCAF,UBN1,ATAD2B,CDYL,DNAJB2,WEE1,ERO1A,MED1,CLOCK,YWHAZ,PPP2R5E,ZZZ3,USP34,ZNF131,ZNF14…
MicroRNA	hsa-miR-607:PITA	hsa-miR-607:PITA_TOP	PITA	2.245e-17	7.316e-14	7.316e-15	6.34e-14	121	934	BIRC6,LIN9,CNOT6,BPTF,NAA25,ARID1B,USP42,ZNF644,MIB1,PIP5K1A,VCPIP1,RNF169,SFPQ,CTDSPL2,ARFGEF2,API5,PRPF40A,AZIN1,TRIM33,CELF1,CTCF,MTF1,PAXIP1,ZFR,EIF3A,DAAM1,MAP3K2,MYB,SP1,RAPGEF6,CAND1,CDK12,PPP1R12A,GPATCH8,SMC5,BLM,METAP1,RTKN2,TCERG1,CSNK1G1,PRPF4B,MGA,SPTY2D1,CPSF6,DDX52,TDG,DICER1,OPA1,AP4E1,CCNT2,DCUN1D1,GTF2I,BAZ2A,BAZ1A,PAFAH1B2,ZFP91,SUPT16H,NIPAL1,SUZ12,TRAF3,MED14,TMOD3,KPNA6,SENP…
Drug	D004791	Enzyme Inhibitors	CTD	1.324e-49	4.082e-45	4.082e-45	4.455e-44	238	1663	EPRS,ZNF326,STUB1,SMNDC1,MCM6,EYA3,RRM1,ARID1A,ADAR,NUP54,ARL6IP4,FANCD2,PHC3,NAA25,ARID1B,FAU,ADSS,XPO5,NAF1,NUFIP2,MKI67,SYNCRIP,XRN2,SFPQ,NAA15,IPO7,TRA2B,SGTA,PARG,ZNF280C,PHF6,HAT1,BEND3,MSH2,C7orf50,CAMK1,API5,CHORDC1,SMC2,PABPC1,PRPF40A,DIS3,MBD3,FAM49B,TRIM33,YEATS2,NOP58,CELF1,OTUD6B,PPP4R2,TPX2,CCAR1,SMARCC1,ZFR,ATOX1,SPEN,SPATA5,CNOT1,TXLNG,DCP1A,SON,NUP50,SP1,NCOA6,SP3,CAND1,UBAP2,RBM…
Drug	D003375	Coumestrol	CTD	1.939e-44	5.98e-40	2.99e-40	3.263e-39	239	1790	NCOA3,KIF18A,STAG1,SMC1A,MCM2,MCM4,MCM6,MCM10,RRM1,RRM2,WDR76,TRIM59,RYK,RSRC1,FANCD2,RMI1,MGAT5,CEP78,UCHL5,MKI67,PIP5K1A,POLR1B,TAOK1,SLC25A11,SYNCRIP,NCOA2,MRE11,TTF2,NAA15,TRA2B,CTDSPL2,ALKBH7,SHBG,ARFGEF2,HAT1,GINS4,G2E3,DEPDC1,MSH2,ZBTB26,NAA50,STIL,SMC2,SKIL,ATAD2,BLZF1,SKP2,MXD4,GADD45GIP1,FAM49B,RAD51AP1,CDK13,C1orf112,CENPI,TPX2,RACGAP1,CEP152,DAAM1,POLD3,KDM1B,POLQ,STK38L,FIGNL1,DEPDC1…
Drug	C015559	trimellitic anhydride	CTD	1.433e-37	4.419e-33	1.473e-33	1.608e-32	231	1862	NCOA3,KIF18A,BRIP1,ATAD5,SMC1A,MCM2,MCM4,MCM6,ACTL6A,EYA3,MCM10,RRM1,RRM2,TMEM205,RSC1A1,ANKRD27,ZRANB3,SOCS7,FANCD2,ADSS,XPO5,UCHL5,MKI67,POLR1B,SYNCRIP,NCOA2,MRE11,TTF2,SMARCA5,SFPQ,IKZF3,NAA15,IPO7,DTL,LMTK2,HAT1,MRPL28,G2E3,STIL,USP37,SMC2,FANCM,ATAD2,SKP2,DIS3,GADD45GIP1,RAD51AP1,PMVK,OTUD6B,FAM72A,CENPI,TPX2,PAXIP1,NUP133,CCAR1,RACGAP1,SMARCC1,MTBP,TAF5L,PRR11,CLSPN,POLQ,CNOT1,FIGNL1,GEN1,D…
Drug	3887_DN	Camptothecine (S,+) [7689-03-4]; Down 200; 11.4uM; MCF7; HT_HG-U133A	Broad Institute CMAP	3.254e-36	1.004e-31	2.509e-32	2.738e-31	64	182	RREB1,ARID1A,ATXN7,NCOA2,MTF2,ADNP2,TRIM33,NSUN3,CTCF,ZFP64,POLD3,SPEN,GABPB1,MYB,SON,TGS1,KDM5B,ARID4B,PPP1R12A,BRCA2,FBXO28,BUB1B,NFYA,PRPF4B,TAF4,TAF5,MGA,UBR2,PUM2,BTAF1,ADNP,CCNF,BAZ1A,CENPE,LEMD3,CHD1,TTK,RBM25,ASPM,CDYL,NIPBL,KIF20B,ZNHIT6,ZZZ3,PUM1,USP6NL,RNF111,ZNF143,ERCC6L,PRDM2,CEP350,JARID2,KIF2A,MED13,NUP153,KIF11,HMGXB4,E2F3,MSL2,RLF,RIF1,SETD5,VANGL1,ELF1
Drug	D008154	Lucanthone	CTD	1.624e-35	5.007e-31	1.001e-31	1.093e-30	68	212	MCM10,RRM2,WDR76,LIN9,MKI67,DTL,DEPDC1,ATAD2,RAD51AP1,FAM72A,CENPI,TPX2,RACGAP1,PRR11,DEPDC1B,PLK4,MCM8,CENPK,BLM,NEK2,BRCA1,BRCA2,BUB1,BUB1B,PRC1,NCAPH,CCNA2,EXO1,CKAP2L,KIF4B,CDK1,CDC6,TOP2A,CENPE,CENPF,HMMR,TTK,ANLN,ASPM,IQGAP3,KIF23,POLE2,XRCC2,KIF20B,PRIM1,ESPL1,ERCC6L,CENPL,DLGAP5,KIF4A,NUF2,ARHGAP11A,MELK,NCAPG2,FBXO5,KIF15,KIF14,DIAPH3,DNA2,ARHGAP11B,KIF11,SMC4,ECT2,CEP55,ESCO2,KIF20A,FAN…
Drug	7498_DN	irinotecan HCl; Down 200; 100uM; MCF7; HT_HG-U133A	Broad Institute CMAP	4.914e-34	1.515e-29	2.526e-30	2.756e-29	62	183	NCOA3,BRIP1,STAG1,TRRAP,BPTF,UBR5,SYNCRIP,NCOA2,MTF2,DTL,ATAD2,PIAS1,MFN1,SCYL2,TRIM33,SETD2,ATF7IP,CENPI,TPX2,DAAM1,GABPB1,SPAST,ARID4B,CDK12,PPP1R12A,BARD1,RCOR1,MDN1,BUB1B,MGA,NSD1,NCAPH,MSH6,SMC3,BAZ1A,TMPO,ACAP2,CDK8,CENPE,CHD1,RAD54B,CDYL,ARIH1,NIPBL,ROCK2,KNTC1,ZNF148,PRDM2,CEP350,JARID2,PTPN4,PTPN12,DENND1B,KIF15,KIF14,DLG1,SAP130,KIF11,RFC3,ELF1,CAPRIN1,VPS13B
Drug	C488369	dasatinib	CTD	3.616e-30	1.115e-25	1.593e-26	1.738e-25	94	472	ATAD5,MCM6,MCM10,RRM1,RRM2,WDR76,FANCD2,MKI67,DTL,GINS4,DEPDC1,MSH2,STIL,SMC2,FANCM,ATAD2,C1orf112,CENPI,TPX2,RACGAP1,MTBP,CEP152,PRR11,CLSPN,POLQ,STK38L,FIGNL1,GEN1,DEPDC1B,PLK4,MCM8,CENPK,BRCA1,BRCA2,BUB1,BUB1B,TIMELESS,PRC1,NCAPH,WDHD1,MASTL,EXO1,CKAP2L,CD63,TMPO,CDK1,CDC6,TOP2A,HELLS,CENPE,CENPF,E2F7,HMMR,TRIP13,TTK,ANLN,ASPM,IQGAP3,VRK1,KIF23,POLA1,POLE2,CENPO,XRCC2,PPAT,KIF20B,PRIM1,KNTC1,C…
Drug	D000069439	Dasatinib	CTD	5.101e-30	1.573e-25	1.841e-26	2.009e-25	94	474	ATAD5,MCM6,MCM10,RRM1,RRM2,WDR76,FANCD2,MKI67,DTL,GINS4,DEPDC1,MSH2,STIL,SMC2,FANCM,ATAD2,C1orf112,CENPI,TPX2,RACGAP1,MTBP,CEP152,PRR11,CLSPN,POLQ,STK38L,FIGNL1,GEN1,DEPDC1B,PLK4,MCM8,CENPK,BRCA1,BRCA2,BUB1,BUB1B,TIMELESS,PRC1,NCAPH,WDHD1,MASTL,EXO1,CKAP2L,CD63,TMPO,CDK1,CDC6,TOP2A,HELLS,CENPE,CENPF,E2F7,HMMR,TRIP13,TTK,ANLN,ASPM,IQGAP3,VRK1,KIF23,POLA1,POLE2,CENPO,XRCC2,PPAT,KIF20B,PRIM1,KNTC1,C…
Drug	2321_DN	Camptothecine (S,+) [7689-03-4]; Down 200; 11.4uM; MCF7; HT_HG-U133A	Broad Institute CMAP	5.372e-30	1.657e-25	1.841e-26	2.009e-25	58	184	ZNF267,CEP76,RREB1,ARID1A,BPTF,ATXN7,ZNF107,DYRK2,NCOA2,MTF2,ADNP2,TRIM33,CTCF,ATF7IP,PLK4,GABPB1,ZNF292,TGS1,KDM5B,ARID4B,PPRC1,PPP1R12A,RCOR1,BRCA2,DBF4,TAF4,TAF5,MGA,NPAT,PUM2,ADNP,CCNF,CCNT2,LEMD3,CHD1,ASPM,PLAGL2,CDYL,NIPBL,RBM15,ZNHIT6,PUM1,RNF111,ZNF143,ERCC6L,ZNF217,URB2,TSC22D2,ZBTB24,PRDM2,CEP350,JARID2,NUP153,E2F3,MSL2,RIF1,SETD5,ELF1
Drug	C029497	2,3-bis(3'-hydroxybenzyl)butyrolactone	CTD	6.103e-29	1.882e-24	1.882e-25	2.054e-24	139	959	KIF18A,SMC1A,MCM2,MCM4,MCM6,MCM10,RRM1,RRM2,WDR76,TRIM59,RSRC1,FANCD2,RMI1,CEP78,UCHL5,MKI67,SLC25A11,MRE11,CTDSPL2,GINS4,G2E3,DEPDC1,ZBTB26,NAA50,STIL,SMC2,ATAD2,SKP2,MXD4,FAM49B,RAD51AP1,C1orf112,CENPI,TPX2,RACGAP1,POLD3,STK38L,FIGNL1,PLK4,MYB,ZNF292,KDM5B,MCM8,BARD1,TUBGCP4,SPIN4,BLM,GMPS,BRCA1,BRCA2,DBF4,BUB1B,TIMELESS,TAF5,TOPBP1,CBLB,TFDP1,CCNF,MSH6,SF3B3,WDHD1,NFATC2IP,CCNE2,SUPT16H,MASTL,…
Disease	C0376628	Chromosome Breakage	DisGeNET Curated	4.58e-09	2.678e-05	1.533e-05	0.0001418	13	32	FANCD2,FANCB,PMVK,NBN,BLM,BRCA1,BRCA2,HELLS,POLA1,XRCC2,ZBTB24,DNMT3B,FANCI
Disease	C1859424	Increased chromosomal breakage	DisGeNET Curated	5.242e-09	3.065e-05	1.533e-05	0.0001418	12	27	FANCD2,FANCB,PMVK,NBN,BLM,BRCA2,HELLS,POLA1,XRCC2,ZBTB24,DNMT3B,FANCI
Disease	C0424688	Small head	DisGeNET Curated	1.163e-08	6.804e-05	1.793e-05	0.0001658	49	375	CLPP,DGCR6,ERCC6,SMC1A,MCM4,ARID1A,FANCD2,FANCB,ARFGEF2,POMT1,STIL,CTCF,CEP152,PLK4,ATR,NBN,TUBGCP4,BLM,BRCA2,BUB1,BUB1B,TAF2,BAZ1B,AP4E1,GTF2I,SMC3,CDC6,CENPE,CENPF,LEMD3,RAB3GAP2,PEX16,KDM6A,NIPBL,POLR1A,MPDU1,SIN3A,XRCC2,CEP135,PRKDC,DKC1,KIF14,KIF2A,DNA2,QDPR,KIF11,RAD21,FANCI,EP300
Disease	C0557874	Global developmental delay	DisGeNET Curated	1.776e-08	0.0001038	1.793e-05	0.0001658	79	757	SMC1A,RREB1,ARID1A,ADAR,FANCD2,FANCB,SCN1B,ARFGEF2,CHD8,POMT1,STIL,SETD2,CTCF,SMPD1,UQCRQ,CEP152,PLK4,SPAST,GAMT,NBN,NDUFA1,NDUFA2,TUBGCP4,GFER,NDUFS3,NDUFV1,NDUFS8,BRAF,BRCA2,SURF1,BUB1,BUB1B,EXOC6B,TAF1,TAF2,MARS2,CAD,ADNP,DICER1,POLR3A,AP4E1,WDR45,SMC3,MRPL3,CDC6,HELLS,B4GALT7,CENPE,LEMD3,PIK3CA,RAB3GAP2,PEX16,UROD,KDM6A,VRK1,POLA1,MPDU1,NDUFAF3,SIN3A,XRCC2,IQCB1,CEP135,KIAA0586,ZBTB24,ALMS1,D…
Disease	C4020875	Mental and motor retardation	DisGeNET Curated	1.839e-08	0.0001076	1.793e-05	0.0001658	68	614	SMC1A,RREB1,ARID1A,ADAR,FANCD2,FANCB,SCN1B,ARFGEF2,POMT1,STIL,SETD2,CTCF,SMPD1,UQCRQ,CEP152,PLK4,GAMT,NDUFA1,NDUFA2,TUBGCP4,GFER,NDUFS3,NDUFV1,NDUFS8,BRAF,BRCA2,SURF1,BUB1,BUB1B,TAF2,CAD,ADNP,POLR3A,AP4E1,WDR45,SMC3,MRPL3,CDC6,HELLS,B4GALT7,LEMD3,PIK3CA,RAB3GAP2,PEX16,KDM6A,VRK1,POLA1,MPDU1,NDUFAF3,SIN3A,XRCC2,IQCB1,CEP135,KIAA0586,ZBTB24,ALMS1,DKC1,KIF2A,DNA2,QDPR,DNMT3B,RAD21,KRAS,LRPPRC,NDUFAF…
Disease	C1864897	Cognitive delay	DisGeNET Curated	1.839e-08	0.0001076	1.793e-05	0.0001658	68	614	SMC1A,RREB1,ARID1A,ADAR,FANCD2,FANCB,SCN1B,ARFGEF2,POMT1,STIL,SETD2,CTCF,SMPD1,UQCRQ,CEP152,PLK4,GAMT,NDUFA1,NDUFA2,TUBGCP4,GFER,NDUFS3,NDUFV1,NDUFS8,BRAF,BRCA2,SURF1,BUB1,BUB1B,TAF2,CAD,ADNP,POLR3A,AP4E1,WDR45,SMC3,MRPL3,CDC6,HELLS,B4GALT7,LEMD3,PIK3CA,RAB3GAP2,PEX16,KDM6A,VRK1,POLA1,MPDU1,NDUFAF3,SIN3A,XRCC2,IQCB1,CEP135,KIAA0586,ZBTB24,ALMS1,DKC1,KIF2A,DNA2,QDPR,DNMT3B,RAD21,KRAS,LRPPRC,NDUFAF…
Disease	C3469521	FANCONI ANEMIA, COMPLEMENTATION GROUP A (disorder)	DisGeNET Curated	3.609e-08	0.0002111	2.898e-05	0.0002681	37	252	BRIP1,RNF168,ATAD5,FANCD2,FANCB,MPG,MRE11,MSH2,FANCM,BLZF1,ATF7IP,ATR,NBN,BLM,BRCA1,BRCA2,GPX4,GSK3B,MSH6,SF3B1,EXO1,CDK1,TOP1,TTK,PHF1,USP1,WEE1,WRN,DCLRE1B,XRCC2,MAPK8,EIF2AK2,TET2,RAD18,DNA2,PALB2,FANCI
Disease	C3714756	Intellectual Disability	DisGeNET Curated	3.964e-08	0.0002318	2.898e-05	0.0002681	105	1131	DGCR6,ERCC6,SMC1A,ARID1A,BRWD3,FANCD2,FANCB,ARID1B,NUFIP2,DCAF17,NAA15,ARFGEF2,PHF6,CHD8,ST3GAL3,POMT1,STIL,SETD2,CTCF,SMPD1,UQCRQ,CEP152,EIF3A,SPATA5,PLK4,STAG2,NCOA6,SPAST,ATR,GAMT,PPP1R12A,NAGLU,NBN,NDUFA2,TUBGCP4,NDUFS3,NDUFS8,NEK2,BRAF,BRCA2,SURF1,BUB1,BUB1B,TAF1,TAF2,ASCC3,GPD2,NRAS,NUDT21,CASP2,NSD1,BAZ1B,ADNP,DICER1,OPA1,SIL1,CCNA2,AP4E1,WDR45,GTF2I,SMC3,PPP1R15B,TOP2A,HELLS,CENPE,PIK3CA,…
Disease	C0015625	Fanconi Anemia	DisGeNET Curated	1.074e-07	0.0006279	6.977e-05	0.0006454	39	285	BRIP1,RNF168,ATAD5,MCM4,FANCD2,FANCB,MPG,MRE11,MSH2,FANCM,BLZF1,ATF7IP,ATR,NBN,BLM,BRCA1,BRCA2,GPX4,GSK3B,MSH6,SF3B1,EXO1,CDK1,TOP1,TTK,PHF1,USP1,WEE1,WRN,DCLRE1B,XRCC2,PRKDC,MAPK8,EIF2AK2,TET2,RAD18,DNA2,PALB2,FANCI
Disease	C0035335	Retinoblastoma	DisGeNET Curated	5.557e-07	0.00325	0.0002974	0.002751	58	539	MCM2,LIN9,TRIM59,FANCB,MIB1,MKI67,CUL2,MRPL28,MSH2,SKP2,ELOF1,CTCF,SP1,ARID4B,ATR,NUP205,BRCA1,BRAF,BRCA2,DICER1,TFDP1,EXO1,CDK1,HELLS,NOLC1,TRIP11,PIK3CA,MED23,KDM6A,SMURF2,VHL,VRK1,WEE1,SIN3A,OTUD4,MAPK8,RB1CC1,DDX3X,PRDM2,KIF14,DEK,NUP153,DNMT1,KPNA2,KRAS,KDM5A,RBBP4,RBBP6,RBL1,REL,E2F3,INTS6,ELF1,ELK3,ENDOG,RPE,MTDH,MAD2L1

## Sheet: Supplementary Table 2
Category	ID	Name	Source	p-value	q-value Bonferroni	q-value FDR B&H	q-value FDR B&Y	Hit Count in Query List	Hit Count in Genome	Hit in Query List
GO: Molecular Function	GO:0005319	lipid transporter activity		3.242e-17	3.625e-14	3.625e-14	2.754e-13	23	118	AKR1C4,FABP1,ABCB4,NPC1L1,GLTPD2,APOA1,APOA2,APOA4,APOB,APOC4,SLCO1B1,SLC10A1,MTTP,ABCB11,CFHR4,APOM,ABCG5,ABCG8,SLC27A5,APOA5,RBP4,SLC22A9,SLC10A5
GO: Molecular Function	GO:0004497	monooxygenase activity		8.187e-17	9.153e-14	4.576e-14	3.477e-13	21	97	FMO5,CYP3A43,CYP4F2,CYP4F12,CYP3A7,CYP2B6,CYP2C19,CYP2C8,CYP2C9,CYP2C18,CYP2D6,CYP2E1,CYP3A4,CYP3A5,CYP4A11,CYP7A1,CYP8B1,CYP4A22,PAH,CYP4F3,PCBD1
GO: Molecular Function	GO:0008289	lipid binding		3.478e-16	3.888e-13	1.296e-13	9.847e-13	50	701	MBL2,HNF4A,TTPA,F10,FABP1,ADH4,UGT2B4,UGT2B7,UGT2B15,ALB,ALDOB,GLTPD2,VIL1,OXER1,UGT1A6,ANXA13,SHBG,PON1,UGT1A9,APOA1,APOA2,APOA4,APOB,APOC2,APOC3,APOH,CRP,ACOT12,UGT1A4,UGT1A1,UGT1A3,TSPO2,NR5A2,MTTP,CYP4F12,CYP3A4,AKR1D1,GC,APOM,VNN1,C8G,NR1H4,PAQR9,APOA5,RBP4,LBP,SERPINA6,OTC,LIPC,ANXA10
GO: Molecular Function	GO:0019825	oxygen binding		6.594e-16	7.372e-13	1.843e-13	1.4e-12	16	51	ALB,CYP4F12,CYP3A7,CYP2B6,CYP2C19,CYP2C8,CYP2C9,CYP2C18,CYP2D6,CYP2E1,CYP3A4,CYP3A5,CYP4A11,CYP8B1,HAAO,CYP4F3
GO: Molecular Function	GO:0008391	arachidonic acid monooxygenase activity		1.31e-14	1.465e-11	2.441e-12	1.855e-11	10	15	CYP4F2,CYP4F12,CYP2B6,CYP2C19,CYP2C8,CYP2C9,CYP2C18,CYP2D6,CYP2E1,CYP4A11
GO: Molecular Function	GO:0008392	arachidonic acid epoxygenase activity		1.31e-14	1.465e-11	2.441e-12	1.855e-11	10	15	CYP4F2,CYP4F12,CYP2B6,CYP2C19,CYP2C8,CYP2C9,CYP2C18,CYP2D6,CYP2E1,CYP4A11
GO: Molecular Function	GO:0020037	heme binding		4.8e-14	5.366e-11	7.666e-12	5.824e-11	21	131	HPX,HRG,AMBP,CYP3A43,CYP4F2,CYP4F12,CYP3A7,CYP2B6,CYP2C19,CYP2C8,CYP2C9,CYP2C18,CYP2D6,CYP2E1,CYP3A4,CYP3A5,CYP4A11,CYP7A1,CYP8B1,CYP4A22,CYP4F3
GO: Molecular Function	GO:0046906	tetrapyrrole binding		1.865e-13	2.085e-10	2.606e-11	1.98e-10	21	140	HPX,HRG,AMBP,CYP3A43,CYP4F2,CYP4F12,CYP3A7,CYP2B6,CYP2C19,CYP2C8,CYP2C9,CYP2C18,CYP2D6,CYP2E1,CYP3A4,CYP3A5,CYP4A11,CYP7A1,CYP8B1,CYP4A22,CYP4F3
GO: Molecular Function	GO:0031406	carboxylic acid binding		6.19e-13	6.921e-10	7.69e-11	5.842e-10	26	240	MAT1A,HNF4A,FABP1,PHYH,AGXT,UGT2B4,UGT2B7,UGT2B15,ALB,VIL1,OXER1,UGT1A6,ANXA13,UGT1A9,UGT1A4,UGT1A1,UGT1A3,CYP4F12,FTCD,DDC,NR1H4,GOT1,DPYS,OTC,PAH,PCK1
GO: Molecular Function	GO:0043177	organic acid binding		8.274e-13	9.25e-10	9.25e-11	7.027e-10	26	243	MAT1A,HNF4A,FABP1,PHYH,AGXT,UGT2B4,UGT2B7,UGT2B15,ALB,VIL1,OXER1,UGT1A6,ANXA13,UGT1A9,UGT1A4,UGT1A1,UGT1A3,CYP4F12,FTCD,DDC,NR1H4,GOT1,DPYS,OTC,PAH,PCK1
GO: Biological Process	GO:0006082	organic acid metabolic process		3.719e-50	1.615e-46	1.615e-46	1.446e-45	111	1131	HGD,HK1,ACADS,MAT1A,ALDH8A1,PIPOX,AKR1C4,HAO1,ACY1,TST,HNF4A,FABP1,ADH1C,CHST13,PRODH2,PHYH,HPD,AGT,AGXT,PKLR,UGT2B4,UGT2B7,UGT2B10,UGT2B15,ACAA2,FGFR4,ALDOB,MPST,HYAL1,UGT1A6,UGT1A5,PON1,UGT1A9,APOA1,APOA2,APOA4,CYP4F2,SCLY,APOC2,APOC3,SLCO1B1,ACOT12,ARG1,UGT1A4,UGT1A1,UGT1A3,AGXT2,SEPHS2,SLC17A1,ASL,NR5A2,ABCB11,DECR2,CYP4F12,G6PC,SLC37A4,PECR,CYP2B6,CYP2C19,UPB1,CYP2C8,CYP2C9,CYP2C18,CYP2D6,CY…
GO: Biological Process	GO:0043436	oxoacid metabolic process		2.914e-47	1.266e-43	5.364e-44	4.803e-43	107	1114	HGD,HK1,ACADS,MAT1A,ALDH8A1,PIPOX,AKR1C4,HAO1,ACY1,HNF4A,FABP1,ADH1C,CHST13,PRODH2,PHYH,HPD,AGT,AGXT,PKLR,UGT2B4,UGT2B7,UGT2B10,UGT2B15,ACAA2,FGFR4,ALDOB,MPST,HYAL1,UGT1A6,UGT1A5,PON1,UGT1A9,APOA1,APOA2,APOA4,CYP4F2,SCLY,APOC2,APOC3,SLCO1B1,ACOT12,ARG1,UGT1A4,UGT1A1,UGT1A3,AGXT2,SEPHS2,ASL,NR5A2,ABCB11,DECR2,CYP4F12,SLC37A4,PECR,CYP2B6,CYP2C19,UPB1,CYP2C8,CYP2C9,CYP2C18,CYP2D6,CYP2E1,CYP4A11,CYP7…
GO: Biological Process	GO:0019752	carboxylic acid metabolic process		3.705e-47	1.609e-43	5.364e-44	4.803e-43	102	1003	HGD,HK1,ACADS,MAT1A,ALDH8A1,PIPOX,AKR1C4,HAO1,ACY1,HNF4A,FABP1,ADH1C,PRODH2,PHYH,HPD,AGT,AGXT,PKLR,UGT2B4,UGT2B7,UGT2B10,UGT2B15,ACAA2,FGFR4,ALDOB,MPST,UGT1A6,UGT1A5,PON1,UGT1A9,APOA1,APOA2,APOA4,CYP4F2,SCLY,APOC2,APOC3,SLCO1B1,ACOT12,ARG1,UGT1A4,UGT1A1,UGT1A3,AGXT2,SEPHS2,ASL,NR5A2,ABCB11,DECR2,CYP4F12,SLC37A4,PECR,CYP2B6,CYP2C19,UPB1,CYP2C8,CYP2C9,CYP2C18,CYP2D6,CYP2E1,CYP4A11,CYP7A1,CYP8B1,BAA…
GO: Biological Process	GO:0032787	monocarboxylic acid metabolic process		2.763e-43	1.2e-39	3.001e-40	2.687e-39	79	617	HK1,ACADS,ALDH8A1,AKR1C4,HAO1,HNF4A,FABP1,ADH1C,PHYH,AGT,AGXT,PKLR,UGT2B4,UGT2B7,UGT2B10,UGT2B15,ACAA2,FGFR4,ALDOB,UGT1A6,UGT1A5,UGT1A9,APOA1,APOA2,APOA4,CYP4F2,APOC2,APOC3,SLCO1B1,ACOT12,UGT1A4,UGT1A1,UGT1A3,AGXT2,NR5A2,ABCB11,DECR2,CYP4F12,SLC37A4,PECR,CYP2B6,CYP2C19,CYP2C8,CYP2C9,CYP2C18,CYP2D6,CYP2E1,CYP4A11,CYP7A1,CYP8B1,BAAT,UGT3A1,AKR1D1,DAO,UROC1,FTCD,SULT2A1,VNN1,ANGPTL3,KHK,XYLB,NR1H4,S…
GO: Biological Process	GO:0006629	lipid metabolic process		2.568e-33	1.115e-29	2.231e-30	1.998e-29	100	1377	AADAC,ACADS,ALDH8A1,AKR1C4,HMGCS2,HAO1,TM6SF2,FOXA2,HNF4A,TTPA,TTR,FABP1,ABCB4,ADH1C,ADH4,PHYH,AGT,NPC1L1,UGT2B4,UGT2B7,UGT2B10,UGT2B15,ACAA2,FGFR4,FGL1,HSD17B2,NR0B2,ENPP7,ANG,UGT1A6,PON1,SHH,UGT1A9,APOA1,APOA2,APOA4,CYP4F2,APOB,SCLY,APOC2,APOC3,APOC4,APOH,SLCO1B1,ACOT12,UGT1A4,UGT1A1,UGT1A3,GBA3,IGF1R,ARSE,NR5A2,MTTP,ABCB11,DECR2,CYP4F12,G6PC,MOGAT3,SLC37A4,PECR,CYP2B6,CYP2C19,CYP2C8,CYP2C9,CYP…
GO: Biological Process	GO:0008202	steroid metabolic process		9.462e-31	4.11e-27	6.851e-28	6.134e-27	49	314	AKR1C4,HMGCS2,FOXA2,AGT,NPC1L1,UGT2B4,UGT2B7,UGT2B15,ACAA2,FGFR4,FGL1,HSD17B2,NR0B2,PON1,SHH,APOA1,APOA2,APOA4,APOB,SLCO1B1,UGT1A1,IGF1R,NR5A2,MTTP,ABCB11,G6PC,SLC37A4,CYP2B6,CYP2C19,CYP2C9,CYP2D6,CYP2E1,CYP3A4,CYP3A5,CYP7A1,CYP8B1,BAAT,AKR1D1,GC,NR1I2,SULT2A1,ANGPTL3,NR1H4,SLC27A5,HNF1A,APOA5,SERPINA6,LIPC,HSD17B11
GO: Biological Process	GO:0006805	xenobiotic metabolic process		7.135e-26	3.099e-22	4.427e-23	3.964e-22	28	96	NAT2,AADAC,ACY1,HNF4A,UGT2B4,UGT2B15,UGT1A6,UGT1A5,UGT1A9,UGT1A4,UGT1A1,UGT1A3,AKR7L,AKR7A3,CYP3A7,CYP2B6,CYP2C19,CYP2C8,CYP2C9,CYP2C18,CYP2D6,CYP2E1,CYP3A4,CYP3A5,ACY3,CES2,NR1I2,ACSM2B
GO: Biological Process	GO:0071466	cellular response to xenobiotic stimulus		3.457e-25	1.502e-21	1.877e-22	1.681e-21	28	101	NAT2,AADAC,ACY1,HNF4A,UGT2B4,UGT2B15,UGT1A6,UGT1A5,UGT1A9,UGT1A4,UGT1A1,UGT1A3,AKR7L,AKR7A3,CYP3A7,CYP2B6,CYP2C19,CYP2C8,CYP2C9,CYP2C18,CYP2D6,CYP2E1,CYP3A4,CYP3A5,ACY3,CES2,NR1I2,ACSM2B
GO: Biological Process	GO:0044282	small molecule catabolic process		1.509e-24	6.556e-21	6.632e-22	5.938e-21	46	370	HGD,HK1,ACADS,GLYCTK,PIPOX,HAO1,FABP1,ADH1C,ADH4,PRODH2,PHYH,HPD,AGXT,PKLR,ACAA2,ALDOB,ENPP7,PON1,CYP4F2,ARG1,AGXT2,ASL,CYP4F12,CYP4A11,CYP7A1,AKR1D1,DAO,UROC1,FTCD,BHMT,SULT2A1,KHK,XYLB,GOT1,GPT,AMDHD1,ECHS1,OTC,LIPC,OXCT1,EHHADH,PAH,HAAO,CYP4F3,ACMSD,PCBD1
GO: Biological Process	GO:0055088	lipid homeostasis		1.527e-24	6.632e-21	6.632e-22	5.938e-21	30	128	ACADS,HNF4A,ABCB4,NPC1L1,FGFR4,APOA1,APOA2,APOA4,APOB,APOC2,APOC3,APOC4,ASGR2,NR5A2,MTTP,G6PC,SLC37A4,CYP7A1,GCKR,APOM,PLA2G12B,ANGPTL3,ABCG5,ABCG8,NR1H4,GOT1,APOA5,MLXIPL,LIPC,ACSM2A
GO: Cellular Component	GO:0005615	extracellular space		2.525e-32	8.282e-30	8.282e-30	5.277e-29	101	1449	CFHR1,IL32,MBL2,TST,F2,F5,TTR,F9,F11,F12,SERPINA1,SAA4,SERPINA4,AFM,HPR,AGT,HPX,FGA,FGB,AHSG,HRG,ALB,CCL15,CCL16,FGG,FGL1,PLG,SERPINF2,HFE2,AMBP,VTN,ANG,HYAL1,ANXA13,PON1,APCS,SHH,APOA1,APOA2,APOA4,CPB2,APOB,APOC2,APOC3,CPN1,APOC4,CPN2,MUC13,APOH,SEMA4G,CRP,ARG1,MST1,C3P1,IGFBP1,SERPINC1,IHH,PROC,SPINK1,INHBC,GC,ITIH1,ITIH2,ITIH4,CES2,CFHR3,APOM,LIME1,VNN1,FGF21,ANGPTL3,C4BPA,C4BPB,C6,C8A,C8B,C8G…
GO: Cellular Component	GO:0072562	blood microparticle		1.542e-30	5.057e-28	2.528e-28	1.611e-27	36	143	CFHR1,F2,AFM,HPR,AGT,HPX,FGA,FGB,AHSG,HRG,ALB,FGG,PLG,SERPINF2,AMBP,VTN,PON1,APCS,APOA1,APOA2,APOA4,CPN2,SERPINC1,GC,ITIH1,ITIH2,ITIH4,CFHR3,C4BPA,C8A,C8G,C9,KNG1,APOA5,ORM1,ORM2
GO: Cellular Component	GO:0060205	cytoplasmic vesicle lumen		2.478e-17	8.127e-15	2.709e-15	1.726e-14	22	104	F5,SERPINA1,SERPINA4,HPX,FGA,FGB,AHSG,HRG,ALB,FGG,PLG,SERPINF2,APOA1,APOB,APOH,ZG16,SPP2,ITIH3,ITIH4,KNG1,ORM1,ORM2
GO: Cellular Component	GO:0044432	endoplasmic reticulum part		5.028e-17	1.649e-14	3.832e-15	2.442e-14	68	1177	AADAC,TMED6,TM6SF2,F2,F5,F9,F10,SERPINA1,MIA2,HPD,UGT2B4,UGT2B7,UGT2B10,UGT2B15,HSD17B2,ALDOB,VTN,FMO5,CYP3A43,UGT1A6,SHH,UGT1A9,APOA1,APOA2,APOA4,CYP4F2,APOB,ABCC6,UGT1A4,UGT1A1,UGT1A3,ARSE,TSPO2,MTTP,CYP4F12,G6PC,MOGAT3,SLC37A4,PROC,CYP3A7,CYP2B6,CYP2C19,CYP2C8,CYP2C9,CYP2C18,CYP2D6,CYP2E1,CYP3A4,CYP3A5,CYP4A11,CYP7A1,CYP8B1,UGT3A1,FTCD,ANKS4B,MBOAT2,CES2,GJB1,PROZ,PCYT2,CREB3L3,SLC27A5,SEC16B,…
GO: Cellular Component	GO:0031983	vesicle lumen		5.842e-17	1.916e-14	3.832e-15	2.442e-14	22	108	F5,SERPINA1,SERPINA4,HPX,FGA,FGB,AHSG,HRG,ALB,FGG,PLG,SERPINF2,APOA1,APOB,APOH,ZG16,SPP2,ITIH3,ITIH4,KNG1,ORM1,ORM2
GO: Cellular Component	GO:0034358	plasma lipoprotein particle		2.404e-16	7.885e-14	1.126e-14	7.178e-14	15	40	SAA4,HPR,PON1,APOA1,APOA2,APOA4,APOB,APOC2,APOC3,APOC4,APOH,APOM,APOA5,LIPC,LPA
GO: Cellular Component	GO:1990777	lipoprotein particle		2.404e-16	7.885e-14	1.126e-14	7.178e-14	15	40	SAA4,HPR,PON1,APOA1,APOA2,APOA4,APOB,APOC2,APOC3,APOC4,APOH,APOM,APOA5,LIPC,LPA
GO: Cellular Component	GO:0032994	protein-lipid complex		5.7e-16	1.87e-13	2.337e-14	1.489e-13	15	42	SAA4,HPR,PON1,APOA1,APOA2,APOA4,APOB,APOC2,APOC3,APOC4,APOH,APOM,APOA5,LIPC,LPA
GO: Cellular Component	GO:0034364	high-density lipoprotein particle		8.162e-16	2.677e-13	2.974e-14	1.895e-13	13	28	SAA4,HPR,PON1,APOA1,APOA2,APOA4,APOC2,APOC3,APOC4,APOH,APOM,APOA5,LIPC
GO: Cellular Component	GO:0034774	secretory granule lumen		1.292e-15	4.239e-13	4.239e-14	2.701e-13	19	85	F5,SERPINA1,SERPINA4,FGA,FGB,AHSG,HRG,ALB,FGG,PLG,SERPINF2,APOA1,APOH,SPP2,ITIH3,ITIH4,KNG1,ORM1,ORM2
Human Phenotype	HP:0005543	Reduced protein C activity		5.284e-09	8.417e-06	5.208e-06	4.141e-05	8	16	F2,F5,F12,FGA,FGB,FGG,SERPINC1,PROC
Human Phenotype	HP:0002910	Elevated hepatic transaminases		6.539e-09	1.042e-05	5.208e-06	4.141e-05	33	375	F2,HNF4A,F5,F9,ABCB4,SERPINA1,FGA,FGB,FGG,ALDOB,SLC30A10,HFE2,UGT1A6,UGT1A5,SHH,UGT1A9,UGT1A4,UGT1A3,MST1,MTTP,ABCB11,G6PC,SLC37A4,AKR1D1,NR1H4,HNF1A,HNF1B,RBP4,TFR2,OTC,EHHADH,SLC25A13,GYS2
Human Phenotype	HP:0011901	Dysfibrinogenemia		2.236e-08	3.562e-05	1.187e-05	9.441e-05	5	5	F12,FGA,FGB,FGG,SERPINC1
Human Phenotype	HP:0100724	Hypercoagulability		4.281e-08	6.82e-05	1.705e-05	0.0001356	18	132	F2,F5,F9,F12,FGA,FGB,HRG,FGG,UGT1A6,UGT1A5,UGT1A9,UGT1A4,UGT1A3,MTTP,ABCB11,SERPINC1,PROC,HNF1B
Human Phenotype	HP:0008151	Prolonged prothrombin time		6.018e-08	9.587e-05	1.917e-05	0.0001525	9	28	F2,F5,F9,F10,FGA,FGB,FGG,MST1,NR1H4
Human Phenotype	HP:0001394	Cirrhosis		7.779e-08	0.0001239	2.065e-05	0.0001642	24	237	F2,F5,F9,ABCB4,SERPINA1,FGA,FGB,FGG,ABCC2,ALDOB,SLC30A10,HFE2,UGT1A6,UGT1A5,UGT1A9,UGT1A4,UGT1A3,MST1,MTTP,ABCB11,AKR1D1,NR1H4,TFR2,SLC25A13
Human Phenotype	HP:0001923	Reticulocytosis		2.502e-07	0.0003985	5.066e-05	0.0004028	13	76	CFHR1,HK1,PKLR,UGT1A6,UGT1A5,UGT1A9,UGT1A4,UGT1A3,ABCB11,BAAT,CFHR3,ABCG5,ABCG8
Human Phenotype	HP:0005542	Prolonged whole-blood clotting time		2.544e-07	0.0004052	5.066e-05	0.0004028	6	11	F5,F9,F12,FGA,FGB,FGG
Human Phenotype	HP:0003563	Decreased circulating low-density lipoprotein levels		4.964e-07	0.0007907	7.938e-05	0.0006312	6	12	APOB,APOC3,MTTP,ANGPTL3,CREB3L3,APOA5
Human Phenotype	HP:0003645	Prolonged partial thromboplastin time		4.983e-07	0.0007938	7.938e-05	0.0006312	8	26	F2,F5,F9,F10,F11,F12,KLKB1,KNG1
Mouse Phenotype	MP:0005370	liver/biliary system phenotype		3.16e-18	9.36e-15	9.36e-15	8.023e-14	77	1284	HGD,HK1,ACADS,MAT1A,PDZK1,TM6SF2,FOXA2,HNF4A,ONECUT1,F5,PANK1,F11,FABP1,ABCB4,PHYH,AGT,NPC1L1,HPX,FGA,ALB,FGFR4,FGL1,ABCC2,PLG,ALDOB,NR0B2,HFE2,ONECUT2,HYAL1,APOA1,APOB,SLC2A2,ARG1,MST1,IGF1R,IGFBP1,ASGR1,SLC22A1,NR5A2,MTTP,ABCB11,SERPINC1,G6PC,SLC37A4,PROC,CYP2E1,CYP7A1,CYP8B1,GATA4,PDX1,SLC26A1,ITIH4,BHMT,GJB1,NR1I2,PLA2G12B,FGF21,ANGPTL3,PXMP2,PCYT2,SLC39A5,ABCG5,ABCG8,NR1H4,SLC27A5,HNF1A,HNF1…
Mouse Phenotype	MP:0002139	abnormal hepatobiliary system physiology		3.499e-17	1.037e-13	5.183e-14	4.442e-13	43	442	HGD,MAT1A,ONECUT1,PANK1,FABP1,ABCB4,PHYH,HPX,ALB,ABCC2,PLG,ALDOB,NR0B2,APOA1,IGF1R,IGFBP1,ASGR1,SLC22A1,NR5A2,MTTP,ABCB11,SERPINC1,PROC,CYP7A1,CYP8B1,SLC26A1,ITIH4,GJB1,NR1I2,FGF21,ANGPTL3,PXMP2,ABCG5,ABCG8,NR1H4,SLC27A5,HNF1A,HNF1B,LBP,LECT2,MLXIPL,GYS2,HABP2
Mouse Phenotype	MP:0000598	abnormal liver morphology		9.05e-17	2.681e-13	8.936e-14	7.659e-13	67	1060	HGD,HK1,ACADS,MAT1A,PDZK1,TM6SF2,FOXA2,HNF4A,ONECUT1,F5,PANK1,F11,FABP1,ABCB4,PHYH,AGT,NPC1L1,FGA,ALB,FGL1,ABCC2,PLG,ALDOB,NR0B2,HFE2,ONECUT2,HYAL1,APOA1,APOB,SLC2A2,ARG1,MST1,IGF1R,IGFBP1,NR5A2,MTTP,ABCB11,SERPINC1,G6PC,SLC37A4,PROC,CYP2E1,CYP7A1,GATA4,PDX1,SLC26A1,BHMT,GJB1,PLA2G12B,FGF21,ANGPTL3,PCYT2,SLC39A5,ABCG5,NR1H4,SLC27A5,HNF1A,HNF1B,LECT2,TFR2,MLXIPL,OTC,EHHADH,SLC25A13,GYS2,HABP2,PCK1
Mouse Phenotype	MP:0003947	abnormal cholesterol level		1.378e-16	4.08e-13	1.02e-13	8.743e-13	48	571	MGAT4B,ACADS,PDZK1,TM6SF2,HNF4A,ABCB4,PHYH,NPC1L1,ALB,FGG,FGL1,ABCC2,PLG,NR0B2,FMO5,PON1,APOA1,APOA2,APOA4,APOB,APOC2,APOC4,ABCC6,SLC2A2,CRP,NR5A2,MTTP,ABCB11,G6PC,SLC37A4,CYP8B1,GC,BHMT,APOM,PLA2G12B,FGF21,ANGPTL3,PCYT2,ABCG5,ABCG8,NR1H4,SLC27A5,SEC16B,HNF1A,HNF1B,APOA5,MLXIPL,LIPC
Mouse Phenotype	MP:0005278	abnormal cholesterol homeostasis		2.095e-16	6.206e-13	1.241e-13	1.064e-12	48	577	MGAT4B,ACADS,PDZK1,TM6SF2,HNF4A,ABCB4,PHYH,NPC1L1,ALB,FGG,FGL1,ABCC2,PLG,NR0B2,FMO5,PON1,APOA1,APOA2,APOA4,APOB,APOC2,APOC4,ABCC6,SLC2A2,CRP,NR5A2,MTTP,ABCB11,G6PC,SLC37A4,CYP8B1,GC,BHMT,APOM,PLA2G12B,FGF21,ANGPTL3,PCYT2,ABCG5,ABCG8,NR1H4,SLC27A5,SEC16B,HNF1A,HNF1B,APOA5,MLXIPL,LIPC
Mouse Phenotype	MP:0000187	abnormal triglyceride level		3.931e-16	1.164e-12	1.395e-13	1.196e-12	44	494	TM6SF2,FOXA2,HNF4A,PANK1,FABP1,PHYH,RIMKLB,NPC1L1,AHSG,ALB,FGL1,NR0B2,ALPI,A1CF,FMO5,APOA1,APOA4,APOB,APOC2,APOC4,SLC2A2,CRP,NR5A2,MTTP,G6PC,SLC37A4,GC,BHMT,APOM,PLA2G12B,FGF21,ANGPTL3,PCYT2,ABCG5,ABCG8,NR1I3,NR1H4,SLC27A5,HNF1B,APOA5,LIPC,SLC25A13,GYS2,PCK1
Mouse Phenotype	MP:0002118	abnormal lipid homeostasis		4.05e-16	1.2e-12	1.395e-13	1.196e-12	69	1150	MGAT4B,ACADS,PDZK1,TM6SF2,FOXA2,HNF4A,PANK1,TTPA,FABP1,ABCB4,PHYH,RIMKLB,AGT,NPC1L1,AHSG,ALB,FGG,FGL1,ABCC2,PLG,NR0B2,ALPI,A1CF,FMO5,PON1,SHH,APOA1,APOA2,APOA4,CYP4F2,APOB,APOC2,APOC4,ABCC6,SLC2A2,CRP,ASGR2,NR5A2,MTTP,ABCB11,G6PC,SLC37A4,CYP7A1,CYP8B1,GC,DDC,BHMT,APOM,PLA2G12B,FGF21,ANGPTL3,PCYT2,ABCG5,ABCG8,NR1I3,NR1H4,SLC27A5,SEC16B,HNF1A,HNF1B,APOA5,SERPINA6,MLXIPL,LIPC,OXCT1,EHHADH,SLC25A13,G…
Mouse Phenotype	MP:0012224	abnormal sterol level		4.453e-16	1.319e-12	1.395e-13	1.196e-12	48	588	MGAT4B,ACADS,PDZK1,TM6SF2,HNF4A,ABCB4,PHYH,NPC1L1,ALB,FGG,FGL1,ABCC2,PLG,NR0B2,FMO5,PON1,APOA1,APOA2,APOA4,APOB,APOC2,APOC4,ABCC6,SLC2A2,CRP,NR5A2,MTTP,ABCB11,G6PC,SLC37A4,CYP8B1,GC,BHMT,APOM,PLA2G12B,FGF21,ANGPTL3,PCYT2,ABCG5,ABCG8,NR1H4,SLC27A5,SEC16B,HNF1A,HNF1B,APOA5,MLXIPL,LIPC
Mouse Phenotype	MP:0003949	abnormal circulating lipid level		4.688e-16	1.389e-12	1.395e-13	1.196e-12	59	869	MGAT4B,ACADS,PDZK1,TM6SF2,FOXA2,HNF4A,PANK1,ABCB4,PHYH,RIMKLB,AGT,NPC1L1,AHSG,ALB,FGG,FGL1,ABCC2,PLG,NR0B2,ALPI,FMO5,PON1,SHH,APOA1,APOA2,APOA4,APOB,APOC2,APOC4,ABCC6,CRP,NR5A2,MTTP,G6PC,SLC37A4,CYP8B1,GC,DDC,BHMT,APOM,PLA2G12B,FGF21,ANGPTL3,PCYT2,ABCG5,ABCG8,NR1I3,NR1H4,SLC27A5,SEC16B,HNF1A,HNF1B,APOA5,SERPINA6,MLXIPL,LIPC,SLC25A13,GYS2,PCK1
Mouse Phenotype	MP:0000180	abnormal circulating cholesterol level		4.711e-16	1.395e-12	1.395e-13	1.196e-12	45	519	MGAT4B,ACADS,PDZK1,TM6SF2,HNF4A,ABCB4,PHYH,NPC1L1,ALB,FGG,FGL1,ABCC2,PLG,NR0B2,FMO5,PON1,APOA1,APOA2,APOA4,APOB,APOC2,APOC4,ABCC6,CRP,NR5A2,MTTP,G6PC,SLC37A4,CYP8B1,GC,BHMT,APOM,PLA2G12B,FGF21,ANGPTL3,ABCG5,ABCG8,NR1H4,SLC27A5,SEC16B,HNF1A,HNF1B,APOA5,MLXIPL,LIPC
Domain	PS00086	CYTOCHROME_P450	PROSITE	1.023e-17	1.628e-14	1.16e-14	9.223e-14	18	57	CYP3A43,CYP4F2,CYP4F12,CYP3A7,CYP2B6,CYP2C19,CYP2C8,CYP2C9,CYP2C18,CYP2D6,CYP2E1,CYP3A4,CYP3A5,CYP4A11,CYP7A1,CYP8B1,CYP4A22,CYP4F3
Domain	PF00067	p450	Pfam	1.458e-17	2.32e-14	1.16e-14	9.223e-14	18	58	CYP3A43,CYP4F2,CYP4F12,CYP3A7,CYP2B6,CYP2C19,CYP2C8,CYP2C9,CYP2C18,CYP2D6,CYP2E1,CYP3A4,CYP3A5,CYP4A11,CYP7A1,CYP8B1,CYP4A22,CYP4F3
Domain	IPR001128	Cyt_P450	InterPro	2.897e-17	4.609e-14	1.536e-14	1.221e-13	18	60	CYP3A43,CYP4F2,CYP4F12,CYP3A7,CYP2B6,CYP2C19,CYP2C8,CYP2C9,CYP2C18,CYP2D6,CYP2E1,CYP3A4,CYP3A5,CYP4A11,CYP7A1,CYP8B1,CYP4A22,CYP4F3
Domain	IPR017972	Cyt_P450_CS	InterPro	6.213e-17	9.885e-14	2.471e-14	1.965e-13	17	53	CYP3A43,CYP4F2,CYP4F12,CYP3A7,CYP2B6,CYP2C19,CYP2C8,CYP2C9,CYP2C18,CYP2D6,CYP2E1,CYP3A4,CYP3A5,CYP4A11,CYP7A1,CYP4A22,CYP4F3
Domain	1.10.630.10	-	Gene3D	3.486e-16	5.546e-13	8.933e-14	7.101e-13	17	58	CYP3A43,CYP4F2,CYP4F12,CYP2B6,CYP2C19,CYP2C8,CYP2C9,CYP2C18,CYP2D6,CYP2E1,CYP3A4,CYP3A5,CYP4A11,CYP7A1,CYP8B1,CYP4A22,CYP4F3
Domain	PF00201	UDPGT	Pfam	4.492e-16	7.146e-13	8.933e-14	7.101e-13	12	21	UGT2B4,UGT2B7,UGT2B10,UGT2B15,UGT1A6,UGT1A5,UGT1A9,UGT1A4,UGT1A1,UGT1A3,UGT3A1,UGT2A3
Domain	PS00375	UDPGT	PROSITE	4.492e-16	7.146e-13	8.933e-14	7.101e-13	12	21	UGT2B4,UGT2B7,UGT2B10,UGT2B15,UGT1A6,UGT1A5,UGT1A9,UGT1A4,UGT1A1,UGT1A3,UGT3A1,UGT2A3
Domain	IPR002213	UDP_glucos_trans	InterPro	4.492e-16	7.146e-13	8.933e-14	7.101e-13	12	21	UGT2B4,UGT2B7,UGT2B10,UGT2B15,UGT1A6,UGT1A5,UGT1A9,UGT1A4,UGT1A1,UGT1A3,UGT3A1,UGT2A3
Domain	IPR002401	Cyt_P450_E_grp-I	InterPro	2.238e-15	3.56e-12	3.956e-13	3.144e-12	15	45	CYP3A43,CYP4F2,CYP4F12,CYP3A7,CYP2B6,CYP2C19,CYP2C8,CYP2C9,CYP2C18,CYP2D6,CYP2E1,CYP3A5,CYP4A11,CYP4A22,CYP4F3
Domain	PS50923	SUSHI	PROSITE	4.701e-10	7.48e-07	7.48e-08	5.946e-07	12	56	CFHR1,CFHR2,F13B,HPR,APOH,MASP2,CFHR5,CFHR4,CFHR3,C4BPA,C4BPB,C6
Pathway	1270189	Biological oxidations	BioSystems: REACTOME	6.055e-35	7.079e-32	7.079e-32	5.409e-31	51	229	NAT2,AADAC,MAT1A,ACY1,ADH1A,ADH1C,ADH4,ADH6,UGT2B4,UGT2B7,UGT2B10,UGT2B15,CYP3A43,UGT1A6,UGT1A5,UGT1A9,CYP4F2,UGT1A4,UGT1A1,UGT1A3,AKR7L,AKR7A3,CYP4F12,CYP3A7,CYP2B6,CYP2C19,CYP2C8,CYP2C9,CYP2C18,CYP2D6,CYP2E1,CYP3A4,CYP3A5,CYP4A11,CYP7A1,CYP8B1,ACY3,UGT3A1,SLC26A1,CES2,SULT2A1,NR1H4,PAPSS1,CYP4A22,GSTA1,GSTA2,UGT2A3,CES3,CYP4F3,ACSM2A,ACSM2B
Pathway	132956	Metabolic pathways	BioSystems: KEGG	1.2e-28	1.403e-25	7.013e-26	5.359e-25	101	1272	HGD,NAT2,MGAT4B,HK1,ACADS,MAT1A,GLYCTK,PIPOX,AKR1C4,HMGCS2,HAO1,ACY1,TST,PANK1,ADH1A,ADH1C,ADH4,ADH6,PRODH2,RIMKLB,HPD,AGXT,PKLR,UGT2B4,UGT2B7,UGT2B10,UGT2B15,ACAA2,ALAS1,HSD17B2,ALDOB,ALPI,MPST,ENPP7,HYAL1,UGT1A6,UGT1A5,PON1,UGT1A9,CYP4F2,SCLY,ARG1,UGT1A4,UGT1A1,UGT1A3,GBA3,AGXT2,GDA,SEPHS2,ASL,G6PC,MOGAT3,CYP3A7,CYP2B6,CYP2C19,UPB1,CYP2C8,CYP2C9,CYP2C18,GALM,CYP2E1,CYP3A4,CYP3A5,CYP4A11,CYP7A1,…
Pathway	83073	Complement and coagulation cascades	BioSystems: KEGG	4.66e-27	5.447e-24	1.816e-24	1.388e-23	29	79	MBL2,F2,F5,F9,F10,F11,F12,F13B,SERPINA1,FGA,FGB,FGG,PLG,SERPINF2,VTN,CPB2,SERPINC1,PROC,MASP2,C4BPA,C4BPB,C6,C8A,C8B,C8G,C9,KLKB1,KNG1,SERPIND1
Pathway	673221	Chemical carcinogenesis	BioSystems: KEGG	3.909e-25	4.569e-22	1.142e-22	8.729e-22	28	82	NAT2,ADH1A,ADH1C,ADH4,ADH6,UGT2B4,UGT2B7,UGT2B10,UGT2B15,CYP3A43,UGT1A6,UGT1A5,UGT1A9,UGT1A4,UGT1A1,UGT1A3,CYP3A7,CYP2C19,CYP2C8,CYP2C9,CYP2C18,CYP2E1,CYP3A4,CYP3A5,SULT2A1,GSTA1,GSTA2,UGT2A3
Pathway	83032	Drug metabolism - cytochrome P450	BioSystems: KEGG	1.614e-24	1.887e-21	3.774e-22	2.884e-21	26	70	ADH1A,ADH1C,ADH4,ADH6,UGT2B4,UGT2B7,UGT2B10,UGT2B15,FMO5,UGT1A6,UGT1A5,UGT1A9,UGT1A4,UGT1A1,UGT1A3,CYP2B6,CYP2C19,CYP2C8,CYP2C9,CYP2D6,CYP2E1,CYP3A4,CYP3A5,GSTA1,GSTA2,UGT2A3
Pathway	83031	Metabolism of xenobiotics by cytochrome P450	BioSystems: KEGG	2.026e-22	2.369e-19	3.948e-20	3.017e-19	25	74	ADH1A,ADH1C,ADH4,ADH6,UGT2B4,UGT2B7,UGT2B10,UGT2B15,UGT1A6,UGT1A5,UGT1A9,UGT1A4,UGT1A1,UGT1A3,AKR7A3,CYP2B6,CYP2C9,CYP2D6,CYP2E1,CYP3A4,CYP3A5,SULT2A1,GSTA1,GSTA2,UGT2A3
Pathway	83020	Retinol metabolism	BioSystems: KEGG	3.012e-21	3.521e-18	5.03e-19	3.844e-18	23	65	ADH1A,ADH1C,ADH4,ADH6,UGT2B4,UGT2B7,UGT2B10,UGT2B15,UGT1A6,UGT1A5,UGT1A9,UGT1A4,UGT1A1,UGT1A3,CYP3A7,CYP2B6,CYP2C8,CYP2C9,CYP2C18,CYP3A4,CYP3A5,CYP4A11,UGT2A3
Pathway	1270190	Phase 1 - Functionalization of compounds	BioSystems: REACTOME	9.184e-19	1.074e-15	1.342e-16	1.026e-15	26	111	AADAC,ADH1A,ADH1C,ADH4,ADH6,CYP3A43,CYP4F2,CYP4F12,CYP3A7,CYP2B6,CYP2C19,CYP2C8,CYP2C9,CYP2C18,CYP2D6,CYP2E1,CYP3A4,CYP3A5,CYP4A11,CYP7A1,CYP8B1,CES2,NR1H4,CYP4A22,CES3,CYP4F3
Pathway	1270001	Metabolism of lipids and lipoproteins	BioSystems: REACTOME	1.342e-18	1.568e-15	1.742e-16	1.332e-15	66	816	ACADS,AKR1C4,HMGCS2,FABP1,ABCB4,PHYH,AGT,NPC1L1,ACAA2,ALAS1,ALB,HSD17B2,ALPI,ENPP7,PON1,UGT1A9,APOA1,APOA2,APOA4,CYP4F2,APOB,APOC2,APOC3,APOC4,SLCO1B1,ACOT12,GBA3,SLC10A1,ARSE,MTTP,ABCB11,DECR2,MOGAT3,PECR,CYP2C19,CYP2C8,CYP2C9,CYP4A11,CYP7A1,CYP8B1,BAAT,AKR1D1,MBOAT2,BHMT,PTPN13,SULT2A1,FGF21,ANGPTL3,PCYT2,CREB3L3,ABCG5,ABCG8,NR1H4,SLC27A5,AMN,APOA5,ECHS1,CYP4A22,LIPC,OXCT1,EHHADH,LPA,CES3,CYP4F…
Pathway	SMP00273	Fondaparinux Pathway	SMPDB	6.255e-18	7.313e-15	5.625e-16	4.298e-15	13	18	F2,F9,F10,F11,F12,F13B,FGA,FGB,FGG,PLG,SERPINC1,KLKB1,KNG1
Pubmed	23376485	Proteomic analysis of podocyte exosome-enriched fraction from normal human urine.	Pubmed	2.456e-73	8.044e-69	8.044e-69	8.828e-68	110	1743	CFHR1,HGD,PDZK1,ACY1,TST,F2,TTR,F11,F12,FABP1,ADH6,SERPINA1,SERPINA4,OAF,HPD,AFM,AGT,HPX,FGA,FGB,UGT2B7,AHSG,HRG,ACAA2,ALB,FGG,FGL1,PLG,SERPINF2,ALDOB,AMBP,MPST,VIL1,VTN,ANG,HYAL1,UGT1A6,ANXA13,SHBG,PON1,APCS,UGT1A9,APOA1,APOA2,APOA4,APOC2,APOC3,CPN2,MUC13,APOH,CRP,ARG1,CRYAA,MST1,GDA,AKR7A3,ABCB11,SERPINC1,MASP2,UPB1,GIPC2,GALM,SPP2,CDHR2,INHBC,CYP4A11,ACY3,AKR1D1,GC,CDHR5,PBLD,FTCD,DDC,ITIH1,IT…
Pubmed	14718574	The human plasma proteome: a nonredundant list developed by combination of four separate sources.	Pubmed	8.596e-68	2.815e-63	1.407e-63	1.545e-62	50	166	F2,F5,TTR,F9,F10,F12,F13B,SERPINA1,SAA4,AGT,HPX,FGA,FGB,AHSG,HRG,ALB,SERPINF2,AMBP,VTN,ANXA13,SHBG,PON1,APCS,APOA1,APOA2,APOA4,APOB,APOC2,APOC3,APOH,CRP,IGFBP1,SERPINC1,PROC,GC,ITIH1,ITIH2,ITIH3,ITIH4,C4BPA,C4BPB,KLKB1,KNG1,SERPINA7,RBP4,LBP,ORM1,LPA,HABP2,SERPIND1
Pubmed	16335952	Human plasma N-glycoproteome analysis by immunoaffinity subtraction, hydrazide chemistry, and mass spectrometry.	Pubmed	4.906e-67	1.606e-62	5.355e-63	5.876e-62	56	257	CFHR1,F2,F5,TTR,F11,F12,F13B,SERPINA1,SAA4,SERPINA4,AFM,AGT,HPX,FGA,FGB,AHSG,UGT2B10,HRG,FGG,SERPINF2,VTN,SHBG,PON1,APCS,SHH,CPB2,APOB,APOC4,CPN2,APOH,MST1,ASGR2,SERPINC1,IHH,PROC,CDHR5,ITIH2,ITIH3,ITIH4,APOM,VNN1,ANGPTL3,C4BPA,C4BPB,C6,C8A,C8B,C9,KLKB1,KNG1,SERPINA7,SERPINA6,ORM1,ORM2,SERPINA10,SERPIND1
Pubmed	23533145	In-depth proteomic analyses of exosomes isolated from expressed prostatic secretions in urine.	Pubmed	6.572e-57	2.152e-52	5.38e-53	5.904e-52	79	1068	HGD,AKR1C4,ACY1,F2,TTR,F9,F12,FABP1,ABCB4,SERPINA1,SAA4,SERPINA4,AFM,HPR,AGT,HPX,FGA,FGB,AHSG,HRG,ALB,FGG,PLG,SERPINF2,ALDOB,AMBP,MPST,VTN,HYAL1,SHBG,PON1,APCS,APOA1,APOA2,APOA4,CPB2,APOB,APOC3,CPN2,APOH,AKR7L,AKR7A3,SERPINC1,MASP2,SPINK1,CDHR2,GC,CDHR5,PBLD,ITIH1,ITIH2,ITIH3,ITIH4,BHMT,CFHR3,PROZ,C6,C8A,C8B,C8G,C9,KLKB1,TTC38,KNG1,GOT1,SERPINA7,RBP4,REG1A,LBP,SERPINA6,GSTA1,GSTA2,ORM1,ORM2,GUCA2…
Pubmed	24816252	An atlas of genetic influences on human blood metabolites.	Pubmed	1.4e-45	4.583e-41	9.166e-42	1.006e-40	39	191	NAT2,ACADS,AKR1C4,F12,AGXT,UGT1A6,UGT1A5,UGT1A9,SLCO1B1,UGT1A4,UGT1A1,UGT1A3,GBA3,SLC17A1,SLC22A1,CYP2C19,CYP2C8,CYP2C9,CYP3A5,CYP4A11,UGT3A1,AKR1D1,GCKR,DDC,BHMT,SULT2A1,ANGPTL3,KLKB1,NR1I3,KNG1,APOA5,SLC17A4,NAT8,SLC7A9,LIPC,PAH,ACMSD,ACSM2A,HAO2
Pubmed	20679960	Pharmacogenetic analysis of lipid responses to rosuvastatin in Chinese patients.	Pubmed	2.041e-45	6.684e-41	1.017e-41	1.116e-40	29	66	NAT2,NPC1L1,UGT2B7,ACAA2,ABCC2,UGT1A6,PON1,APOA2,APOB,SLCO1B1,CRP,UGT1A1,SLC10A1,SLC22A1,CYP2C19,CYP2C9,CYP2D6,CYP3A4,CYP3A5,GCKR,ANGPTL3,ABCG5,ABCG8,HNF1A,APOA5,MLXIPL,LIPC,LPA,ACSM2B
Pubmed	19343046	Association study between single-nucleotide polymorphisms in 199 drug-related genes and commonly measured quantitative traits of 752 healthy Japanese subjects.	Pubmed	2.175e-45	7.122e-41	1.017e-41	1.116e-40	39	193	NAT2,AADAC,ALDH8A1,ABCB4,ADH1A,ADH1C,ADH4,ADH6,UGT2B4,UGT2B7,UGT2B15,ABCC2,CYP3A43,CYP4F2,SLCO1B1,ABCC6,UGT1A1,SLC10A1,SLC22A1,ABCB11,CYP3A7,CYP2B6,CYP2C19,CYP2C8,CYP2C9,CYP2D6,CYP2E1,CYP3A4,CYP3A5,CYP4A11,CYP7A1,SLC22A7,CES2,SULT2A1,ABCG5,ABCG8,GSTA1,GSTA2,CYP4F3
Pubmed	22516433	Proteomic analysis of microvesicles from plasma of healthy donors reveals high individual variability.	Pubmed	5.081e-44	1.664e-39	2.08e-40	2.283e-39	35	143	CFHR1,F2,AFM,HPR,AGT,HPX,FGA,FGB,AHSG,HRG,ALB,FGG,PLG,SERPINF2,AMBP,VTN,PON1,APCS,APOA1,APOA2,APOA4,CPN2,SERPINC1,GC,ITIH1,ITIH2,ITIH4,CFHR3,C4BPA,C8A,C8G,C9,KNG1,ORM1,ORM2
Pubmed	19056867	Large-scale proteomics and phosphoproteomics of urinary exosomes.	Pubmed	2.257e-36	7.391e-32	8.212e-33	9.012e-32	59	1017	HGD,PDZK1,ALDH8A1,ACY1,F11,FABP1,ADH6,SERPINA1,SERPINA4,HPD,HPX,PKLR,FGA,AHSG,HRG,ALB,FGG,AMBP,MPST,VIL1,ANXA13,APCS,SLC5A9,APOA1,APOA2,ARSE,ASL,AKR7A3,ABCB11,MASP2,UPB1,GIPC2,GALM,CDHR2,ACY3,CDHR5,PBLD,FTCD,DDC,ITIH4,PTPN13,PROZ,CLRN3,KHK,C9,SLC23A1,SLC39A5,KNG1,GOT1,SERPINA7,DPYS,AMN,GPT,RBP4,LBP,GSTA1,TREH,PCBD1,PCK1
Pubmed	14760718	Screening for N-glycosylated proteins by liquid chromatography mass spectrometry.	Pubmed	2.175e-33	7.123e-29	7.123e-30	7.816e-29	21	47	F2,TTR,F12,SERPINA1,AFM,HPX,AHSG,FGG,VTN,PON1,APOB,CPN2,APOH,SERPINC1,ITIH1,ITIH4,C9,KNG1,SERPINA6,ORM1,ORM2
Interaction	int:F2	F2 interactions		3.882e-14	1.486e-10	1.486e-10	1.312e-09	14	44	F2,F5,F9,F11,FGA,ALB,AMBP,CPB2,SERPINC1,PROC,PROZ,C6,KNG1,SERPIND1
Interaction	int:GDPD1	GDPD1 interactions		1.501e-12	5.747e-09	2.874e-09	2.537e-08	11	28	SERPINA1,HPX,AHSG,ALB,APOA1,APOA2,APOA4,ITIH2,KNG1,ORM1,ORM2
Interaction	int:ALB	ALB interactions		4.309e-11	1.65e-07	5.5e-08	4.855e-07	22	203	F2,FOXA3,TTR,MIA2,HPX,FGA,AHSG,ALB,AMBP,PON1,APOA1,APOA2,APOA4,APOC2,APOC3,CRYAA,NR5A2,ITIH1,HNF1A,RBP4,ORM1,SLC25A13
Interaction	int:VKORC1	VKORC1 interactions		2.176e-09	8.332e-06	2.083e-06	1.839e-05	14	93	TMEM176A,SERPINA1,HPR,AHSG,FGG,FGL1,APOA1,APOA2,APOC3,APOC4,ASGR1,ASGR2,GJB1,METTL7B
Interaction	int:SERPINA5	SERPINA5 interactions		9.554e-09	3.658e-05	7.317e-06	6.459e-05	9	34	F2,F10,F11,MIA2,FGA,FGB,FGG,PROC,KLKB1
Interaction	int:SNX27	SNX27 interactions		1.787e-08	6.841e-05	1.14e-05	0.0001007	12	76	TTR,SERPINA1,HPX,FGA,FGB,AHSG,ALB,FGG,APOA1,APOA4,KNG1,ORM1
Interaction	int:FGA	FGA interactions		6.098e-08	0.0002335	3.335e-05	0.0002944	8	30	F2,FGA,FGB,HRG,ALB,FGG,SERPINF2,APOA1
Interaction	int:KNG1	KNG1 interactions		2.421e-07	0.0009269	0.0001159	0.001023	9	48	F2,F11,AGT,PLG,VTN,CPN1,KLKB1,KNG1,HABP2
Interaction	int:PROS1	PROS1 interactions		4.526e-07	0.001733	0.0001926	0.0017	6	17	F2,F5,F10,PROC,C4BPA,C4BPB
Interaction	int:C8A	C8A interactions		6.178e-07	0.002366	0.0002326	0.002053	4	5	C8A,C8B,C8G,C9
Cytoband	7q21.1	7q21.1		7.925e-07	0.0001981	0.0001359	0.0008289	4	8	ABCB4,CYP3A43,CYP3A4,CYP3A5
Cytoband	2q37	2q37		1.087e-06	0.0002717	0.0001359	0.0008289	6	33	UGT1A6,UGT1A5,UGT1A9,UGT1A4,UGT1A1,UGT1A3
Cytoband	3p21.1	3p21.1		7.192e-06	0.001798	0.0005994	0.003657	6	45	GLYCTK,ACY1,ALAS1,ITIH1,ITIH3,ITIH4
Cytoband	4q28	4q28		9.058e-05	0.02264	0.005661	0.03454	3	9	FGA,FGB,FGG
Cytoband	1q32	1q32		0.0001581	0.03951	0.007903	0.04821	5	49	CFHR1,CFHR4,CFHR3,C4BPA,C4BPB
Cytoband	4q13	4q13		0.0004683	0.1171	0.01694	0.1034	3	15	UGT2B4,UGT2B7,UGT2B15
Cytoband	10q24	10q24		0.0004744	0.1186	0.01694	0.1034	4	35	ABCC2,CYP2C19,CYP2C9,CYP2C18
Cytoband	10q22	10q22		0.0009669	0.2417	0.03021	0.1843	3	19	HK1,MAT1A,PCBD1
Cytoband	4q23	4q23		0.001501	0.3753	0.04171	0.2544	3	22	ADH1A,ADH1C,ADH6
Transcription Factor Binding Site	V$HNF1_01	V$HNF1_01		5.115e-26	2.281e-23	2.276e-23	1.52e-22	38	196	HAO1,FOXA2,HNF4A,SERPINA4,AFM,FGA,ALB,FGFR4,PLG,UGT1A6,ANXA13,APCS,SLCO1B1,SEMA4G,UGT1A4,UGT1A1,IGFBP1,NR5A2,G6PC,CYP2E1,GC,SLC26A1,APOM,NR1H4,SERPINA7,CA5A,PAQR9,HNF1A,HNF1B,SERPINA6,LECT2,SGK2,SLC7A9,LIPC,GUCA2B,TM4SF4,HABP2,SERPINA10
Transcription Factor Binding Site	V$HNF1_Q6	V$HNF1_Q6		1.021e-25	4.552e-23	2.276e-23	1.52e-22	39	213	HAO1,F2,HNF4A,F13B,PRODH2,SERPINA4,AFM,FGA,FGB,ALB,FGFR4,PLG,UGT1A6,ANXA13,SLCO1B1,SEMA4G,UGT1A1,IGFBP1,G6PC,SPINK1,CYP2E1,GC,APOM,GJB1,ANGPTL3,C8A,SLC39A5,NR1H4,SERPINA7,HNF1A,HNF1B,SERPINA6,SGK2,SLC7A9,LIPC,GUCA2B,TM4SF4,HABP2,SERPINA10
Transcription Factor Binding Site	RGTTAMWNATT_V$HNF1_01	RGTTAMWNATT_V$HNF1_01		3.867e-19	1.725e-16	5.749e-17	3.84e-16	20	60	SLC17A2,TTR,F13B,AGT,FGFR4,PLG,UGT1A6,ANXA13,IGFBP1,NR5A2,G6PC,GC,APOM,SLC23A1,HNF1A,HNF1B,SLC17A4,SGK2,LIPC,HABP2
Transcription Factor Binding Site	V$HNF1_C	V$HNF1_C		7.298e-19	3.255e-16	8.138e-17	5.435e-16	31	192	SLC17A2,FOXA2,F2,SERPINA4,AFM,PKLR,FGA,FGB,FGFR4,ANXA13,APCS,CPN1,SEMA4G,SLC25A12,G6PC,SLC37A4,PROC,SPINK1,GC,APOM,GJB1,C8A,SERPINA7,HNF1A,HNF1B,RBP4,SGK2,SLC7A9,GUCA2B,HABP2,SERPINA10
Transcription Factor Binding Site	V$HNF4_Q6	V$HNF4_Q6		9.226e-08	4.115e-05	8.229e-06	5.496e-05	19	206	PDZK1,PIPOX,TM6SF2,PKLR,HFE2,AGXT2,NR5A2,GIPC2,GATA4,CLDN15,SLC22A7,PLA2G12B,C8A,C9,HNF1A,TRIM15,TREH,AGMAT,SERPIND1
Transcription Factor Binding Site	V$COUP_01	V$COUP_01		2.985e-06	0.001332	0.0002163	0.001445	17	211	FOXA3,PKLR,PON1,ASGR2,SERPINC1,G6PC,GATA4,APOM,PLA2G12B,CREB3L3,HNF1A,HNF1B,LGALS4,SLC7A9,GYS2,SERPIND1,TP53BP1
Transcription Factor Binding Site	V$HNF4_01	V$HNF4_01		3.395e-06	0.001514	0.0002163	0.001445	17	213	PDZK1,F2,F10,F13B,PKLR,IGF1R,G6PC,GIPC2,INHBC,GATA4,CDHR5,APOM,HNF1A,HNF1B,LGALS4,SLC7A9,PCK1
Transcription Factor Binding Site	V$HNF4ALPHA_Q6	V$HNF4ALPHA_Q6		2.4e-05	0.0107	0.001338	0.008937	16	222	PDZK1,PIPOX,TTR,F12,ABCC6,G6PC,INHBC,GATA4,PLA2G12B,SLC39A5,HNF1A,HNF1B,TREH,GYS2,PCK1,TP53BP1
Transcription Factor Binding Site	V$HNF4_01_B	V$HNF4_01_B		3.436e-05	0.01532	0.001703	0.01137	15	204	PDZK1,PIPOX,F10,PRODH2,PON1,IGF1R,SERPINC1,INHBC,GATA4,SLC39A5,HNF1A,HNF1B,LGALS4,OTC,TP53BP1
Transcription Factor Binding Site	V$HNF4_DR1_Q3	V$HNF4_DR1_Q3		4.809e-05	0.02145	0.002145	0.01432	15	210	PDZK1,PIPOX,FOXA3,TTR,F10,F12,FABP1,PRODH2,PKLR,CCL15,MASP2,GATA4,SLC39A5,OTC,TREH
Gene Family	363	UDP glucuronosyltransferases	genenames.org	3.769e-15	4.447e-13	4.447e-13	2.38e-12	12	32	UGT2B4,UGT2B7,UGT2B10,UGT2B15,UGT1A6,UGT1A5,UGT1A9,UGT1A4,UGT1A1,UGT1A3,UGT3A1,UGT2A3
Gene Family	405	Apolipoproteins	genenames.org	4.107e-14	4.847e-12	2.423e-12	1.297e-11	10	21	APOA1,APOA2,APOA4,APOB,APOC2,APOC3,APOC4,APOH,APOM,APOA5
Gene Family	1179	Apolipoproteins|Sushi domain containing	genenames.org	8.826e-12	1.041e-09	3.471e-10	1.858e-09	12	57	CFHR1,CFHR2,F13B,HPR,APOH,MASP2,CFHR5,CFHR4,CFHR3,C4BPA,C4BPB,C6
Gene Family	752	Solute carriers	genenames.org	1.681e-11	1.983e-09	4.958e-10	2.653e-09	26	395	SLC17A2,SLC30A10,SLC5A9,SLCO1B1,SLC2A2,SLC10A1,SLC25A12,SLC17A1,SLC22A1,SLC37A4,SLC16A13,SLC22A25,SLC26A1,SLC22A7,SLC22A10,SLC23A1,SLC39A5,SLC27A5,SLC35D2,SLC38A4,SLC17A4,SLC7A9,SLC22A9,SLC25A36,SLC10A5,SLC25A13
Gene Family	492	Complement system|Sushi domain containing	genenames.org	2.489e-11	2.937e-09	5.874e-10	3.144e-09	10	36	CFHR1,CFHR2,CFHR5,CFHR4,CFHR3,C6,C8A,C8B,C8G,C9
Gene Family	1250	Gla domain containing	genenames.org	1.022e-10	1.206e-08	2.009e-09	1.075e-08	7	13	F2,TTR,F9,F10,PROC,ITIH2,PROZ
Gene Family	739	Serpin peptidase inhibitors	genenames.org	9.389e-10	1.108e-07	1.583e-08	8.471e-08	9	37	SERPINA1,SERPINA4,AGT,SERPINF2,SERPINC1,SERPINA7,SERPINA6,SERPINA10,SERPIND1
Gene Family	631	Lipocalins	genenames.org	1.163e-07	1.373e-05	1.716e-06	9.183e-06	6	19	AMBP,APOM,C8G,RBP4,ORM1,ORM2
Gene Family	1001	Cytochrome P450 family 2	genenames.org	3.126e-07	3.688e-05	4.098e-06	2.193e-05	7	35	CYP2B6,CYP2C19,CYP2C8,CYP2C9,CYP2C18,CYP2D6,CYP2E1
Gene Family	1002	Cytochrome P450 family 3	genenames.org	1.983e-06	0.000234	2.127e-05	0.0001139	4	8	CYP3A43,CYP3A7,CYP3A4,CYP3A5
Coexpression	M13283	Liver selective genes	MSigDB C2: CGP Curated Gene Sets (v6.0)	8.86e-154	6.64e-150	6.64e-150	6.307e-149	119	244	CFHR2,HGD,NAT2,AADAC,MBL2,AKR1C4,HMGCS2,TST,F2,F5,TTR,F9,F10,F11,F12,F13B,FABP1,ABCB4,ADH4,ADH6,SERPINA1,SAA4,HPD,AFM,AGT,AGXT,HPX,FGA,UGT2B4,FGB,UGT2B7,AHSG,UGT2B15,HRG,ACAA2,ALAS1,ALB,FGFR4,FGG,FGL1,ABCC2,PLG,PLGLB2,SERPINF2,ALDOB,NR0B2,VTN,FMO5,ANG,APCS,APOA1,APOA2,CPB2,CYP4F2,APOB,APOC2,APOC3,APOC4,CPN2,APOH,ABCC6,SLC2A2,CRP,ARG1,SEPHS2,SLC10A1,IGFBP1,ASGR1,ASGR2,ASL,MTTP,SERPINC1,G6PC,PROC,C…
Coexpression	18318837-TableS1	Human MesenchymalStemCells_Yamamoto08_1252genes	GeneSigDB	3.543e-149	2.655e-145	1.327e-145	1.261e-144	171	853	CFHR1,SLC17A2,CFHR2,HGD,AADAC,IL32,MAT1A,PDZK1,MBL2,ALDH8A1,TMEM176A,UNC93A,HMGCS2,HAO1,FOXA2,F2,ONECUT1,F5,LEAP2,TTR,F9,F10,F11,F12,F13B,FABP1,ABCB4,ADH1A,ADH1C,ADH4,PRODH2,SERPINA1,SAA4,SERPINA4,HPD,AFM,AGT,AGXT,HPX,FGA,UGT2B4,FGB,UGT2B7,AHSG,UGT2B10,UGT2B15,HRG,ALB,FGG,FGL1,ABCC2,PLG,HSD17B2,PLGLB2,ALDOB,NR0B2,HFE2,AMBP,VIL1,ONECUT2,A1CF,TMEM176B,UGT1A6,ANXA13,PON1,APCS,SLC5A9,APOA1,APOA2,CPB2…
Coexpression	M16932	Top 200 marker genes down-regulated in the 'proliferation' subclass of hepatocellular carcinoma (HCC); characterized by increased proliferation, high levels of serum AFP [GeneID=174], and chromosomal instability.	MSigDB C2: CGP Curated Gene Sets (v6.0)	1.893e-78	1.419e-74	4.729e-75	4.492e-74	69	179	CLDN14,NAT2,AADAC,MAT1A,PIPOX,HAO1,TST,HNF4A,TTPA,F12,ABCB4,ADH1A,ADH4,ADH6,HPD,AFM,AGXT,ALAS1,CCL16,PLG,HFE2,CYP3A43,CPB2,CYP4F2,SLC2A2,AGXT2,C3P1,SLC10A1,SLC22A1,AKR7A3,MTTP,ABCB11,SERPINC1,MASP2,CYP2B6,CYP2C8,CYP2C9,CYP4A11,CYP8B1,BAAT,DAO,ITIH1,CES2,BHMT,RTP3,NR1I2,SULT2A1,ANGPTL3,PRAP1,C6,C8A,ABCG8,NR1I3,KNG1,CA5A,APOA5,SLC38A4,GPT,AMDHD1,LECT2,CYP4A22,TFR2,OTC,EHHADH,GYS2,HAAO,CYP4F3,SERPIN…
Coexpression	M6175	Genes down-regulated at early fetal liver stage (embryonic days E11.5 - E12.5) compared to the late fetal liver stage (embryonic days E14.5 - E16.5).	MSigDB C2: CGP Curated Gene Sets (v6.0)	9.266e-59	6.944e-55	1.736e-55	1.649e-54	61	222	PIPOX,HMGCS2,TST,F2,TTPA,F10,F11,F12,PHYH,SAA4,AFM,AGT,FGA,FGB,AHSG,ACAA2,FGG,PLG,HSD17B2,SERPINF2,AMBP,VTN,CPB2,APOB,ABCC6,SEMA4G,CRP,ARG1,MST1,IGFBP1,ASGR2,SERPINC1,SLC37A4,PROC,PECR,SPP2,GC,ITIH1,ITIH2,ITIH3,ITIH4,BHMT,GJB1,ANGPTL3,PCYT2,C8A,C8G,C9,KLKB1,KNG1,SLC27A5,CA5A,DPYS,LBP,TFR2,LIPC,CES3,HAAO,SERPINA10,SERPIND1,PCK2
Coexpression	M6145	Genes highly expressed in hepatocellular carcinoma with good survival.	MSigDB C2: CGP Curated Gene Sets (v6.0)	4.33e-58	3.245e-54	6.49e-55	6.165e-54	57	185	HGD,ACADS,PIPOX,HAO1,TTPA,LEAP2,F10,F12,F13B,HPD,PKLR,UGT2B4,UGT2B15,ALAS1,CCL16,ABCC2,TMEM176B,HYAL1,UGT1A6,APCS,CPB2,APOC3,CPN2,SLC2A2,MST1,ASGR1,SERPINC1,G6PC,MASP2,CYP2D6,CYP3A4,BAAT,UGT3A1,CDHR5,CFHR5,ITIH1,CES2,GJB1,SULT2A1,PCYT2,KHK,C4BPB,ABCG5,ABCG8,KNG1,SLC27A5,DPYS,APOA5,AMDHD1,ECHS1,MLXIPL,OTC,EHHADH,PAH,CES3,SERPIND1,PCK1
Coexpression	M2194	Genes down-regulated in liver samples of liver-specific knockout of HNF4A [GeneID=3172].	MSigDB C2: CGP Curated Gene Sets (v6.0)	7.19e-58	5.388e-54	8.98e-55	8.53e-54	53	149	CFHR1,AADAC,PDZK1,MBL2,ALDH8A1,HAO1,F11,F12,F13B,ADH4,PRODH2,SERPINA1,SAA4,SERPINA4,UGT2B4,HRG,HSD17B2,SLC30A10,APOA4,APOC2,CPN2,ABCC6,ASGR1,MTTP,CYP2C19,SPP2,CYP8B1,BAAT,DDC,SLC22A7,APOM,PROZ,PLA2G12B,PCYT2,C4BPA,XYLB,C6,C8A,C8B,C8G,C9,SLC23A1,NR1I3,SLC27A5,CA5A,CLDN2,TFR2,SLC22A9,OTC,LIPC,UGT2A3,AGMAT,HAAO
Coexpression	M1286	Genes from 'subtype S3' signature of hepatocellular carcinoma (HCC): hepatocyte differentiation.	MSigDB C2: CGP Curated Gene Sets (v6.0)	3.131e-56	2.347e-52	3.352e-53	3.185e-52	63	266	HGD,IL32,ACADS,HMGCS2,ACY1,TST,F2,F5,F11,ABCB4,ADH4,ADH6,HPD,AGXT,PKLR,FGB,HRG,ACAA2,ALAS1,FGG,PLG,PLGLB2,ALDOB,APCS,APOA1,CPB2,APOC2,APOC4,APOH,ABCC6,SLC2A2,ARG1,CRYAA,SLC10A1,ASGR1,ASGR2,ASL,SERPINC1,CYP3A7,CYP2C9,BAAT,DAO,GCKR,ITIH1,ITIH3,ITIH4,BHMT,GJB1,SULT2A1,C4BPA,C8B,KLKB1,SLC23A1,KNG1,GPT,SERPINA6,ECHS1,GSTA2,EHHADH,PAH,HAAO,PCK1,PCK2
Coexpression	18318837-Table1	Human MesenchymalStemCells_Yamamoto08_83genes	GeneSigDB	1.647e-51	1.235e-47	1.543e-48	1.466e-47	40	79	CFHR1,CFHR2,F2,F5,F9,F10,F11,F12,F13B,FABP1,ABCB4,FGA,FGB,FGG,FGL1,ABCC2,APOA1,APOA2,APOB,APOC2,APOH,ABCB11,CYP4F12,CYP3A7,CYP2C8,CYP3A4,CYP8B1,CFHR5,CFHR4,CFHR3,PLA2G12B,C4BPA,C4BPB,C6,C8A,C8B,C9,ABCG5,LIPC,CYP4F3
Coexpression	M7054	Genes up-regulated specifically in human liver tissue.	MSigDB C2: CGP Curated Gene Sets (v6.0)	3.739e-50	2.802e-46	3.114e-47	2.958e-46	35	55	CFHR2,MBL2,AKR1C4,HAO1,F9,F12,SAA4,AFM,UGT2B4,CCL16,APCS,APOB,CPN1,CPN2,CRP,ARG1,SLC22A1,SERPINC1,MASP2,CYP3A7,SPP2,GCKR,ITIH2,CFHR4,C4BPB,C8A,C9,GPT,LECT2,TFR2,LIPC,LPA,SLC25A13,HABP2,SERPIND1
Coexpression	M13449	Genes down-regulated in hepatoblastoma samples compared to normal liver tissue.	MSigDB C2: CGP Curated Gene Sets (v6.0)	2.177e-49	1.632e-45	1.632e-46	1.55e-45	58	267	HGD,NAT2,ACADS,MAT1A,F9,F11,ADH1C,SAA4,AGXT,HPX,HRG,ACAA2,ALAS1,ALDOB,ANG,SHBG,PON1,CRP,GBA3,SLC10A1,ASL,SLC22A1,ABCB11,SLC37A4,ZG16,MASP2,CYP2B6,CYP2C19,CYP2C8,CYP2C18,CYP2D6,CYP3A5,AKR1D1,DAO,SLC22A7,ITIH4,CFHR4,NR1I2,VNN1,PXMP2,C6,C8A,C8B,C8G,C9,NR1I3,GOT1,SLC27A5,SLC38A4,TFR2,LPA,GYS2,ANXA10,HAAO,HABP2,HAO2,PCK1,PCK2
Coexpression Atlas	BM Top 100 - liver	BM Top 100 - liver	Body Map	5.921e-97	2.075e-93	2.075e-93	1.813e-92	62	80	CFHR1,CFHR2,MBL2,ALDH8A1,HMGCS2,LEAP2,TTR,F9,FABP1,ADH1A,ADH1C,ADH4,SERPINA1,HPD,AFM,HPR,AGXT,HPX,FGA,UGT2B4,FGB,AHSG,HRG,ALB,PLG,ALDOB,AMBP,VTN,PON1,APCS,APOA1,CPB2,APOH,SLC2A2,ARG1,UGT1A3,SLC22A1,MTTP,SERPINC1,G6PC,CYP2C8,CYP2E1,CYP3A4,CYP3A5,CYP4A11,AKR1D1,SLC22A7,ITIH3,CFHR4,SULT2A1,C9,KNG1,DPYS,RBP4,GSTA1,TFR2,ORM1,PAH,CYP4F3,ACSM2A,SERPIND1,PCK1
Coexpression Atlas	gudmap_developingLowerUrinaryTract_e15.5_ureteral tissue_1000_k4	DevelopingLowerUrinaryTract_e15.5_ureteral tissue_emap-8234_k-means-cluster#4_top-relative-expression-ranked_1000	Gudmap Mouse MOE430.2	1.824e-84	6.39e-81	3.195e-81	2.792e-80	93	379	HGD,AADAC,MAT1A,GLYCTK,ALDH8A1,PIPOX,HAO1,F2,FOXA3,HNF4A,F5,TTPA,TTR,F10,F11,F12,F13B,FABP1,ABCB4,SERPINA1,HPD,AFM,HPX,PKLR,FGA,FGB,AHSG,UGT2B15,ALB,FGFR4,FGG,PLG,SERPINF2,ALDOB,SLC30A10,HFE2,AMBP,ONECUT2,VTN,PON1,APOA1,APOA2,CPB2,APOB,APOC2,CPN1,CPN2,APOH,SLC2A2,CRP,C2orf72,AGXT2,IGFBP1,NR5A2,MTTP,SERPINC1,PROC,GALM,SPP2,CDHR2,GC,UROC1,FTCD,ITIH2,ITIH3,ITIH4,APOM,PLA2G12B,ANGPTL3,C8A,C8B,C8G,KLK…
Coexpression Atlas	gudmap_developingKidney_e15.5_early proxim tubul_1000	DevelopingKidney_e15.5_early proxim tubul_emap-28005_top-relative-expression-ranked_1000	Gudmap Mouse MOE430.2	5.508e-80	1.93e-76	6.433e-77	5.622e-76	116	785	SLC17A2,HGD,AADAC,TMED6,PDZK1,GLYCTK,ALDH8A1,PIPOX,TMEM176A,ACY1,FOXA2,F2,HNF4A,TTR,F10,F13B,PRODH2,SERPINA1,AFM,FGA,FGB,UGT2B10,UGT2B15,ALB,FGFR4,FGG,ABCC2,HSD17B2,SERPINF2,ALDOB,AMBP,VIL1,TMEM176B,ANXA13,APCS,SLC5A9,APOA1,APOA2,APOA4,CPB2,APOB,APOC2,APOC3,CPN1,MUC13,APOH,SLC2A2,C2orf72,AGXT2,IGFBP1,SLC17A1,UNC5CL,SLC22A1,MTTP,SLC37A4,TMEM82,PROC,PECR,CHCHD10,SLC16A13,SLC22A25,GIPC2,CYP2D6,SPINK…
Coexpression Atlas	gudmap_developingLowerUrinaryTract_e15.5_ureteral tissue_500_k2	DevelopingLowerUrinaryTract_e15.5_ureteral tissue_emap-8234_k-means-cluster#2_top-relative-expression-ranked_500	Gudmap Mouse MOE430.2	5.555e-77	1.946e-73	4.866e-74	4.253e-73	76	246	HGD,AADAC,ALDH8A1,HAO1,F2,FOXA3,HNF4A,F5,TTPA,TTR,F10,F13B,FABP1,ABCB4,SERPINA1,HPD,AFM,HPX,PKLR,FGA,FGB,AHSG,UGT2B15,ALB,FGG,PLG,SERPINF2,ALDOB,SLC30A10,HFE2,AMBP,ONECUT2,VTN,PON1,APOA1,APOA2,CPB2,APOB,APOC2,CPN1,CPN2,APOH,SLC2A2,CRP,C2orf72,AGXT2,IGFBP1,NR5A2,SERPINC1,PROC,SPP2,GC,UROC1,FTCD,ITIH2,ITIH3,ITIH4,APOM,PLA2G12B,ANGPTL3,C8A,KNG1,PAQR9,DPYS,RBP4,SERPINA6,TRIM10,TFR2,SGK2,OTC,GYS2,PAH,…
Coexpression Atlas	gudmap_developingKidney_e15.5_early proxim tubul_500	DevelopingKidney_e15.5_early proxim tubul_emap-28005_top-relative-expression-ranked_500	Gudmap Mouse MOE430.2	1.527e-74	5.351e-71	1.07e-71	9.352e-71	87	393	HGD,AADAC,TMED6,PDZK1,GLYCTK,ALDH8A1,PIPOX,ACY1,F2,HNF4A,TTR,F10,F13B,PRODH2,SERPINA1,AFM,FGA,FGB,UGT2B10,UGT2B15,FGFR4,FGG,ABCC2,HSD17B2,SERPINF2,ALDOB,AMBP,VIL1,ANXA13,SLC5A9,APOA1,APOA2,APOA4,CPB2,APOB,APOC2,CPN1,SLC2A2,AGXT2,IGFBP1,SLC17A1,UNC5CL,SLC22A1,SLC37A4,TMEM82,PROC,SLC22A25,GIPC2,SPINK1,SPP2,CDHR2,CYP4A11,ACY3,DAO,GC,PBLD,ANKS4B,ITIH3,APOM,PLA2G12B,CLRN3,VNN1,XYLB,C8G,SLC23A1,SLC39A5…
Coexpression Atlas	gudmap_developingLowerUrinaryTract_e15.5_ureteral tissue_500	DevelopingLowerUrinaryTract_e15.5_ureteral tissue_emap-8234_top-relative-expression-ranked_500	Gudmap Mouse MOE430.2	1.489e-70	5.218e-67	8.697e-68	7.6e-67	85	406	HGD,AADAC,ALDH8A1,HMGCS2,HAO1,F2,FOXA3,HNF4A,F5,TTPA,TTR,F10,F13B,FABP1,ABCB4,SERPINA1,HPD,AFM,HPX,PKLR,FGA,FGB,AHSG,UGT2B10,UGT2B15,ALB,FGG,PLG,HSD17B2,SERPINF2,ALDOB,SLC30A10,HFE2,AMBP,ONECUT2,VTN,FMO5,PON1,APOA1,APOA2,CPB2,APOB,APOC2,CPN1,CPN2,APOH,SLC2A2,CRP,C2orf72,MST1,AGXT2,IGFBP1,NR5A2,SERPINC1,PROC,SPP2,CYP3A5,GC,UROC1,FTCD,DDC,ITIH2,ITIH3,ITIH4,APOM,PLA2G12B,ANGPTL3,C8A,KNG1,PAQR9,DPYS,…
Coexpression Atlas	PCBC_ratio_MESO-15 blastocyst_vs_MESO-15 amniotic fluid MSC_cfr-2X-p05	MESO-15 blastocyst_vs_MESO-15 amniotic fluid MSC-Confounder_removed-fold2.0_adjp0.05	PCBC_AltAnalyze	8.584e-70	3.008e-66	4.297e-67	3.755e-66	106	761	HGD,HDHD3,ACADS,MAT1A,PDZK1,GLYCTK,TMEM176A,UNC93A,HMGCS2,ACY1,TM6SF2,FOXA2,HNF4A,LEAP2,FABP1,CHST13,PRODH2,SERPINA1,MIA2,HPD,AGT,HPX,FGA,FGB,UGT2B7,AHSG,ACAA2,ALB,FGFR4,FGG,ABCC2,PLG,HSD17B2,PLGLB2,GLTPD2,VIL1,A1CF,VTN,FMO5,ANG,HYAL1,SLC5A9,APOA1,APOA2,APOA4,APOB,APOH,ABCC6,SEMA4G,C2orf72,ARG1,MST1,AGXT2,OIT3,SLC10A1,ARSE,ASGR1,ASL,MTTP,IHH,MOGAT3,ZG16,PECR,SLC16A13,GALM,SPINK1,UGT3A1,AKR1D1,GAT…
Coexpression Atlas	gudmap_developingLowerUrinaryTract_e15.5_ureteral tissue_1000	DevelopingLowerUrinaryTract_e15.5_ureteral tissue_emap-8234_top-relative-expression-ranked_1000	Gudmap Mouse MOE430.2	3.544e-67	1.242e-63	1.552e-64	1.357e-63	106	806	HGD,AADAC,MAT1A,GLYCTK,ALDH8A1,PIPOX,HMGCS2,HAO1,F2,FOXA3,HNF4A,F5,TTPA,TTR,F10,F11,F12,F13B,FABP1,ABCB4,SERPINA1,HPD,AFM,HPX,PKLR,FGA,FGB,AHSG,UGT2B10,UGT2B15,ALB,FGFR4,FGG,PLG,HSD17B2,SERPINF2,ALDOB,SLC30A10,HFE2,AMBP,ONECUT2,VTN,FMO5,PON1,APOA1,APOA2,CPB2,APOB,APOC2,CPN1,CPN2,APOH,SLC2A2,CRP,C2orf72,ARG1,MST1,AGXT2,IGFBP1,NR5A2,MTTP,SERPINC1,PROC,GALM,SPINK1,GBP7,SPP2,CDHR2,CYP3A5,GC,UROC1,FTC…
Coexpression Atlas	ratio_EB-blastocyst_vs_EB-cbCD34_500_K1	ratio_EmbryoidBody-blastocyst_vs_EmbryoidBody-derived-from_CD34-iPSC_top-relative-expression-ranked_500_k-means-cluster#1	PCBC	3.751e-59	1.314e-55	1.46e-56	1.276e-55	59	193	PDZK1,UNC93A,FOXA2,F2,HNF4A,FABP1,SERPINA1,AGXT,FGA,FGB,AHSG,HRG,ALB,FGG,FGL1,PLG,SERPINF2,AMBP,VIL1,A1CF,VTN,APCS,APOA1,APOA2,APOA4,APOB,APOC1P1,APOC2,APOC3,CPN1,APOH,ARG1,ASGR2,MTTP,SERPINC1,IHH,SPINK1,SPP2,AKR1D1,GC,ITIH1,ITIH2,APOM,GJB1,PLA2G12B,SULT2A1,EPS8L3,CREB3L3,SLC39A5,KNG1,DPYS,AMN,RBP4,SERPINA6,GSTA1,GSTA2,ORM1,ORM2,TM4SF4
Coexpression Atlas	gudmap_kidney_adult_RenalCortexMixed_Std_500	kidney_adult_RenalCortexMixed_Std_top-relative-expression-ranked_500	Gudmap Mouse MOE430.2	1.316e-58	4.612e-55	4.612e-56	4.03e-55	77	425	HGD,AADAC,PDZK1,ALDH8A1,PIPOX,TMEM176A,PANK1,TTR,F13B,ADH1C,PHYH,SERPINA1,AFM,UGT2B10,UGT2B15,FGG,FGL1,ABCC2,HSD17B2,ALDOB,VIL1,A1CF,FMO5,APOA2,APOC3,CPN1,ACOT12,AGXT2,SEPHS2,CLYBL,SLC17A1,SLC22A1,G6PC,PECR,UPB1,GIPC2,SPINK1,CYP2E1,SPP2,CYP4A11,ACY3,UGT3A1,DAO,GC,CDHR5,ANKS4B,DDC,SLC22A7,APOM,CLRN3,VNN1,SLC22A10,PXMP2,KHK,XYLB,SLC23A1,KNG1,NR1H4,HNF1B,METTL7B,NAT8,CLDN2,CYP4A22,GSTA1,SLC7A9,GUCA2…
Computational	M14108 GNF2_HPX	Neighborhood of HPX	MSigDb: C4 - CGN: Cancer Gene Neighborhood (v6.0)	6.668e-113	2.914e-110	2.914e-110	1.94e-109	89	135	MAT1A,PIPOX,TMEM176A,HMGCS2,TST,F2,F10,F12,ADH1C,ADH6,SAA4,SERPINA4,HPD,HPR,AGT,AGXT,HPX,AHSG,HRG,ALB,PLG,SERPINF2,ALDOB,AMBP,VTN,ANG,TMEM176B,PON1,APCS,APOA1,APOA2,CPB2,CYP4F2,APOC2,APOC3,APOC4,CPN2,APOH,ABCC6,SLC10A1,ASGR1,ASGR2,ASL,SLC22A1,AKR7A3,SERPINC1,CYP4F12,G6PC,PROC,ZG16,MASP2,CYP2B6,UPB1,CYP2C8,CYP2C9,CYP2D6,CYP2E1,SPP2,CYP4A11,AKR1D1,CDHR5,FTCD,SLC22A7,ITIH1,ITIH3,ITIH4,CES2,CFHR4,GJB…
Computational	M10917 GNF2_HPN	Neighborhood of HPN	MSigDb: C4 - CGN: Cancer Gene Neighborhood (v6.0)	8.408e-102	3.674e-99	1.837e-99	1.223e-98	83	133	MAT1A,PIPOX,TMEM176A,HMGCS2,TST,F2,F10,F12,ADH1C,ADH6,PRODH2,SAA4,SERPINA4,HPD,HPR,AGXT,HPX,AHSG,HRG,PLG,SERPINF2,ALDOB,AMBP,VTN,ANG,TMEM176B,PON1,APCS,APOA1,APOA2,CYP4F2,APOC2,APOC3,APOC4,CPN2,APOH,ABCC6,SLC10A1,ASGR2,ASL,SLC22A1,AKR7A3,SERPINC1,CYP4F12,PROC,ZG16,MASP2,CYP2B6,UPB1,CYP2C8,CYP2C9,CYP2D6,CYP2E1,SPP2,CYP4A11,CDHR5,FTCD,SLC22A7,ITIH1,ITIH3,ITIH4,CES2,GJB1,PXMP2,C4BPA,KHK,C4BPB,C6,C8A…
Computational	M132 GNF2_LCAT	Neighborhood of LCAT	MSigDb: C4 - CGN: Cancer Gene Neighborhood (v6.0)	8.681e-96	3.794e-93	1.265e-93	8.42e-93	78	124	MAT1A,PIPOX,TMEM176A,HMGCS2,TST,F2,F10,F12,ADH1C,ADH6,SAA4,SERPINA4,HPD,HPR,AGXT,HPX,PKLR,AHSG,HRG,SERPINF2,AMBP,VTN,ANG,TMEM176B,PON1,APCS,APOA1,APOA2,CYP4F2,APOC2,APOC3,APOC4,CPN2,ABCC6,SLC10A1,ASGR2,ASL,SLC22A1,AKR7A3,SERPINC1,CYP4F12,PROC,ZG16,MASP2,CYP2B6,UPB1,CYP2C8,CYP2C9,CYP2D6,CYP2E1,SPP2,CYP4A11,CDHR5,FTCD,SLC22A7,ITIH1,ITIH3,ITIH4,CES2,GJB1,PXMP2,C4BPA,KHK,C4BPB,C6,C8A,C8G,SLC27A5,RBP4…
Computational	M10693 GNF2_GSTM1	Neighborhood of GSTM1	MSigDb: C4 - CGN: Cancer Gene Neighborhood (v6.0)	7.111e-79	3.107e-76	7.768e-77	5.172e-76	66	109	MAT1A,PIPOX,TMEM176A,HMGCS2,TST,F2,F10,F12,ADH1C,SAA4,SERPINA4,HPD,AGXT,HPX,HRG,SERPINF2,AMBP,VTN,ANG,TMEM176B,PON1,APCS,APOA1,CYP4F2,APOC2,APOC3,APOC4,CPN2,ABCC6,SLC10A1,ASGR2,ASL,SLC22A1,AKR7A3,SERPINC1,CYP4F12,G6PC,PROC,MASP2,UPB1,CYP2C8,CYP2C9,CYP2D6,CYP2E1,CYP4A11,CDHR5,FTCD,SLC22A7,ITIH1,ITIH3,ITIH4,CES2,GJB1,PXMP2,KHK,C6,C8A,C8G,SLC27A5,RBP4,ECHS1,ORM1,ORM2,HAAO,SERPIND1,PCK1
Computational	M1872 MODULE_23	Liver genes - metabolism and xenobiotics.	MSigDb: C4 - CM: Cancer Modules (v6.0)	2.415e-77	1.055e-74	2.11e-75	1.405e-74	116	564	CFHR1,HGD,AADAC,IL32,MAT1A,HMGCS2,F2,F10,F12,FABP1,ADH1A,ADH1C,PHYH,SERPINA1,SERPINA4,HPD,HPR,AGT,AGXT,FGA,UGT2B4,FGB,UGT2B7,AHSG,UGT2B15,HRG,ALAS1,ALB,CCL15,FGFR4,FGL1,PLG,SERPINF2,ALDOB,NR0B2,AMBP,VTN,FMO5,HYAL1,SHBG,APCS,APOA1,CPB2,APOB,APOC2,APOC3,CPN1,APOC4,CPN2,APOH,ABCC6,ARG1,MST1,SLC10A1,IGFBP1,ASGR1,ASGR2,SLC22A1,AKR7A3,SERPINC1,CYP4F12,IHH,SLC37A4,PROC,CYP2B6,CYP2C19,CYP2C8,CYP2C9,CYP2D…
Computational	M6913 CAR_HPX	Neighborhood of HPX	MSigDb: C4 - CGN: Cancer Gene Neighborhood (v6.0)	4.358e-76	1.904e-73	3.174e-74	2.113e-73	56	73	CFHR2,AADAC,MBL2,F2,F9,F12,ADH6,SAA4,HPD,AFM,AGT,HPX,FGA,FGB,HRG,FGG,FGL1,PLG,SERPINF2,ALDOB,AMBP,ANG,APCS,APOA1,CPB2,APOB,ARG1,IGFBP1,ASGR2,SLC22A1,SERPINC1,G6PC,CYP3A7,CYP2C8,CYP2C9,CYP2E1,AKR1D1,GC,ITIH1,ITIH3,CFHR4,SULT2A1,C4BPA,C4BPB,C6,C8A,C8B,C9,DPYS,RBP4,LECT2,TFR2,ORM1,LPA,PAH,SERPIND1
Computational	M17919 GNF2_TST	Neighborhood of TST	MSigDb: C4 - CGN: Cancer Gene Neighborhood (v6.0)	3.354e-75	1.466e-72	2.094e-73	1.394e-72	63	104	MAT1A,TMEM176A,HMGCS2,TST,F2,F10,F12,ADH1C,SAA4,SERPINA4,HPD,AGXT,HPX,PKLR,AHSG,HRG,SERPINF2,ALDOB,AMBP,VTN,ANG,TMEM176B,PON1,APCS,APOA1,CYP4F2,APOC2,APOC3,APOC4,ABCC6,ASGR2,ASL,SLC22A1,AKR7A3,SERPINC1,PROC,CYP2B6,UPB1,CYP2C8,CYP2C9,CYP2D6,CYP2E1,CYP4A11,CDHR5,FTCD,SLC22A7,ITIH1,ITIH3,ITIH4,CES2,PXMP2,KHK,C8G,SLC27A5,RBP4,ECHS1,TFR2,ORM1,ORM2,HABP2,SERPIND1,PCK1,PCK2
Computational	M5702 MODULE_24	Fetal liver genes - metabolism and xenobiotics.	MSigDb: C4 - CM: Cancer Modules (v6.0)	3.103e-60	1.356e-57	1.695e-58	1.129e-57	93	453	CFHR1,HGD,AADAC,IL32,HMGCS2,F2,F10,F12,FABP1,ADH1A,PHYH,SERPINA1,SERPINA4,HPD,HPR,AGT,AGXT,FGA,FGB,AHSG,UGT2B15,HRG,ALAS1,ALB,CCL15,FGFR4,FGL1,PLG,SERPINF2,ALDOB,NR0B2,AMBP,VTN,HYAL1,APCS,APOA1,APOA4,CPB2,APOB,APOC2,APOC3,APOC4,APOH,ABCC6,ARG1,MST1,IGFBP1,ASGR1,ASGR2,SERPINC1,IHH,SLC37A4,PROC,CYP3A7,CYP2B6,CYP2E1,SPP2,CYP3A4,INHBC,CYP4A11,BAAT,GC,DDC,ITIH1,ITIH2,ITIH3,ITIH4,BHMT,APOM,GJB1,C4BPA,C…
Computational	M18034 CAR_IGFBP1	Neighborhood of IGFBP1	MSigDb: C4 - CGN: Cancer Gene Neighborhood (v6.0)	7.954e-60	3.476e-57	3.862e-58	2.571e-57	44	57	MBL2,F2,F9,F12,ADH1A,ADH1C,ADH6,SAA4,HPD,AFM,HPX,AHSG,PLG,SERPINF2,APCS,APOA1,CPB2,APOB,ARG1,IGFBP1,ASGR2,SLC22A1,G6PC,CYP3A7,CYP2C8,CYP2C9,CYP3A4,CYP4A11,AKR1D1,GC,ITIH1,CFHR4,APOM,SULT2A1,C4BPA,C6,C8A,C9,DPYS,LECT2,TFR2,LPA,PAH,PCK1
Computational	M17558 MODULE_55	Genes in the cancer module 55.	MSigDb: C4 - CM: Cancer Modules (v6.0)	1.254e-56	5.481e-54	5.481e-55	3.65e-54	115	833	CFHR1,HGD,AADAC,IL32,MAT1A,HMGCS2,F2,F10,F12,FABP1,ADH1A,ADH1C,PHYH,SERPINA1,SERPINA4,HPD,HPR,AGT,AGXT,FGA,UGT2B4,FGB,UGT2B7,AHSG,UGT2B15,HRG,ALAS1,ALB,CCL15,FGFR4,FGL1,PLG,SERPINF2,ALDOB,NR0B2,AMBP,VTN,FMO5,HYAL1,SHBG,APCS,APOA1,APOA4,CPB2,APOB,APOC2,APOC3,APOC4,CPN2,APOH,ABCC6,ARG1,CRYAA,MST1,SLC10A1,IGFBP1,ASGR1,ASGR2,SLC22A1,AKR7A3,SERPINC1,CYP4F12,IHH,SLC37A4,PROC,CYP3A7,CYP2B6,CYP2C19,CYP2C…
MicroRNA	hsa-miR-409:miRTarbase	hsa-miR-409:miRTarbase	miRTarbase	1.519e-06	0.00414	0.00414	0.03514	4	6	FGA,FGB,FGG,ANG
Drug	C023036	perfluorooctanoic acid	CTD	7.79e-65	2.41e-60	2.41e-60	2.631e-59	140	1638	NAT2,ACADS,MAT1A,MBL2,HMGCS2,ACY1,F2,FOXA3,HNF4A,F5,TTR,F10,F11,F13B,FABP1,ABCB4,ADH4,PHYH,SERPINA1,SAA4,SERPINA4,AFM,AGXT,HPX,PKLR,FGA,FGB,AHSG,ACAA2,ALAS1,ALB,FGFR4,FGG,ABCC2,PLG,HSD17B2,SERPINF2,ALDOB,AMBP,VTN,PON1,APCS,SHH,UGT1A9,APOA1,APOA2,APOA4,APOB,APOC2,APOC3,APOC4,ABCC6,SLC2A2,CRP,ACOT12,ARG1,CRYAA,SEPHS2,SLC10A1,IGFBP1,SLC17A1,TSPO2,ASL,MTTP,DECR2,G6PC,SLC37A4,PROC,CYP3A7,PECR,CYP2B6,U…
Drug	C076994	perfluorooctane sulfonic acid	CTD	5.088e-60	1.574e-55	7.871e-56	8.592e-55	108	969	ACADS,MBL2,HMGCS2,FOXA2,F2,HNF4A,ONECUT1,F5,PANK1,TTR,F9,F10,F11,F12,F13B,FABP1,ABCB4,ADH4,SERPINA1,SAA4,AGXT,PKLR,FGA,FGB,ACAA2,ALAS1,FGFR4,FGG,ABCC2,SERPINF2,ALDOB,NR0B2,UGT1A6,APCS,APOA1,APOA2,APOA4,APOB,APOC2,ABCC6,SLC2A2,CRP,ARG1,UGT1A1,SLC10A1,IGFBP1,SLC17A1,TSPO2,AKR7A3,MTTP,ABCB11,SERPINC1,DECR2,G6PC,PROC,CYP3A7,CYP2B6,CYP2C19,CYP2C8,CYP2C9,CYP2C18,GALM,CYP2D6,SPINK1,CYP2E1,CYP3A4,CYP4A11…
Drug	C089730	rosiglitazone	CTD	3.475e-53	1.075e-48	3.583e-49	3.912e-48	124	1552	AADAC,ACADS,PDZK1,MBL2,ALDH8A1,HMGCS2,ACY1,TM6SF2,FOXA2,F2,HNF4A,F5,PANK1,LEAP2,F10,F12,FABP1,ADH4,ADH6,SERPINA4,AFM,AGT,NPC1L1,AGXT,PKLR,ACAA2,ALAS1,ALB,FGG,ABCC2,ALDOB,ALPI,HFE2,FMO5,PON1,APOA4,CYP4F2,APOB,APOC3,CPN1,MUC13,SLCO1B1,ABCC6,SLC2A2,CRP,ACOT12,ARG1,UGT1A1,UGT1A3,GBA3,AGXT2,IGF1R,OIT3,ASGR2,SLC22A1,MTTP,ABCB11,DECR2,G6PC,MOGAT3,SLC37A4,PROC,MASP2,CHCHD10,CYP2B6,CYP2C8,CYP2C18,CYP2D6,S…
Drug	CID000000303	sodium cholate	Stitch	4.632e-52	1.433e-47	3.583e-48	3.912e-47	71	408	AKR1C4,FOXA2,FOXA3,HNF4A,HNF4G,ONECUT1,TTR,FABP1,ABCB4,PHYH,NPC1L1,UGT2B4,UGT2B7,UGT2B10,UGT2B15,ALB,ABCC2,HSD17B2,NR0B2,ALPI,ONECUT2,ENPP7,UGT1A6,UGT1A5,UGT1A9,APOA1,APOA2,APOA4,APOB,APOC2,APOC3,APOC4,SLCO1B1,ABCC6,UGT1A4,UGT1A1,UGT1A3,GBA3,SLC10A1,AKR7L,NR5A2,MTTP,ABCB11,CYP2E1,CYP3A4,CYP3A5,CYP7A1,CYP8B1,BAAT,AKR1D1,SLC22A7,CFHR4,APOM,NR1I2,SULT2A1,FGF21,ABCG5,ABCG8,NR1I3,NR1H4,GOT1,SLC27A5,HN…
Drug	C057693	troglitazone	CTD	8.267e-49	2.558e-44	5.116e-45	5.585e-44	110	1306	AADAC,ACADS,MAT1A,PDZK1,MBL2,HMGCS2,TST,HNF4A,PANK1,TTPA,LEAP2,FABP1,ABCB4,ADH1C,ADH4,PHYH,SAA4,SERPINA4,AGT,NPC1L1,HPX,PKLR,HRG,ACAA2,ALB,ABCC2,HSD17B2,SERPINF2,ALDOB,ALPI,VIL1,VTN,FMO5,ANG,CYP3A43,APCS,APOA1,APOA2,CYP4F2,SCLY,CPN1,APOC4,MUC13,SLCO1B1,ABCC6,SLC2A2,ACOT12,ARG1,UGT1A4,UGT1A1,GBA3,AGXT2,OIT3,SLC10A1,IGFBP1,SLC22A1,MTTP,ABCB11,DECR2,G6PC,CYP3A7,CHCHD10,CYP2B6,CYP2C19,UPB1,CYP2C8,CYP…
Drug	CID000004763	phenobarbital	Stitch	1.207e-48	3.736e-44	6.226e-45	6.797e-44	65	360	PIPOX,AGT,AGXT,UGT2B4,UGT2B7,UGT2B10,UGT2B15,ALAS1,ABCC2,ALPI,CYP3A43,UGT1A6,UGT1A5,SHBG,UGT1A9,APOA1,APOA2,APOA4,CYP4F2,APOB,APOC2,APOC3,APOC4,SLCO1B1,ABCC6,ARG1,UGT1A4,UGT1A1,UGT1A3,OIT3,ABCB11,CYP4F12,G6PC,CYP3A7,CYP2B6,CYP2C19,CYP2C8,CYP2C9,CYP2C18,CYP2D6,CYP2E1,CYP3A4,CYP3A5,CYP4A11,CYP7A1,CYP8B1,ACY3,FTCD,CES2,CFHR4,APOM,GJB1,NR1I2,NR1I3,APOA5,GPT,RBP4,CYP4A22,GSTA1,GSTA2,ORM1,ORM2,OTC,UGT2…
Drug	CID000002796	clofibrate	Stitch	6.985e-48	2.161e-43	3.087e-44	3.371e-43	61	311	ACADS,PIPOX,FABP1,FGA,UGT2B4,FGB,UGT2B7,UGT2B10,UGT2B15,FGG,TMEM176B,CYP3A43,UGT1A6,UGT1A5,UGT1A9,APOA1,APOA2,APOA4,CYP4F2,APOB,APOC2,APOC3,APOC4,ACOT12,UGT1A4,UGT1A1,UGT1A3,DECR2,CYP4F12,G6PC,CYP3A7,CYP2B6,CYP2C19,CYP2C8,CYP2C9,CYP2C18,CYP2D6,CYP2E1,CYP3A4,CYP3A5,CYP4A11,CYP7A1,CYP8B1,BAAT,CFHR4,APOM,GJB1,NR1I2,ABCG5,NR1H4,SLC27A5,APOA5,ECHS1,CYP4A22,GSTA1,GSTA2,LIPC,EHHADH,LPA,CYP4F3,ACMSD
Drug	D009853	Omeprazole	CTD	5.868e-44	1.816e-39	2.269e-40	2.478e-39	62	375	HGD,ABCB4,ADH1C,ADH4,PHYH,SERPINA1,SERPINA4,OAF,AFM,AGT,PKLR,PLG,SERPINF2,UGT1A6,UGT1A5,APCS,UGT1A9,APOA4,CPN1,APOH,ABCC6,ACOT12,ARG1,UGT1A4,UGT1A1,UGT1A3,ASGR2,SLC22A1,AKR7A3,ABCB11,PROC,MASP2,CYP3A7,CYP2B6,CYP2C19,CYP2C9,CYP2C18,CYP2D6,CYP2E1,CYP3A4,CYP3A5,BAAT,ITIH4,CES2,GJB1,NR1I2,VNN1,C4BPA,C4BPB,C8B,SLC23A1,ABCG5,NR1I3,INHBE,NAT8,ECHS1,OTC,LIPC,EHHADH,SLC25A13,SERPINA10,HAO2
Drug	C016104	sodium bichromate	CTD	4.256e-42	1.317e-37	1.463e-38	1.597e-37	112	1590	HGD,NAT2,AADAC,TMED6,MAT1A,PDZK1,MBL2,GLYCTK,ALDH8A1,UNC93A,HMGCS2,HAO1,TST,F2,FOXA3,HNF4A,ONECUT1,F5,TTR,F10,FABP1,ABCB4,ADH4,PHYH,SERPINA1,AGT,HPX,PKLR,FGA,UGT2B7,ABCC2,PLG,ALDOB,GLTPD2,NR0B2,VIL1,SHBG,PON1,SLC5A9,APOB,ABCC6,SLC2A2,MST1,AGXT2,GDA,SLC10A1,IGFBP1,UNC5CL,SLC22A1,AKR7A3,ABCB11,SERPINC1,DECR2,G6PC,SLC37A4,MASP2,UPB1,CYP7A1,CYP8B1,BAAT,AKR1D1,DAO,CDHR5,GCKR,UROC1,FTCD,ANKS4B,DDC,ITIH…
Drug	D015058	1-Naphthylisothiocyanate	CTD	1.59e-39	4.919e-35	4.919e-36	5.37e-35	81	839	SLC17A2,AADAC,MBL2,HAO1,FOXA2,F2,F5,TTR,FABP1,ABCB4,PRODH2,SERPINA4,AFM,PKLR,FGA,FGB,FGG,ABCC2,HSD17B2,SERPINF2,NR0B2,HFE2,PON1,APOA4,APOB,APOC2,APOC4,SLC10A1,IGFBP1,SLC17A1,UNC5CL,ASL,SLC22A1,ABCB11,G6PC,ZG16,CYP2B6,CYP2C9,CYP2E1,INHBC,CYP7A1,CYP8B1,BAAT,DAO,GC,FTCD,DDC,SLC22A7,ITIH4,CES2,RTP3,GJB1,NR1I2,SULT2A1,ANGPTL3,C4BPB,C8G,C9,KLKB1,SLC23A1,ABCG5,ABCG8,NR1I3,KNG1,NR1H4,SLC27A5,SERPINA7,PAQ…
Disease	C0023903	Liver neoplasms	DisGeNET Curated	9.298e-42	4.267e-38	4.267e-38	3.844e-37	110	1318	NAT2,AADAC,HK1,MAT1A,PDZK1,MBL2,HMGCS2,FOXA2,F2,HNF4A,HNF4G,ONECUT1,TTR,F9,FABP1,ABCB4,ADH4,SERPINA1,MIA2,AFM,HPR,AGT,HPX,PKLR,FGA,FGB,AHSG,HRG,ALAS1,ALB,CCL16,FGFR4,ABCC2,PLG,SERPINF2,NR0B2,ALPI,HFE2,VTN,ANG,UGT1A6,SHBG,PON1,APCS,APOA1,CPB2,APOB,APOC2,APOC3,APOC4,APOH,SLC2A2,CRP,ACOT12,UGT1A1,MST1,IGF1R,SLC10A1,IGFBP1,ASL,MTTP,ABCB11,G6PC,PROC,CYP3A7,CYP2B6,CYP2C9,CYP2D6,MYO1A,SPINK1,CYP2E1,CYP3…
Disease	C0400966	Non-alcoholic Fatty Liver Disease	DisGeNET Curated	6.025e-24	2.765e-20	1.382e-20	1.245e-19	43	317	TM6SF2,F2,HNF4A,FABP1,ABCB4,SERPINA1,AGT,NPC1L1,AHSG,FGL1,ABCC2,NR0B2,SHH,CYP4F2,APOB,APOC3,SLC2A2,CRP,UGT1A1,MTTP,ABCB11,MOGAT3,CYP2B6,CYP2C19,CYP2C9,CYP2D6,SPINK1,CYP2E1,CYP3A4,GC,GCKR,NR1I2,FGF21,NR1H4,SLC27A5,APOA5,GPT,RBP4,LBP,LECT2,GSTA1,SLC25A13,CYP4F3
Disease	C0023895	Liver diseases	DisGeNET Curated	4.348e-22	1.995e-18	6.651e-19	5.992e-18	54	576	NAT2,IL32,MBL2,TM6SF2,FOXA2,F2,ONECUT1,F5,F9,ABCB4,ADH1C,SERPINA1,MIA2,HPD,AFM,ALB,CCL16,NR0B2,UGT1A6,UGT1A5,PON1,UGT1A9,APOA1,APOC3,SLCO1B1,CRP,UGT1A4,UGT1A1,UGT1A3,NR5A2,MTTP,ABCB11,G6PC,CYP2B6,CYP2C19,CYP2C9,CYP2D6,CYP2E1,CYP3A4,CYP7A1,AKR1D1,DDC,ITIH4,NR1I2,SULT2A1,SLC23A1,NR1I3,NR1H4,GPT,TM4SF5,EHHADH,SLC25A13,TM4SF4,SERPIND1
Disease	C0524620	Metabolic Syndrome X	DisGeNET Curated	2.764e-21	1.269e-17	3.172e-18	2.857e-17	50	511	PDZK1,TM6SF2,F2,HNF4A,F5,FABP1,SERPINA1,AGT,AHSG,ALB,PLG,NR0B2,VTN,SHBG,PON1,APOA1,APOA2,APOA4,CYP4F2,APOB,APOC3,APOC4,APOH,CRP,UGT1A1,IGF1R,IGFBP1,MTTP,SPINK1,CYP3A4,PDX1,GCKR,NR1I2,FGF21,ANGPTL3,ABCG5,ABCG8,NR1I3,NR1H4,GOT1,HNF1A,APOA5,GPT,RBP4,LBP,SERPINA6,LIPC,ACSM2A,PCK1,PCK2
Disease	C0027051	Myocardial Infarction	DisGeNET Curated	1.235e-20	5.665e-17	1.133e-17	1.021e-16	60	763	MBL2,AKR1C4,TM6SF2,F2,F5,TTR,F9,F11,ADH1C,SERPINA4,AGT,FGA,FGB,AHSG,HRG,ALB,FGG,PLG,SERPINF2,ANG,SHBG,PON1,APOA1,APOA2,APOA4,CPB2,CYP4F2,APOB,APOC3,APOH,SLCO1B1,CRP,ARG1,UGT1A1,MST1,MTTP,SERPINC1,CYP2B6,CYP2C19,CYP2C8,CYP2C9,CYP2D6,CYP3A4,CYP4A11,GATA4,PDX1,GCKR,NR1I2,ABCG5,KNG1,INHBE,APOA5,GPT,REG1A,LBP,SLC7A9,MLXIPL,LIPC,LPA,CYP4F3
Disease	C0007222	Cardiovascular Diseases	DisGeNET Curated	2.06e-20	9.453e-17	1.575e-17	1.419e-16	59	746	MAT1A,PDZK1,MBL2,TM6SF2,F2,F5,F11,F12,FABP1,ADH1C,HPD,AGT,FGA,FGB,AHSG,ALB,FGG,PLG,NR0B2,AMBP,SHBG,PON1,APOA1,APOA2,APOA4,CPB2,APOB,APOC2,APOC3,APOH,ABCC6,SLC2A2,CRP,ARG1,UGT1A1,AGXT2,IGFBP1,MTTP,PROC,CYP2B6,CYP2C19,CYP7A1,GATA4,BHMT,APOM,NR1I2,VNN1,ANGPTL3,ABCG5,ABCG8,KNG1,NR1H4,HNF1A,APOA5,RBP4,OTC,LIPC,LPA,HABP2
Disease	C0011849	Diabetes Mellitus	DisGeNET Curated	1.482e-19	6.799e-16	9.713e-17	8.751e-16	83	1456	NAT2,MBL2,FOXA2,F2,HNF4A,HNF4G,ONECUT1,F5,ADH1C,SERPINA1,AGT,NPC1L1,PKLR,FGB,UGT2B7,AHSG,ALAS1,ALB,FGFR4,PLG,SLC30A10,NR0B2,AMBP,SHBG,PON1,APCS,SHH,APOA1,APOA2,APOA4,APOB,APOC3,APOH,SLC2A2,CRP,IGF1R,IGFBP1,SLC22A1,NR5A2,MTTP,SERPINC1,G6PC,SLC37A4,CYP2B6,CYP2C19,CYP2C9,SPINK1,CYP2E1,CYP3A4,CYP7A1,CYP8B1,GATA4,PDX1,GC,GCKR,APOM,NR1I2,FGF21,ANGPTL3,ABCG5,ABCG8,NR1I3,KNG1,NR1H4,HNF1A,HNF1B,APOA5,GPT,…
Disease	C0015695	Fatty Liver	DisGeNET Curated	4.212e-19	1.933e-15	2.416e-16	2.177e-15	41	380	IL32,MAT1A,PDZK1,TM6SF2,F2,HNF4A,FABP1,SERPINA1,NPC1L1,AHSG,SHBG,PON1,APOA1,APOB,APOC3,APOC4,SLC2A2,CRP,MTTP,G6PC,CYP2B6,SPINK1,CYP2E1,CYP3A4,GC,GCKR,BHMT,NR1I2,FGF21,ANGPTL3,KHK,NR1H4,HNF1A,APOA5,GPT,SERPINA6,LECT2,MLXIPL,SLC25A13,CYP4F3,PCK2
Disease	C0011847	Diabetes	DisGeNET BeFree	7.272e-19	3.337e-15	3.708e-16	3.341e-15	76	1279	NAT2,MBL2,FOXA2,F2,HNF4A,HNF4G,F5,ADH1C,SERPINA1,AGT,PKLR,FGB,AHSG,ALAS1,ALB,FGFR4,PLG,SLC30A10,NR0B2,SHBG,PON1,APCS,SHH,APOA1,APOA2,APOA4,APOB,APOC3,APOH,SLC2A2,CRP,IGF1R,IGFBP1,SLC22A1,NR5A2,MTTP,SERPINC1,G6PC,SLC37A4,CYP2B6,CYP2C19,CYP2C9,SPINK1,CYP2E1,CYP7A1,CYP8B1,GATA4,PDX1,GC,GCKR,APOM,NR1I2,FGF21,ANGPTL3,ABCG5,ABCG8,KNG1,NR1H4,HNF1A,HNF1B,APOA5,GPT,RBP4,REG1A,GSTA1,SLC7A9,MLXIPL,LIPC,TREH…
Disease	C0011860	Diabetes Mellitus, Non-Insulin-Dependent	DisGeNET Curated	2.231e-18	1.024e-14	1.024e-15	9.222e-15	80	1427	NAT2,HK1,MAT1A,MBL2,TM6SF2,FOXA2,F2,HNF4A,ONECUT1,F5,TTR,FABP1,ADH1C,AGT,NPC1L1,HPX,PKLR,FGB,AHSG,UGT2B15,ALB,FGFR4,PLG,SLC30A10,NR0B2,VTN,SHBG,PON1,APOA1,APOA2,APOA4,APOB,APOC2,APOC3,APOC4,SLCO1B1,SLC2A2,CRP,UGT1A1,AGXT2,IGF1R,IGFBP1,SLC22A1,MTTP,G6PC,CYP2B6,SLC16A13,CYP2C19,CYP2C9,CYP2C18,SPINK1,CYP3A5,GATA4,PDX1,GC,GCKR,BHMT,APOM,NR1I2,FGF21,ABCG5,ABCG8,NR1I3,KNG1,NR1H4,HNF1A,HNF1B,APOA5,GPT,R…

## Sheet: Supplementary Table 3
Category	ID	Name	Source	p-value	q-value Bonferroni	q-value FDR B&H	q-value FDR B&Y	Hit Count in Query List	Hit Count in Genome	Hit in Query List
GO: Molecular Function	GO:0019838	growth factor binding		1.372e-12	5.816e-10	5.816e-10	3.855e-09	15	142	A2M,COL4A1,COL6A1,FLT1,HTRA1,PDGFB,PDGFRB,ACVRL1,TEK,IGFBP5,CYR61,KDR,CTGF,FGFR1,HYAL2
GO: Molecular Function	GO:0005201	extracellular matrix structural constituent		2.198e-08	9.319e-06	4.66e-06	3.088e-05	9	78	COL4A1,COL4A2,EFEMP2,LAMA4,BGN,MGP,PRELP,COL14A1,ELN
GO: Molecular Function	GO:0019199	transmembrane receptor protein kinase activity		1.14e-06	0.0004832	0.0001611	0.001067	8	91	FLT1,PDGFRL,PDGFRB,ACVRL1,TEK,BMPR1A,KDR,FGFR1
GO: Molecular Function	GO:0048407	platelet-derived growth factor binding		2.442e-06	0.001035	0.0002579	0.001709	4	12	COL4A1,COL6A1,PDGFB,PDGFRB
GO: Molecular Function	GO:0005539	glycosaminoglycan binding		3.041e-06	0.001289	0.0002579	0.001709	11	219	CCDC80,SMOC2,BGN,FSTL1,CYR61,PRELP,SLIT3,CTGF,EGFLAM,FGFR1,HYAL2
GO: Molecular Function	GO:0050839	cell adhesion molecule binding		1.27e-05	0.005385	0.0008974	0.005948	10	208	FBLN5,VWF,LAMB2,CPE,THY1,CYR61,KDR,CTGF,FGFR1,NOS3
GO: Molecular Function	GO:0004714	transmembrane receptor protein tyrosine kinase activity		2.343e-05	0.009936	0.001419	0.009409	6	67	FLT1,PDGFRL,PDGFRB,TEK,KDR,FGFR1
GO: Molecular Function	GO:0005019	platelet-derived growth factor beta-receptor activity		7.369e-05	0.03124	0.003777	0.02504	2	2	PDGFRL,PDGFRB
GO: Molecular Function	GO:0005178	integrin binding		8.321e-05	0.03528	0.003777	0.02504	7	121	FBLN5,VWF,LAMB2,THY1,CYR61,KDR,CTGF
GO: Molecular Function	GO:0005520	insulin-like growth factor binding		9.077e-05	0.03849	0.003777	0.02504	4	28	HTRA1,IGFBP5,CYR61,CTGF
GO: Biological Process	GO:0001944	vasculature development		1.387e-19	4.101e-16	4.101e-16	3.514e-15	37	677	COL4A1,FOXS1,COL4A2,GPR4,FLT1,NPR1,RAMP2,PDGFB,RHOJ,DLL4,PDGFRB,SOX17,LAMA4,SOX18,CCDC80,ACVRL1,TEK,FGF18,NR2F2,ARHGEF15,EDNRA,FZD4,GJA4,GJA5,THY1,CYR61,NFATC4,ECSCR,PARVA,MMRN2,ANTXR1,KDR,CTGF,FGFR1,CDH5,NOS3,NOTCH4
GO: Biological Process	GO:0072358	cardiovascular system development		1.009e-18	2.983e-15	9.942e-16	8.52e-15	44	1058	COL4A1,FOXS1,COL4A2,GPR4,FLT1,NPR1,RAMP2,PDGFB,RHOJ,DLL4,PDGFRB,SOX17,LAMA4,ID3,SOX18,CCDC80,CPE,ACVRL1,TEK,FGF18,NR2F2,ARHGEF15,EDNRA,FZD4,MSX1,GJA4,GJA5,BMPR1A,THY1,CYR61,NFATC4,ECSCR,KCNJ8,PARVA,MMRN2,ANTXR1,COL14A1,KDR,CLDN5,CTGF,FGFR1,CDH5,NOS3,NOTCH4
GO: Biological Process	GO:0072359	circulatory system development		1.009e-18	2.983e-15	9.942e-16	8.52e-15	44	1058	COL4A1,FOXS1,COL4A2,GPR4,FLT1,NPR1,RAMP2,PDGFB,RHOJ,DLL4,PDGFRB,SOX17,LAMA4,ID3,SOX18,CCDC80,CPE,ACVRL1,TEK,FGF18,NR2F2,ARHGEF15,EDNRA,FZD4,MSX1,GJA4,GJA5,BMPR1A,THY1,CYR61,NFATC4,ECSCR,KCNJ8,PARVA,MMRN2,ANTXR1,COL14A1,KDR,CLDN5,CTGF,FGFR1,CDH5,NOS3,NOTCH4
GO: Biological Process	GO:0001568	blood vessel development		2.635e-18	7.79e-15	1.947e-15	1.669e-14	35	651	COL4A1,FOXS1,COL4A2,GPR4,FLT1,NPR1,RAMP2,PDGFB,DLL4,PDGFRB,SOX17,LAMA4,SOX18,CCDC80,ACVRL1,TEK,FGF18,NR2F2,EDNRA,FZD4,GJA4,GJA5,THY1,CYR61,NFATC4,ECSCR,PARVA,MMRN2,ANTXR1,KDR,CTGF,FGFR1,CDH5,NOS3,NOTCH4
GO: Biological Process	GO:0030198	extracellular matrix organization		5.74e-17	1.697e-13	3.03e-14	2.596e-13	26	354	A2M,COL4A1,THSD4,COL4A2,COL6A1,FBLN5,HTRA1,RAMP2,VWF,PDGFB,APBB2,LAMA4,LAMB2,CCDC80,VWA1,SMOC2,BGN,JAM2,PHLDB1,CYR61,ANTXR1,COL14A1,KDR,CTGF,EGFLAM,ELN
GO: Biological Process	GO:0043062	extracellular structure organization		6.15e-17	1.818e-13	3.03e-14	2.596e-13	26	355	A2M,COL4A1,THSD4,COL4A2,COL6A1,FBLN5,HTRA1,RAMP2,VWF,PDGFB,APBB2,LAMA4,LAMB2,CCDC80,VWA1,SMOC2,BGN,JAM2,PHLDB1,CYR61,ANTXR1,COL14A1,KDR,CTGF,EGFLAM,ELN
GO: Biological Process	GO:0048514	blood vessel morphogenesis		6.815e-16	2.015e-12	2.878e-13	2.466e-12	30	551	COL4A1,COL4A2,GPR4,FLT1,NPR1,RAMP2,PDGFB,DLL4,PDGFRB,SOX17,SOX18,CCDC80,ACVRL1,TEK,FGF18,NR2F2,EDNRA,FZD4,GJA5,THY1,CYR61,NFATC4,ECSCR,PARVA,MMRN2,KDR,CTGF,FGFR1,NOS3,NOTCH4
GO: Biological Process	GO:0001525	angiogenesis		4.52e-15	1.336e-11	1.67e-12	1.431e-11	27	464	COL4A1,COL4A2,GPR4,FLT1,NPR1,RAMP2,DLL4,PDGFRB,SOX17,SOX18,CCDC80,ACVRL1,TEK,FGF18,EDNRA,GJA5,THY1,CYR61,NFATC4,ECSCR,PARVA,MMRN2,KDR,CTGF,FGFR1,NOS3,NOTCH4
GO: Biological Process	GO:0060429	epithelium development		1.059e-12	3.13e-09	3.478e-10	2.98e-09	40	1296	COL4A1,GPR4,FLT1,PDGFB,DLL4,PODXL,SOX17,ID3,LAMB2,SOX18,ACVRL1,TEK,NR2F2,EDNRA,LDB2,PGR,TGFB1I1,FZD4,MSX1,GJA4,GJA5,BMPR1A,IGFBP5,MGP,CYR61,ADAMTS9,NFATC4,TJP1,NFIB,FRZB,PRICKLE2,KDR,CLDN5,CTGF,FGFR1,TAGLN,PBX1,CDH5,CNN3,NOTCH4
GO: Biological Process	GO:0009887	animal organ morphogenesis		1.258e-12	3.719e-09	3.719e-10	3.187e-09	37	1121	FLT1,HTRA1,PCGF2,PDGFB,DLL4,PDGFRB,SOX17,ID3,SOX18,CPE,MFRP,TEK,FGF18,EDNRA,PGR,LIMS2,FZD4,MSX1,GJA5,BMPR1A,THY1,IGFBP5,MGP,CYR61,NFIB,TLE2,FRZB,SLIT3,PARVA,PRICKLE2,KDR,CLDN5,CTGF,FGFR1,ELN,PBX1,HYAL2
GO: Cellular Component	GO:0031012	extracellular matrix		1.956e-17	6.004e-15	6.004e-15	3.786e-14	29	444	COL4A1,THSD4,COL4A2,COL6A1,FBLN5,HTRA1,VWF,LMCD1,EFEMP2,LAMA4,LAMB2,CCDC80,VWA1,SMOC2,CRIP2,BGN,TGFB1I1,MGP,CYR61,TIMP3,ADAMTS9,PRELP,SLIT3,MMRN2,COL14A1,CTGF,EGFLAM,SPARCL1,ELN
GO: Cellular Component	GO:0005578	proteinaceous extracellular matrix		3.138e-15	9.633e-13	4.817e-13	3.037e-12	25	379	COL4A1,THSD4,COL4A2,COL6A1,FBLN5,VWF,EFEMP2,LAMA4,LAMB2,CCDC80,VWA1,SMOC2,BGN,MGP,CYR61,TIMP3,ADAMTS9,PRELP,SLIT3,MMRN2,COL14A1,CTGF,EGFLAM,SPARCL1,ELN
GO: Cellular Component	GO:0044420	extracellular matrix component		9.917e-14	3.045e-11	1.015e-11	6.399e-11	16	141	COL4A1,THSD4,COL4A2,COL6A1,FBLN5,EFEMP2,LAMA4,LAMB2,CCDC80,VWA1,SMOC2,TIMP3,MMRN2,COL14A1,EGFLAM,ELN
GO: Cellular Component	GO:0005604	basement membrane		2.879e-09	8.839e-07	2.21e-07	1.393e-06	11	109	COL4A1,COL4A2,EFEMP2,LAMA4,LAMB2,CCDC80,VWA1,SMOC2,TIMP3,MMRN2,EGFLAM
GO: Cellular Component	GO:0005912	adherens junction		4.711e-08	1.446e-05	2.893e-06	1.824e-05	19	484	NPHP1,MAGI1,FLT1,PDGFRB,ASAP3,ESAM,TEK,LIMS2,TGFB1I1,SLC9A3R2,TMEM47,THY1,WTIP,TJP1,TLE2,PARVA,FERMT2,CDH5,CNN3
GO: Cellular Component	GO:0070161	anchoring junction		8.615e-08	2.645e-05	4.408e-06	2.779e-05	19	503	NPHP1,MAGI1,FLT1,PDGFRB,ASAP3,ESAM,TEK,LIMS2,TGFB1I1,SLC9A3R2,TMEM47,THY1,WTIP,TJP1,TLE2,PARVA,FERMT2,CDH5,CNN3
GO: Cellular Component	GO:0005614	interstitial matrix		1.906e-07	5.852e-05	8.361e-06	5.272e-05	5	16	CCDC80,VWA1,SMOC2,COL14A1,EGFLAM
GO: Cellular Component	GO:0009986	cell surface		5.861e-07	0.0001799	2.249e-05	0.0001418	24	873	TSPAN15,BOC,RAMP2,VWF,RAMP3,PDGFB,PDGFRB,MXRA8,ACVRL1,TEK,BGN,FZD4,BMPR1A,THY1,ADAMTS9,TJP1,ANTXR1,KDR,BCAM,FERMT2,CDH5,SDC2,HYAL2,NOTCH4
GO: Cellular Component	GO:0030054	cell junction		5.049e-06	0.00155	0.0001722	0.001086	27	1200	NPHP1,MAGI1,FLT1,PDGFRB,PODXL,ASAP3,ESAM,TEK,JAM2,LIMS2,TGFB1I1,FZD4,SLC9A3R2,GJA4,GJA5,TMEM47,THY1,WTIP,TJP1,TLE2,PARVA,KDR,CLDN5,EGFLAM,FERMT2,CDH5,CNN3
GO: Cellular Component	GO:0005923	bicellular tight junction		6.666e-05	0.02046	0.002008	0.01266	7	115	NPHP1,MAGI1,ESAM,JAM2,TJP1,CLDN5,CDH5
Mouse Phenotype	MP:0001614	abnormal blood vessel morphology		1.996e-17	6.292e-14	6.292e-14	5.432e-13	52	1233	COL4A1,FOXS1,FKBP10,GPR4,FLT1,NPR1,FBLN5,PCGF2,RAMP2,VWF,PDGFB,RHOJ,DLL4,PDGFRB,RGS5,EFEMP2,SOX17,LAMA4,ID3,ESAM,SOX18,ACVRL1,TEK,FGF18,NR2F2,ARHGEF15,EDNRA,PGR,LIMS2,FZD4,MSX1,GJA4,GJA5,BMPR1A,FSTL1,MGP,CYR61,TIMP3,NFATC4,TJP1,ECSCR,SLIT3,PARVA,KDR,CTGF,FGFR1,BCAM,TAGLN,PBX1,CDH5,NOS3,NOTCH4
Mouse Phenotype	MP:0000260	abnormal angiogenesis		3.72e-14	1.173e-10	5.865e-11	5.064e-10	28	407	GPR4,FLT1,FBLN5,PCGF2,RAMP2,RHOJ,DLL4,PDGFRB,ID3,ESAM,ACVRL1,TEK,NR2F2,ARHGEF15,EDNRA,FZD4,BMPR1A,FSTL1,CYR61,TIMP3,NFATC4,TJP1,PARVA,KDR,CTGF,CDH5,NOS3,NOTCH4
Mouse Phenotype	MP:0002128	abnormal blood circulation		1.085e-13	3.419e-10	1.14e-10	9.841e-10	36	729	COL4A1,FOXS1,COL4A2,GPR4,FLT1,NPR1,FBLN5,RAMP2,VWF,PDGFB,RHOJ,DLL4,PDGFRB,EFEMP2,SOX17,LAMA4,ID3,SOX18,ACVRL1,TEK,NR2F2,PGR,FZD4,MSX1,GJA4,GJA5,BMPR1A,MGP,CYR61,ECSCR,SLIT3,PARVA,KDR,TAGLN,FERMT2,NOS3
Mouse Phenotype	MP:0001914	hemorrhage		2.825e-13	8.907e-10	1.91e-10	1.649e-09	32	589	COL4A1,FOXS1,COL4A2,GPR4,RAMP2,VWF,PDGFB,RHOJ,PDGFRB,EFEMP2,SOX17,LAMA4,ID3,SOX18,ACVRL1,TEK,NR2F2,PGR,FZD4,MSX1,GJA4,GJA5,BMPR1A,MGP,CYR61,ECSCR,SLIT3,PARVA,KDR,TAGLN,FERMT2,NOS3
Mouse Phenotype	MP:0000259	abnormal vascular development		3.029e-13	9.549e-10	1.91e-10	1.649e-09	31	552	GPR4,FLT1,FBLN5,PCGF2,RAMP2,RHOJ,DLL4,PDGFRB,ID3,ESAM,ACVRL1,TEK,NR2F2,ARHGEF15,EDNRA,FZD4,BMPR1A,FSTL1,CYR61,TIMP3,NFATC4,TJP1,ECSCR,PARVA,KDR,CTGF,FGFR1,PBX1,CDH5,NOS3,NOTCH4
Mouse Phenotype	MP:0005592	abnormal vascular smooth muscle morphology		1.36e-12	4.287e-09	7.144e-10	6.168e-09	15	103	GPR4,RAMP2,PDGFB,DLL4,PDGFRB,EFEMP2,SOX17,ACVRL1,PGR,MSX1,BMPR1A,MGP,PARVA,KDR,TAGLN
Mouse Phenotype	MP:0000767	abnormal smooth muscle morphology		2.086e-12	6.578e-09	9.397e-10	8.113e-09	17	148	GPR4,RAMP2,PDGFB,DLL4,PDGFRB,EFEMP2,SOX17,ACVRL1,NR2F2,PGR,MSX1,BMPR1A,MGP,PARVA,KDR,TAGLN,NOS3
Mouse Phenotype	MP:0001544	abnormal cardiovascular system physiology		3.685e-12	1.162e-08	1.453e-09	1.254e-08	51	1588	COL4A1,FOXS1,COL4A2,GPR4,FLT1,NPR1,FBLN5,RAMP2,VWF,PDGFB,RHOJ,DLL4,PDGFRB,RGS5,EFEMP2,SOX17,LAMA4,ID3,ESAM,SOX18,ACVRL1,TEK,NR2F2,PGR,LIMS2,TGFB1I1,FZD4,MSX1,GJA4,GJA5,BMPR1A,FSTL1,MGP,CYR61,TIMP3,NFATC4,ECSCR,KCNJ8,SLIT3,PARVA,SGCE,KDR,CLDN5,FGFR1,TAGLN,FERMT2,CDH5,NOS3,PCDH18,NOTCH4,RCAN2
Mouse Phenotype	MP:0002191	abnormal artery morphology		3.575e-11	1.127e-07	1.252e-08	1.081e-07	28	539	FKBP10,FLT1,NPR1,FBLN5,PCGF2,RAMP2,VWF,PDGFB,DLL4,PDGFRB,RGS5,EFEMP2,SOX17,ACVRL1,TEK,EDNRA,FZD4,MSX1,GJA5,MGP,CYR61,TIMP3,NFATC4,KDR,TAGLN,CDH5,NOS3,NOTCH4
Mouse Phenotype	MP:0003279	aneurysm		6.564e-11	2.07e-07	2.07e-08	1.787e-07	11	57	HTRA1,PDGFB,PDGFRB,EFEMP2,SOX17,MSX1,MGP,TIMP3,PARVA,TAGLN,NOS3
Domain	IPR009030	Growth_fac_rcpt_	InterPro	1.548e-07	0.0001503	0.0001503	0.001121	11	156	FBLN5,HTRA1,DLL4,EFEMP2,LAMB2,TEK,IGFBP5,CYR61,SLIT3,CTGF,NOTCH4
Domain	SM00181	EGF	SMART	1.417e-06	0.001376	0.0003205	0.00239	12	236	FBLN5,PAMR1,DLL4,EFEMP2,LAMA4,LAMB2,TEK,CLEC14A,SLIT3,EGFLAM,HYAL2,NOTCH4
Domain	2.60.40.10	-	Gene3D	1.958e-06	0.001901	0.0003205	0.00239	20	663	BOC,FLT1,PDGFRL,PDGFRB,MXRA8,ESAM,EBF1,ISLR,SEMA3G,VWA1,TEK,JAM2,THY1,NFATC4,COL14A1,KDR,EGFLAM,FGFR1,BCAM,EBF4
Domain	IPR000742	EGF-like_dom	InterPro	2.584e-06	0.002509	0.0003205	0.00239	12	250	FBLN5,PAMR1,DLL4,EFEMP2,LAMA4,LAMB2,TEK,CLEC14A,SLIT3,EGFLAM,HYAL2,NOTCH4
Domain	PF00412	LIM	Pfam	2.673e-06	0.002595	0.0003205	0.00239	7	69	LMCD1,LIMS3,CRIP2,LIMS2,TGFB1I1,WTIP,PRICKLE2
Domain	PS00478	LIM_DOMAIN_1	PROSITE	3.246e-06	0.003152	0.0003205	0.00239	7	71	LMCD1,LIMS3,CRIP2,LIMS2,TGFB1I1,WTIP,PRICKLE2
Domain	IPR001781	Znf_LIM	InterPro	3.246e-06	0.003152	0.0003205	0.00239	7	71	LMCD1,LIMS3,CRIP2,LIMS2,TGFB1I1,WTIP,PRICKLE2
Domain	SM00132	LIM	SMART	3.246e-06	0.003152	0.0003205	0.00239	7	71	LMCD1,LIMS3,CRIP2,LIMS2,TGFB1I1,WTIP,PRICKLE2
Domain	PS50023	LIM_DOMAIN_2	PROSITE	3.246e-06	0.003152	0.0003205	0.00239	7	71	LMCD1,LIMS3,CRIP2,LIMS2,TGFB1I1,WTIP,PRICKLE2
Domain	PS00022	EGF_1	PROSITE	3.301e-06	0.003205	0.0003205	0.00239	12	256	FBLN5,PAMR1,DLL4,EFEMP2,LAMA4,LAMB2,TEK,CLEC14A,SLIT3,EGFLAM,HYAL2,NOTCH4
Pathway	M5884	Ensemble of genes encoding core extracellular matrix including ECM glycoproteins, collagens and proteoglycans	MSigDB C2 BIOCARTA (v6.0)	7.259e-16	5.386e-13	5.386e-13	3.871e-12	23	275	COL4A1,THSD4,COL4A2,COL6A1,FBLN5,VWF,EFEMP2,LAMA4,LAMB2,VWA1,SMOC2,BGN,IGFBP5,MGP,CYR61,PRELP,SLIT3,MMRN2,COL14A1,CTGF,EGFLAM,SPARCL1,ELN
Pathway	M5889	Ensemble of genes encoding extracellular matrix and extracellular matrix-associated proteins	MSigDB C2 BIOCARTA (v6.0)	9.083e-15	6.74e-12	3.37e-12	2.422e-11	39	1028	A2M,COL4A1,THSD4,COL4A2,COL6A1,FBLN5,HTRA1,VWF,PAMR1,PDGFB,INHBB,EFEMP2,LAMA4,LAMB2,SEMA3G,VWA1,SMOC2,FGF18,BGN,ITIH5,FSTL1,IGFBP5,MGP,CYR61,TIMP3,ADAMTS9,CLEC14A,PRELP,FRZB,SLIT3,MMRN2,COL14A1,CTGF,EGFLAM,SPARCL1,ELN,SDC2,HYAL2,EMCN
Pathway	M3008	Genes encoding structural ECM glycoproteins	MSigDB C2 BIOCARTA (v6.0)	3.367e-12	2.498e-09	8.328e-10	5.985e-09	17	196	THSD4,FBLN5,VWF,EFEMP2,LAMA4,LAMB2,VWA1,SMOC2,IGFBP5,MGP,CYR61,SLIT3,MMRN2,CTGF,EGFLAM,SPARCL1,ELN
Pathway	1270244	Extracellular matrix organization	BioSystems: REACTOME	2.438e-09	1.809e-06	4.523e-07	3.251e-06	17	298	A2M,COL4A1,COL4A2,COL6A1,FBLN5,HTRA1,PDGFB,EFEMP2,LAMA4,LAMB2,BGN,JAM2,ADAMTS9,COL14A1,KDR,ELN,SDC2
Pathway	83067	Focal adhesion	BioSystems: KEGG	4.334e-08	3.216e-05	6.431e-06	4.622e-05	13	199	COL4A1,COL4A2,COL6A1,FLT1,VWF,PDGFB,PDGFRB,PIK3R3,LAMA4,LAMB2,MYL9,PARVA,KDR
Pathway	692234	PI3K-Akt signaling pathway	BioSystems: KEGG	1.203e-07	8.925e-05	1.487e-05	0.0001069	16	342	COL4A1,COL4A2,COL6A1,FLT1,VWF,PDGFB,PDGFRB,PIK3R3,LAMA4,LAMB2,TEK,FGF18,KDR,FGFR1,GNG11,NOS3
Pathway	P00005	Angiogenesis	PantherDB	1.561e-07	0.0001158	1.655e-05	0.0001189	11	150	PDGFB,DLL4,PDGFRB,PIK3R3,TEK,TGFB1I1,FRZB,KDR,FGFR1,NOS3,NOTCH4
Pathway	SMP00376	Amlodipine Pathway	SMPDB	2.048e-05	0.01519	0.001085	0.0078	4	18	CALD1,EDNRA,MYL9,KCNJ8
Pathway	SMP00379	Nifedipine Pathway	SMPDB	2.048e-05	0.01519	0.001085	0.0078	4	18	CALD1,EDNRA,MYL9,KCNJ8
Pathway	SMP00380	Nimodipine Pathway	SMPDB	2.048e-05	0.01519	0.001085	0.0078	4	18	CALD1,EDNRA,MYL9,KCNJ8
Pubmed	27068509	Extracellular matrix remodelling in response to venous hypertension: proteomics of human varicose veins.	Pubmed	7.218e-22	9.368e-18	9.368e-18	9.413e-17	17	146	COL4A1,COL4A2,COL6A1,FBLN5,HTRA1,VWF,LAMA4,LAMB2,VWA1,BGN,MGP,TIMP3,PRELP,COL14A1,SPARCL1,BCAM,SDC2
Pubmed	20551380	Proteomics characterization of extracellular space components in the human aorta.	Pubmed	2.556e-19	3.317e-15	1.659e-15	1.667e-14	14	101	COL4A2,COL6A1,FBLN5,HTRA1,LMCD1,LAMB2,CRIP2,BGN,TGFB1I1,MGP,TIMP3,PRELP,FRZB,COL14A1
Pubmed	22261194	Proteomics analysis of cardiac extracellular matrix remodeling in a porcine model of ischemia/reperfusion injury.	Pubmed	1.066e-14	1.384e-10	4.613e-11	4.636e-10	10	64	COL4A1,COL4A2,COL6A1,LAMA4,LAMB2,BGN,ADAMTS9,PRELP,FRZB,COL14A1
Pubmed	27559042	Glycoproteomics Reveals Decorin Peptides With Anti-Myostatin Activity in Human Atrial Fibrillation.	Pubmed	2.421e-14	3.143e-10	7.857e-11	7.895e-10	11	99	COL4A1,COL4A2,COL6A1,LAMA4,LAMB2,BGN,MGP,TIMP3,PRELP,ELN,BCAM
Pubmed	23376485	Proteomic analysis of podocyte exosome-enriched fraction from normal human urine.	Pubmed	1.163e-11	1.51e-07	3.02e-08	3.034e-07	27	1743	A2M,TSPAN15,COL4A2,COL6A1,FBLN5,HTRA1,VWF,PDGFRB,PODXL,EFEMP2,MXRA8,ESAM,CPE,ISLR,VWA1,BGN,FZD4,SLC9A3R2,THY1,TIMP3,CLEC14A,MMRN2,ANTXR1,COL14A1,CLDN5,SPARCL1,BCAM
Pubmed	23979707	SILAC-based proteomics of human primary endothelial cell morphogenesis unveils tumor angiogenic markers.	Pubmed	4.594e-10	5.963e-06	9.706e-07	9.753e-06	9	131	COL4A1,THSD4,COL4A2,HTRA1,VWF,PDGFB,MGP,CLEC14A,MMRN2
Pubmed	20673868	A genetic association study of maternal and fetal candidate genes that predispose to preterm prelabor rupture of membranes (PROM).	Pubmed	5.68e-10	7.372e-06	9.706e-07	9.753e-06	10	187	COL4A1,COL4A2,FLT1,NPR1,VWF,PDGFB,GJA4,MGP,ELN,NOS3
Pubmed	20452482	Identification of fetal and maternal single nucleotide polymorphisms in candidate genes that predispose to spontaneous preterm labor with intact membranes.	Pubmed	5.983e-10	7.765e-06	9.706e-07	9.753e-06	10	188	COL4A1,COL4A2,FLT1,NPR1,VWF,PDGFB,GJA4,MGP,ELN,NOS3
Pubmed	12975309	The secreted protein discovery initiative (SPDI), a large-scale effort to identify novel human secreted and transmembrane proteins: a bioinformatics assessment.	Pubmed	3.37e-09	4.374e-05	4.86e-06	4.884e-05	18	987	THSD4,TSPAN15,BOC,FBLN5,PAMR1,DLL4,EFEMP2,MXRA8,ESAM,ISLR,OLFML3,FGF18,ITIH5,JAM2,CXorf36,CLEC14A,SLIT3,SGCE
Pubmed	19453261	High-density association study of 383 candidate genes for volumetric BMD at the femoral neck and lumbar spine among older men.	Pubmed	4.608e-09	5.981e-05	5.981e-06	6.01e-05	12	383	FLT1,FGF18,BGN,FZD4,MSX1,BMPR1A,IGFBP5,MGP,FRZB,KDR,CTGF,FGFR1
Interaction	int:MMP2	MMP2 interactions		6.22e-07	0.001809	0.001809	0.01548	7	55	A2M,COL4A1,COL4A2,COL6A1,TIMP3,COL14A1,FGFR1
Interaction	int:LOXL1	LOXL1 interactions		2.496e-05	0.0726	0.0342	0.2925	3	7	A2M,FBLN5,ELN
Interaction	int:MMP9	MMP9 interactions		4.703e-05	0.1368	0.0342	0.2925	5	44	COL4A1,COL4A2,COL6A1,TIMP3,COL14A1
Interaction	int:COL2A1	COL2A1 interactions		4.703e-05	0.1368	0.0342	0.2925	5	44	COL6A1,HTRA1,PDGFB,BGN,PRELP
Interaction	int:FBLN2	FBLN2 interactions		6.011e-05	0.1749	0.03497	0.2991	4	24	COL4A1,COL4A2,PRELP,ELN
Interaction	int:TGFBI	TGFBI interactions		0.0001146	0.3333	0.04772	0.4081	3	11	A2M,COL4A1,COL4A2
Interaction	int:TGFB1	TGFB1 interactions		0.0001148	0.334	0.04772	0.4081	6	84	HTRA1,LRRC32,ACVRL1,BGN,CTGF,SDC2
Cytoband	3p14.1	3p14.1		0.0002296	0.03215	0.03215	0.1775	3	25	MAGI1,ADAMTS9,PRICKLE2
Cytoband	21q21.2	21q21.2		0.0006264	0.0877	0.04385	0.2421	2	8	JAM2,CYYR1
Transcription Factor Binding Site	RYTTCCTG_V$ETS2_B	RYTTCCTG_V$ETS2_B		3.986e-06	0.002108	0.002108	0.01444	27	868	FLT1,RAMP2,CALD1,PDGFB,RHOJ,DLL4,PDGFRB,MYCT1,ID3,ESAM,ZNF205,ARHGEF15,LDB2,MSX1,GJA5,FSTL1,USHBP1,CASKIN2,PRICKLE2,CLDN5,GNG11,CDH5,EPB41L1,HYAL2,NOTCH4,RCAN2,NOVA2
Gene Family	594	Immunoglobulin like domain containing|Interleukin receptors|TIR domain containing	genenames.org	5.584e-07	5.082e-05	5.082e-05	0.0002588	10	193	BOC,FLT1,PDGFRL,PDGFRB,ESAM,SEMA3G,TEK,THY1,KDR,BCAM
Gene Family	1218	LIM domain containing	genenames.org	2.342e-06	0.0002131	0.0001065	0.0005427	6	59	LMCD1,LIMS3,CRIP2,TGFB1I1,WTIP,PRICKLE2
Gene Family	321	Receptor Tyrosine Kinases|Protein phosphatase 1 regulatory subunits	genenames.org	6.028e-06	0.0005485	0.0001828	0.0009313	5	40	FLT1,PDGFRB,TEK,KDR,FGFR1
Gene Family	593	Fibronectin type III domain containing|I-set domain containing|Immunoglobulin like domain containing	genenames.org	1.078e-05	0.0009812	0.0002453	0.001249	8	161	BOC,FLT1,PDGFRL,PDGFRB,ISLR,JAM2,KDR,FGFR1
Gene Family	1278	SPARC family	genenames.org	1.492e-05	0.001357	0.0002715	0.001383	3	8	SMOC2,FSTL1,SPARCL1
Gene Family	471	CD molecules|Tumor necrosis factor superfamily	genenames.org	5.558e-05	0.005057	0.0008429	0.004293	11	394	PDGFRB,TEK,JAM2,FZD4,BMPR1A,THY1,KDR,FGFR1,BCAM,CDH5,SDC2
Gene Family	718	Receptor (G protein-coupled) activity modifying proteins	genenames.org	0.0001267	0.01153	0.001647	0.008391	2	3	RAMP2,RAMP3
Gene Family	490	Collagens	genenames.org	0.0002296	0.0209	0.002552	0.013	4	46	COL4A1,COL4A2,COL6A1,COL14A1
Gene Family	1163	LIM zinc finger domain containing	genenames.org	0.0002524	0.02296	0.002552	0.013	2	4	LIMS3,LIMS2
Gene Family	1046	CYR61/CTGF/NOV matricellular proteins	genenames.org	0.0006255	0.05692	0.005692	0.02899	2	6	CYR61,CTGF
Coexpression	19038878-SuppTable3	Human Leukemia_Lenz08_385genes	GeneSigDB	2.185e-32	1.468e-28	1.468e-28	1.378e-27	37	349	HTRA1,VWF,LARP6,CALD1,RHOJ,EFEMP2,MXRA8,LAMA4,LAMB2,CCDC80,RASL12,ISLR,MFRP,NR2F2,CRIP2,EDNRA,BGN,ITIH5,TGFB1I1,TMEM47,THY1,FSTL1,IGFBP5,CYR61,GLIS2,CYYR1,PARVA,MMRN2,ANTXR1,KDR,CTGF,SPARCL1,EML1,TAGLN,FERMT2,PCDH18,SDC2
Coexpression	20421987-TableS1	Human Lung_Hou10_1067genes	GeneSigDB	2.895e-28	1.945e-24	9.726e-25	9.132e-24	44	724	A2M,COL4A2,GPR4,RERG,FBLN5,RAMP2,VWF,RAMP3,RHOJ,LMCD1,PODXL,LRRC32,SOX17,PPP1R14A,ESAM,SEMA3G,ACVRL1,HSPA12B,TEK,EDNRA,LDB2,ITIH5,JAM2,FZD4,TMEM47,TIMP3,ADAMTS9,CLEC14A,PRELP,CYYR1,PRICKLE2,ARHGAP29,MMRN2,LHFPL6,LMOD1,KDR,CLDN5,SPARCL1,PLAC9,EML1,FERMT2,CDH5,RAI2,EMCN
Coexpression	M12225	Up-regulated genes in angioimmunoblastic lymphoma (AILT) compared to normal T lymphocytes.	MSigDB C2: CGP Curated Gene Sets (v6.0)	2.75e-26	1.848e-22	6.16e-23	5.784e-22	27	205	A2M,COL4A1,COL4A2,COL6A1,VWF,CALD1,RGS5,LAMA4,CCDC80,ACVRL1,SMOC2,NR2F2,MYL9,THY1,FSTL1,IGFBP5,ADAMTS9,TJP1,NFIB,PARVA,ARHGAP29,ANTXR1,SPARCL1,TAGLN,FERMT2,CDH5,EMCN
Coexpression	M17471	Genes up-regulated in invasive ductal carcinoma (IDC) relative to ductal carcinoma in situ (DCIS, non-invasive).	MSigDB C2: CGP Curated Gene Sets (v6.0)	6.161e-26	4.139e-22	1.035e-22	9.717e-22	32	351	COL4A1,COL4A2,COL6A1,HTRA1,CALD1,PDGFRB,LMCD1,EFEMP2,MXRA8,LAMA4,ISLR,OLFML3,EDNRA,LDB2,BGN,TGFB1I1,TMEM47,MYL9,THY1,FSTL1,CYR61,TIMP3,PARVA,LHFPL6,COL14A1,KDR,CTGF,SPARCL1,EML1,FERMT2,SDC2,RCAN2
Coexpression	18006812-TableS1	Human Lymphoma_Piccaluga07_260genes	GeneSigDB	5.861e-25	3.938e-21	7.875e-22	7.395e-21	26	204	A2M,COL4A1,COL4A2,COL6A1,VWF,CALD1,RGS5,LAMA4,CCDC80,ACVRL1,NR2F2,MYL9,THY1,FSTL1,IGFBP5,ADAMTS9,TJP1,NFIB,PARVA,ARHGAP29,ANTXR1,SPARCL1,TAGLN,FERMT2,CDH5,EMCN
Coexpression	16440291-SuppTable1	Human HeadandNeck_Martens06_209genes	GeneSigDB	7.59e-25	5.1e-21	8.5e-22	7.981e-21	26	206	A2M,COL4A1,COL4A2,VWF,CALD1,RGS5,ZNF423,LAMA4,NR2F2,LDB2,TMEM47,MYL9,IGFBP5,MGP,TIMP3,NFIB,ARHGAP29,LHFPL6,LMOD1,SGCE,CLDN5,SPARCL1,TAGLN,FERMT2,GNG11,CDH5
Coexpression	16498405-TableS3	Mouse Kidney_Takemoto06_388genes_cat1	GeneSigDB	9.759e-22	6.557e-18	9.367e-19	8.795e-18	27	302	FLT1,HTRA1,RAMP2,CALD1,LMCD1,PODXL,MYCT1,LRRC49,MXRA8,SOX17,ID3,LAMB2,CHST1,SEMA3G,ACVRL1,LDB2,SLC9A3R2,GJA5,IGFBP5,TIMP3,TJP1,MMRN2,KDR,CLDN5,EML1,NOS3,EMCN
Coexpression	M7501	Genes up-regulated in CD4 [GeneID=920] follicular helper T cells (Tfh) with SH2D1A [GeneID=4068] knockout versus wildtype Tfh cells.	MSigDB C7: Immunologic Signatures (v6.0)	8.009e-20	5.381e-16	6.726e-17	6.316e-16	22	200	COL4A1,COL4A2,GPR4,RHOJ,ESAM,LAMB2,SOX18,TEK,LDB2,BGN,SLC9A3R2,THY1,ECSCR,ARHGAP29,TLE6,LHFPL6,EXOC3L1,KDR,FGD5,FGFR1,GNG11,CDH5
Coexpression	M2573	Genes consistently up-regulated in mammary stem cells both in mouse and human species.	MSigDB C2: CGP Curated Gene Sets (v6.0)	2.176e-19	1.462e-15	1.625e-16	1.526e-15	30	489	COL4A1,COL4A2,HTRA1,CALD1,PAMR1,RHOJ,ZNF423,PPP1R14A,RASL12,JAM2,LIMS2,TGFB1I1,MSX1,PHLDB1,TMEM47,MYL9,THY1,TIMP3,WTIP,SLIT3,PRICKLE2,ANTXR1,LHFPL6,LMOD1,COL14A1,CTGF,TAGLN,FERMT2,GNG11,PCDH18
Coexpression	M7396	Genes down-regulated in the Kras2LA mouse lung cancer model with mutated KRAS [GeneID=3845].	MSigDB C2: CGP Curated Gene Sets (v6.0)	1.105e-18	7.427e-15	7.427e-16	6.974e-15	28	435	FLT1,RAMP2,VWF,RHOJ,PDGFRB,SOX17,ID3,CPE,ACVRL1,ARMCX2,TEK,NR2F2,BCL6B,MYL9,MGP,CYR61,TIMP3,TJP1,NFIB,KDR,CLDN5,SPARCL1,TAGLN,FERMT2,GNG11,CDH5,NOTCH4,EMCN
Coexpression Atlas	GSM777032_500	Stromal Cells, BEC.MLN, gp38- CD31+, Lymph Node, avg-5	Immgen.org, GSE15907	7.391e-69	2.487e-65	1.985e-65	1.727e-64	68	456	COL4A1,TSPAN15,COL4A2,FKBP10,FLT1,NPR1,FBLN5,RAMP2,VWF,PDGFB,RHOJ,DLL4,PODXL,MYCT1,LRRC32,PIK3R3,MXRA8,SOX17,APBB2,LAMA4,ID3,ESAM,LAMB2,SOX18,EBF1,SEMA3G,VWA1,ACVRL1,HSPA12B,TEK,NR2F2,ARHGEF15,CRIP2,LDB2,BGN,JAM2,CXorf36,LIMS2,FZD4,BCL6B,SLC9A3R2,GJA4,TMEM47,FBXL7,FSTL1,CYR61,TIMP3,ADAMTS9,USHBP1,TJP1,CLEC14A,ECSCR,NFIB,CYYR1,PARVA,ARHGAP29,MMRN2,KDR,CLDN5,FGD5,SPARCL1,BCAM,FERMT2,GNG11,CDH5,NOS3…
Coexpression Atlas	GSM777037_500	Stromal Cells, BEC.SLN, gp38- CD31+, Lymph Node, avg-4	Immgen.org, GSE15907	1.18e-68	3.971e-65	1.985e-65	1.727e-64	68	459	COL4A1,TSPAN15,COL4A2,FKBP10,FLT1,NPR1,FBLN5,RAMP2,VWF,PDGFB,RHOJ,DLL4,RGS5,PODXL,MYCT1,LRRC32,PIK3R3,MXRA8,SOX17,APBB2,LAMA4,ESAM,LAMB2,SOX18,EBF1,SEMA3G,VWA1,ACVRL1,HSPA12B,TEK,ARHGEF15,CRIP2,LDB2,BGN,ITIH5,JAM2,CXorf36,LIMS2,FZD4,BCL6B,SLC9A3R2,TMEM47,FSTL1,CYR61,TIMP3,ADAMTS9,USHBP1,TJP1,CLEC14A,ECSCR,NFIB,CYYR1,PARVA,ARHGAP29,MMRN2,KDR,CLDN5,CTGF,FGD5,SPARCL1,EML1,BCAM,FERMT2,GNG11,CDH5,CNN3…
Coexpression Atlas	GSM777067_500	Stromal Cells, St.31-38-44-.SLN, CD45- gp38- CD31- CD44-, Lymph Node, avg-2	Immgen.org, GSE15907	1.938e-64	6.523e-61	2.174e-61	1.891e-60	65	453	COL4A1,TSPAN15,COL4A2,FKBP10,COL6A1,RERG,FBLN5,HTRA1,CALD1,PAMR1,RHOJ,PDGFRB,RGS5,LRRC32,EFEMP2,MXRA8,APBB2,PPP1R14A,LAMA4,ID3,ESAM,LAMB2,CCDC80,CPE,RASL12,EBF1,ISLR,OLFML3,NR2F2,CRIP2,EDNRA,BGN,ITIH5,FZD4,GJA4,BMPR1A,TMEM47,KCNE4,MYL9,FSTL1,IGFBP5,MGP,CYR61,TIMP3,TJP1,NFIB,PRELP,SLIT3,PARVA,ARHGAP29,ANTXR1,LHFPL6,COL14A1,SGCE,CTGF,SPARCL1,ELN,PLAC9,BCAM,TAGLN,FERMT2,CDH5,PCDH18,SDC2,CNN3
Coexpression Atlas	gudmap_RNAseq_e15.5_Podocytes_2500	gudmap_RNAseq_e15.5_Podocytes_2500	Gudmap RNAseq	4.211e-50	1.417e-46	3.542e-47	3.081e-46	90	1863	COL4A1,THSD4,FOXS1,COL4A2,FKBP10,COL6A1,GPR4,FLT1,NPR1,HTRA1,RAMP2,REM1,VWF,RAMP3,PAMR1,PDGFB,RHOJ,PDGFRB,RGS5,LMCD1,PODXL,MYCT1,FAM110D,EFEMP2,PPP1R14A,LAMA4,ID3,ESAM,SOX18,CCDC80,CHST1,ISLR,SEMA3G,ACVRL1,SMOC2,HSPA12B,TEK,OLFML3,NR2F2,ARHGEF15,CRIP2,LDB2,BGN,ITIH5,CXorf36,LIMS2,TGFB1I1,FZD4,BCL6B,SLC9A3R2,TRIL,GJA5,KCNE4,FBXL7,MYL9,THY1,IGFBP5,MGP,TIMP3,ADAMTS9,USHBP1,CASKIN2,CLEC14A,ECSCR,NFIB…
Coexpression Atlas	GSM777043_500	Stromal Cells, Fi.MTS15+.Th, CD45- PDGFRa+ MTS15+, Thymus, avg-3	Immgen.org, GSE15907	7.574e-49	2.549e-45	5.097e-46	4.434e-45	54	445	COL4A1,TSPAN15,COL4A2,FKBP10,COL6A1,HTRA1,RAMP2,CALD1,PDGFRL,RHOJ,PDGFRB,RGS5,MXRA8,APBB2,LAMA4,ID3,LAMB2,CCDC80,CPE,EBF1,SMOC2,OLFML3,NR2F2,CRIP2,EDNRA,BGN,ITIH5,BMPR1A,TMEM47,KCNE4,THY1,FSTL1,IGFBP5,MGP,CYR61,TIMP3,ADAMTS9,TJP1,NFIB,PRELP,SLIT3,PARVA,ARHGAP29,ANTXR1,LHFPL6,COL14A1,SGCE,FGFR1,SPARCL1,PLAC9,FERMT2,CDH5,PCDH18,SDC2
Coexpression Atlas	GSM777046_500	Stromal Cells, Fi.Sk, gp38+ CD140a+, Skin, avg-4	Immgen.org, GSE15907	4.51e-45	1.517e-41	2.439e-42	2.122e-41	51	438	BOC,FKBP10,COL6A1,FBLN5,HTRA1,RAMP2,PAMR1,PDGFRL,RHOJ,PDGFRB,MXRA8,LAMA4,ID3,LAMB2,CCDC80,CPE,EBF1,ISLR,SMOC2,TEK,OLFML3,CRIP2,EDNRA,BGN,ITIH5,JAM2,FZD4,BMPR1A,TMEM47,THY1,FSTL1,IGFBP5,MGP,CYR61,TIMP3,NFIB,PRELP,SLIT3,PARVA,ARHGAP29,ANTXR1,LHFPL6,COL14A1,SGCE,FGFR1,SPARCL1,ELN,PLAC9,FERMT2,PCDH18,SDC2
Coexpression Atlas	GSM777059_500	Stromal Cells, LEC.MLN, gp38+ CD31+, Lymph Node, avg-4	Immgen.org, GSE15907	5.074e-45	1.707e-41	2.439e-42	2.122e-41	51	439	COL4A1,THSD4,TSPAN15,COL4A2,FKBP10,NPR1,FBLN5,RAMP2,PDGFB,RHOJ,DLL4,LMCD1,PODXL,MYCT1,LRRC32,LAMA4,SOX18,CPE,TEK,NR2F2,CRIP2,LDB2,BGN,FZD4,BCL6B,GJA4,FBXL7,THY1,FSTL1,IGFBP5,CYR61,TIMP3,ADAMTS9,TJP1,ECSCR,NFIB,PRELP,CYYR1,PARVA,ARHGAP29,MMRN2,LHFPL6,KDR,CLDN5,FGD5,ELN,PBX1,FERMT2,CDH5,NOS3,EMCN
Coexpression Atlas	GSM777055_500	Stromal Cells, FRC.SLN, gp38+ CD31- CD140a+, Lymph Node, avg-4	Immgen.org, GSE15907	3.217e-44	1.082e-40	1.353e-41	1.177e-40	51	455	COL4A1,COL4A2,FKBP10,COL6A1,FBLN5,HTRA1,RAMP2,CALD1,PAMR1,RHOJ,PDGFRB,RGS5,EFEMP2,MXRA8,LAMA4,ID3,LAMB2,CCDC80,EBF1,ISLR,OLFML3,NR2F2,CRIP2,BGN,ITIH5,BMPR1A,TMEM47,KCNE4,MYL9,FSTL1,IGFBP5,MGP,CYR61,TIMP3,TJP1,ECSCR,NFIB,PRELP,KCNJ8,SLIT3,PARVA,ARHGAP29,ANTXR1,LHFPL6,COL14A1,SGCE,SPARCL1,PLAC9,TAGLN,FERMT2,SDC2
Coexpression Atlas	GSM777050_500	Stromal Cells, FRC.MLN, gp38+ CD31- CD140a+, Lymph Node, avg-5	Immgen.org, GSE15907	5.352e-41	1.801e-37	2.001e-38	1.741e-37	49	467	COL4A1,BOC,COL4A2,FKBP10,COL6A1,FBLN5,HTRA1,RAMP2,PAMR1,PDGFRB,EFEMP2,MXRA8,LAMA4,ID3,LAMB2,CCDC80,EBF1,ISLR,OLFML3,NR2F2,CRIP2,BGN,ITIH5,FZD4,BMPR1A,KCNE4,MYL9,FSTL1,IGFBP5,MGP,CYR61,TIMP3,NFIB,PRELP,KCNJ8,SLIT3,PARVA,ARHGAP29,ANTXR1,LHFPL6,COL14A1,SGCE,FGFR1,SPARCL1,ELN,PLAC9,TAGLN,FERMT2,SDC2
Coexpression Atlas	GSM777063_500	Stromal Cells, LEC.SLN, gp38+ CD31+, Lymph Node, avg-4	Immgen.org, GSE15907	3.627e-39	1.221e-35	1.221e-36	1.062e-35	47	450	COL4A1,TSPAN15,FKBP10,NPR1,FBLN5,RAMP2,PDGFB,RHOJ,DLL4,LMCD1,PODXL,MYCT1,LRRC32,LAMA4,SOX18,CPE,TEK,NR2F2,CRIP2,LDB2,BGN,GJA4,FBXL7,FSTL1,IGFBP5,CYR61,TIMP3,ADAMTS9,TJP1,CLEC14A,ECSCR,NFIB,PRELP,PARVA,ARHGAP29,MMRN2,LHFPL6,KDR,CLDN5,FGD5,ELN,BCAM,FERMT2,CDH5,NOS3,CNN3,EMCN
Computational	M16395 MODULE_47	ECM and collagens.	MSigDb: C4 - CM: Cancer Modules (v6.0)	2.628e-28	7.778e-26	7.778e-26	4.876e-25	33	225	COL4A1,COL4A2,COL6A1,HTRA1,VWF,CALD1,PAMR1,PDGFRL,PDGFRB,RGS5,LMCD1,LRRC32,ID3,ISLR,TEK,EDNRA,LDB2,BGN,PHLDB1,TMEM47,MYL9,THY1,TIMP3,PRELP,FRZB,SGCE,CTGF,FGFR1,EML1,TAGLN,GNG11,CDH5,CNN3
Computational	M4051 MODULE_1	Ovary genes.	MSigDb: C4 - CM: Cancer Modules (v6.0)	2.312e-13	6.844e-11	3.422e-11	2.145e-10	25	368	COL4A1,MAGI1,COL6A1,VWF,CALD1,PDGFRL,PDGFRB,RGS5,WFS1,LAMB2,CPE,LDOC1,EDNRA,MSX1,TMEM47,FBXL7,MYL9,THY1,CYR61,LMOD1,SGCE,FGFR1,BCAM,GNG11,CNN3
Computational	M9982 MODULE_2	DRG (dorsal root ganglia) genes.	MSigDb: C4 - CM: Cancer Modules (v6.0)	4.541e-12	1.344e-09	4.48e-10	2.809e-09	24	384	COL4A1,COL6A1,RAMP2,VWF,PDGFRL,PDGFRB,RGS5,LAMA4,LAMB2,CPE,LDOC1,TMEM47,MYL9,THY1,CYR61,TIMP3,TLE2,SGCE,CLDN5,FGFR1,GNG11,CDH5,CNN3,RCAN2
Computational	M414 MODULE_122	Adhesion molecules.	MSigDb: C4 - CM: Cancer Modules (v6.0)	5.088e-10	1.506e-07	3.765e-08	2.36e-07	14	141	COL4A1,COL6A1,VWF,EFEMP2,LAMA4,LAMB2,ISLR,BGN,JAM2,MGP,PRELP,CTGF,ELN,CDH5
Computational	M7383 MODULE_5	Lung genes.	MSigDb: C4 - CM: Cancer Modules (v6.0)	2.208e-09	6.536e-07	1.307e-07	8.195e-07	22	434	COL4A1,MAGI1,COL6A1,RAMP2,VWF,CALD1,PDGFRB,RGS5,WFS1,LRRC32,LAMB2,TEK,LDB2,MYL9,CYR61,TIMP3,CLDN5,FGFR1,BCAM,GNG11,CDH5,CNN3
Computational	M16071 MODULE_38	Placenta genes.	MSigDb: C4 - CM: Cancer Modules (v6.0)	7.595e-09	2.248e-06	3.747e-07	2.349e-06	22	464	COL4A1,COL6A1,FLT1,RAMP2,VWF,PDGFB,PDGFRB,WFS1,LRRC32,LAMB2,MSX1,GJA4,MYL9,CYR61,TIMP3,TLE2,CLDN5,FGFR1,ELN,GNG11,CDH5,CNN3
Computational	M18929 MODULE_12	Spinal cord (neuro-development) genes.	MSigDb: C4 - CM: Cancer Modules (v6.0)	5.029e-07	0.0001489	2.127e-05	0.0001333	17	360	COL4A1,COL6A1,LAMB2,CPE,LDOC1,TMEM47,FBXL7,MYL9,CYR61,TIMP3,TLE2,SGCE,CLDN5,FGFR1,ELN,FERMT2,CNN3
Computational	M15763 MODULE_60	Heart genes.	MSigDb: C4 - CM: Cancer Modules (v6.0)	1.101e-06	0.0003258	4.072e-05	0.0002553	18	425	COL6A1,RAMP2,VWF,PDGFRB,WFS1,LRRC32,LAMB2,GJA4,MYL9,TIMP3,TJP1,TLE2,CLDN5,FGFR1,ELN,BCAM,PBX1,CDH5
Computational	M2667 MODULE_19	Adrenal gland - metabolic genes.	MSigDb: C4 - CM: Cancer Modules (v6.0)	2.183e-06	0.0006463	7.181e-05	0.0004502	15	314	COL4A1,COL6A1,PDGFRB,RGS5,LRRC32,LAMB2,CPE,LDOC1,FBXL7,MYL9,FSTL1,TIMP3,SGCE,PBX1,CNN3
Computational	M17118 MODULE_190	IGFBPs.	MSigDb: C4 - CM: Cancer Modules (v6.0)	7.033e-06	0.002082	0.0002082	0.001305	4	12	HTRA1,IGFBP5,CYR61,CTGF
Drug	D004237	Diuron	CTD	9.659e-26	1.912e-21	1.912e-21	2.002e-20	61	1722	COL4A1,COL4A2,COL6A1,FLT1,HTRA1,LARP6,CALD1,PDGFRL,RHOJ,RGS5,LMCD1,EFEMP2,MXRA8,APBB2,PPP1R14A,LAMA4,ID3,LAMB2,CCDC80,CPE,EBF1,ISLR,TEK,OLFML3,FGF18,NR2F2,JAM2,LIMS2,TGFB1I1,MSX1,MYL9,THY1,FSTL1,IGFBP5,MGP,CYR61,TIMP3,ADAMTS9,NFIB,PRELP,TLE2,KCNJ8,GLIS2,HSPB6,SLIT3,PARVA,LHFPL6,LMOD1,COL14A1,CTGF,FGFR1,SPARCL1,EML1,TAGLN,FERMT2,GNG11,CDH5,SDC2,CNN3,HYAL2,EMCN
Drug	C041786	palm oil	CTD	1.228e-17	2.43e-13	1.215e-13	1.272e-12	50	1675	FKBP10,COL6A1,RAMP2,VWF,PDGFRL,DLL4,RGS5,WFS1,PODXL,MYCT1,MXRA8,PPP1R14A,LAMA4,ID3,ESAM,SOX18,CCDC80,CHST1,ISLR,VWA1,SMOC2,ARMCX2,OLFML3,ARHGEF15,BGN,TGFB1I1,BCL6B,SLC9A3R2,GJA4,TMEM47,MYL9,FSTL1,CYR61,TJP1,PRELP,KCNJ8,FRZB,SLIT3,ANTXR1,KDR,CTGF,FGFR1,SPARCL1,ELN,EML1,BCAM,TAGLN,GNG11,CNN3,EMCN
Drug	D014050	Toluene	CTD	1.57e-14	3.108e-10	1.036e-10	1.085e-09	29	654	COL4A1,NPHP1,FLT1,VWF,CALD1,PDGFRB,RGS5,PODXL,SOX17,PPP1R14A,ESAM,SOX18,SEMA3G,ACVRL1,TEK,BCL6B,THY1,NFATC4,NFIB,KCNJ8,CYYR1,KDR,CLDN5,EGFLAM,FGD5,TAGLN,CDH5,NOS3,PCDH18
Drug	D015735	Mifepristone	CTD	4.388e-13	8.685e-09	2.171e-09	2.273e-08	25	538	FLT1,VWF,PAMR1,PDGFRB,LMCD1,PODXL,SOX17,CCDC80,CPE,CHST1,LDOC1,TEK,EDNRA,PGR,FZD4,FSTL1,IGFBP5,ADAMTS9,TJP1,SLIT3,KDR,CTGF,ELN,NOS3,NOTCH4
Drug	D003561	Cytarabine	CTD	6.533e-13	1.293e-08	2.586e-09	2.708e-08	26	598	MAGI1,RERG,HTRA1,PAMR1,PDGFRB,LMCD1,PODXL,ZNF423,LRRC32,EFEMP2,SMOC2,TEK,OLFML3,JAM2,MSX1,THY1,IGFBP5,MGP,TIMP3,ADAMTS9,NFIB,FRZB,LHFPL6,EGFLAM,PLAC9,TAGLN
Drug	C023035	3,4,5,3',4'-pentachlorobiphenyl	CTD	1.257e-11	2.488e-07	4.147e-08	4.342e-07	34	1174	A2M,NPHP1,FLT1,NPR1,FBLN5,CALD1,LMCD1,PODXL,PIK3R3,MXRA8,LAMB2,CCDC80,CRIP2,FZD4,TMEM47,MYL9,THY1,IGFBP5,MGP,CYR61,TIMP3,TJP1,PRELP,ARHGAP29,KDR,CTGF,FGD5,SPARCL1,BCAM,TAGLN,NOS3,SDC2,EPB41L1,RCAN2
Drug	D019808	Losartan	CTD	8.61e-11	1.704e-06	2.435e-07	2.549e-06	13	145	COL4A1,COL4A2,FLT1,NPR1,PDGFB,PDGFRB,EDNRA,MGP,TJP1,KDR,ELN,NOS3,SDC2
Drug	C007350	nitrofen	CTD	1.155e-10	2.285e-06	2.857e-07	2.991e-06	14	181	NPR1,PDGFB,PDGFRB,FGF18,NR2F2,EDNRA,TGFB1I1,IGFBP5,TIMP3,KCNJ8,SLIT3,CTGF,ELN,NOS3
Drug	CID000024766	chondroitin sulfate	Stitch	4.089e-10	8.093e-06	8.992e-07	9.415e-06	19	413	A2M,COL4A1,COL6A1,PDGFB,PDGFRB,LAMA4,LAMB2,CHST1,MFRP,FGF18,BGN,TIMP3,ADAMTS9,PRELP,COL14A1,ELN,SDC2,HYAL2,RAI2
Drug	CID000000772	LMWH	Stitch	1.329e-09	2.63e-05	2.63e-06	2.754e-05	23	663	A2M,COL4A1,BOC,COL6A1,FLT1,VWF,PDGFB,LAMA4,LAMB2,MFRP,FGF18,BGN,MYL9,IGFBP5,CYR61,COL14A1,KDR,CTGF,FGFR1,ELN,NOS3,SDC2,HYAL2
Disease	C1519670	Tumor Angiogenesis	DisGeNET BeFree	4.578e-11	1.402e-07	1.402e-07	1.206e-06	24	511	GPR4,FLT1,FBLN5,PCGF2,VWF,DLL4,RGS5,PIK3R3,SOX17,LAMA4,ACVRL1,TEK,NR2F2,BGN,FZD4,CYR61,TIMP3,ADAMTS9,SLIT3,ANTXR1,KDR,CTGF,FGFR1,NOS3
Disease	C0022658	Kidney Diseases	DisGeNET Curated	2.249e-09	6.886e-06	3.443e-06	2.962e-05	23	569	COL4A1,NPHP1,COL4A2,FLT1,NPR1,RAMP2,VWF,CALD1,WFS1,PODXL,ZNF423,LAMB2,EDNRA,BGN,THY1,TIMP3,GLIS2,KDR,CTGF,TAGLN,FERMT2,NOS3,SDC2
Disease	C1658953	tumor vasculature	DisGeNET BeFree	2.445e-08	7.487e-05	2.496e-05	0.0002147	11	127	FLT1,CALD1,DLL4,PDGFRB,TEK,CYR61,CLEC14A,ANTXR1,KDR,FGFR1,NOS3
Disease	C0042373	Vascular Diseases	DisGeNET Curated	2.845e-07	0.000871	0.0002178	0.001874	16	368	COL4A1,FBLN5,VWF,ACVRL1,EDNRA,BGN,MYL9,FSTL1,IGFBP5,MGP,CYR61,TIMP3,ANTXR1,KDR,ELN,NOS3
Disease	C0334533	Arteriovenous hemangioma	DisGeNET BeFree	4.064e-07	0.001244	0.0002489	0.002141	6	32	SOX17,ACVRL1,TEK,NR2F2,GJA5,MGP
Disease	C0002940	Aneurysm	DisGeNET Curated	1.1e-06	0.003368	0.0005317	0.004574	10	148	FBLN5,EFEMP2,SOX17,ACVRL1,BGN,TIMP3,TJP1,ELN,CDH5,NOS3
Disease	C0003850	Arteriosclerosis	DisGeNET Curated	1.359e-06	0.00416	0.0005317	0.004574	27	1067	FLT1,HTRA1,VWF,PDGFB,DLL4,ID3,SOX18,TEK,NR2F2,EDNRA,LDB2,BGN,TGFB1I1,GJA4,GJA5,MGP,CYR61,TIMP3,ECSCR,KDR,CTGF,FGFR1,OSCP1,ELN,TAGLN,NOS3,NOTCH4
Disease	C0003857	Congenital arteriovenous malformation	DisGeNET Curated	1.389e-06	0.004253	0.0005317	0.004574	7	61	SOX17,ACVRL1,TEK,NR2F2,EDNRA,GJA5,MGP
Disease	C0019284	Diaphragmatic Hernia	DisGeNET Curated	4.876e-06	0.01493	0.001659	0.01427	6	48	FGF18,NR2F2,EDNRA,SLIT3,ELN,NOS3
Disease	C0235833	Congenital diaphragmatic hernia	DisGeNET Curated	8.04e-06	0.02462	0.002347	0.02019	7	79	FBLN5,EFEMP2,TEK,FGF18,NR2F2,CTGF,ELN

## Sheet: Supplementary Table 4
Category	ID	Name	Source	p-value	q-value Bonferroni	q-value FDR B&H	q-value FDR B&Y	Hit Count in Query List	Hit Count in Genome	Hit in Query List
GO: Molecular Function	GO:0005216	ion channel activity		8.064e-28	1.035e-24	9.48e-25	7.332e-24	79	424	TTYH1,KCNH7,KCNIP2,KCNIP1,CACNG3,CACNG2,SLC24A4,SCN1A,SCN2A,SCN3A,SCNN1A,KCNT1,LRRC8E,APOL1,PEX5L,KCNK5,SNAP25,SCN3B,GABRA1,GABRA4,GABRA5,GABRB1,GABRG1,GABRG2,ANO9,FXYD7,FXYD6,HCN2,MLC1,ABCC8,GLRA2,DENND5A,CACNA1A,GPM6A,CACNA1E,HCN1,GRIA1,GRIA2,GRIA3,GRIA4,GRID1,GRID2,GRIK1,GRIK2,GRIK3,GRIK4,GRIK5,GRIN1,GRIN2C,IL1RAPL1,P2RX6,BEST3,CHRNA4,CHRNB2,CLCN6,NALCN,CLIC1,SLC24A2,TMEM109,CNGA3,KCNK4,KCNA1,…
GO: Molecular Function	GO:0022838	substrate-specific channel activity		1.478e-27	1.896e-24	9.48e-25	7.332e-24	80	438	TTYH1,KCNH7,KCNIP2,KCNIP1,CACNG3,CACNG2,SLC24A4,SCN1A,SCN2A,SCN3A,SCNN1A,KCNT1,LRRC8E,APOL1,PEX5L,AQP4,KCNK5,SNAP25,SCN3B,GABRA1,GABRA4,GABRA5,GABRB1,GABRG1,GABRG2,ANO9,FXYD7,FXYD6,HCN2,MLC1,ABCC8,GLRA2,DENND5A,CACNA1A,GPM6A,CACNA1E,HCN1,GRIA1,GRIA2,GRIA3,GRIA4,GRID1,GRID2,GRIK1,GRIK2,GRIK3,GRIK4,GRIK5,GRIN1,GRIN2C,IL1RAPL1,P2RX6,BEST3,CHRNA4,CHRNB2,CLCN6,NALCN,CLIC1,SLC24A2,TMEM109,CNGA3,KCNK4,K…
GO: Molecular Function	GO:0015267	channel activity		3.976e-26	5.101e-23	1.477e-23	1.143e-22	81	470	TTYH1,KCNH7,GJD2,KCNIP2,KCNIP1,CACNG3,CACNG2,SLC24A4,SCN1A,SCN2A,SCN3A,SCNN1A,KCNT1,LRRC8E,APOL1,PEX5L,AQP4,KCNK5,SNAP25,SCN3B,GABRA1,GABRA4,GABRA5,GABRB1,GABRG1,GABRG2,ANO9,FXYD7,FXYD6,HCN2,MLC1,ABCC8,GLRA2,DENND5A,CACNA1A,GPM6A,CACNA1E,HCN1,GRIA1,GRIA2,GRIA3,GRIA4,GRID1,GRID2,GRIK1,GRIK2,GRIK3,GRIK4,GRIK5,GRIN1,GRIN2C,IL1RAPL1,P2RX6,BEST3,CHRNA4,CHRNB2,CLCN6,NALCN,CLIC1,SLC24A2,TMEM109,CNGA3,KC…
GO: Molecular Function	GO:0022803	passive transmembrane transporter activity		4.606e-26	5.909e-23	1.477e-23	1.143e-22	81	471	TTYH1,KCNH7,GJD2,KCNIP2,KCNIP1,CACNG3,CACNG2,SLC24A4,SCN1A,SCN2A,SCN3A,SCNN1A,KCNT1,LRRC8E,APOL1,PEX5L,AQP4,KCNK5,SNAP25,SCN3B,GABRA1,GABRA4,GABRA5,GABRB1,GABRG1,GABRG2,ANO9,FXYD7,FXYD6,HCN2,MLC1,ABCC8,GLRA2,DENND5A,CACNA1A,GPM6A,CACNA1E,HCN1,GRIA1,GRIA2,GRIA3,GRIA4,GRID1,GRID2,GRIK1,GRIK2,GRIK3,GRIK4,GRIK5,GRIN1,GRIN2C,IL1RAPL1,P2RX6,BEST3,CHRNA4,CHRNB2,CLCN6,NALCN,CLIC1,SLC24A2,TMEM109,CNGA3,KC…
GO: Molecular Function	GO:0022836	gated channel activity		7.212e-26	9.252e-23	1.85e-23	1.431e-22	67	331	KCNH7,KCNIP2,KCNIP1,CACNG3,CACNG2,SCN1A,SCN2A,SCN3A,SCNN1A,KCNT1,PEX5L,KCNK5,SNAP25,SCN3B,GABRA1,GABRA4,GABRA5,GABRB1,GABRG1,GABRG2,ANO9,HCN2,ABCC8,GLRA2,CACNA1A,CACNA1E,HCN1,GRIA1,GRIA2,GRIA3,GRIA4,GRID1,GRID2,GRIK1,GRIK2,GRIK3,GRIK4,GRIK5,GRIN1,GRIN2C,IL1RAPL1,P2RX6,CHRNA4,CHRNB2,CLCN6,NALCN,CLIC1,TMEM109,CNGA3,KCNK4,KCNA1,KCNA2,KCNA6,KCNB1,KCNC1,KCND2,KCNF1,KCNJ4,KCNJ9,KCNJ10,KCNN1,SLC17A7,KCN…
GO: Molecular Function	GO:0015075	ion transmembrane transporter activity		2.552e-22	3.275e-19	5.458e-20	4.222e-19	108	873	TTYH1,KCNH7,SLC10A3,KCNIP2,KCNIP1,SLC22A17,SLC12A5,CACNG3,CACNG2,SLC24A4,SCN1A,SCN2A,SCN3A,SCNN1A,KCNT1,SLC9A6,LRRC8E,APOL1,PEX5L,SLC1A2,SLC1A3,SLC7A14,SLC6A1,SLC8A2,SLC8A3,SLCO1A2,KCNK5,SLC17A8,SNAP25,ATP1A2,ATP1A3,ATP1B2,ATP2B2,ATP2B3,SCN3B,GABRA1,GABRA4,GABRA5,GABRB1,GABRG1,GABRG2,ANO9,ATP6V1G2,FXYD7,FXYD6,HCN2,CEACAM1,SLCO1C1,MLC1,ABCC8,GLRA2,DENND5A,CACNA1A,GPM6A,CACNA1E,HCN1,GRIA1,GRIA2,GRI…
GO: Molecular Function	GO:0022891	substrate-specific transmembrane transporter activity		1.354e-20	1.737e-17	2.481e-18	1.919e-17	110	946	TTYH1,KCNH7,SLC10A3,KCNIP2,KCNIP1,SLC22A17,SLC12A5,CACNG3,CACNG2,SLC24A4,SCN1A,SCN2A,SCN3A,SCNN1A,SVOP,KCNT1,SLC9A6,LRRC8E,APOL1,PEX5L,AQP4,SLC1A2,SLC1A3,SLC7A14,SLC6A1,SLC8A2,SLC8A3,SLCO1A2,KCNK5,SLC17A8,SNAP25,ATP1A2,ATP1A3,ATP1B2,ATP2B2,ATP2B3,SCN3B,GABRA1,GABRA4,GABRA5,GABRB1,GABRG1,GABRG2,ANO9,ATP6V1G2,FXYD7,FXYD6,HCN2,CEACAM1,SLCO1C1,MLC1,ABCC8,GLRA2,DENND5A,CACNA1A,GPM6A,CACNA1E,HCN1,GRIA1…
GO: Molecular Function	GO:0022857	transmembrane transporter activity		1.082e-19	1.388e-16	1.735e-17	1.342e-16	113	1014	TTYH1,KCNH7,GJD2,SLC10A3,KCNIP2,KCNIP1,SLC22A17,SLC12A5,CACNG3,CACNG2,SLC24A4,SCN1A,SCN2A,SCN3A,SCNN1A,SVOP,KCNT1,SLC9A6,LRRC8E,APOL1,PEX5L,AQP4,SLC1A2,SLC1A3,SLC7A14,SLC6A1,SLC8A2,SLC8A3,SLCO1A2,KCNK5,SLC17A8,SNAP25,ATP1A2,ATP1A3,ATP1B2,ATP2B2,ATP2B3,SCN3B,GABRA1,GABRA4,GABRA5,GABRB1,GABRG1,GABRG2,ANO9,ATP6V1G2,FXYD7,FXYD6,HCN2,CEACAM1,SLCO1C1,MLC1,ABCC8,GLRA2,DENND5A,CACNA1A,GPM6A,CACNA1E,HCN1,…
GO: Molecular Function	GO:0022834	ligand-gated channel activity		3.904e-17	5.009e-14	5.009e-15	3.874e-14	36	148	KCNH7,SCNN1A,PEX5L,GABRA1,GABRA4,GABRA5,GABRB1,GABRG1,GABRG2,HCN2,ABCC8,GLRA2,HCN1,GRIA1,GRIA2,GRIA3,GRIA4,GRID1,GRID2,GRIK1,GRIK2,GRIK3,GRIK4,GRIK5,GRIN1,GRIN2C,P2RX6,CHRNA4,CHRNB2,CNGA3,KCNJ4,KCNJ9,KCNJ10,SLC17A7,DLG4,JPH3
GO: Molecular Function	GO:0015276	ligand-gated ion channel activity		3.904e-17	5.009e-14	5.009e-15	3.874e-14	36	148	KCNH7,SCNN1A,PEX5L,GABRA1,GABRA4,GABRA5,GABRB1,GABRG1,GABRG2,HCN2,ABCC8,GLRA2,HCN1,GRIA1,GRIA2,GRIA3,GRIA4,GRID1,GRID2,GRIK1,GRIK2,GRIK3,GRIK4,GRIK5,GRIN1,GRIN2C,P2RX6,CHRNA4,CHRNB2,CNGA3,KCNJ4,KCNJ9,KCNJ10,SLC17A7,DLG4,JPH3
GO: Biological Process	GO:0099536	synaptic signaling		8.681e-55	4.783e-51	1.375e-51	1.264e-50	141	687	GJD2,SYN3,MAPT,MBP,RTN3,KCNIP2,STX1B,SLC12A5,CACNG3,CACNG2,S100B,LRFN2,NLGN2,AMPH,SYT3,PPFIA2,CNIH2,APBA2,BCAN,SLC1A2,SLC1A3,RPH3A,SLC6A1,RGS14,SLC8A2,SLC8A3,NAPB,CADPS,CSPG5,SORCS3,SNAP25,SNCB,ATP1A2,BRSK1,ATP2B2,UNC13A,GABBR1,GABRA1,GABRA4,GABRA5,GABRG1,GABRG2,GAD1,GAD2,JPH4,KIF1B,CPLX2,NCAM1,GFAP,NCDN,SYNGAP1,CDK5R1,NEUROD2,STX3,SYT11,GLRA2,VAMP2,ARC,SYN1,SYN2,SYP,SYT4,SYT5,BSN,CNTN2,NOVA1,CAC…
GO: Biological Process	GO:0098916	anterograde trans-synaptic signaling		9.981e-55	5.499e-51	1.375e-51	1.264e-50	140	678	GJD2,SYN3,MAPT,MBP,RTN3,KCNIP2,STX1B,SLC12A5,CACNG3,CACNG2,S100B,LRFN2,NLGN2,AMPH,SYT3,PPFIA2,CNIH2,APBA2,BCAN,SLC1A2,SLC1A3,RPH3A,SLC6A1,RGS14,SLC8A2,SLC8A3,NAPB,CADPS,CSPG5,SORCS3,SNAP25,SNCB,ATP1A2,BRSK1,ATP2B2,UNC13A,GABBR1,GABRA1,GABRA4,GABRA5,GABRG1,GABRG2,GAD1,GAD2,JPH4,KIF1B,CPLX2,NCAM1,GFAP,NCDN,SYNGAP1,NEUROD2,STX3,SYT11,GLRA2,VAMP2,ARC,SYN1,SYN2,SYP,SYT4,SYT5,BSN,CNTN2,NOVA1,CACNA1A,GP…
GO: Biological Process	GO:0099537	trans-synaptic signaling		9.981e-55	5.499e-51	1.375e-51	1.264e-50	140	678	GJD2,SYN3,MAPT,MBP,RTN3,KCNIP2,STX1B,SLC12A5,CACNG3,CACNG2,S100B,LRFN2,NLGN2,AMPH,SYT3,PPFIA2,CNIH2,APBA2,BCAN,SLC1A2,SLC1A3,RPH3A,SLC6A1,RGS14,SLC8A2,SLC8A3,NAPB,CADPS,CSPG5,SORCS3,SNAP25,SNCB,ATP1A2,BRSK1,ATP2B2,UNC13A,GABBR1,GABRA1,GABRA4,GABRA5,GABRG1,GABRG2,GAD1,GAD2,JPH4,KIF1B,CPLX2,NCAM1,GFAP,NCDN,SYNGAP1,NEUROD2,STX3,SYT11,GLRA2,VAMP2,ARC,SYN1,SYN2,SYP,SYT4,SYT5,BSN,CNTN2,NOVA1,CACNA1A,GP…
GO: Biological Process	GO:0007268	chemical synaptic transmission		9.981e-55	5.499e-51	1.375e-51	1.264e-50	140	678	GJD2,SYN3,MAPT,MBP,RTN3,KCNIP2,STX1B,SLC12A5,CACNG3,CACNG2,S100B,LRFN2,NLGN2,AMPH,SYT3,PPFIA2,CNIH2,APBA2,BCAN,SLC1A2,SLC1A3,RPH3A,SLC6A1,RGS14,SLC8A2,SLC8A3,NAPB,CADPS,CSPG5,SORCS3,SNAP25,SNCB,ATP1A2,BRSK1,ATP2B2,UNC13A,GABBR1,GABRA1,GABRA4,GABRA5,GABRG1,GABRG2,GAD1,GAD2,JPH4,KIF1B,CPLX2,NCAM1,GFAP,NCDN,SYNGAP1,NEUROD2,STX3,SYT11,GLRA2,VAMP2,ARC,SYN1,SYN2,SYP,SYT4,SYT5,BSN,CNTN2,NOVA1,CACNA1A,GP…
GO: Biological Process	GO:0048699	generation of neurons		4.116e-42	2.267e-38	4.535e-39	4.168e-38	194	1528	MAG,MAP1B,MAP2,MAP6,MAPT,MBP,ETV1,MCF2,CEND1,SOX8,KCNIP2,RTN1,DSCAML1,SLITRK1,SLC12A5,S100B,LRFN2,NLGN2,SLC9A6,FOXG1,SEMA3F,GSX1,SYT3,CNTNAP1,APBB1,APC,DPYSL4,SLITRK3,LRRC4C,CPNE5,SLC1A3,RUFY3,ARF6,SPTBN4,LRRC55,RGS14,SIRT2,MT3,TRIM67,ASCL1,SLIT1,DLL3,ASTN1,SNAP25,TBR1,BRSK1,FYN,FAIM2,ATP2B2,UNC13A,MYO16,GABRA5,GABRB1,SOX1,SOX3,SOX11,NKX6-2,SALL3,GAP43,SPINT1,DNER,NCAM1,CLASP2,GDI1,GFAP,NCDN,SYNG…
GO: Biological Process	GO:0022008	neurogenesis		2.356e-41	1.298e-37	2.164e-38	1.989e-37	200	1628	MAG,MAP1B,MAP2,MAP6,MAPT,MBP,ETV1,MCF2,CEND1,SOX8,KCNIP2,RTN1,DSCAML1,SLITRK1,SLC12A5,FABP7,S100B,LRFN2,NLGN2,SLC9A6,FOXG1,SEMA3F,GSX1,SYT3,CNTNAP1,APBB1,APC,DPYSL4,SLITRK3,LRRC4C,CPNE5,SLC1A3,RUFY3,ARF6,SPTBN4,LRRC55,RGS14,SLC8A3,SIRT2,MT3,TRIM67,ASCL1,SLIT1,DLL3,ASTN1,SNAP25,TBR1,BRSK1,FYN,FAIM2,ATP2B2,UNC13A,MYO16,GABRA5,GABRB1,SOX1,SOX3,SOX11,NKX6-2,SALL3,GAP43,SPINT1,WASF3,DNER,NCAM1,CLASP2,…
GO: Biological Process	GO:0007267	cell-cell signaling		2.705e-38	1.49e-34	2.129e-35	1.957e-34	165	1233	GJD2,SYN3,MAPT,MBP,RTN3,KCNIP2,STX1B,SLC12A5,CACNG3,CACNG2,S100B,LRFN2,NLGN2,AMPH,ANK2,SYT3,PPFIA2,CNIH2,APBA2,BCAN,RAB11FIP1,PEX5L,SLC1A2,SLC1A3,RPH3A,SLC6A1,RGS14,SLC8A2,SLC8A3,NAPB,CADPS,CSPG5,SORCS3,SNAP25,SNCB,ATP1A2,BRSK1,VAMP8,ATP2B2,UNC13A,GABBR1,SCN3B,GABRA1,GABRA4,GABRA5,GABRG1,GABRG2,ILDR2,SOX11,GAD1,GAD2,JPH4,GALR1,TNFSF10,MYT1,KIF1B,SRI,CPLX2,NCAM1,NDP,HCN2,GFAP,NCDN,SYNGAP1,CDK5R1,N…
GO: Biological Process	GO:0030182	neuron differentiation		5.594e-38	3.082e-34	3.852e-35	3.541e-34	177	1398	MAG,MAP1B,MAP2,MAP6,MAPT,MBP,ETV1,MCF2,CEND1,SOX8,KCNIP2,RTN1,DSCAML1,SLITRK1,SLC12A5,S100B,LRFN2,NLGN2,SLC9A6,FOXG1,SEMA3F,GSX1,SYT3,CNTNAP1,APBB1,APC,DPYSL4,SLITRK3,LRRC4C,CPNE5,SLC1A3,RUFY3,ARF6,SPTBN4,LRRC55,MT3,TRIM67,ASCL1,SLIT1,SNAP25,TBR1,BRSK1,FYN,FAIM2,ATP2B2,UNC13A,MYO16,GABRA5,GABRB1,SOX1,SOX3,SOX11,NKX6-2,SALL3,GAP43,NCAM1,CLASP2,GDI1,GFAP,NCDN,SYNGAP1,C1QL1,KIRREL3,CDK5R1,NTNG2,SLIT…
GO: Biological Process	GO:0048666	neuron development		6.537e-38	3.601e-34	4.001e-35	3.678e-34	155	1114	MAG,MAP1B,MAP2,MAP6,MAPT,MBP,ETV1,MCF2,KCNIP2,DSCAML1,SLITRK1,SLC12A5,S100B,LRFN2,NLGN2,SLC9A6,FOXG1,SEMA3F,SYT3,CNTNAP1,APBB1,APC,DPYSL4,SLITRK3,LRRC4C,CPNE5,SLC1A3,RUFY3,ARF6,SPTBN4,LRRC55,MT3,TRIM67,ASCL1,SLIT1,SNAP25,TBR1,BRSK1,FYN,ATP2B2,UNC13A,MYO16,GABRA5,GABRB1,SOX1,SOX3,SALL3,GAP43,NCAM1,CLASP2,GDI1,GFAP,NCDN,SYNGAP1,C1QL1,KIRREL3,CDK5R1,NTNG2,SLITRK2,NEUROD1,NEUROD2,STX3,SYT4,DCLK2,GNAO…
GO: Biological Process	GO:0050804	modulation of chemical synaptic transmission		2.465e-31	1.358e-27	1.358e-28	1.248e-27	77	357	SYN3,MAPT,STX1B,CACNG3,CACNG2,S100B,NLGN2,CNIH2,BCAN,SLC1A3,SLC6A1,RGS14,SLC8A2,SLC8A3,NAPB,CSPG5,SORCS3,SNAP25,ATP1A2,ATP2B2,UNC13A,GABBR1,JPH4,CPLX2,NCAM1,GFAP,NCDN,SYNGAP1,NEUROD2,STX3,SYT11,VAMP2,ARC,SYN1,SYP,CNTN2,CACNA1A,GPM6B,CAMK2A,GRIA1,GRIA2,GRIA4,GRIK1,GRIK2,GRIK3,GRIK5,GRIN1,GRM1,GRM3,GRM5,SHISA7,OPHN1,PTPN5,NR2E1,GSG1L,TNR,LGI1,CHRNA4,CHRNB2,NLGN3,NRXN1,SLC24A2,CNR1,CELSR1,LRRTM2,CNT…
GO: Cellular Component	GO:0097458	neuron part		1.149e-78	7.436e-76	7.436e-76	5.243e-75	250	1545	DPF1,MAG,TTYH1,SYN3,MAP1A,MAP1B,MAP2,MAPT,MBP,ACTN2,KCNIP1,NDRG2,ADCY2,STX1B,ADCYAP1R1,GPR179,ADD2,SLC12A5,FABP7,ERMN,S100A4,S100B,SCAMP5,SCN1A,SCN2A,SCN3A,NLGN2,ACTL6B,ALDOC,SVOP,SLC9A6,AMPH,PSD2,ANK2,SYT3,PPFIA2,CNIH2,CNTNAP1,APBA2,APBB1,APC,CNKSR2,BCAN,CPNE5,PEX5L,SLC1A2,SLC1A3,RPH3A,RUFY3,SLC6A1,SPTBN4,RGS14,SLC8A2,SLC8A3,SIRT2,MT3,CADPS,ASCL1,SLC17A8,SORCS3,SNAP25,SNCB,TBR1,ATP1A2,ATP1A3,BRS…
GO: Cellular Component	GO:0043005	neuron projection		1.826e-68	1.182e-65	5.909e-66	4.166e-65	206	1194	MAG,TTYH1,MAP1B,MAP2,MAPT,MBP,ACTN2,KCNIP1,NDRG2,ADCY2,ADCYAP1R1,GPR179,SLC12A5,ERMN,S100A4,SCN1A,SCN2A,SCN3A,NLGN2,ALDOC,SLC9A6,AMPH,PSD2,ANK2,CNIH2,CNTNAP1,APBB1,APC,CNKSR2,BCAN,CPNE5,PEX5L,SLC1A2,SLC1A3,RPH3A,RUFY3,SLC6A1,SPTBN4,RGS14,SLC8A2,SLC8A3,SIRT2,MT3,SLC17A8,SNAP25,SNCB,ATP1A2,ATP1A3,ATP2B2,UNC13A,GABBR1,GABRA5,GABRB1,GABRG2,GAD1,GAD2,JPH4,KIF1A,GAP43,KIF1B,SRI,CPLX2,DNER,DDN,NCAM1,NCA…
GO: Cellular Component	GO:0045202	synapse		2.39e-66	1.546e-63	5.154e-64	3.633e-63	173	870	SYN3,MAP1A,MAP1B,MAP2,MAPT,ACTN2,DSCAML1,STX1B,ADD2,LRFN2,SCAMP5,LRRTM4,NLGN2,SVOP,SLC9A6,AMPH,ANK2,SYT3,PPFIA2,CNIH2,APBA2,APBB1,APC,CNKSR2,BCAN,LRRC4C,SLC1A2,SLC1A3,RPH3A,RGS14,SLC8A2,SLC8A3,MT3,CADPS,SLC17A8,SORCS3,SNAP25,SNCB,ATP1A2,ATP1A3,BRSK1,FYN,FAIM2,ATP2B2,UNC13A,GABBR1,GABRA1,GABRA4,GABRA5,GABRB1,GABRG1,GABRG2,GAD1,GAD2,MYH9,ATP6V1G2,GAP43,SRI,CPLX2,DDN,HCN2,SYNGAP1,C1QL1,CDK5R1,STX3,S…
GO: Cellular Component	GO:0044456	synapse part		1.807e-58	1.169e-55	2.922e-56	2.06e-55	147	708	SYN3,MAP1A,MAP1B,MAP2,MAPT,ACTN2,STX1B,ADD2,LRFN2,SCAMP5,LRRTM4,NLGN2,SVOP,AMPH,ANK2,SYT3,PPFIA2,CNIH2,APBA2,APBB1,CNKSR2,LRRC4C,SLC1A2,SLC1A3,RPH3A,RGS14,SLC8A2,SLC8A3,MT3,CADPS,SLC17A8,SORCS3,SNAP25,SNCB,ATP1A2,ATP1A3,BRSK1,FYN,FAIM2,UNC13A,GABBR1,GABRA1,GABRA4,GABRA5,GABRB1,GABRG1,GABRG2,GAD1,GAD2,ATP6V1G2,GAP43,SRI,CPLX2,DDN,SYNGAP1,C1QL1,CDK5R1,STX3,SYT11,ABCC8,GLRA2,VAMP2,ARC,SYN1,SYN2,SYP,…
GO: Cellular Component	GO:0036477	somatodendritic compartment		7.217e-55	4.67e-52	9.339e-53	6.585e-52	158	867	MAP1B,MAP2,MAPT,MBP,ACTN2,KCNIP1,ADCY2,GPR179,SLC12A5,FABP7,ERMN,S100B,SCN1A,SCN3A,NLGN2,SLC9A6,PSD2,CNIH2,APBB1,APC,CNKSR2,BCAN,CPNE5,PEX5L,SLC1A2,SLC1A3,RUFY3,SPTBN4,RGS14,SLC8A2,SLC8A3,SIRT2,MT3,ASCL1,SLC17A8,SNAP25,SNCB,ATP1A2,ATP1A3,ATP2B2,GABBR1,GABRA5,GABRB1,JPH4,KIF1A,SRI,CPLX2,DNER,DDN,NCAM1,HCN2,NCDN,SYNGAP1,KIRREL3,CDK5R1,STX3,SYT11,ARC,SYN1,SYT5,GNAO1,GNAZ,BSN,GNG3,CNTN2,CACNA1A,GPM6A…
GO: Cellular Component	GO:0030424	axon		1.466e-47	9.486e-45	1.581e-45	1.115e-44	119	567	MAG,TTYH1,MAP1B,MAPT,MBP,ERMN,SCN1A,SCN2A,SCN3A,ALDOC,SLC9A6,AMPH,CNTNAP1,APBB1,APC,SLC1A2,RUFY3,SLC6A1,SPTBN4,SIRT2,MT3,SLC17A8,SNAP25,SNCB,ATP1A3,UNC13A,GABBR1,GABRG2,GAD1,GAD2,KIF1A,GAP43,KIF1B,SRI,CPLX2,NCAM1,NCAM2,CLASP2,HCN2,NCDN,C1QL1,KIRREL3,CDK5R1,NTNG2,STX3,SYT11,VAMP2,SYN1,SYN2,SYP,BSN,CNTN2,GPM6A,NRCAM,CAMK2A,HCN1,STMN2,GRIA1,GRIA2,GRIA3,GRIA4,GRIK1,GRIK2,GRIK3,GRIK4,GRIK5,GRIN1,GRM1,…
GO: Cellular Component	GO:0030425	dendrite		1.878e-46	1.215e-43	1.736e-44	1.224e-43	120	590	MAP1B,MAP2,MAPT,ACTN2,KCNIP1,ADCY2,GPR179,SLC12A5,NLGN2,SLC9A6,PSD2,CNIH2,APBB1,APC,BCAN,PEX5L,SLC1A2,SLC1A3,RUFY3,RGS14,SLC8A2,SLC8A3,MT3,SLC17A8,ATP1A2,ATP1A3,ATP2B2,GABBR1,GABRA5,GABRB1,JPH4,SRI,CPLX2,DNER,DDN,HCN2,NCDN,SYNGAP1,KIRREL3,CDK5R1,STX3,SYT11,ARC,SYN1,GNAO1,GNAZ,BSN,GNG3,CACNA1A,GPM6A,CAMK2A,HCN1,GRIA1,GRIA2,GRIA3,GRIA4,GRID2,GRIK1,GRIK2,GRIK3,GRIK4,GRIK5,GRIN1,GRM1,GRM3,GRM5,CCK,OP…
GO: Cellular Component	GO:0044463	cell projection part		1.636e-41	1.059e-38	1.323e-39	9.33e-39	162	1139	MAG,TTYH1,SYN3,MAP1A,MAP1B,MAP2,MAPT,APC2,MBP,ACTN2,NDRG2,GPR179,ADD2,SLC12A5,ERMN,SCN1A,SCN2A,SCNN1A,NLGN2,SLC9A6,AMPH,CNIH2,CNTNAP1,APBB1,APC,CNKSR2,AQP4,SLC1A2,SLC1A3,RUFY3,ARF6,SPTBN4,RGS14,SLC8A2,SLC8A3,SIRT2,MT3,SLCO1A2,SLC17A8,SORCS3,SNAP25,SNCB,ATP1A2,ATP1A3,UNC13A,GABBR1,GABRG2,GAD1,ENKUR,JPH4,MYO1C,KIF1A,GAP43,KIF1B,SRI,CPLX2,DDN,BBS2,NCAM1,CLASP2,HCN2,CEACAM1,B4GALT1,SYNGAP1,KIRREL3,CD…
GO: Cellular Component	GO:0098794	postsynapse		7.803e-40	5.049e-37	5.61e-38	3.955e-37	97	449	SYN3,MAP1A,MAP1B,MAP2,MAPT,ACTN2,ADD2,LRFN2,LRRTM4,NLGN2,ANK2,CNIH2,APBB1,CNKSR2,LRRC4C,SLC1A2,SLC1A3,RGS14,SLC8A2,SLC8A3,MT3,SORCS3,ATP1A2,ATP1A3,FYN,FAIM2,GABBR1,GABRA1,GABRA4,GABRA5,GABRB1,GABRG1,GABRG2,GAP43,SRI,SYNGAP1,CDK5R1,SYT11,GLRA2,ARC,SYN1,SYN2,BSN,GNG3,GPM6A,CAMK2A,GRIA1,GRIA2,GRIA3,GRIA4,GRID1,GRID2,GRIK1,GRIK2,GRIK3,GRIK4,GRIK5,GRIN1,GRIN2C,GRM1,GRM3,GRM5,OPHN1,IL1RAPL1,P2RX6,PCDH8…
GO: Cellular Component	GO:0030054	cell junction		3.452e-39	2.233e-36	2.233e-37	1.574e-36	163	1200	GJD2,SYN3,MAP1B,EVPL,CD46,ACTN2,DSCAML1,ADCYAP1R1,FABP7,LRFN2,SCAMP5,SCN1A,SCN2A,LRRTM4,CRB3,NLGN2,SVOP,SDC1,AMPH,ANK2,ANXA2,CNIH2,APC,LRRC4C,AQP4,RPH3A,RUFY3,ARF6,SPTBN4,RGS14,SLC8A3,SIRT2,CADPS,SKAP1,CTNNA3,SLC17A8,SNAP25,ATP1A2,BRSK1,FAIM2,ATP2B2,UNC13A,GABBR1,GABRA1,GABRA4,GABRA5,GABRB1,GABRG1,GABRG2,CADM3,GAD2,MYH9,GAP43,NCAM1,CLASP2,CEACAM1,B4GALT1,SYNGAP1,STX3,SYT11,MLC1,GLRA2,SVIL,VAMP2,V…
Human Phenotype	HP:0200134	Epileptic encephalopathy		2.863e-10	6.894e-07	6.894e-07	5.766e-06	18	66	SCN1A,SCN2A,KCNT1,SLC1A2,SLC6A1,GABRA1,GABRB1,GABRG2,SYNGAP1,ARHGEF9,GNAO1,CACNA1A,HCN1,NRXN1,KCNA2,KCNB1,KCNQ2,AP3B2
Human Phenotype	HP:0100022	Abnormality of movement		6.627e-06	0.01596	0.005694	0.04763	16	99	MAPT,SCN1A,MOBP,FOXG1,MOG,SLCO1A2,SNCB,ATP1A2,KIF1A,CACNA1A,NTRK3,PAX6,CHN1,KCNA1,RAB39B,PRRT2
Human Phenotype	HP:0007334	Generalized tonic-clonic seizures with focal onset		7.094e-06	0.01708	0.005694	0.04763	7	18	SLC12A5,SCN1A,SCN2A,GABRA1,GABRG2,LGI1,KCNQ2
Human Phenotype	HP:0002121	Absence seizures		1.713e-05	0.04125	0.009257	0.07742	11	53	STX1B,SLC12A5,SCN1A,SCN2A,SLC6A1,GABRA1,GABRG2,GDI1,NFKB2,KCNQ2,PRRT2
Human Phenotype	HP:0006813	Hemiclonic seizures		1.922e-05	0.04628	0.009257	0.07742	5	9	SLC12A5,SCN1A,SCN2A,GABRA1,GABRG2
Human Phenotype	HP:0002266	Focal clonic seizures		3.704e-05	0.08919	0.01274	0.1066	5	10	SCN1A,SCN2A,GABRA1,GABRG2,KCNQ2
Human Phenotype	HP:0002131	Episodic ataxia		3.704e-05	0.08919	0.01274	0.1066	5	10	SLC1A3,ATP1A2,ATP1A3,CACNA1A,KCNA1
Mouse Phenotype	MP:0003635	abnormal synaptic transmission		8.653e-58	3.953e-54	3.953e-54	3.56e-53	168	742	MAG,GJD2,SYN3,MAP6,MAPT,MBP,DSCAML1,ADCY8,STX1B,ADCYAP1R1,ADD2,SLC12A5,FABP7,CACNG3,CACNG2,LRFN2,SCN1A,LRRTM4,NLGN2,ELMOD1,KCNT1,PPFIA2,CNIH2,SH3GL2,SH3GL3,APBA2,DPYSL4,SLITRK3,BCAN,SLC1A3,SLC6A1,RGS14,SLC8A2,SLC8A3,NAPB,CADPS,CSPG5,SLC17A8,SORCS3,B3GAT1,SNAP25,ATP1A2,ATP1A3,FYN,NEUROD6,ATP2B2,UNC13A,GABBR1,GABRA1,GABRA4,GABRA5,GABRB1,GABRG2,GAD1,GAD2,JPH4,ARPP21,GALR1,CPLX2,DNER,NPAS3,NCAM1,HCN2…
Mouse Phenotype	MP:0002206	abnormal CNS synaptic transmission		4.304e-55	1.967e-51	9.833e-52	8.854e-51	154	652	MAG,GJD2,SYN3,MAP6,MAPT,MBP,DSCAML1,ADCY8,STX1B,ADCYAP1R1,ADD2,SLC12A5,FABP7,CACNG3,CACNG2,LRFN2,SCN1A,LRRTM4,NLGN2,ELMOD1,PPFIA2,CNIH2,SH3GL2,SH3GL3,APBA2,DPYSL4,SLITRK3,BCAN,SLC1A3,SLC6A1,RGS14,SLC8A2,NAPB,CADPS,CSPG5,SORCS3,B3GAT1,SNAP25,ATP1A3,FYN,NEUROD6,ATP2B2,UNC13A,GABBR1,GABRA1,GABRA4,GABRA5,GABRB1,GABRG2,GAD1,GAD2,JPH4,GALR1,CPLX2,DNER,NPAS3,NCAM1,GDI1,GFAP,NCDN,SYNGAP1,C1QL1,CDK5R1,GLR…
Mouse Phenotype	MP:0003633	abnormal nervous system physiology		1.835e-53	8.385e-50	2.795e-50	2.517e-49	273	1925	MAG,GJD2,SYN3,MAP1B,MAP6,MAPT,APC2,MBP,ETV1,CEND1,KCNIP1,NDRG2,DSCAML1,SLITRK1,ADCY8,STX1B,ADCYAP1R1,ADD2,SLC12A5,FABP7,CACNG3,CACNG2,LRFN2,SALL2,SLC24A4,SCN1A,SCN2A,LRRTM4,NLGN2,ACTL6B,ELMOD1,KCNT1,SLC9A6,MOBP,FOXG1,MOG,SEMA3F,AMPH,GSX1,PPFIA2,CNIH2,SH3GL2,SH3GL3,CNTNAP1,APBA2,DPYSL4,SLITRK3,BCAN,PEX5L,AQP4,SLC1A2,SLC1A3,SLC6A1,SPTBN4,RGS14,SLC8A2,SLC8A3,SIRT2,NAPB,CADPS,ASCL1,CSPG5,FUT9,KCNK5,S…
Mouse Phenotype	MP:0002064	seizures		6.497e-32	2.968e-28	7.421e-29	6.682e-28	91	382	MAG,SYN3,MAPT,APC2,MBP,KCNIP1,STX1B,SLC12A5,CACNG2,SCN1A,SLC9A6,AMPH,SH3GL2,SH3GL3,SLITRK3,SLC1A2,SLC1A3,NAPB,SLC17A8,SNAP25,ATP1A3,FYN,NEUROD6,FAIM2,GABBR1,GABRA1,SOX1,GABRG2,GAD2,HCN2,GDI1,GFAP,NCDN,SYNGAP1,CDK5R1,NEUROD1,NEUROD2,SYN1,SYN2,SYP,DCLK2,GNAO1,BSN,GNG3,CNTN2,CACNA1A,TCF12,CAMK2A,GRIA2,GRIA3,GRIA4,GRIK2,GRIK4,GRIK5,GRIN1,TECTA,GRM5,P2RX6,LGI1,PDYN,CHN1,SYNPR,CHRNA4,CHRNB2,QKI,PLP1,CN…
Mouse Phenotype	MP:0002063	abnormal learning/memory/conditioning		3.639e-30	1.663e-26	3.212e-27	2.892e-26	121	670	GJD2,SYN3,MAP1B,MAP2,MAPT,MBP,ADAM11,ADCY8,ADCYAP1R1,ADD2,SLC12A5,FABP7,LRFN2,NLGN2,SLC9A6,AMPH,APBA2,APBB1,PEX5L,SLC6A1,RGS14,SLC8A2,GALNTL5,SORCS3,B3GAT1,SNAP25,TBR1,ATP1A2,ATP1A3,FYN,NEUROD6,ANKFN1,GABBR1,GABRA1,GABRA5,GABRB1,GABRG2,GAD2,JPH4,GALR1,CPLX2,FXYD6,NPAS3,NCAM1,GDI1,GFAP,NCDN,SYNGAP1,C1QL1,CDK5R1,ARHGEF9,ARC,SYN1,SYN2,SYT4,WSCD1,GPR6,PRLHR,NRCAM,CAMK2A,HCN1,CAST,GRIA1,GRIA2,GRIA4,GR…
Mouse Phenotype	MP:0014114	abnormal cognition		4.218e-30	1.927e-26	3.212e-27	2.892e-26	121	671	GJD2,SYN3,MAP1B,MAP2,MAPT,MBP,ADAM11,ADCY8,ADCYAP1R1,ADD2,SLC12A5,FABP7,LRFN2,NLGN2,SLC9A6,AMPH,APBA2,APBB1,PEX5L,SLC6A1,RGS14,SLC8A2,GALNTL5,SORCS3,B3GAT1,SNAP25,TBR1,ATP1A2,ATP1A3,FYN,NEUROD6,ANKFN1,GABBR1,GABRA1,GABRA5,GABRB1,GABRG2,GAD2,JPH4,GALR1,CPLX2,FXYD6,NPAS3,NCAM1,GDI1,GFAP,NCDN,SYNGAP1,C1QL1,CDK5R1,ARHGEF9,ARC,SYN1,SYN2,SYT4,WSCD1,GPR6,PRLHR,NRCAM,CAMK2A,HCN1,CAST,GRIA1,GRIA2,GRIA4,GR…
Mouse Phenotype	MP:0002882	abnormal neuron morphology		3.888e-28	1.777e-24	2.538e-25	2.285e-24	193	1509	MAG,SYN3,MAP1A,MAP1B,MAP2,MAP6,MAPT,APC2,MBP,ETV1,MCF2,CD46,CEND1,DSCAML1,STX1B,SLC12A5,CACNG2,LRFN2,SCN1A,NLGN2,ACTL6B,SLC9A6,FOXG1,MOG,SEMA3F,SH3GL2,SH3GL3,CNTNAP1,APBB1,DPYSL4,SLITRK3,SLC1A2,SLC1A3,SPTBN4,SIRT2,NAPB,CADPS,ASCL1,SLIT1,SLC17A8,ASTN1,TBR1,ATP1A3,BRSK1,ATP1B2,FYN,NEUROD6,ATP2B2,MEGF11,UNC13A,GABBR1,GABRA1,GABRA5,SOX1,GABRG2,SOX11,NKX6-2,KIF1A,GAP43,SRRM4,KIF1B,BBS2,NCAM1,NDP,GDI1,…
Mouse Phenotype	MP:0002910	abnormal excitatory postsynaptic currents		5.663e-25	2.587e-21	3.234e-22	2.912e-21	48	137	SYN3,DSCAML1,STX1B,CACNG3,CACNG2,LRFN2,NLGN2,SH3GL2,SH3GL3,APBA2,SLC1A3,NAPB,CADPS,CSPG5,UNC13A,GABBR1,GAD2,CPLX2,DNER,GDI1,SYNGAP1,VAMP2,CACNA1A,CAMK2A,GRIA2,GRID2,GRIK4,GRIK5,GRIN1,IGSF11,GRIN2C,GRM1,SEZ6L,NLGN3,NRXN1,NRXN2,GABBR2,DNM3,PRKCG,SNAP91,KCNJ10,SLC17A7,DLG2,SLC17A6,CACNG8,CACNG7,NETO1,SEZ6
Mouse Phenotype	MP:0002945	abnormal inhibitory postsynaptic currents		1.686e-24	7.703e-21	8.559e-22	7.707e-21	38	85	SYN3,STX1B,NLGN2,APBA2,SLC6A1,CSPG5,GABBR1,GABRA1,GABRA4,GABRA5,GABRG2,GAD1,GAD2,CPLX2,GLRA2,ARHGEF9,SYN1,SYT5,DCLK2,NOVA2,CACNA1A,GRIK1,GRIK2,IL1RAPL1,CHRNA4,NLGN3,NRXN2,CNR1,GABBR2,SLC32A1,CNTNAP4,ERC2,DCX,KCNA1,KCNA2,SNAP91,SV2A,PRRT2
Mouse Phenotype	MP:0002272	abnormal nervous system electrophysiology		4.07e-24	1.86e-20	1.86e-21	1.674e-20	75	339	GJD2,SYN3,MAP1B,MBP,ETV1,ADCY8,SLC12A5,CACNG2,SCN1A,SCN2A,KCNT1,CNTNAP1,SLC1A2,SLC1A3,RGS14,SIRT2,SLC17A8,ATP1A2,NEUROD6,ATP2B2,GABBR1,GABRB1,GABRG2,GAD1,GAD2,JPH4,NKX6-2,HCN2,C1QL1,NEUROD1,GLRA2,ARC,SYN1,SYN2,BSN,GNG3,CACNA1A,NRCAM,HCN1,GRIA1,GRIA2,GRIA4,GRID2,GRIK1,GRIK2,GRIK4,GRIN1,GRM1,TECTA,GRM5,TNR,LGI1,CADM4,GDAP1,CHN1,CHRNA4,CHRNB2,NALCN,PLP1,CNP,PMP2,HSPG2,GABBR2,SLC32A1,KCNA1,KCNA2,SNAP…
Domain	PF01094	ANF_receptor	Pfam	3.405e-15	1.019e-11	5.097e-12	4.374e-11	18	37	GABBR1,GRIA1,GRIA2,GRIA3,GRIA4,GRID1,GRID2,GRIK1,GRIK2,GRIK3,GRIK4,GRIK5,GRIN1,GRIN2C,GRM1,GRM3,GRM5,GABBR2
Domain	IPR001828	ANF_lig-bd_rcpt	InterPro	3.405e-15	1.019e-11	5.097e-12	4.374e-11	18	37	GABBR1,GRIA1,GRIA2,GRIA3,GRIA4,GRID1,GRID2,GRIK1,GRIK2,GRIK3,GRIK4,GRIK5,GRIN1,GRIN2C,GRM1,GRM3,GRM5,GABBR2
Domain	IPR028082	Peripla_BP_I	InterPro	1.104e-14	3.305e-11	5.461e-12	4.687e-11	18	39	GABBR1,GRIA1,GRIA2,GRIA3,GRIA4,GRID1,GRID2,GRIK1,GRIK2,GRIK3,GRIK4,GRIK5,GRIN1,GRIN2C,GRM1,GRM3,GRM5,GABBR2
Domain	PF10613	Lig_chan-Glu_bd	Pfam	1.824e-14	5.461e-11	5.461e-12	4.687e-11	13	18	GRIA1,GRIA2,GRIA3,GRIA4,GRID1,GRID2,GRIK1,GRIK2,GRIK3,GRIK4,GRIK5,GRIN1,GRIN2C
Domain	SM00918	Lig_chan-Glu_bd	SMART	1.824e-14	5.461e-11	5.461e-12	4.687e-11	13	18	GRIA1,GRIA2,GRIA3,GRIA4,GRID1,GRID2,GRIK1,GRIK2,GRIK3,GRIK4,GRIK5,GRIN1,GRIN2C
Domain	IPR001508	Iono_rcpt_met	InterPro	1.824e-14	5.461e-11	5.461e-12	4.687e-11	13	18	GRIA1,GRIA2,GRIA3,GRIA4,GRID1,GRID2,GRIK1,GRIK2,GRIK3,GRIK4,GRIK5,GRIN1,GRIN2C
Domain	SM00079	PBPe	SMART	1.824e-14	5.461e-11	5.461e-12	4.687e-11	13	18	GRIA1,GRIA2,GRIA3,GRIA4,GRID1,GRID2,GRIK1,GRIK2,GRIK3,GRIK4,GRIK5,GRIN1,GRIN2C
Domain	PF00060	Lig_chan	Pfam	1.824e-14	5.461e-11	5.461e-12	4.687e-11	13	18	GRIA1,GRIA2,GRIA3,GRIA4,GRID1,GRID2,GRIK1,GRIK2,GRIK3,GRIK4,GRIK5,GRIN1,GRIN2C
Domain	IPR019594	Glu/Gly-bd	InterPro	1.824e-14	5.461e-11	5.461e-12	4.687e-11	13	18	GRIA1,GRIA2,GRIA3,GRIA4,GRID1,GRID2,GRIK1,GRIK2,GRIK3,GRIK4,GRIK5,GRIN1,GRIN2C
Domain	IPR001320	Iontro_rcpt	InterPro	1.824e-14	5.461e-11	5.461e-12	4.687e-11	13	18	GRIA1,GRIA2,GRIA3,GRIA4,GRID1,GRID2,GRIK1,GRIK2,GRIK3,GRIK4,GRIK5,GRIN1,GRIN2C
Pathway	1268763	Neuronal System	BioSystems: REACTOME	1.358e-39	2.206e-36	2.206e-36	1.758e-35	82	351	KCNH7,GJD2,SYN3,RTN3,ACTN2,ADCY2,ADCY8,CACNG3,CACNG2,LRFN2,LRRTM4,NLGN2,PPFIA2,APBA2,SLC1A2,SLC1A3,SLC6A1,SNAP25,GABBR1,GABRA1,GABRA4,GABRA5,GABRB1,GABRG2,GAD1,GAD2,HCN2,ABCC8,VAMP2,ARHGEF9,SYN1,SYN2,GNG3,CACNA1A,CACNA1E,CAMK2A,HCN1,GRIA1,GRIA2,GRIA3,GRIA4,GRIK1,GRIK2,GRIK3,GRIK4,GRIK5,GRIN1,GRIN2C,GRM1,GRM5,TSPAN7,DLGAP1,CHRNA4,CHRNB2,NLGN3,DLGAP3,NRXN1,NRXN2,GABBR2,SLC32A1,LRRTM2,PRKCG,LRRTM3,K…
Pathway	1268766	Transmission across Chemical Synapses	BioSystems: REACTOME	9.166e-25	1.49e-21	7.448e-22	5.936e-21	51	218	SYN3,ACTN2,ADCY2,ADCY8,CACNG3,CACNG2,PPFIA2,SLC1A2,SLC1A3,SLC6A1,SNAP25,GABBR1,GABRA1,GABRA4,GABRA5,GABRB1,GABRG2,GAD1,GAD2,VAMP2,ARHGEF9,SYN1,SYN2,GNG3,CACNA1A,CACNA1E,CAMK2A,GRIA1,GRIA2,GRIA3,GRIA4,GRIK1,GRIK2,GRIK3,GRIK4,GRIK5,GRIN1,GRIN2C,TSPAN7,CHRNA4,CHRNB2,GABBR2,SLC32A1,PRKCG,KCNJ4,KCNJ9,KCNJ10,SLC17A7,DLG4,RAB3A,CACNG8
Pathway	P00037	Ionotropic glutamate receptor pathway	PantherDB	3.193e-20	5.188e-17	1.729e-17	1.378e-16	23	46	SLC1A2,SLC1A3,SLC17A8,SNAP25,VAMP8,VAMP2,CACNA1A,CACNA1E,CAMK2A,GRIA1,GRIA2,GRIA3,GRIA4,GRIK1,GRIK2,GRIK3,GRIK4,GRIK5,GRIN1,GRIN2C,GRM3,SLC17A6,SHANK1
Pathway	1268786	Neurotransmitter Receptor Binding And Downstream Transmission In The Postsynaptic Cell	BioSystems: REACTOME	1.409e-17	2.29e-14	5.725e-15	4.563e-14	35	147	ACTN2,ADCY2,ADCY8,CACNG3,CACNG2,GABBR1,GABRA1,GABRA4,GABRA5,GABRB1,GABRG2,ARHGEF9,GNG3,CAMK2A,GRIA1,GRIA2,GRIA3,GRIA4,GRIK1,GRIK2,GRIK3,GRIK4,GRIK5,GRIN1,GRIN2C,TSPAN7,CHRNA4,CHRNB2,GABBR2,PRKCG,KCNJ4,KCNJ9,KCNJ10,DLG4,CACNG8
Pathway	583255	Nicotine addiction	BioSystems: KEGG	2.198e-16	3.571e-13	7.143e-14	5.694e-13	19	40	SLC17A8,GABRA1,GABRA4,GABRA5,GABRB1,GABRG1,GABRG2,CACNA1A,GRIA1,GRIA2,GRIA3,GRIA4,GRIN1,GRIN2C,CHRNA4,CHRNB2,SLC32A1,SLC17A7,SLC17A6
Pathway	P00039	Metabotropic glutamate receptor group III pathway	PantherDB	2.836e-16	4.608e-13	7.68e-14	6.121e-13	23	64	STX1B,SLC1A2,SLC1A3,SNAP25,VAMP8,VAMP2,GNG3,CACNA1A,CACNA1E,GRIA1,GRIA2,GRIA3,GRIA4,GRIK1,GRIK2,GRIK3,GRIK4,GRIK5,GRIN1,GRIN2C,GRM1,GRM5,SLC17A7
Pathway	213818	Glutamatergic synapse	BioSystems: KEGG	1.118e-14	1.817e-11	2.596e-12	2.069e-11	28	114	ADCY2,ADCY8,SLC1A2,SLC1A3,SLC17A8,GNAO1,GNG3,CACNA1A,GRIA1,GRIA2,GRIA3,GRIA4,GRIK1,GRIK2,GRIK3,GRIK4,GRIK5,GRIN1,GRIN2C,GRM1,GRM3,GRM5,DLGAP1,PRKCG,SLC17A7,DLG4,SLC17A6,SHANK1
Pathway	1427849	Protein-protein interactions at synapses	BioSystems: REACTOME	8.486e-14	1.379e-10	1.724e-11	1.374e-10	22	73	RTN3,LRFN2,LRRTM4,NLGN2,APBA2,GRIA1,GRIA3,GRIA4,GRIN1,GRIN2C,GRM1,GRM5,DLGAP1,NLGN3,DLGAP3,NRXN1,NRXN2,LRRTM2,LRRTM3,DLG2,DLG4,SHANK1
Pathway	537443	Retrograde endocannabinoid signaling	BioSystems: KEGG	2.517e-13	4.091e-10	4.545e-11	3.623e-10	25	101	ADCY2,ADCY8,SLC17A8,GABRA1,GABRA4,GABRA5,GABRB1,GABRG1,GABRG2,GNAO1,GNG3,CACNA1A,GRIA1,GRIA2,GRIA3,GRIA4,GRM1,GRM5,CNR1,SLC32A1,PRKCG,MAPK13,KCNJ9,SLC17A7,SLC17A6
Pathway	1339115	Cardiac conduction	BioSystems: REACTOME	2.274e-11	3.695e-08	3.695e-09	2.945e-08	27	142	KCNIP2,KCNIP1,CACNG3,CACNG2,SCN1A,SCN2A,SCN3A,SLC8A2,SLC8A3,KCNK5,ATP1A2,ATP1A3,ATP1B2,ATP2B2,ATP2B3,SCN3B,AHCYL1,SRI,FXYD7,FXYD6,NPPA,CAMK2A,KCNK4,KCND2,KCNJ4,CACNG8,CACNG7
Pubmed	19086053	Identification of new putative susceptibility genes for several psychiatric disorders by association analysis of regulatory and non-synonymous SNPs of 306 genes involved in neurotransmission and neurodevelopment.	Pubmed	1.648e-42	5.339e-38	5.339e-38	5.854e-37	57	300	ACTN2,ADCYAP1R1,GNRHR2,S100B,NLGN2,CNTNAP1,SLC1A2,SLC1A3,SLC6A1,ASTN1,SNAP25,GABBR1,GABRA1,GABRA5,GABRG1,GABRG2,GAD1,GAD2,GALR1,NCAM1,NCAM2,NEUROD1,NEUROD2,GLRA2,SYN1,CNTN2,NPPA,NRCAM,NEUROD4,NTRK3,GRIA1,GRIA2,GRIA3,GRIA4,GRIK1,GRIK2,GRIK3,GRIK4,GRIK5,GRM3,GRM5,CCK,PDYN,NTSR2,CHRNB2,NRXN1,NRXN2,CNR1,CNTFR,HTR1A,HTR5A,GABBR2,MAGI2,SNAP91,SLC17A7,DLG2,SLC17A6
Pubmed	19156168	Pharmacogenetics of antipsychotic response in the CATIE trial: a candidate gene analysis.	Pubmed	4.397e-23	1.424e-18	7.121e-19	7.807e-18	27	118	ADCY2,ADCY8,CACNG2,SLC1A2,SLC1A3,SNAP25,GAD1,GAD2,SYT11,SYT4,CAMK2A,GRIA1,GRIA2,GRIA3,GRIA4,GRIN1,GRIN2C,GRM1,GRM3,GRM5,HRH3,CHRNA4,CHRNB2,HTR1A,HTR5A,SLC17A7,SLC17A6
Pubmed	16169070	A human protein-protein interaction network: a resource for annotating the proteome.	Pubmed	1.581e-19	5.119e-15	1.706e-15	1.871e-14	85	1683	DPF1,USP11,ACP5,ACTN2,ADAM11,S100A4,CORO2B,SCN2A,ACTL6B,FOXG1,SEMA3F,ANXA11,SH3GL2,SH3GL3,DPYSL4,APLP1,RUFY3,CADPS,SNAP25,SNCB,PEA15,GABBR1,NOL4,MYH9,TNFSF10,KIF1B,NAP1L5,SRI,FXYD6,SRPRA,GLRA2,SVIL,SYN1,SYT5,GNAO1,NOVA1,TCF12,STMN2,CASP6,CASP8,GRIK5,TGIF1,LINGO1,FAM107A,PDLIM1,CELF3,TSPAN7,PAWR,CDH10,PNMA1,GABARAPL2,CHGB,CHN1,CPNE6,NRXN2,CAMKV,MAPK8IP1,TNPO2,POU3F3,FSD1,GABBR2,CRMP1,CELSR1,FEZ1,T…
Pubmed	9110174	Large-scale concatenation cDNA sequencing.	Pubmed	3.423e-17	1.109e-12	2.772e-13	3.038e-12	44	563	ETV1,ADCY2,REEP2,ADD2,SLC12A5,TAGLN2,ALDOC,ANK2,APBA2,APC,SLC1A2,SLC1A3,SIRT2,EFR3B,B3GAT1,SAMD14,AHCYL1,KIF1A,RUNDC3A,NTNG2,SLITRK2,ACSBG1,PCDH11X,NTRK3,RALYL,GRM5,OPCML,FAM107A,DLGAP3,FAM19A5,FLRT1,TMEM109,MAPK8IP1,SCHIP1,LOC728392,CTNND2,NDRG4,TUBB2B,C14orf132,SNAP91,DIAPH1,CALN1,FAM135B,POLR1D
Pubmed	8619474	A "double adaptor" method for improved shotgun library construction.	Pubmed	5.063e-17	1.64e-12	3.28e-13	3.596e-12	44	569	ETV1,ADCY2,REEP2,ADD2,SLC12A5,TAGLN2,ALDOC,ANK2,APBA2,APC,SLC1A2,SLC1A3,SIRT2,EFR3B,B3GAT1,SAMD14,AHCYL1,KIF1A,RUNDC3A,NTNG2,SLITRK2,ACSBG1,PCDH11X,NTRK3,RALYL,GRM5,OPCML,FAM107A,DLGAP3,FAM19A5,FLRT1,TMEM109,MAPK8IP1,SCHIP1,LOC728392,CTNND2,NDRG4,TUBB2B,C14orf132,SNAP91,DIAPH1,CALN1,FAM135B,POLR1D
Pubmed	15217342	The synaptic vesicle cycle.	Pubmed	1.099e-16	3.561e-12	5.934e-13	6.506e-12	14	34	SYN3,PPFIA2,SNAP25,UNC13A,CPLX2,VAMP2,SYN1,SYN2,SYP,BSN,ERC2,SV2A,RAB3A,UNC13C
Pubmed	11076863	DNA cloning using in vitro site-specific recombination.	Pubmed	3.535e-16	1.145e-11	1.636e-12	1.793e-11	51	794	SLC10A3,ADAM11,KCNIP2,PLEKHN1,NDRG2,SNN,ADCY8,FAM192A,SCAMP5,FAM19A1,HPCAL4,LRRC8E,PSD2,SYT3,RNF149,APC,CSPG5,SNAP25,PHYHIPL,SCN3B,GAP43,FXYD6,NDP,HCN2,GDI1,GPM6B,TCF12,CAST,GRM1,IL1RAPL1,KLHL25,FAM107A,SNTG1,GPR85,GABARAPL2,SYNPR,OPALIN,ZIC3,SLC30A7,LRRC3B,NCAN,DNM3,CTNND2,NDRG4,ITGB1,KCNK4,SV2A,RAB39B,FAM57B,KRT8,EPHA5
Pubmed	20859245	Glutamatergic gene variants impact the clinical profile of efficacy and side effects of haloperidol.	Pubmed	4.088e-16	1.324e-11	1.655e-12	1.814e-11	10	13	GAD1,GRIA1,GRIA3,GRIA4,GRID2,GRIK1,GRIK2,GRIK3,GRIK4,GRM1
Pubmed	23251661	Novel genetic loci identified for the pathophysiology of childhood obesity in the Hispanic population.	Pubmed	4.608e-15	1.493e-10	1.659e-11	1.818e-10	50	817	CD46,GALNT13,LRFN2,GPC5,DPP10,SH3GL2,TRIM67,SLIT1,CTNNA3,KCNK5,UNC13A,MYO16,GABRB1,B3GALT1,SOX11,GALR1,MBOAT1,SRRM4,CPLX2,BAIAP2L1,CDK5R2,CAMK2A,SYT6,GRIA1,GRID2,GRIK2,IGSF11,GSG1L,DLGAP1,HPS1,NXPH1,POU3F2,AATK,ZNF536,DPYSL5,MDGA2,ZNF217,DCC,MAGI2,CDH20,KCNB1,DLG2,DSCAM,PAK5,TOM1L1,RGS7,PLEKHG6,ASB3,ELAVL4,B3GAT2
Pubmed	19165527	Prefrontal cortex shotgun proteome analysis reveals altered calcium homeostasis and immune system imbalance in schizophrenia.	Pubmed	4.216e-14	1.366e-09	1.25e-10	1.37e-09	17	84	MAP1A,MAP2,MAP6,ERMN,MOG,SH3GL2,CADM3,LANCL2,BSN,CNP,ATCAY,PRKCG,CTNND2,MYL12B,TUBB2B,DNAJC6,RLBP1
Interaction	int:DGUOK	DGUOK interactions		1.723e-27	1.333e-23	1.333e-23	1.271e-22	34	71	MAP2,MAPT,STX1B,SLC12A5,TMEM184A,HPCAL4,AMPH,ANK2,DPYSL4,RAB6B,NAPB,SNAP25,SNCB,ATP2B2,ATP2B3,NCAM1,VAMP2,SYN1,SYN2,SYP,GNAO1,GPM6B,CAMK2A,GRIA2,HPCA,CAMKV,CRMP1,ERC2,DPYSL5,DCX,SNAP91,RAB3A,DPYSL2,ELAVL4
Interaction	int:DNAAF2	DNAAF2 interactions		1.061e-23	8.21e-20	2.976e-20	2.837e-19	33	82	MAPT,STX1B,HPCAL4,AMPH,ANK2,DPYSL4,RAB6B,NAPB,SNAP25,SNCB,PHYHIPL,ATP2B2,NCAM1,SYN1,SYN2,SYP,GNAO1,GPM6A,GPM6B,CAMK2A,GRIA2,HPCA,CAMKV,CRMP1,DNM3,NDRG4,DPYSL5,DCX,SNAP91,RAB3A,DPP6,DPYSL2,LSAMP
Interaction	int:NUFIP1	NUFIP1 interactions		1.154e-23	8.929e-20	2.976e-20	2.837e-19	37	107	MAP1A,MAP2,MAPT,STX1B,ADD2,SLC12A5,SCAMP5,HPCAL4,AMPH,ANK2,DPYSL4,RAB6B,NAPB,SNAP25,SNCB,ATP2B2,NCAM1,VAMP2,SYN1,SYP,GNAO1,GNAZ,GPM6A,GPM6B,CAMK2A,GRIA2,HPCA,CAMKV,CRMP1,DNM3,NDRG4,DPYSL5,DCX,CADM2,SNAP91,RAB3A,DPYSL2
Interaction	int:DLG4	DLG4 interactions		3.736e-21	2.891e-17	7.227e-18	6.889e-17	49	223	MAP1A,CD46,ACTN2,CACNG2,NLGN2,PCDH10,AGAP2,CNTNAP1,CNKSR2,SLC1A2,FYN,ATP2B2,KIF1B,NCAM1,GDI1,SYNGAP1,ARC,GNAO1,GPM6A,NRCAM,CAMK2A,GRIA1,GRIA2,GRIA3,GRIA4,GRIK1,GRIK2,GRIK5,GRIN1,GRIN2C,GRM3,PTPN5,LGI1,DLGAP1,RAB3C,NLGN3,DLGAP3,NRXN1,CNP,TUBB2B,KCNA1,KCNA2,KCND2,KCNJ4,KCNJ10,DLG2,DLG4,SHANK1,NETO1
Interaction	int:SYNGAP1	SYNGAP1 interactions		3.754e-15	2.905e-11	5.809e-12	5.537e-11	32	136	CACNG2,AGAP2,AMPH,CNTNAP1,CNKSR2,SLC1A3,DDN,NCAM1,SYNGAP1,ARC,SYN1,GNAO1,GNAZ,CAMK2A,NTRK3,GRIA1,GRIA2,GRIA3,GRIN1,GRM5,DLGAP1,RAB3C,DLGAP3,CNRIP1,NCAN,PRKCG,KCNJ10,DLG2,DLG4,RAB3A,SHANK1,DPYSL2
Interaction	int:DLGAP1	DLGAP1 interactions		1.126e-14	8.716e-11	1.453e-11	1.384e-10	32	141	TMEM132B,CASKIN1,AGAP2,CNTNAP1,APC,CNKSR2,DDN,SYNGAP1,ARC,GRIA1,GRIA2,GRIA3,GRIN1,GRIN2C,LGI1,DLGAP1,DLGAP3,NRXN1,PRKCG,CTNNA2,CTNND2,DNAJC6,KCNA1,KCNA2,KCNJ4,KCNJ10,DIAPH1,DLG2,DLG4,KIF5C,SHANK1,DPYSL2
Interaction	int:HAX1	HAX1 interactions		3.833e-14	2.966e-10	4.237e-11	4.038e-10	30	129	MAP2,MAPT,STX1B,AMPH,ANK2,DPYSL4,RAB6B,NAPB,NCAM1,SVIL,SYN1,SYN2,SYP,GNAO1,GPM6A,GPM6B,CAMK2A,TUBA1C,GRIA2,HPCA,CAMKV,CRMP1,NDRG4,DPYSL5,DCX,SNAP91,RAB3A,DPP6,DPYSL2,POLR1D
Interaction	int:AGAP2	AGAP2 interactions		1.628e-11	1.26e-07	1.575e-08	1.501e-07	33	192	MAP1A,MAP6,AGAP2,ANXA2,PPFIA2,PPM1E,CNKSR2,NCAM2,NCDN,SYNGAP1,GNAO1,GNAZ,CACNA1E,NRCAM,CAMK2A,GRIA1,GRIA2,GRIN1,GRM1,GRM3,GRM5,INA,TNR,DLGAP1,PRMT8,NLGN3,DLGAP3,CRMP1,PRKCG,DLG2,DLG4,SHANK1,DPYSL2
Interaction	int:ARMC1	ARMC1 interactions		2.271e-11	1.758e-07	1.953e-08	1.861e-07	16	44	MAP2,MAPT,STX1B,SNCB,NCAM1,SYN1,SYN2,GNAO1,GPM6A,GPM6B,CAMK2A,CAMKV,CRMP1,DPYSL5,RAB3A,DPYSL2
Interaction	int:DLG1	DLG1 interactions		8.925e-11	6.906e-07	6.863e-08	6.542e-07	23	103	MAP1A,ACTN2,CACNG2,AGAP2,CNKSR2,ATP2B2,KIF1B,SYNGAP1,NRCAM,CAMK2A,GRIA1,GRIK2,GRIN1,PAX6,DLGAP1,DLGAP3,KCNA1,KCNA2,KCNC1,KCNJ4,KCNJ10,DLG2,DLG4
Transcription Factor Binding Site	V$NRSF_01	V$NRSF_01		2.193e-21	1.34e-18	1.34e-18	9.37e-18	33	78	KCNIP2,SLC12A5,SCAMP5,APBB1,RPH3A,DDX25,SNAP25,PHYHIPL,ATP2B2,SCN3B,GABRG2,DNER,CDK5R1,RUNDC3A,SYT4,HCN1,SYT6,STMN2,GRIN1,GRM1,OMG,CELF3,CHRNB2,GDAP1L1,MGAT5B,HTR1A,HTR5A,TRIM9,BARHL1,PTPRN,SLC17A6,ELAVL3,SEZ6
Transcription Factor Binding Site	CAGNWMCNNNGAC_UNKNOWN	CAGNWMCNNNGAC_UNKNOWN		2.841e-15	1.736e-12	8.68e-13	6.07e-12	26	71	KCNIP2,CSMD3,SLC12A5,RPH3A,PHYHIPL,SCN3B,GABRG2,BEX1,DNER,CDK5R1,SYT4,SYT6,GRIN1,GRM1,OMG,CELF3,CHGB,CHRNB2,HPCA,MGAT5B,SCHIP1,HTR1A,BARHL1,PTPRN,SLC17A6,ELAVL3
Transcription Factor Binding Site	CAGGTG_V$E12_Q6	CAGGTG_V$E12_Q6		6.629e-15	4.05e-12	1.35e-12	9.442e-12	185	1956	TTYH1,KCNH7,MAP1A,MAPT,ETV1,RTN3,EVPL,ACTN2,ADAM11,RREB1,KCNIP2,KCNIP1,RTN1,DSCAML1,SLC22A17,ADCY8,EHD4,SLC12A5,CORO2B,TMEM184A,GPR158,SCAMP5,GPR157,CASKIN1,SCNN1A,CRB3,FGF1,HES6,TAGLN2,SDC1,HPCAL4,KCNQ1DN,AGAP2,SEMA3F,GSX1,ANK2,SYT3,SH3GL2,SLITRK3,CNKSR2,RPH3A,ARF6,MT3,FUT9,SMARCD2,SNAP25,TBR1,FYN,ATP2B3,SCN3B,GABRB1,SOX3,GABRG2,GAD1,NOL4,GAD2,AHCYL1,ARPP21,NKX6-2,GALR1,GAP43,NCAM1,NCAM2,NDP,GFA…
Transcription Factor Binding Site	AACTTT_UNKNOWN	AACTTT_UNKNOWN		2.07e-14	1.265e-11	3.162e-12	2.211e-11	154	1531	MAP1B,ETV1,MCF2,RREB1,KCNIP1,CSMD3,LRP1B,ADCY2,DSCAML1,SLITRK1,SNN,ADCY8,EHD4,CACNG3,CACNG2,TMEM196,FAM192A,SLC24A4,SCN1A,LRRTM4,CRB3,PCDH10,SEMA3F,PPFIA2,ANXA11,SH3GL2,PPM1E,SLITRK3,CNKSR2,CPNE5,SLC1A3,ARF6,SLC6A1,TMEFF1,MYL12A,DACH2,CADPS,CXXC4,CTNNA3,FUT9,SORCS3,NEUROD6,GABRA1,GABRB1,SOX1,SOX3,GABRG1,NOL4,ARPP21,SALL3,TNFSF10,MYT1,NAP1L5,NPAS3,C11orf87,NCAM2,NDP,MSTN,NCDN,KIRREL3,CNTNAP5,NTNG2…
Transcription Factor Binding Site	GGGAGGRR_V$MAZ_Q6	GGGAGGRR_V$MAZ_Q6		1.969e-11	1.203e-08	2.111e-09	1.476e-08	166	1838	MAPT,APC2,ETV1,RTN3,ADAM11,KCNIP2,NDRG2,SLC22A17,SLITRK1,SLC12A5,CACNG2,S100A4,SCNN1A,NLGN2,SDC1,HPCAL4,KCNQ1DN,AGAP2,AMPH,SYT3,PPM1E,APBB1,SLITRK3,CNKSR2,RAB6B,ARF6,TMEFF1,SPTBN4,CADPS,ASCL1,DLL3,SNAP25,SNCB,ATP1A2,ATP1A3,VAMP8,ATP1B2,FYN,GABBR1,SCN3B,GABRG2,SOX11,NOL4,JPH4,GAP43,SPINT1,MYT1,KIF1B,CPLX2,FXYD6,NCAM1,NCAM2,HCN2,NCDN,STAT6,NT5C1A,KIRREL3,RUNDC3A,CNTNAP5,NEUROD2,SYT11,NFKB2,PCDH11X,…
Transcription Factor Binding Site	GCANCTGNY_V$MYOD_Q6	GCANCTGNY_V$MYOD_Q6		2.073e-11	1.266e-08	2.111e-09	1.476e-08	85	721	MAP1A,ETV1,ADAM11,CSMD3,SLC22A17,SLC12A5,TMEM184A,GPR158,HES6,NLGN2,KCNQ1DN,ANK2,CNKSR2,SLC8A3,CADPS,DLL3,ATP1A3,FYN,NEUROD6,SCN3B,B3GALT2,NOL4,NKX6-2,GALR1,MYT1,KIF1B,NCAM1,C11orf87,GFAP,NEUROD1,STXBP2,SVIL,SYT4,CTAGE4,CDK5R2,NOVA1,TCF12,NTRK3,SYT6,RALYL,STMN2,GRB7,GRIK3,SHISA7,OPCML,CRB1,CELF3,NR2E1,MUM1,SYTL1,PCDH9,CDH10,PNMA1,CD2AP,GPR37L1,HPCA,RAB33A,NRXN2,RBM47,VDR,SLC4A8,CLDN7,LRRN3,PHACTR…
Transcription Factor Binding Site	CTTTGT_V$LEF1_Q2	CTTTGT_V$LEF1_Q2		4.39e-11	2.683e-08	3.832e-09	2.68e-08	145	1547	DPF1,MAP1B,MAP2,MAPT,APC2,ETV1,MCF2,RTN3,CSMD3,NDRG2,RTN1,SLITRK1,SNN,TMEM196,FAM192A,SALL2,SCN3A,HES6,SDC1,SEMA3F,GSX1,ANK2,DPYSL4,CNKSR2,AQP4,SLC6A1,TMEFF1,DLL3,CXXC4,ATP1A3,ATP1B2,FYN,NEUROD6,B3GALT2,GABRG2,SOX11,GAD1,NOL4,AHCYL1,ARPP21,SALL3,TNFSF10,MYT1,KIF1B,FXYD6,NDP,GDF1,MSTN,CDK5R1,SLITRK2,NEUROD1,NEUROD2,SYT11,GLRA2,SVIL,VAMP2,PCDH11X,SYT4,NKX2-2,CNTN2,GPM6A,GPM6B,CACNA1E,GPR12,TCF12,NR…
Transcription Factor Binding Site	CAGCTG_V$AP4_Q5	CAGCTG_V$AP4_Q5		3.787e-10	2.314e-07	2.892e-08	2.023e-07	117	1192	MAP1A,MBP,ETV1,MCF2,KCNIP2,CSMD3,SLC22A17,SNN,ADCY8,CACNG2,CORO2B,TMEM184A,SCAMP5,CASKIN1,FGF1,HES6,KCNQ1DN,MOG,AGAP2,AMPH,ANK2,PPM1E,APBA2,SLC8A3,NAPB,CADPS,DLL3,CXXC4,KCNK5,TBR1,ATP1A2,VAMP8,ATP1B2,ATP2B3,SCN3B,B3GALT2,NOL4,ARPP21,MYO1C,GAP43,MYT1,KIF1B,NAP1L5,C11orf87,MSTN,CYP46A1,NCDN,CNTNAP5,NTNG2,NEUROD2,SVIL,NKX2-2,GNG3,CDK5R2,CNTN2,NOVA1,GPM6B,NPPA,GPR17,TCF12,SYT6,CAST,STMN2,GRIK3,OMG,OP…
Transcription Factor Binding Site	CTGCAGY_UNKNOWN	CTGCAGY_UNKNOWN		9.657e-09	5.9e-06	6.556e-07	4.585e-06	69	607	MAP1A,MAP1B,MAPT,APC2,ETV1,MCF2,ADAM11,KCNIP1,LRP1B,SLC22A17,SLITRK1,SLC12A5,CACNG3,CACNG2,FGF1,NLGN2,SLC9A6,SYT3,SLITRK3,ATP1A3,FYN,B3GALT2,NOL4,BEX1,HAPLN4,C11orf87,NCDN,GNG3,CDK5R2,CNTN2,NOVA1,GPM6A,STMN2,GRIA3,GRIA4,GRIK2,OMG,SHISA7,OPCML,IL1RAPL1,HEY1,TIMP4,PAX6,PCDH9,HRH3,DLGAP1,RAB3C,NLGN3,NRXN1,C17orf102,PRKD2,ZDHHC5,PPP2R2B,BARHL1,PHACTR3,CTNND2,PSD,FSTL5,DCX,DLG2,KIF3C,RAB3A,CALN1,DPYSL…
Transcription Factor Binding Site	GGGTGGRR_V$PAX4_03	GGGTGGRR_V$PAX4_03		5.739e-08	3.506e-05	3.506e-06	2.452e-05	101	1068	DPF1,KCNH7,MAP1A,MAP1B,MAPT,RTN3,EVPL,ADAM11,NDRG2,SLC12A5,CACNG2,SCAMP5,LRRTM4,NLGN2,SLC9A6,HPCAL4,GSX1,ANK2,PPFIA2,SLITRK3,CPNE5,RAB6B,AQP4,SPTBN4,RGS14,ATP1A3,ATP1B2,FYN,SCN3B,GABRG2,NOL4,MYO1C,GAP43,FXYD7,C11orf87,NCAM2,NCDN,STAT6,C1QL1,RUNDC3A,SLITRK2,NEUROD2,GNAO1,DENND5A,CDK5R2,CNTN2,CACNA1A,GPM6B,CACNA1E,GPR17,SYT6,CAST,STMN2,GRB7,GRIA3,GRIK1,GRIK3,TEAD3,GRM3,THRA,HEY1,PAX6,SEZ6L,GPR85,AT…
Gene Family	555	Receptor Tyrosine Kinases|Fibronectin type III domain containing|V-set domain containing|Immunoglobulin like domain containing	genenames.org	1.89e-11	5.596e-09	5.596e-09	3.508e-08	26	160	DSCAML1,LRFN2,COL20A1,TRIM67,ASTN1,ANKFN1,PHYHIPL,NCAM1,NCAM2,CNTN2,NRCAM,TNR,FLRT1,CNTFR,FNDC3B,IGDCC3,FSD1,LRRN3,TRIM9,DCC,FNDC7,PTPRZ1,DSCAM,EPHA1,EPHA5,EPHB1
Gene Family	593	Fibronectin type III domain containing|I-set domain containing|Immunoglobulin like domain containing	genenames.org	1.271e-10	3.763e-08	1.882e-08	1.18e-07	25	161	MAG,DSCAML1,LRFN2,LRRC4C,NCAM1,NCAM2,KIRREL3,CNTN2,LRIT2,NRCAM,NTRK3,IGSF11,OPCML,IL1RAPL1,LINGO1,HSPG2,IGDCC3,LRRN3,FSTL5,MDGA2,DCC,CADM2,DSCAM,LRRC4B,LSAMP
Gene Family	1199	Glutamate ionotropic receptor kainate type subunits	genenames.org	4.108e-08	1.216e-05	4.053e-06	2.541e-05	5	5	GRIK1,GRIK2,GRIK3,GRIK4,GRIK5
Gene Family	1200	Glutamate ionotropic receptor AMPA type subunits	genenames.org	1.245e-06	0.0003687	9.216e-05	0.0005778	4	4	GRIA1,GRIA2,GRIA3,GRIA4
Gene Family	262	G protein-coupled receptors, Class A orphans	genenames.org	1.59e-06	0.0004707	9.414e-05	0.0005902	13	78	GPR162,GPR75,GPR6,GPR12,GPR17,GPR22,GPR45,GPR173,GPR85,GPR37L1,GPR151,GPR62,GPR61
Gene Family	274	Potassium voltage-gated channels	genenames.org	5.023e-06	0.001487	0.0002478	0.001553	9	40	KCNH7,KCNA1,KCNA2,KCNA6,KCNB1,KCNC1,KCND2,KCNF1,KCNQ2
Gene Family	563	Gamma-aminobutyric acid type A receptor subunits	genenames.org	2.448e-05	0.007247	0.0009574	0.006002	6	19	GABRA1,GABRA4,GABRA5,GABRB1,GABRG1,GABRG2
Gene Family	21	Non-clustered protocadherins	genenames.org	2.588e-05	0.007659	0.0009574	0.006002	5	12	PCDH10,PCDH11X,PCDH8,PCDH9,PCDH11Y
Gene Family	1261	Zinc fingers C2H2C-type	genenames.org	3.77e-05	0.01116	0.001116	0.006996	3	3	MYT1L,MYT1,ST18
Gene Family	1325	Synapsins	genenames.org	3.77e-05	0.01116	0.001116	0.006996	3	3	SYN3,SYN1,SYN2
Coexpression	M2019	Genes with high-CpG-density promoters (HCP) bearing histone H3 trimethylation mark at K27 (H3K27me3) in MEF cells (embryonic fibroblast).	MSigDB C2: CGP Curated Gene Sets (v6.0)	4.893e-66	4.805e-62	4.805e-62	4.694e-61	133	589	TTYH1,KCNH7,GJD2,PAQR6,ACTN2,ADAM11,KCNIP1,DSCAML1,SLC12A5,CRB3,ACTL6B,SVOP,KCNT1,FOXG1,GSX1,PSD2,DPP10,APBA2,SLITRK3,BCAN,SLC7A14,SLC6A1,SLC8A2,CSPG5,SKAP1,SLIT1,DLL3,MAST1,SORCS3,ASTN1,SNAP25,SNCB,ATP1A3,ATP2B2,SCN3B,GABRA5,SOX1,CADM3,GAD1,NKX6-2,GALR1,LHFPL4,TTC9B,SRRM4,CPLX2,C1QL1,RUNDC3A,NEUROD1,NEUROD2,ABCC8,INSM2,LUZP2,NKX2-2,MMD2,BSN,CDK5R2,CNTN2,WSCD1,ACSL6,CACNA1E,VWC2,GPR12,CABP7,HCN1,…
Coexpression	18223198-TableS3	Human Brain_Chen-Plotkin08_747genes	GeneSigDB	1.064e-54	1.045e-50	5.16e-51	5.041e-50	121	594	SYN3,MAP1B,MAP2,RTN3,ACTN2,RREB1,RTN1,ADD2,SLC12A5,CACNG3,S100A4,SCAMP5,SCN2A,ACTL6B,SLC9A6,HPCAL4,AMPH,SH3GL2,CNTNAP1,APBA2,CNKSR2,RAB6B,AQP4,RPH3A,RUFY3,TMEFF1,RASL10A,ARHGDIG,SLC8A2,ASCL1,SLCO1A2,TAGLN3,PNMA2,SNAP25,SNCB,ATP1A2,FAIM2,ATP2B3,RFPL1S,SCN3B,GABRA1,MYT1L,GAD1,NOL4,GAD2,ARPP21,GAP43,TNFSF10,BEX1,FXYD7,FXYD6,NAP1L3,NCDN,CDK5R1,RUNDC3A,VAMP2,ARHGEF9,SYN1,SYN2,SYP,SYT5,MLLT11,GNAO1,BSN…
Coexpression	19621087-Table1e	Mouse EmbryonicStemCell_Abranches09_919genes	GeneSigDB	1.576e-54	1.548e-50	5.16e-51	5.041e-50	117	555	TTYH1,MAPT,USP11,APC2,CSMD2,SLC22A17,ADCY8,ADD2,SLC12A5,SNX32,SCN3A,HES6,ACTL6B,PCDH10,PSD2,CNIH2,APC,RAB6B,RUFY3,YPEL4,SIRT2,NAPB,ASCL1,TAGLN3,DLL3,EFR3B,SNAP25,UNC13A,MYO16,GABBR1,SCN3B,MYT1L,ATP6V1G2,SRRM4,MYT1,DNER,NPAS3,GDI1,CYP46A1,NACAD,CDK5R1,MLC1,VAMP2,ARHGEF9,PCDH11X,SYT4,MLLT11,GNAZ,CNTN2,GPM6B,ACSL6,GPR22,NEUROD4,RALYL,GRIA2,GRID2,GRIK1,GRIK2,KIF3A,THRA,GPR137C,NR2E1,PCDH9,ARHGAP33,CA…
Coexpression	M10371	Set 'H3K27 bound': genes posessing the trimethylated H3K27 (H3K27me3) mark in their promoters in human embryonic stem cells, as identified by ChIP on chip.	MSigDB C2: CGP Curated Gene Sets (v6.0)	1.077e-48	1.058e-44	2.646e-45	2.585e-44	157	1117	TTYH1,KCNH7,GJD2,MAP6,MAPT,SOX8,IL17D,SCD5,CSMD2,KCNIP2,CSMD3,ADARB2,DSCAML1,SLITRK1,ADCY8,CACNG3,LRFN2,SLC24A4,ACTL6B,GPC5,ELMOD1,HPCAL4,FOXG1,AGAP2,AMPH,GSX1,PSD2,SH3GL2,PPM1E,SLITRK3,BCAN,SLC1A2,SLC6A1,SPTBN4,RASL10A,MT3,TRIM67,DACH2,ASCL1,SKAP1,SLIT1,DDX25,FUT9,SORCS3,ASTN1,TMEM151A,TBR1,ATP1A3,PHYHIPL,GABRA4,ILDR2,NOL4,GAD2,TRADD,NKX6-2,TTLL9,SRRM4,FXYD7,DNER,NCAM1,C1QL1,NT5C1A,KIRREL3,CNTNA…
Coexpression	19185848-TableS1	Mouse StemCell_Read09_438genes	GeneSigDB	1.42e-48	1.394e-44	2.789e-45	2.725e-44	83	299	GJD2,MAPT,APC2,KLHL32,RTN1,ADD2,SCN3A,ACTL6B,CNIH2,PPM1E,APBB1,APC,APLP1,RAB6B,YPEL4,NAPB,CADPS,SPHKAP,EFR3B,MAST1,SNAP25,GABBR1,MYT1L,CADM3,JPH4,ARPP21,MYT1,KIF1B,DNER,GPR162,NACAD,CDK5R1,NEUROD1,SYT11,SYP,MLLT11,GNG3,TSPYL4,CNTN2,GPM6A,NPTX1,NRCAM,BRSK2,STMN2,GRIA4,GRIK2,THRA,INA,CELF3,GPR173,CHGB,SYNPR,RAB33A,NRXN1,CNPY1,MGAT5B,MAPK8IP1,CELF5,LRRTM2,NDRG4,SCRT2,CELF4,SCRT1,DNAJC6,DCX,CADM2,STM…
Coexpression	M2115	Genes correlated with proneural type of glioblastoma multiforme tumors.	MSigDB C2: CGP Curated Gene Sets (v6.0)	2.084e-44	2.046e-40	3.411e-41	3.332e-40	63	177	DPF1,TTYH1,MAP2,MAPT,SCN3A,LRRTM4,C1orf61,PPM1E,DPYSL4,BCAN,RUFY3,TMEFF1,ASCL1,SCG3,CSPG5,DLL3,CXXC4,MAST1,SORCS3,ATP1A3,SOX11,NOL4,BEX1,MYT1,FXYD6,NCAM1,CLASP2,C1QL1,CDK5R1,ARHGEF9,PCDH11X,PHLPP1,MLLT11,NKX2-2,GPM6A,GPR17,GRIA2,GRID2,CRB1,IL1RAPL1,CELF3,ARHGAP33,SEZ6L,DUSP26,NLGN3,RAB33A,NRXN1,NRXN2,FLRT1,PURG,PCDH11Y,CRMP1,DNM3,CA10,DCX,STMN4,KLRC3,DPP6,RAP2A,PAK5,SEC61A2,OLIG2,EPHB1
Coexpression	M9898	Set 'Suz12 targets': genes identified by ChIP on chip as targets of the Polycomb protein SUZ12 [GeneID=23512] in human embryonic stem cells.	MSigDB C2: CGP Curated Gene Sets (v6.0)	9.733e-29	9.558e-25	1.365e-25	1.334e-24	120	1038	TTYH1,GJD2,MAP6,MAPT,SCD5,CSMD3,ADARB2,DSCAML1,SLITRK1,ADCY8,SLC12A5,SLC24A4,GPR158,GPC5,ELMOD1,HPCAL4,FOXG1,GSX1,PPM1E,SLITRK3,SLC1A2,SLC6A1,RASL10A,SLC8A3,TRIM67,DACH2,ASCL1,SLIT1,SORCS3,ASTN1,TBR1,PHYHIPL,MEGF11,GABRA4,SOX1,SOX3,CADM3,ILDR2,NOL4,GAD2,TRADD,NKX6-2,DNER,NCAM1,C11orf87,NDP,NT5C1A,KIRREL3,NTNG2,SLITRK2,NEUROD1,NEUROD2,ABCC8,PCDH11X,INSM2,DCLK2,NKX2-2,CDK5R2,CACNA1A,GPM6B,CACNA1E,P…
Coexpression	M1954	Genes with high-CpG-density promoters (HCP) bearing the tri-methylation mark at H3K27 (H3K27me3) in MCV6 cells (embryonic fibroblasts trapped in a differentiated state).	MSigDB C2: CGP Curated Gene Sets (v6.0)	3.144e-28	3.088e-24	3.86e-25	3.771e-24	74	434	CORO2B,KCNT1,PSD2,DPP10,DPYSL4,SLITRK3,BCAN,CPNE5,RAB6B,SLC6A1,SLC8A2,SKAP1,SLIT1,DLL3,PHYHIPL,ATP2B2,ATP2B3,MYO16,GABRA4,GABRA5,NKX6-2,TTC9B,NPAS3,CYP46A1,C1QL1,NEUROD1,ABCC8,MMD2,BSN,CNTN2,WSCD1,PRLHR,CABP7,NTRK3,LHFPL3,TMEM151B,SYT6,BRSK2,GRIA2,GRID1,GRIN2C,GRM1,SHISA7,CCK,PTPN5,SEZ6L,PRMT8,NTSR2,LRTM2,HMX1,CHRNB2,NRXN2,TMEM59L,POU3F3,CLDN7,GABBR2,SLC32A1,C1QL2,RASGEF1C,HES5,CELF4,FBLL1,SCRT1,…
Coexpression	18308945-Table3	Human StemCell_Huang08_60genes_NSCs	GeneSigDB	4.417e-28	4.338e-24	4.82e-25	4.709e-24	29	52	MAP2,ETV1,FABP7,FOXG1,ANK2,AQP4,SLC1A2,SLC1A3,ASCL1,CSPG5,ATP1A2,SOX11,GAD1,GAP43,DNER,GPM6A,GPM6B,GRIA2,FAM107A,PAX6,NRXN1,FAT3,LRRC3B,NCAN,CTNND2,TUBB2B,DCX,PTPRZ1,RFX4
Coexpression	M2892	Genes up-regulated in epithelial kidney cancer cell lines over-expressing an oncogenic form of KRAS [Gene ID=3845] gene.	MSigDB C6: Oncogenic Signatures (v6.0)	3.455e-27	3.394e-23	3.394e-24	3.315e-23	43	143	ETV1,RTN1,SLC12A5,SCN2A,HPCAL4,ANK2,AQP4,SLC1A3,SLC6A1,SCG3,PNMA2,SNAP25,ATP1A2,GABRA1,GABRA5,GABRB1,GAD1,NOL4,ARPP21,GAP43,CDK5R1,WSCD1,GPM6A,NRCAM,GRIA2,GRIK2,GRM5,HEY1,TSPAN7,PCDH9,CHGB,NRXN1,PLP1,PMP2,TCEAL2,TRIM9,DNM3,ERC2,ZNF536,SNAP91,KIF5C,RIT2,MPZL2
Coexpression Atlas	54Dp_Top_500_All	54Dp_Top_500_All	Brain Map - Allen iN	6.323e-110	2.775e-106	1.388e-106	1.244e-105	166	485	DPF1,MAP1B,MAP2,MAP6,MAPT,APC2,SCD5,KCNIP1,RTN1,SLITRK1,ADD2,TMEM196,SCAMP5,SCN2A,SCN3A,PIP4K2B,ACTL6B,SVOP,HPCAL4,PDZD4,PSD2,DPP10,ANK2,SYT3,PPFIA2,SH3GL3,PPM1E,APC,APLP1,SLC1A2,RUFY3,TMEFF1,SLC8A2,TRIM67,NAPB,CADPS,SCG3,TAGLN3,DDX25,MAST1,SNAP25,SNCB,ATP1A3,SAMD14,PHYHIPL,FAIM2,SCN3B,MYT1L,CADM3,NOL4,GAD2,ATP6V1G2,JPH4,LHFPL4,GAP43,TTC9B,BEX1,SRRM4,NAP1L5,FXYD7,DNER,NAP1L3,NCAM1,CLASP2,GDI1,CDK…
Coexpression Atlas	54Dp_Top_500_Cluster_0	54Dp_Top_500_Cluster_0	Brain Map - Allen iN	6.323e-110	2.775e-106	1.388e-106	1.244e-105	166	485	DPF1,MAP1B,MAP2,MAP6,MAPT,APC2,SCD5,KCNIP1,RTN1,SLITRK1,ADD2,TMEM196,SCAMP5,SCN2A,SCN3A,PIP4K2B,ACTL6B,SVOP,HPCAL4,PDZD4,PSD2,DPP10,ANK2,SYT3,PPFIA2,SH3GL3,PPM1E,APC,APLP1,SLC1A2,RUFY3,TMEFF1,SLC8A2,TRIM67,NAPB,CADPS,SCG3,TAGLN3,DDX25,MAST1,SNAP25,SNCB,ATP1A3,SAMD14,PHYHIPL,FAIM2,SCN3B,MYT1L,CADM3,NOL4,GAD2,ATP6V1G2,JPH4,LHFPL4,GAP43,TTC9B,BEX1,SRRM4,NAP1L5,FXYD7,DNER,NAP1L3,NCAM1,CLASP2,GDI1,CDK…
Coexpression Atlas	80Dp_Top_500_All	80Dp_Top_500_All	Brain Map - Allen iN	4.629e-80	2.032e-76	6.773e-77	6.071e-76	140	491	MAPT,CSMD3,RTN1,DSCAML1,SLITRK1,SLC12A5,CACNG2,SCAMP5,SCN2A,SCN3A,ACTL6B,SVOP,ELMOD1,HPCAL4,PDZD4,ANK2,PPFIA2,APC,SLC1A2,SLC7A14,ARHGDIG,NAPB,SCG3,TAGLN3,PNMA2,MAST1,SNAP25,TMEM151A,SNCB,ATP1A3,PHYHIPL,FAIM2,RFPL1S,SCN3B,MYT1L,GABRG2,GAD1,NOL4,GAD2,ATP6V1G2,JPH4,GAP43,TTC9B,BEX1,SRRM4,NAP1L5,MCF2L2,FXYD7,DNER,NAP1L3,NCAM1,C11orf87,CLASP2,LANCL2,NCDN,CDK5R1,RUNDC3A,GLRA2,VAMP2,VWC2L,SYN1,SYP,SYT4,…
Coexpression Atlas	gudmap_dev lower uro neuro_e14.5_BladdPelvicGanglion_Sox10_1000	dev lower uro neuro_e14.5_BladdPelvicGanglion_Sox10_top-relative-expression-ranked_1000	Gudmap Mouse ST 1.0	1.828e-74	8.025e-71	2.006e-71	1.798e-70	173	849	GJD2,SYN3,MAP1B,MAP2,MAP6,MAPT,APC2,CEND1,SOX8,CSMD3,NDRG2,REEP2,RTN1,ADCYAP1R1,ADD2,FABP7,PNMA8B,CACNG3,S100B,CORO2B,SCN2A,SCN3A,FAM19A1,ACTL6B,TAGLN2,PCDH10,ANK2,PPFIA2,CNIH2,SH3GL3,APBA2,APBB1,DPYSL4,APLP1,CNKSR2,VAT1L,RAB6B,SLC7A14,RUFY3,ARHGDIG,CADPS,ASCL1,SCG3,TAGLN3,CXXC4,DDX25,MAST1,ASTN1,SNAP25,ATP1A3,PHYHIPL,UNC13A,UNC80,SCN3B,B3GALT1,CADM3,KIF1A,GAP43,TTC9B,SRRM4,MYT1,NAP1L5,NCAM1,NCAM…
Coexpression Atlas	gudmap_dev lower uro neuro_e14.5_BladdPelvicGanglion_Sox10_500	dev lower uro neuro_e14.5_BladdPelvicGanglion_Sox10_top-relative-expression-ranked_500	Gudmap Mouse ST 1.0	7.347e-69	3.224e-65	6.449e-66	5.781e-65	123	441	GJD2,MAP1B,MAP2,MAP6,CEND1,CSMD3,RTN1,ADCYAP1R1,FABP7,CACNG3,S100B,CORO2B,SCN2A,SCN3A,FAM19A1,TAGLN2,PCDH10,ANK2,PPFIA2,SH3GL3,APBA2,APBB1,APLP1,CNKSR2,VAT1L,RAB6B,SLC7A14,RUFY3,ARHGDIG,CADPS,ASCL1,SCG3,TAGLN3,DDX25,SNAP25,ATP1A3,PHYHIPL,UNC13A,SCN3B,B3GALT1,KIF1A,GAP43,TTC9B,SRRM4,MYT1,NAP1L5,NCAM1,NCAM2,C1QL1,RUNDC3A,SLITRK2,SYT11,SYN1,SYP,MLLT11,DCLK2,GNAO1,GNG3,NOVA1,GPR17,NRCAM,ESYT1,NTRK3,S…
Coexpression Atlas	PCBC_EB_1000	Progenitor-Cell-Biology-Consortium_EmbryoidBody_top-relative-expression-ranked_1000	PCBC	1.978e-66	8.679e-63	1.447e-63	1.297e-62	177	997	MAP6,MAPT,APC2,KCNIP1,LRP1B,RTN1,SLITRK1,GALNT13,FABP7,S100B,SPSB4,ACTL6B,SVOP,HPCAL4,PHF21B,C1orf61,PDZD4,PSD2,DPP10,SYT3,PPM1E,LRRC4C,SLC6A1,LRRC55,SLC8A2,SLC8A3,DACH2,ASCL1,SCG3,CSPG5,SLIT1,TAGLN3,DLL3,CXXC4,SLC17A8,SORCS3,B3GAT1,SNAP25,TMEM151A,ANKFN1,PHYHIPL,FAIM2,MYT1L,SOX1,SOX3,ILDR2,SOX11,ENKUR,ARPP21,NKX6-2,SALL3,KIF1A,GAP43,TTC9B,SRRM4,MYT1,CPLX2,FXYD7,DNER,HAPLN4,NCAM1,CYP46A1,RUNDC3A,…
Coexpression Atlas	26Dp_SubClass_26Dp_4_Top_500_All	26Dp_SubClass_26Dp_4_Top_500_All	Brain Map - Allen iN	1.509e-65	6.621e-62	9.459e-63	8.479e-62	126	494	KCNH7,MAPT,USP11,CSMD3,ADCY2,REEP2,RTN1,SLC22A17,SLITRK1,ADD2,PNMA8B,SCN2A,SCN3A,ACTL6B,SVOP,AMPH,PPFIA2,SH3GL2,APBA2,APBB1,DPYSL4,APLP1,VAT1L,SLC6A1,TMEFF1,ARHGDIG,NAPB,SLIT1,TAGLN3,EFR3B,MAST1,ASTN1,SNAP25,TBR1,ATP1A3,SAMD14,MYO16,GABBR1,SCN3B,CADM3,KIF1A,GAP43,MYT1,DNER,FXYD6,NAP1L3,NCAM1,CLASP2,GPR162,GDI1,NACAD,RUNDC3A,SYT11,VAMP2,ARC,SYN1,SYP,SYT5,GNG3,TSPYL4,GPM6A,CACNA1E,GPR6,RALYL,BRSK2,…
Coexpression Atlas	gudmap_dev lower uro neuro_e15.5_BladdPelvicGanglion_Sox10_1000	dev lower uro neuro_e15.5_BladdPelvicGanglion_Sox10_top-relative-expression-ranked_1000	Gudmap Mouse ST 1.0	2.647e-63	1.162e-59	1.452e-60	1.302e-59	158	830	GJD2,MAP1B,MAP2,MAP6,MAPT,APC2,CEND1,CSMD3,NDRG2,REEP2,RTN1,STX1B,ADCYAP1R1,ADD2,FABP7,PNMA8B,CACNG3,S100B,CORO2B,SCN2A,SCN3A,FAM19A1,TAGLN2,ALDOC,PCDH10,ANK2,PPFIA2,APBA2,APBB1,DPYSL4,APLP1,CNKSR2,VAT1L,RAB6B,SLC7A14,RUFY3,ARHGDIG,TRIM67,CADPS,ASCL1,SCG3,TAGLN3,CXXC4,DDX25,MAST1,ASTN1,SNAP25,ATP1A3,BRSK1,PHYHIPL,UNC13A,SCN3B,B3GALT1,CADM3,KIF1A,GAP43,TTC9B,BEX1,SRRM4,MYT1,KIF1B,NAP1L5,NAP1L3,NCA…
Coexpression Atlas	neurons_Top_500_All	neurons_Top_500_All	Brain Map - Barres	1.067e-61	4.685e-58	5.206e-59	4.666e-58	122	494	MAP1A,USP11,KCNIP2,CSMD3,ADARB2,ADCY2,RTN1,SLC22A17,SLC12A5,CACNG3,CACNG2,GPR158,SCAMP5,SCN1A,SCN2A,ALDOC,SVOP,HPCAL4,AMPH,RAB6B,SLC7A14,RPH3A,SLC6A1,NAPB,CADPS,TAGLN3,PNMA2,SNAP25,SNCB,ATP1A3,FAIM2,ATP2B2,ATP2B3,UNC13A,UNC80,RFPL1S,SCN3B,GABRA1,GABRA4,MYT1L,GABRG2,GAD1,GAD2,JPH4,KIF1A,BEX1,SRRM4,NAP1L5,TCEAL5,CPLX2,FXYD6,NAP1L3,GPR162,NCDN,VAMP2,ARHGEF9,SYN1,SYN2,SYP,GNG3,CACNA1A,CAMK2A,VSTM2A,G…
Coexpression Atlas	pyramidal SS Subclass S1PyrL23	pyramidal SS Subclass S1PyrL23	BrainMap - Mouse Adult Brain - Linnarsson	1.48e-61	6.494e-58	6.494e-59	5.822e-58	119	469	CEND1,TMEM132B,RTN1,SNN,ADD2,SLC12A5,PNMA8B,CACNG3,CACNG2,SCAMP5,SCN1A,SCN2A,FAM19A1,ELMOD1,HPCAL4,AGAP2,DPP10,PPFIA2,APBA2,CNKSR2,LRRC4C,CPNE5,RAB6B,SLC1A2,SLC8A2,CADPS,TAGLN3,FUT9,EFR3B,SNAP25,SNCB,ATP2B2,UNC13A,GABRA1,GABRA4,ILDR2,NOL4,JPH4,ARPP21,BEX1,TCEAL5,CPLX2,DDN,C11orf87,CYP46A1,LANCL2,NCDN,CDK5R1,ARHGEF9,SYN1,SYP,SYT4,BSN,GNG3,CDK5R2,CACNA1A,GPR22,NRCAM,CAMK2A,NTRK3,C8orf46,GRIA3,GRIN1…
Computational	M3373 GNF2_DNM1	Neighborhood of DNM1	MSigDb: C4 - CGN: Cancer Gene Neighborhood (v6.0)	1.305e-38	7.855e-36	7.855e-36	5.482e-35	44	73	MAP1A,MAPT,SLC22A17,SLC12A5,CORO2B,AMPH,SH3GL2,RAB6B,SLC1A3,RPH3A,TAGLN3,PNMA2,SNAP25,SNCB,FAIM2,ATP2B2,GABRA1,ATP6V1G2,GAP43,FXYD7,NAP1L3,GDI1,RUNDC3A,SYT11,VAMP2,ARHGEF9,SYN1,BSN,GNG3,CAMK2A,RALYL,TSPAN7,CHN1,GABBR2,CLIP3,CTNND2,NDRG4,SNAP91,SV2A,SLC17A7,KCNQ2,KIF5C,RAB3A,RGS7
Computational	M10137 GNF2_RTN1	Neighborhood of RTN1	MSigDb: C4 - CGN: Cancer Gene Neighborhood (v6.0)	2.129e-33	1.282e-30	6.408e-31	4.471e-30	35	52	MAPT,RTN1,ANK2,CSPG5,ASTN1,RFPL1S,SCN3B,MYT1L,GAD1,GAP43,KIF1B,FXYD6,NAP1L3,GDI1,CDK5R1,MLLT11,GNAO1,GPM6A,RALYL,INA,NRXN1,NRXN2,GABBR2,CLIP3,NCAN,CTNND2,FAM131B,DNAJC6,C14orf132,STMN4,SNAP91,KCNQ2,KIF3C,KIF5C,RGS7
Computational	M15730 MODULE_11	Genes in the cancer module 11.	MSigDb: C4 - CM: Cancer Modules (v6.0)	1.118e-32	6.728e-30	2.243e-30	1.565e-29	102	540	MAP2,MAPT,APC2,MBP,RREB1,RTN1,FABP7,CACNG3,S100B,SCAMP5,ACTL6B,FOXG1,AMPH,SH3GL3,APBA2,APBB1,DPYSL4,APLP1,AQP4,SLC1A3,RPH3A,RASL10A,ARHGDIG,CSPG5,SLIT1,TAGLN3,SNAP25,SNCB,TBR1,ATP1B2,ATP2B2,GABBR1,GABRG2,GAD1,GAD2,ATP6V1G2,GAP43,KIF1B,WASF3,NAP1L3,NCAM1,GFAP,RUNDC3A,MLC1,ABCC8,ARC,SYT5,MLLT11,GNAO1,BSN,TSPYL4,NOVA1,NOVA2,CACNA1A,GPM6A,ACSL6,NPTX1,STMN2,GRIA2,GRIK5,GRIN1,OMG,CCK,KIF3A,THRA,FAM107A…
Computational	M12065 MODULE_66	Genes in the cancer module 66.	MSigDb: C4 - CM: Cancer Modules (v6.0)	3.931e-31	2.366e-28	5.916e-29	4.128e-28	101	552	MAP2,MAPT,APC2,MBP,RTN1,FABP7,CACNG3,S100B,SCAMP5,ACTL6B,FOXG1,AMPH,SH3GL3,APBA2,APBB1,DPYSL4,APLP1,AQP4,SLC1A3,RPH3A,RASL10A,ARHGDIG,CSPG5,SLIT1,TAGLN3,SNAP25,SNCB,TBR1,ATP1B2,ATP2B2,GABBR1,GABRG2,GAD1,ATP6V1G2,GAP43,WASF3,NAP1L3,NCAM1,GFAP,RUNDC3A,MLC1,ABCC8,ARC,SYT5,MLLT11,GNAO1,TSPYL4,NOVA1,NOVA2,CACNA1A,GPM6A,ACSL6,NPTX1,STMN2,GRIA2,GRIK1,GRIK5,GRIN1,OMG,CCK,KIF3A,THRA,FAM107A,TSPAN7,PAX6,PC…
Computational	M19344 MODULE_100	Genes in the cancer module 100.	MSigDb: C4 - CM: Cancer Modules (v6.0)	5.49e-31	3.305e-28	6.61e-29	4.612e-28	100	544	MAP2,MAPT,APC2,MBP,RTN1,FABP7,CACNG3,S100B,SCAMP5,ACTL6B,FOXG1,AMPH,SH3GL3,APBA2,APBB1,DPYSL4,APLP1,AQP4,SLC1A3,RPH3A,RASL10A,ARHGDIG,CSPG5,SLIT1,TAGLN3,SNAP25,SNCB,TBR1,ATP1B2,ATP2B2,GABBR1,GABRG2,GAD1,ATP6V1G2,GAP43,WASF3,NAP1L3,NCAM1,RUNDC3A,MLC1,ABCC8,ARC,SYT5,MLLT11,GNAO1,TSPYL4,NOVA1,NOVA2,CACNA1A,GPM6A,ACSL6,NPTX1,STMN2,GRIA2,GRIK1,GRIK5,GRIN1,OMG,CCK,KIF3A,THRA,FAM107A,TSPAN7,PAX6,PCDH9,C…
Computational	M2519 MODULE_137	CNS genes.	MSigDb: C4 - CM: Cancer Modules (v6.0)	3.702e-30	2.229e-27	3.714e-28	2.592e-27	99	546	MAP2,MAPT,APC2,MBP,RTN1,FABP7,CACNG3,S100B,SCAMP5,ACTL6B,FOXG1,AMPH,SH3GL3,APBA2,APBB1,DPYSL4,APLP1,AQP4,SLC1A3,RPH3A,RASL10A,ARHGDIG,ASCL1,CSPG5,SLIT1,TAGLN3,SNAP25,SNCB,TBR1,ATP1B2,ATP2B2,GABBR1,GABRG2,GAD1,ATP6V1G2,GAP43,WASF3,NAP1L3,NCAM1,RUNDC3A,MLC1,ABCC8,ARC,SYT5,MLLT11,GNAO1,TSPYL4,NOVA1,NOVA2,CACNA1A,GPM6A,ACSL6,NPTX1,STMN2,GRIA2,GRIK1,GRIK5,GRIN1,OMG,CCK,KIF3A,THRA,FAM107A,TSPAN7,PAX6,P…
Computational	M15601 GNF2_RAB3A	Neighborhood of RAB3A	MSigDb: C4 - CGN: Cancer Gene Neighborhood (v6.0)	1.583e-27	9.527e-25	1.361e-25	9.498e-25	27	37	SLC12A5,SH3GL2,RAB6B,TAGLN3,FAIM2,GABBR1,GAP43,FXYD7,GDI1,RUNDC3A,SYT11,VAMP2,ARHGEF9,SYN1,NRCAM,RALYL,GRM3,GABBR2,NDRG4,SNAP91,SV2A,KCNQ2,KIF3C,KIF5C,RAB3A,DPP6,RGS7
Computational	M8546 GNF2_MAPT	Neighborhood of MAPT	MSigDb: C4 - CGN: Cancer Gene Neighborhood (v6.0)	3.373e-27	2.031e-24	2.538e-25	1.771e-24	28	41	MAPT,RTN1,ANK2,SH3GL2,RAB6B,SLC1A3,PNMA2,SNCB,SCN3B,GAP43,KIF1B,FXYD7,NAP1L3,RUNDC3A,SYN1,GNAO1,GPM6A,RALYL,GRIA2,NRXN1,GABBR2,CLIP3,SNAP91,SV2A,KCNQ2,KIF5C,RGS7,ELAVL4
Computational	M15252 GCM_MAPK10	Neighborhood of MAPK10	MSigDb: C4 - CGN: Cancer Gene Neighborhood (v6.0)	2.707e-25	1.63e-22	1.811e-23	1.264e-22	36	82	MBP,IL17D,SCD5,NDRG2,SCAMP5,FGF1,ALDOC,APLP1,CNKSR2,RAB6B,SLC1A3,ATP1A2,GABBR1,AHCYL1,BBS2,SYT11,GPM6B,CAMK2A,FAM107A,TMOD2,PLEKHB1,SLAIN1,FAM19A5,PLP1,CLDND1,FAM171B,CLIP3,FEZ1,DNM3,CTNND2,NRSN1,DNAJC6,SNAP91,KCNJ10,DTNA,TTYH2
Computational	M3849 GNF2_AF1Q	Neighborhood of AF1Q	MSigDb: C4 - CGN: Cancer Gene Neighborhood (v6.0)	1.514e-18	9.116e-16	9.116e-17	6.361e-16	18	25	RTN1,ANK2,CSPG5,ASTN1,MYT1L,GAD1,GAP43,MLLT11,GNAO1,GPM6A,RALYL,STMN2,INA,CLIP3,NCAN,STMN4,KIF3C,KIF5C
MicroRNA	hsa-miR-218:TargetScan	hsa-miR-218:TargetScan	TargetScan	3.856e-16	1.232e-12	1.232e-12	1.065e-11	81	698	MCF2,RTN3,CSMD3,TMEM132B,ADCY2,GALNT13,SLC24A4,TMEM184A,SCAMP5,CASKIN1,KCNT1,PDZD4,PSD2,KIAA1522,PEX5L,SLC1A2,ARF6,SLC6A1,LRRC55,SKAP1,FUT9,B3GAT1,TMEM151A,SNCB,UNC13A,MYO16,MYT1L,SOX11,WASF3,GDI1,C3orf70,BSN,GNG3,TCF12,NEUROD4,C8orf46,GRIA2,GRIA4,GRIK2,GRIK3,GRM1,GPR137C,GPR45,RTP1,GPR85,NRXN1,SLAIN1,ST8SIA5,RBM47,PURG,FAT3,SLC35F1,TRIM9,NCAN,ERC2,CTNNA2,CTNND2,ST18,NDRG4,SCRT2,SCRT1,FRMPD4,RASS…
MicroRNA	hsa-miR-570:PITA	hsa-miR-570:PITA_TOP	PITA	3.11e-10	9.935e-07	4.967e-07	4.295e-06	88	1016	KCNH7,MAP1B,MAP2,ETV1,RTN3,LRP1B,SLITRK1,CACNG3,CORO2B,ELMOD1,SLC9A6,AMPH,DPP10,PPM1E,SLITRK3,PEX5L,AQP4,SLC1A2,ARF6,TMEFF1,TRIM67,TIFA,PHYHIPL,ATP2B2,MYT1L,SOX1,NOL4,MYH9,SALL3,MYT1,NAP1L5,NCAM1,CLASP2,MSTN,SYNGAP1,SYT11,PCDH11X,C3orf70,TSPYL4,GPM6A,VWC2,LRIT2,TCF12,CAMK2A,HCN1,LHFPL3,RALYL,GRIA3,GRM1,TERF2,GPR137C,SYNGR2,PAWR,HRH3,SEZ6L,CHN1,TERF2IP,NRXN1,QKI,AKAP6,FNDC3B,FAT3,IGDCC3,SLC35F1,ZI…
MicroRNA	hsa-miR-218:PITA	hsa-miR-218:PITA_TOP	PITA	8.863e-10	2.831e-06	9.436e-07	8.159e-06	54	506	MCF2,RTN3,CSMD3,LRP1B,TMEM132B,GALNT13,SLC24A4,SCN1A,CASKIN1,SCN2A,KIAA1522,PEX5L,SLC1A2,ARF6,SLC6A1,SKAP1,FUT9,B3GAT1,TMEM151A,UNC13A,MYO16,MYT1L,SOX11,BCL3,C3orf70,GNAO1,GNG3,GPM6A,TCF12,GRIA2,GRIA4,GRIK2,GRIK3,GRM1,GPR137C,PCDH8,NRXN1,RBM47,CNP,FAT3,SLC35F1,TRIM9,ERC2,CTNND2,ST18,SCRT2,FRMPD4,DCX,CADM2,MAGI2,PTPRA,SV2A,DLG2,SLC17A6
MicroRNA	hsa-miR-137:TargetScan	hsa-miR-137:TargetScan	TargetScan	1.958e-09	6.255e-06	1.564e-06	1.352e-05	76	857	SYN3,CSMD3,TMEM132B,ADCY2,DSCAML1,SNN,STX1B,SLC12A5,TMEM184A,GPR158,SCN1A,SCN2A,LRRTM4,ARF6,SLC6A1,TRIM67,CADPS,MEGF11,GABRA1,B3GALT2,SOX11,AHCYL1,MYO1C,FXYD6,SRPRA,CLASP2,NEUROD1,NEUROD2,MLC1,SYN2,LUZP2,DCLK2,BSN,NOVA1,KDELR3,ACSL6,TCF12,NEUROD4,CAMK2A,ZBTB47,GRIA1,GRIA4,OPCML,PTPN5,ENHO,PCDH9,CD2AP,HAPLN2,FAM19A5,QKI,MGAT5B,IGLON5,AP1S3,STXBP5L,FAT3,ZDHHC5,GABBR2,LRRN3,ST18,SCRT2,SCRT1,IMPA2,ZN…
MicroRNA	hsa-miR-1285:PITA	hsa-miR-1285:PITA_TOP	PITA	3.365e-09	1.075e-05	2.011e-06	1.739e-05	31	214	MAP1A,MCF2,CSMD2,NLGN2,AGAP2,SEMA3F,ARF6,GABRA5,JPH4,LDLRAD2,LHFPL4,CPLX2,SRPRA,RUNDC3A,TTBK1,VAMP2,PCDH11X,TCF12,THRA,GDAP1L1,FAT3,NXPH1,PPP2R2B,ERC2,KCTD4,LRRTM3,KCNB1,FAM120C,DLG2,DPYSL2,ZBTB7B
MicroRNA	hsa-miR-539:PITA	hsa-miR-539:PITA_TOP	PITA	3.778e-09	1.207e-05	2.011e-06	1.739e-05	51	483	KCNH7,MAP1B,MAP2,ETV1,DSCAML1,ERMN,ELMOD1,SLC9A6,AMPH,PPM1E,FYN,MEGF11,UNC13A,SOX11,TCEAL5,DNER,NCAM1,CLASP2,SYNGAP1,SLITRK2,PCDH11X,SYN1,NKX2-2,GNAO1,BSN,GPM6A,NPTX1,TCF12,HCN1,GRIA2,GRIA3,GRM1,CELF3,NLGN3,NALCN,CNR1,CNTFR,GABBR2,FRMPD4,ZNF217,DCX,CADM2,OLFM3,KCND2,FAM120C,SCG2,KBTBD6,PRRT2,POLR1D,SFXN5,EPHB1
MicroRNA	hsa-miR-1207-5p:PITA	hsa-miR-1207-5p:PITA_TOP	PITA	5.24e-09	1.674e-05	2.391e-06	2.067e-05	27	171	NLGN2,HPCAL4,SEMA3F,SYT3,CNTNAP1,YPEL4,SORCS3,ATP1B2,LDLRAD2,CPLX2,BCL3,NCDN,SYNGAP1,VAMP2,SYP,STMN2,TEAD3,PLEKHB1,DLGAP3,VASP,TNPO2,ZIC3,FAM120C,TMEM145,SLC17A7,CAMK2N2,TMEM132E
MicroRNA	hsa-miR-612:PITA	hsa-miR-612:PITA_TOP	PITA	1.305e-08	4.17e-05	5.212e-06	4.507e-05	30	214	MAP1A,MCF2,CSMD2,NLGN2,AGAP2,SEMA3F,ARF6,GABRA5,JPH4,LDLRAD2,LHFPL4,CPLX2,SRPRA,RUNDC3A,TTBK1,VAMP2,PCDH11X,TCF12,THRA,GDAP1L1,NXPH1,PPP2R2B,ERC2,KCTD4,LRRTM3,KCNB1,FAM120C,DLG2,DPYSL2,ZBTB7B
MicroRNA	hsa-miR-34a:TargetScan	hsa-miR-34a:TargetScan	TargetScan	7.753e-08	0.0002476	2.064e-05	0.0001784	47	469	KCNH7,MAP1A,EHD4,GPR158,SCN1A,SVOP,ELMOD1,FOXG1,AGAP2,CNTNAP1,DPYSL4,LRRC55,TRIM67,FUT9,ATP1A2,PEA15,MYH9,MYO1C,CPLX2,SRPRA,NCDN,VAMP2,C3orf70,SYN2,CNTN2,CACNA1E,TCF12,GPR22,GRID1,INA,FAM107A,CELF3,LGI1,CADM4,GPR85,NRXN2,MGAT5B,AKAP6,FNDC3B,FAT3,GABBR2,LRRTM2,CTNND2,DCX,CALN1,ST8SIA3,JPH3
MicroRNA	hsa-miR-449b:TargetScan	hsa-miR-449b:TargetScan	TargetScan	7.753e-08	0.0002476	2.064e-05	0.0001784	47	469	KCNH7,MAP1A,EHD4,GPR158,SCN1A,SVOP,ELMOD1,FOXG1,AGAP2,CNTNAP1,DPYSL4,LRRC55,TRIM67,FUT9,ATP1A2,PEA15,MYH9,MYO1C,CPLX2,SRPRA,NCDN,VAMP2,C3orf70,SYN2,CNTN2,CACNA1E,TCF12,GPR22,GRID1,INA,FAM107A,CELF3,LGI1,CADM4,GPR85,NRXN2,MGAT5B,AKAP6,FNDC3B,FAT3,GABBR2,LRRTM2,CTNND2,DCX,CALN1,ST8SIA3,JPH3
Drug	CID000161645	oriens	Stitch	1.417e-33	4.252e-29	4.252e-29	4.628e-28	51	154	KCNH7,GJD2,MAP1B,MAP2,DPYSL4,BCAN,SLC6A1,SLC8A2,SNAP25,GABRA1,GABRA4,GABRA5,GABRG1,GABRG2,GAD1,GAD2,GAP43,GFAP,ARC,SYN1,SYN2,SYP,NTRK3,STMN2,GRIA1,GRIA2,GRIA3,GRIA4,GRIK1,GRIK4,GRIK5,GRIN2C,GRM1,TECTA,GRM3,GRM5,CCK,SYNPR,CHRNA4,GABBR2,SLC32A1,NCAN,PRKCG,KCNA6,KCNC1,PTPRZ1,KCNJ9,SLC17A7,RAB3A,RGS7,LSAMP
Drug	D003042	Cocaine	CTD	9.977e-29	2.993e-24	1.496e-24	1.629e-23	140	1300	GJD2,SYN3,MAP1A,MAP1B,MAP2,MAP6,MBP,ACTN2,NDRG2,ADCY2,SLITRK1,ADCY8,STX1B,PNMA8B,S100B,SLC24A4,GPC5,KCNT1,HPCAL4,MOBP,AGAP2,SEMA3F,SYT3,CNKSR2,PEX5L,SLC1A2,CSPG5,TAGLN3,SLC17A8,SORCS3,SNCB,ATP1A3,ATP1B2,FAIM2,GABBR1,GABRA1,GABRB1,GABRG2,GAD1,GAD2,MYH7,MYH9,ARPP21,GAP43,HCN2,GFAP,KIRREL3,CDK5R1,SYT11,NFKB2,ARC,SYN1,SYN2,SYP,SYT4,SYT5,NKX2-2,GNAO1,GPM6A,GPM6B,NPPA,CAMK2A,CASP4,CASP8,GRIA1,GRIA2,GRI…
Drug	CID000004376	N-methyl-DL-aspartic acid	Stitch	9.234e-28	2.77e-23	9.232e-24	1.005e-22	93	655	GJD2,MAP1B,MAP2,ADCY8,SLC12A5,CACNG3,CACNG2,LRFN2,SCNN1A,AGAP2,SYT3,APBA2,APLP1,SLC1A2,SLC1A3,RPH3A,B3GAT1,FYN,SCN3B,GABRA1,GABRA4,GABRA5,GABRB1,GABRG1,GABRG2,GAD1,GAD2,NCAM1,GFAP,SYNGAP1,NTNG2,TTBK1,GLRA2,NFKB2,ARC,SYN2,SYP,BSN,CACNA1A,CACNA1E,CAMK2A,NTRK3,STMN2,CASP8,GRIA1,GRIA2,GRIA3,GRIA4,GRID1,GRID2,GRIK1,GRIK2,GRIK3,GRIK4,GRIK5,GRIN1,GRIN2C,GRM1,TECTA,GRM3,GRM5,CCK,DLGAP1,PDYN,CHRNA4,CHRNB2…
Drug	CID000002910	cyclothiazide	Stitch	7.445e-24	2.233e-19	5.583e-20	6.077e-19	35	103	MBP,CACNG3,CACNG2,SLC1A2,SLC1A3,SLC8A2,GABRA1,GABRA4,GABRA5,GABRB1,GABRG1,GABRG2,GFAP,GLRA2,CACNA1A,GRIA1,GRIA2,GRIA3,GRIA4,GRID1,GRID2,GRIK1,GRIK2,GRIK3,GRIK4,GRIK5,GRIN2C,GRM1,GRM3,GRM5,SLC24A2,GABBR2,NCAN,PTPRZ1,SLC17A7
Drug	CID000000119	gamma-aminobutyric acid	Stitch	2.103e-23	6.308e-19	1.262e-19	1.373e-18	72	474	GJD2,MAP2,MAPT,SLC12A5,CACNG2,NLGN2,AMPH,SLC1A2,SLC1A3,SLC6A1,ASCL1,SLC17A8,B3GAT1,SNAP25,GABBR1,GABRA1,GABRA4,GABRA5,GABRB1,GABRG1,GABRG2,GAD1,GAD2,KIF1A,GFAP,GLRA2,VAMP2,SYN1,SYN2,SYP,BSN,CNDP1,CACNA1A,CACNA1E,NPPA,GRIA1,GRIA2,GRIA3,GRIA4,GRIK1,GRIK2,GRIK3,GRIK4,GRIK5,GRIN1,GRIN2C,GRM1,GRM3,GRM5,CCK,PDYN,GABARAPL2,SYNPR,CHRNA4,CHRNB2,CLCN6,CLIC1,CNR1,HTR1A,GABBR2,SLC32A1,STMN4,KCNA1,SV2A,SCG2,S…
Drug	CID000020382	tetradotoxin	Stitch	2.783e-23	8.347e-19	1.391e-19	1.514e-18	68	428	ADCYAP1R1,SLC12A5,S100A4,S100B,SCN2A,SCN3A,SCNN1A,ANXA2,SLC6A1,B3GAT1,ATP1A2,ATP1A3,SCN3B,GABRA1,GABRA4,GABRA5,GABRB1,GABRG1,GABRG2,GAD1,GAD2,NKX6-2,GALR1,GLRA2,SYN2,SYP,BSN,CACNA1A,CACNA1E,NPPA,HCN1,STMN2,GRIA1,GRIA2,GRIA3,GRIA4,GRID2,GRIK1,GRIK2,GRIK3,GRIK4,GRIK5,GRIN2C,GRM1,GRM3,GRM5,CCK,INA,P2RX6,HRH3,PDYN,NTSR2,CHRNA4,CHRNB2,CNR1,PRKD2,HTR1A,HTR5A,P2RY12,GABBR2,PRKCG,KCNA1,KCNA2,KCNA6,KCND2,…
Drug	C038939	enzacamene	CTD	3.223e-22	9.669e-18	1.381e-18	1.504e-17	37	129	STX1B,CACNG2,HES6,SLC1A2,SLC1A3,SLIT1,FYN,GABRA4,GABRB1,SYNGAP1,SYP,BSN,CACNA1A,CACNA1E,NRCAM,NTRK3,SYT6,STMN2,GRIA2,GRIA4,GRIK2,GRIK4,GRIK5,GRIN1,GRIN2C,IL1RAPL1,DLGAP3,NRXN1,NRXN2,MDGA2,DCC,MAGI2,SLC17A7,DLG4,SHANK1,DPP6,CACNG8
Drug	C118580	octylmethoxycinnamate	CTD	5.83e-22	1.749e-17	2.186e-18	2.38e-17	37	131	STX1B,CACNG2,HES6,SLC1A2,SLC1A3,SLIT1,FYN,GABRA4,GABRB1,SYNGAP1,SYP,BSN,CACNA1A,CACNA1E,NRCAM,NTRK3,SYT6,STMN2,GRIA2,GRIA4,GRIK2,GRIK4,GRIK5,GRIN1,GRIN2C,IL1RAPL1,DLGAP3,NRXN1,NRXN2,MDGA2,DCC,MAGI2,SLC17A7,DLG4,SHANK1,DPP6,CACNG8
Drug	C029790	2,2',3',4,4',5-hexachlorobiphenyl	CTD	1.33e-21	3.989e-17	4.433e-18	4.825e-17	155	1797	MAG,MAP1B,MAP6,ADM2,APC2,MBP,ETV1,IL17D,CSMD3,RTN1,DSCAML1,STX1B,SLC12A5,S100A11,S100B,SALL2,SNX32,SCN1A,SCNN1A,CRB3,FGF1,GPC5,ALDOC,HPCAL4,MOBP,MOG,AGAP2,CHMP4C,AMPH,DPP10,SH3GL2,PPM1E,PEX5L,SLC1A3,LRRC55,PNMA2,B3GAT1,SNAP25,TBR1,ATP1A2,ATP1A3,FAIM2,ATP2B2,ATP2B3,UNC80,SOX11,NOL4,ATP6V1G2,GALR1,SPINT1,SRRM4,MYT1,KIF1B,NAP1L5,WASF3,NCAM1,GDI1,CYP46A1,GPR75,VAMP2,PCDH11X,VWC2L,INSM2,FAM160A1,CNTN2…
Drug	CID000001727	4-AP	Stitch	3.079e-21	9.235e-17	9.235e-18	1.005e-16	50	258	GJD2,KCNIP2,SCNN1A,KCNK5,ATP1A2,ATP1A3,SCN3B,GABRA1,GABRA4,GABRA5,GABRG1,GABRG2,GAP43,SYN1,SYN2,SYP,CACNA1A,CACNA1E,GRIA1,GRIA2,GRIA3,GRIA4,GRIK1,GRIK3,GRIK4,GRIK5,GRIN2C,GRM1,GRM3,GRM5,PRKD2,HTR1A,GABBR2,PRKCG,IL2RB,TES,KCNK4,KCNA1,KCNA2,KCNA6,KCNB1,KCNC1,KCND2,KCNF1,KCNJ4,KCNJ9,KCNJ10,KCNN1,KCNQ2,RAB3A
Disease	C0036341	Schizophrenia	DisGeNET Curated	4.29e-33	2.309e-29	2.309e-29	2.116e-28	170	1561	MAG,GJD2,SYN3,MAP2,MAP6,MBP,RTN3,CD46,CSMD2,LRP1B,ADCYAP1R1,SLC12A5,FABP7,CACNG2,S100A11,S100B,SCN2A,NLGN2,MOBP,MOG,APBA2,APC,BCAN,APOL1,AQP4,SLC1A2,SLC1A3,SLC6A1,ASCL1,CSPG5,CTNNA3,KCNK5,ASTN1,B3GAT1,SNAP25,SNCB,FYN,MCTP2,PEA15,MYO16,GABBR1,GABRA1,GABRA4,GABRA5,GABRB1,MYT1L,GABRG1,GABRG2,GAD1,GAD2,MYH9,GAP43,MCHR2,CPLX2,FXYD6,HAPLN4,NPAS3,NCAM1,NDP,GFAP,SYNGAP1,CDK5R1,NTNG2,NEUROD1,SYT11,MLC1,GL…
Disease	C0005586	Bipolar Disorder	DisGeNET Curated	1.251e-19	6.732e-16	3.366e-16	3.086e-15	88	730	SYN3,MAP2,MAPT,ADCY2,ADCY8,ADCYAP1R1,FABP7,S100A11,S100B,DPP10,SLC1A2,SLC1A3,ASTN1,SNAP25,ATP1A2,ATP1A3,FYN,GABRA1,GABRA4,GABRA5,GABRB1,GABRG1,GAD1,GAD2,GAP43,MCHR2,CPLX2,NPAS3,NCAM1,GFAP,NTNG2,SLITRK2,MLC1,VAMP2,SYN2,SYP,GNAZ,CACNA1A,NPTX1,CAMK2A,CASP8,GRIA1,GRIA2,GRIA3,GRIA4,GRID1,GRIK1,GRIK2,GRIK3,GRIK4,GRIK5,GRIN1,GRIN2C,GRM3,GRM5,CCK,PTPN5,P2RX6,NR2E1,PAWR,TNR,SEZ6L,PDYN,TERF2IP,NRXN1,CNR1,V…
Disease	C0004352	Autistic Disorder	DisGeNET Curated	5.779e-15	3.11e-11	1.037e-11	9.503e-11	73	644	MAP2,MBP,CSMD3,SCAMP5,SCN1A,SCN2A,SCN3A,NLGN2,PCDH10,SLC9A6,FOXG1,CNTNAP1,APBA2,APC,AQP4,SLC1A2,SLC1A3,SNAP25,TBR1,ATP2B2,GABBR1,GABRA1,GABRA4,GABRA5,GABRB1,GABRG1,GAD1,GAD2,MCHR2,NCAM1,TNFRSF10A,SYNGAP1,CNTNAP5,NTNG2,SYN1,SYN2,CACNA1A,NRCAM,GRIA1,GRIA2,GRIK2,GRIK4,GRM5,OPHN1,IL1RAPL1,PAX6,PCDH9,CDH10,CHRNA4,CHRNB2,HEPACAM,NLGN3,NRXN1,PLP1,HTR5A,CLIP2,PCDH11Y,GABBR2,CTNND2,PSD,CADM2,STMN4,KCND2,F…
Disease	C0014544	Epilepsy	DisGeNET Curated	1.322e-13	7.112e-10	1.778e-10	1.63e-09	91	962	MAPT,STX1B,SLC12A5,FABP7,CACNG2,SCN1A,SCN2A,SCN3A,PCDH10,KCNT1,FOXG1,ANK2,APBA2,AQP4,SLC1A2,SLC1A3,SLC6A1,NAPB,ASCL1,TBR1,ATP1A2,ATP1A3,GABBR1,GABRA1,GABRA4,SOX3,GABRG2,SOX11,GAD1,NDP,HCN2,GFAP,SYNGAP1,MLC1,ABCC8,GLRA2,ARHGEF9,SYN1,SYN2,GNAO1,CNTN2,CACNA1A,HCN1,GRIA1,GRIA2,GRIA3,GRIK1,GRIK2,GRIN1,GRIN2C,GRM1,GRM3,OPHN1,CRB1,PTPN5,PAX6,LGI1,PDYN,CHRNA4,CHRNB2,NRXN1,CNR1,PMM2,VDR,VRK2,SLC35F1,SLC32…
Disease	C0036572	Seizures	DisGeNET Curated	7.032e-12	3.784e-08	7.568e-09	6.938e-08	88	982	MAP1B,MAPT,STX1B,SLC12A5,SCN1A,SCN2A,SCN3A,SLC9A6,FOXG1,AMPH,APBB1,SLITRK3,CNKSR2,AQP4,SLC1A2,SLC1A3,ARF6,SLC6A1,SLC8A3,MT3,ASCL1,TBR1,ATP1A2,MYO16,GABBR1,GABRA1,GABRA4,GABRA5,GABRB1,SOX3,GABRG2,SOX11,GAD1,GAD2,NCAM1,NDP,GFAP,SYNGAP1,MLC1,ABCC8,ARHGEF9,SYN1,SYN2,GNAO1,GNG3,MBD2,CNTN2,CACNA1A,HCN1,GRIA1,GRIA2,GRIA3,GRIK1,GRIK2,GRIN1,GRIN2C,GRM3,GRM5,CCK,OPHN1,CRB1,TIMP4,SEZ6L,LGI1,PDYN,CHRNA4,CHRN…
Disease	C0233514	Abnormal behavior	DisGeNET Curated	2.186e-11	1.176e-07	1.961e-08	1.797e-07	46	365	MAP6,MAPT,S100B,SCN1A,SCN2A,SNAP25,GABRA1,GABRG2,GAD2,NPAS3,NCAM1,SYN1,SYT4,GPM6A,NRCAM,GRIA1,GRIA3,GRIK2,GRIN1,GRM3,GRM5,CCK,LINGO1,NR2E1,PDYN,GPR85,CHRNA4,NLGN3,DLGAP3,CLCN6,NRXN1,QKI,CNR1,HSPG2,HTR1A,HTR5A,PCDH11Y,PPP2R2B,FEZ1,CNTNAP4,CTNND2,CELF4,PSD,DLG4,DPYSL2,OLIG2
Disease	C1510586	Autism Spectrum Disorders	DisGeNET Curated	9.167e-11	4.933e-07	7.047e-08	6.46e-07	50	436	RREB1,FABP7,SCN1A,SCN2A,FOXG1,MOG,DPP10,APBA2,APC,SNAP25,TBR1,ATP2B2,MYO16,GABRG1,GAD1,SRRM4,GDI1,GFAP,SYNGAP1,KIRREL3,CNTNAP5,SYN1,SYN2,CACNA1A,GRIK4,GRM5,IL1RAPL1,HEY1,PAX6,PCDH9,SEZ6L,NLGN3,NRXN1,NRXN2,NXPH1,POU3F2,LRRN3,CTNND2,PSD,LRRTM3,PTPRA,KCNJ10,PCDH15,DLG4,RAB39B,SHANK1,DPP6,FEZF2,PRRT2,ROM1
Disease	C0001973	Alcoholic Intoxication, Chronic	DisGeNET Curated	1.783e-10	9.594e-07	1.091e-07	9.999e-07	47	402	MBP,DSCAML1,PCDH10,MOBP,MOG,CPNE5,SLC1A2,SLC1A3,SLC6A1,TAGLN3,ASTN1,FYN,GABBR1,GABRA1,GABRA5,GABRB1,GABRG1,GABRG2,GAD1,GAD2,GALR1,GAP43,NCAM1,GFAP,NEUROD2,ARC,SYN2,CAMK2A,GRIK1,GRIK3,GRIN1,GRIN2C,GRM1,GRM3,GRM5,CCK,CDH10,CDH18,PDYN,CHRNA4,CNR1,HTR1A,CTNNA2,ST18,SERINC2,DPYSL2,RFX4
Disease	C0004936	Mental disorders	DisGeNET Curated	1.824e-10	9.816e-07	1.091e-07	9.999e-07	41	321	MAG,SLITRK1,ADCYAP1R1,S100B,SNAP25,GAD1,MYT1,NPAS3,NCAM1,GFAP,SYT4,ACSL6,NRCAM,GRIA1,GRIK4,GRIN1,GRM5,CCK,NR2E1,PAWR,PDYN,GPR85,CHRNA4,NRXN1,QKI,CNP,CNR1,HSPG2,HTR1A,HTR5A,ATCAY,PCDH11Y,PPP2R2B,FEZ1,CNTNAP4,CTNND2,PSD,DLG4,DPYSL2,RIT2,OLIG2
Disease	C0543888	Epileptic encephalopathy	DisGeNET Curated	8.633e-10	4.646e-06	4.646e-07	4.259e-06	16	57	SLC12A5,SCN1A,SCN2A,KCNT1,SLC6A1,NAPB,GABRA1,ARHGEF9,GNAO1,CACNA1A,HCN1,GRIN1,NRXN1,KCNA2,KCNB1,KCNQ2

## Sheet: Supplementary Table 5
Category	ID	Name	Source	p-value	q-value Bonferroni	q-value FDR B&H	q-value FDR B&Y	Hit Count in Query List	Hit Count in Genome	Hit in Query List
GO: Molecular Function	GO:0005524	ATP binding		1.056e-12	7.592e-10	3.934e-10	2.815e-09	62	1475	KIF18A,ILF2,ERCC6L,KIAA0232,PBK,KIF4A,MCM2,MCM3,MCM5,MCM6,MCM7,CHEK1,TRIP13,TTK,MELK,CDC7,AURKA,NEK2,UBE2J2,CLCN3,KIF15,CLK2,RECQL4,BUB1,BUB1B,KIF14,UBE2S,PLK1,PIF1,RAD54L,KIF11,KIFC1,KIF22,KIF2C,RAD51,VRK1,KIF23,DTYMK,UBE2C,HIPK2,XRCC3,RFC2,RFC4,KIF20A,PKMYT1,LIG1,ATAD3B,RUVBL1,UBE2T,TK1,CHTF18,FLAD1,TPX2,CHEK2,CDK1,CDC6,KIF18B,POLQ,DDX39A,PLK4,TOP2A,AURKB
GO: Molecular Function	GO:0032559	adenyl ribonucleotide binding		1.162e-12	8.355e-10	3.934e-10	2.815e-09	63	1518	KIF18A,ILF2,ERCC6L,KIAA0232,PBK,KIF4A,MCM2,MCM3,MCM5,MCM6,MCM7,CHEK1,TRIP13,TTK,MELK,CDC7,AURKA,NEK2,UBE2J2,CLCN3,KIF15,CLK2,RECQL4,BUB1,BUB1B,KIF14,UBE2S,PLK1,PIF1,RAD54L,KIF11,KIFC1,KIF22,KIF2C,RAD51,VRK1,KIF23,DTYMK,UBE2C,HIPK2,XRCC3,RFC2,RFC4,KIF20A,PKMYT1,LIG1,ATAD3B,RUVBL1,UBE2T,TK1,CHTF18,FLAD1,TPX2,CHEK2,CDK1,RAPGEF2,CDC6,KIF18B,POLQ,DDX39A,PLK4,TOP2A,AURKB
GO: Molecular Function	GO:0030554	adenyl nucleotide binding		1.642e-12	1.18e-09	3.934e-10	2.815e-09	63	1530	KIF18A,ILF2,ERCC6L,KIAA0232,PBK,KIF4A,MCM2,MCM3,MCM5,MCM6,MCM7,CHEK1,TRIP13,TTK,MELK,CDC7,AURKA,NEK2,UBE2J2,CLCN3,KIF15,CLK2,RECQL4,BUB1,BUB1B,KIF14,UBE2S,PLK1,PIF1,RAD54L,KIF11,KIFC1,KIF22,KIF2C,RAD51,VRK1,KIF23,DTYMK,UBE2C,HIPK2,XRCC3,RFC2,RFC4,KIF20A,PKMYT1,LIG1,ATAD3B,RUVBL1,UBE2T,TK1,CHTF18,FLAD1,TPX2,CHEK2,CDK1,RAPGEF2,CDC6,KIF18B,POLQ,DDX39A,PLK4,TOP2A,AURKB
GO: Molecular Function	GO:0003678	DNA helicase activity		2.534e-11	1.822e-08	4.555e-09	3.259e-08	13	65	MCM2,MCM3,MCM5,MCM6,MCM7,GINS1,CDC45,RECQL4,PIF1,GINS4,GTF2H4,RUVBL1,GINS2
GO: Molecular Function	GO:0044877	macromolecular complex binding		6.563e-11	4.719e-08	9.438e-09	6.753e-08	62	1626	NUSAP1,KIF18A,CHAF1B,PTTG1,CENPA,CENPF,SPTBN1,NAA10,NASP,KIF4A,MCM5,HMGN2,RCC1,NUP62,EZH2,RCC2,CDC45,CKS2,KIF15,SUV39H1,KIF14,PPIH,PLK1,PSRC1,KIF11,KIFC1,KIF22,KIF2C,RAD51,VRK1,KIF23,POLD1,CHAF1A,TUBB,BIRC5,PRC1,SPAG5,CCNB1,KIF20A,CCNE1,PPP4C,UBE2T,CENPH,CSNK2B,CPEB4,EXO1,H2AFZ,UHRF1,CDK1,REEP4,CDC6,CDC20,KIF18B,POLQ,SNRPB,SKA1,SNRPD1,SNRPD2,CDCA5,TOP2A,MUTYH,PCNA
GO: Molecular Function	GO:0035639	purine ribonucleoside triphosphate binding		1.053e-10	7.573e-08	9.962e-09	7.129e-08	66	1815	KIF18A,ILF2,ERCC6L,KIAA0232,PBK,KIF4A,MCM2,MCM3,MCM5,MCM6,MCM7,CHEK1,TRIP13,TTK,MELK,CDC7,AURKA,TUBA1B,NEK2,UBE2J2,CLCN3,KIF15,CLK2,RECQL4,BUB1,BUB1B,GNL2,KIF14,UBE2S,PLK1,PIF1,RAD54L,KIF11,KIFC1,KIF22,KIF2C,RAD51,VRK1,KIF23,DTYMK,UBE2C,TUBB,HIPK2,XRCC3,RFC2,RFC4,KIF20A,PKMYT1,LIG1,ATAD3B,RUVBL1,UBE2T,TK1,CHTF18,FLAD1,RHEBL1,TPX2,CHEK2,CDK1,CDC6,KIF18B,POLQ,DDX39A,PLK4,TOP2A,AURKB
GO: Molecular Function	GO:0032555	purine ribonucleotide binding		1.206e-10	8.673e-08	9.962e-09	7.129e-08	67	1864	KIF18A,ILF2,ERCC6L,KIAA0232,PBK,KIF4A,MCM2,MCM3,MCM5,MCM6,MCM7,CHEK1,TRIP13,TTK,MELK,CDC7,AURKA,TUBA1B,NEK2,UBE2J2,CLCN3,KIF15,CLK2,RECQL4,BUB1,BUB1B,GNL2,KIF14,UBE2S,PLK1,PIF1,RAD54L,KIF11,KIFC1,KIF22,KIF2C,RAD51,VRK1,KIF23,DTYMK,UBE2C,TUBB,HIPK2,XRCC3,RFC2,RFC4,KIF20A,PKMYT1,LIG1,ATAD3B,RUVBL1,UBE2T,TK1,CHTF18,FLAD1,RHEBL1,TPX2,CHEK2,CDK1,RAPGEF2,CDC6,KIF18B,POLQ,DDX39A,PLK4,TOP2A,AURKB
GO: Molecular Function	GO:0032550	purine ribonucleoside binding		1.428e-10	1.027e-07	9.962e-09	7.129e-08	66	1828	KIF18A,ILF2,ERCC6L,KIAA0232,PBK,KIF4A,MCM2,MCM3,MCM5,MCM6,MCM7,CHEK1,TRIP13,TTK,MELK,CDC7,AURKA,TUBA1B,NEK2,UBE2J2,CLCN3,KIF15,CLK2,RECQL4,BUB1,BUB1B,GNL2,KIF14,UBE2S,PLK1,PIF1,RAD54L,KIF11,KIFC1,KIF22,KIF2C,RAD51,VRK1,KIF23,DTYMK,UBE2C,TUBB,HIPK2,XRCC3,RFC2,RFC4,KIF20A,PKMYT1,LIG1,ATAD3B,RUVBL1,UBE2T,TK1,CHTF18,FLAD1,RHEBL1,TPX2,CHEK2,CDK1,CDC6,KIF18B,POLQ,DDX39A,PLK4,TOP2A,AURKB
GO: Molecular Function	GO:0032549	ribonucleoside binding		1.532e-10	1.101e-07	9.962e-09	7.129e-08	66	1831	KIF18A,ILF2,ERCC6L,KIAA0232,PBK,KIF4A,MCM2,MCM3,MCM5,MCM6,MCM7,CHEK1,TRIP13,TTK,MELK,CDC7,AURKA,TUBA1B,NEK2,UBE2J2,CLCN3,KIF15,CLK2,RECQL4,BUB1,BUB1B,GNL2,KIF14,UBE2S,PLK1,PIF1,RAD54L,KIF11,KIFC1,KIF22,KIF2C,RAD51,VRK1,KIF23,DTYMK,UBE2C,TUBB,HIPK2,XRCC3,RFC2,RFC4,KIF20A,PKMYT1,LIG1,ATAD3B,RUVBL1,UBE2T,TK1,CHTF18,FLAD1,RHEBL1,TPX2,CHEK2,CDK1,CDC6,KIF18B,POLQ,DDX39A,PLK4,TOP2A,AURKB
GO: Molecular Function	GO:0001883	purine nucleoside binding		1.532e-10	1.101e-07	9.962e-09	7.129e-08	66	1831	KIF18A,ILF2,ERCC6L,KIAA0232,PBK,KIF4A,MCM2,MCM3,MCM5,MCM6,MCM7,CHEK1,TRIP13,TTK,MELK,CDC7,AURKA,TUBA1B,NEK2,UBE2J2,CLCN3,KIF15,CLK2,RECQL4,BUB1,BUB1B,GNL2,KIF14,UBE2S,PLK1,PIF1,RAD54L,KIF11,KIFC1,KIF22,KIF2C,RAD51,VRK1,KIF23,DTYMK,UBE2C,TUBB,HIPK2,XRCC3,RFC2,RFC4,KIF20A,PKMYT1,LIG1,ATAD3B,RUVBL1,UBE2T,TK1,CHTF18,FLAD1,RHEBL1,TPX2,CHEK2,CDK1,CDC6,KIF18B,POLQ,DDX39A,PLK4,TOP2A,AURKB
GO: Biological Process	GO:1903047	mitotic cell cycle process		2.261e-90	6.913e-87	6.913e-87	5.947e-86	130	931	NUSAP1,CDCA3,CDKN2A,CDKN3,KIF18A,PTTG1,CENPW,NUP85,CENPA,ERCC6L,CENPF,PSMA4,PSMA5,SPTBN1,PSMB2,DLGAP5,PSMB4,SPC25,PBK,KIF4A,MCM2,OIP5,MCM3,MCM5,MCM6,DAXX,MCM7,RCC1,NUP62,NUF2,CHEK1,HMMR,MCM10,POLA2,RRM2,EZH2,TTK,MELK,DSN1,GINS1,BANF1,RCC2,CDC7,CDC45,TYMS,CDCA2,AURKA,HAUS8,CKS1B,CKS2,NEK2,NCAPG,KIF15,NDC80,BUB1,BUB1B,ASPM,KIF14,UBE2S,SAC3D1,TIMELESS,CDT1,MAD2L2,DSCC1,PLK1,IQGAP3,PSRC1,WDR62,KIF11,…
GO: Biological Process	GO:0000278	mitotic cell cycle		2.009e-85	6.141e-82	3.07e-82	2.641e-81	130	1016	NUSAP1,CDCA3,CDKN2A,CDKN3,KIF18A,PTTG1,CENPW,NUP85,CENPA,ERCC6L,CENPF,PSMA4,PSMA5,SPTBN1,PSMB2,DLGAP5,PSMB4,SPC25,PBK,KIF4A,MCM2,OIP5,MCM3,MCM5,MCM6,DAXX,MCM7,RCC1,NUP62,NUF2,CHEK1,HMMR,MCM10,POLA2,RRM2,EZH2,TTK,MELK,DSN1,GINS1,BANF1,RCC2,CDC7,CDC45,TYMS,CDCA2,AURKA,HAUS8,CKS1B,CKS2,NEK2,NCAPG,KIF15,NDC80,BUB1,BUB1B,ASPM,KIF14,UBE2S,SAC3D1,TIMELESS,CDT1,MAD2L2,DSCC1,PLK1,IQGAP3,PSRC1,WDR62,KIF11,…
GO: Biological Process	GO:0022402	cell cycle process		1.396e-84	4.267e-81	1.422e-81	1.224e-80	145	1385	NUSAP1,CDCA3,CDKN2A,CDKN3,KIF18A,PTTG1,CENPW,NUP85,CENPA,ERCC6L,CENPL,CENPF,PSMA4,PSMA5,SPTBN1,PSMB2,DLGAP5,PSMB4,SPC25,PBK,KIF4A,MCM2,OIP5,MCM3,MCM5,MCM6,DAXX,MCM7,RCC1,NUP62,NUF2,CHEK1,HMMR,MCM10,POLA2,RRM2,EZH2,TRIP13,TTK,CENPK,MELK,DSN1,GINS1,BANF1,RCC2,CDC7,CDC45,FANCA,FANCD2,TYMS,CDCA2,AURKA,HAUS8,CKS1B,CKS2,FANCG,NEK2,NCAPG,KIF15,NDC80,CENPM,RECQL4,BUB1,BUB1B,ASPM,KIF14,UBE2S,SAC3D1,TIMELE…
GO: Biological Process	GO:0007049	cell cycle		1.754e-83	5.361e-80	1.34e-80	1.153e-79	158	1766	NUSAP1,CDCA3,CDKN2A,CDKN3,KIF18A,CHAF1B,PTTG1,CENPW,NUP85,CENPA,ERCC6L,CENPL,CENPF,PSMA4,PSMA5,SPTBN1,PSMB2,DLGAP5,HJURP,PSMB4,SPC25,PBK,NASP,KIF4A,MCM2,OIP5,MCM3,MCM5,MCM6,DAXX,MCM7,RCC1,NUP62,NUF2,CHEK1,MND1,HMMR,MCM10,POLA2,RRM2,EZH2,TRIP13,TTK,CENPK,MELK,DSN1,GINS1,BANF1,RCC2,CDC7,CDC45,FANCA,FANCD2,TYMS,CDCA2,AURKA,HAUS8,CKS1B,CKS2,FANCG,NEK2,NCAPG,KIF15,NDC80,CENPM,SUV39H1,RECQL4,BUB1,BUB1B…
GO: Biological Process	GO:0000280	nuclear division		1.264e-60	3.865e-57	7.731e-58	6.65e-57	88	599	NUSAP1,CDCA3,KIF18A,PTTG1,CENPW,ERCC6L,CENPF,DLGAP5,SPC25,PBK,KIF4A,OIP5,RCC1,NUP62,NUF2,CHEK1,TRIP13,TTK,DSN1,RCC2,FANCA,FANCD2,CDCA2,AURKA,HAUS8,CKS2,NEK2,NCAPG,KIF15,NDC80,BUB1,BUB1B,ASPM,KIF14,UBE2S,SAC3D1,TIMELESS,MAD2L2,DSCC1,PLK1,PSRC1,RAD54L,KIF11,KIFC1,KIF22,KIF2C,RAD51,RANBP1,VRK1,KIF23,UBE2C,HAUS5,BIRC5,XRCC3,PRC1,NCAPH,CDCA8,SPAG5,CCNA2,ZWINT,CCNB1,CEP55,ITGB3BP,PKMYT1,CCNF,SPC24,RUVB…
GO: Biological Process	GO:0048285	organelle fission		2.441e-58	7.463e-55	1.244e-55	1.07e-54	88	636	NUSAP1,CDCA3,KIF18A,PTTG1,CENPW,ERCC6L,CENPF,DLGAP5,SPC25,PBK,KIF4A,OIP5,RCC1,NUP62,NUF2,CHEK1,TRIP13,TTK,DSN1,RCC2,FANCA,FANCD2,CDCA2,AURKA,HAUS8,CKS2,NEK2,NCAPG,KIF15,NDC80,BUB1,BUB1B,ASPM,KIF14,UBE2S,SAC3D1,TIMELESS,MAD2L2,DSCC1,PLK1,PSRC1,RAD54L,KIF11,KIFC1,KIF22,KIF2C,RAD51,RANBP1,VRK1,KIF23,UBE2C,HAUS5,BIRC5,XRCC3,PRC1,NCAPH,CDCA8,SPAG5,CCNA2,ZWINT,CCNB1,CEP55,ITGB3BP,PKMYT1,CCNF,SPC24,RUVB…
GO: Biological Process	GO:0051301	cell division		2.876e-54	8.791e-51	1.256e-51	1.08e-50	86	668	NUSAP1,CDCA3,CDKN2A,PTTG1,CENPW,ERCC6L,CENPF,SPTBN1,DLGAP5,SPC25,KIF4A,OIP5,DAXX,RCC1,NUF2,CHEK1,TTK,DSN1,RCC2,CDC7,CDCA2,AURKA,TUBA1B,HAUS8,CKS1B,CKS2,NEK2,NCAPG,NDC80,BUB1,BUB1B,ASPM,KIF14,UBE2S,SAC3D1,TIMELESS,MAD2L2,PLK1,PSRC1,KIF11,KIFC1,KIF2C,RANBP1,VRK1,KIF23,UBE2C,HAUS5,TUBB,BIRC5,PARD3B,STMN1,XRCC3,PRC1,NCAPH,CDCA8,SPAG5,CCNA2,ZWINT,CCNB1,CEP55,ITGB3BP,KIF20A,PKMYT1,CCNE1,CCNF,SPC24,LIG1…
GO: Biological Process	GO:0007059	chromosome segregation		9.122e-50	2.789e-46	3.486e-47	2.999e-46	63	333	NUSAP1,KIF18A,PTTG1,CENPW,NUP85,CENPA,ERCC6L,CENPL,CENPF,DLGAP5,HJURP,SPC25,KIF4A,RCC1,NUF2,TRIP13,TTK,CENPK,DSN1,RCC2,FANCD2,CDCA2,NEK2,NCAPG,NDC80,CENPM,RECQL4,BUB1,BUB1B,KIF14,MAD2L2,DSCC1,PLK1,PSRC1,KIF11,KIFC1,KIF22,KIF2C,KIF23,UBE2C,BIRC5,XRCC3,PRC1,NCAPH,CDCA8,SPAG5,ZWINT,CCNB1,CEP55,ITGB3BP,SPC24,CENPH,CHTF18,SKA3,CDC6,CDC20,KIF18B,ESPL1,SKA1,CDCA5,TOP2A,MAD2L1,AURKB
GO: Biological Process	GO:0000819	sister chromatid segregation		1.823e-48	5.573e-45	6.192e-46	5.326e-45	54	225	NUSAP1,KIF18A,PTTG1,NUP85,CENPA,ERCC6L,CENPL,CENPF,DLGAP5,SPC25,KIF4A,NUF2,TTK,CENPK,DSN1,RCC2,NEK2,NCAPG,NDC80,CENPM,RECQL4,BUB1,BUB1B,KIF14,MAD2L2,DSCC1,PLK1,PSRC1,KIFC1,KIF22,KIF2C,KIF23,UBE2C,BIRC5,XRCC3,PRC1,NCAPH,CDCA8,SPAG5,ZWINT,CCNB1,CEP55,ITGB3BP,SPC24,CENPH,CDC6,CDC20,KIF18B,ESPL1,SKA1,CDCA5,TOP2A,MAD2L1,AURKB
GO: Biological Process	GO:0051276	chromosome organization		3.032e-47	9.268e-44	9.268e-45	7.973e-44	101	1189	NUSAP1,CDKN2A,KIF18A,CHAF1B,PTTG1,CENPW,NUP85,CENPA,ERCC6L,CENPL,CENPF,FBL,DLGAP5,HJURP,SPC25,NAA10,NASP,KIF4A,MCM2,OIP5,HMGB2,MCM3,MCM5,MCM6,DAXX,MCM7,NUF2,CHEK1,POLA2,EZH2,TRIP13,TTK,CENPK,DSN1,GINS1,RCC2,CDC45,FANCD2,AURKA,NEK2,NCAPG,NDC80,CENPM,SUV39H1,RECQL4,BUB1,BUB1B,FEN1,KIF14,MAD2L2,DSCC1,PLK1,TAF12,PSRC1,PIF1,RAD54L,KIFC1,KIF22,KIF2C,RAD51,VRK1,KIF23,VPS72,POLD1,POLE2,CHAF1A,UBE2C,GINS4…
GO: Cellular Component	GO:0005694	chromosome		6.495e-55	2.871e-52	2.871e-52	1.915e-51	99	941	NUSAP1,CDKN2A,KIF18A,EME1,CHAF1B,CENPW,NUP85,CENPA,ERCC6L,CENPL,CENPF,FBL,HJURP,SPC25,NASP,KIF4A,MCM2,OIP5,HMGB2,MCM3,MCM5,HMGN2,MCM6,DAXX,MCM7,RCC1,EXOSC5,NUF2,CHEK1,MCM10,POLA2,EZH2,CENPK,DSN1,GINS1,BANF1,RCC2,CDC45,FANCD2,CDCA2,AURKA,NEK2,NCAPG,NDC80,CENPM,SUV39H1,RECQL4,BUB1,BUB1B,FEN1,TIMELESS,DSCC1,PLK1,PIF1,KIF22,RAD9A,KIF2C,RAD51,EXOSC9,POLD1,POLE2,CHAF1A,DTL,EXOSC3,GINS4,BIRC5,E2F1,XRCC3…
GO: Cellular Component	GO:0044427	chromosomal part		3.277e-47	1.449e-44	7.243e-45	4.831e-44	87	839	CDKN2A,KIF18A,EME1,CHAF1B,CENPW,NUP85,CENPA,ERCC6L,CENPL,CENPF,HJURP,SPC25,NASP,MCM2,OIP5,HMGB2,MCM3,MCM5,HMGN2,MCM6,DAXX,MCM7,RCC1,EXOSC5,NUF2,CHEK1,MCM10,POLA2,EZH2,CENPK,DSN1,GINS1,RCC2,CDC45,AURKA,NEK2,NCAPG,NDC80,CENPM,SUV39H1,BUB1,BUB1B,FEN1,TIMELESS,DSCC1,PLK1,PIF1,KIF22,RAD9A,KIF2C,RAD51,POLD1,POLE2,CHAF1A,EXOSC3,GINS4,BIRC5,E2F1,XRCC3,RFC2,RFC4,NCAPH,CDCA8,SPAG5,ZWINT,CCNB1,ITGB3BP,THOC6…
GO: Cellular Component	GO:0098687	chromosomal region		2.447e-39	1.081e-36	3.605e-37	2.404e-36	55	344	KIF18A,CENPW,NUP85,CENPA,ERCC6L,CENPL,CENPF,HJURP,SPC25,MCM2,OIP5,MCM3,MCM5,MCM6,DAXX,MCM7,NUF2,CHEK1,CENPK,DSN1,RCC2,AURKA,NEK2,NDC80,CENPM,SUV39H1,BUB1,BUB1B,FEN1,DSCC1,PLK1,PIF1,KIF22,KIF2C,RAD51,POLD1,BIRC5,XRCC3,CDCA8,SPAG5,ZWINT,CCNB1,ITGB3BP,THOC6,SPC24,CENPH,CHEK2,H2AFX,CDK1,SKA3,SKA1,CDCA5,MAD2L1,PCNA,AURKB
GO: Cellular Component	GO:0000793	condensed chromosome		1.992e-34	8.806e-32	2.202e-32	1.468e-31	42	208	CENPW,NUP85,CENPA,ERCC6L,CENPF,HJURP,SPC25,HMGB2,RCC1,NUF2,CHEK1,CENPK,DSN1,BANF1,FANCD2,AURKA,NEK2,NCAPG,NDC80,CENPM,SUV39H1,BUB1,BUB1B,PLK1,RAD9A,KIF2C,RAD51,BIRC5,NCAPH,SPAG5,ZWINT,CCNB1,ITGB3BP,SPC24,CENPH,H2AFX,SKA3,SKA1,CDCA5,TOP2A,MAD2L1,AURKB
GO: Cellular Component	GO:0000775	chromosome, centromeric region		9.038e-33	3.995e-30	7.989e-31	5.329e-30	39	185	KIF18A,CENPW,NUP85,CENPA,ERCC6L,CENPL,CENPF,HJURP,SPC25,OIP5,DAXX,NUF2,CENPK,DSN1,RCC2,AURKA,NEK2,NDC80,CENPM,SUV39H1,BUB1,BUB1B,DSCC1,PLK1,KIF22,KIF2C,BIRC5,CDCA8,SPAG5,ZWINT,CCNB1,ITGB3BP,SPC24,CENPH,SKA3,SKA1,CDCA5,MAD2L1,AURKB
GO: Cellular Component	GO:0005819	spindle		1.986e-30	8.776e-28	1.463e-28	9.756e-28	45	308	NUSAP1,KIF18A,NUP85,CENPF,DLGAP5,KIF4A,NUP62,TTK,RCC2,AURKA,HAUS8,NEK2,KIF15,BUB1B,ASPM,KIF14,SAC3D1,MAD2L2,PLK1,PSRC1,WDR62,KIF11,KIFC1,KIF22,VRK1,KIF23,POC1A,HAUS5,BIRC5,PRC1,CDCA8,SPAG5,CCNB1,KIF20A,HAUS1,TPX2,CDK1,SKA3,CDC6,CDC20,KIF18B,ESPL1,SKA1,MAD2L1,AURKB
GO: Cellular Component	GO:0000779	condensed chromosome, centromeric region		2.939e-28	1.299e-25	1.817e-26	1.212e-25	29	105	CENPW,NUP85,CENPA,ERCC6L,CENPF,HJURP,SPC25,NUF2,CENPK,DSN1,AURKA,NEK2,NDC80,CENPM,BUB1,BUB1B,PLK1,KIF2C,BIRC5,SPAG5,ZWINT,CCNB1,ITGB3BP,SPC24,CENPH,SKA3,SKA1,MAD2L1,AURKB
GO: Cellular Component	GO:0015630	microtubule cytoskeleton		3.288e-28	1.453e-25	1.817e-26	1.212e-25	76	1125	NUSAP1,KIF18A,NUP85,ERCC6L,CENPF,DLGAP5,KIF4A,MCM2,MCM3,DAXX,NUP62,CHEK1,TTK,RCC2,CDC7,CDC45,AURKA,TUBA1B,HAUS8,NEK2,NCAPG,KIF15,BUB1B,ASPM,KIF14,SAC3D1,TIMELESS,MAD2L2,TACC3,PLK1,PSRC1,WDR62,KIF11,KIFC1,KIF22,KIF2C,FNIP2,RAD51,CCHCR1,RANBP1,VRK1,KIF23,POC1A,GTSE1,DTL,HAUS5,TUBB,BIRC5,STMN1,PRC1,CDCA8,SPAG5,CCNB1,CEP55,KIF20A,CCNE1,CCNF,PPP4C,RUVBL1,HAUS1,CCNB2,TPX2,HSPB11,CDK1,REEP4,SKA3,CDC6,CD…
GO: Cellular Component	GO:0000776	kinetochore		2.632e-27	1.163e-24	1.292e-25	8.62e-25	30	124	KIF18A,CENPW,NUP85,CENPA,ERCC6L,CENPF,HJURP,SPC25,NUF2,CENPK,DSN1,NEK2,NDC80,CENPM,BUB1,BUB1B,PLK1,KIF22,KIF2C,BIRC5,SPAG5,ZWINT,CCNB1,ITGB3BP,SPC24,CENPH,SKA3,SKA1,MAD2L1,AURKB
GO: Cellular Component	GO:0000777	condensed chromosome kinetochore		9.407e-27	4.158e-24	4.158e-25	2.773e-24	27	95	CENPW,NUP85,CENPA,ERCC6L,CENPF,HJURP,SPC25,NUF2,CENPK,DSN1,NEK2,NDC80,CENPM,BUB1,BUB1B,PLK1,KIF2C,BIRC5,SPAG5,ZWINT,CCNB1,ITGB3BP,SPC24,CENPH,SKA3,SKA1,MAD2L1
Human Phenotype	HP:0006872	Cerebral hypoplasia		4.112e-14	6.155e-11	6.155e-11	4.856e-10	11	29	TRIP13,FANCA,FANCD2,FANCG,BUB1,BUB1B,KIF14,MAD2L2,RAD51,UBE2T,FANCI
Human Phenotype	HP:0000340	Sloping forehead		4.879e-13	7.304e-10	3.652e-10	2.881e-09	16	108	TRIP13,FANCA,FANCD2,FANCG,BUB1,BUB1B,ASPM,KIF14,MAD2L2,WDR62,KIF11,RAD51,UBE2T,FANCI,SLC25A19,PLK4
Human Phenotype	HP:0000252	Microcephaly		1.685e-11	2.523e-08	8.41e-09	6.634e-08	34	766	SF3B4,TRAIP,NAA10,TRIP13,CDC45,FANCA,FANCD2,FANCG,RECQL4,BUB1,BUB1B,ASPM,PSMC3IP,KIF14,CDT1,MAD2L2,ALDH6A1,WDR62,KIF11,RAD51,DONSON,POC1A,RNASEH2A,TUBB,TSEN54,RFC2,THOC6,UBE2T,FANCI,CDC6,SLC25A19,SNRPB,PLK4,PCNA
Human Phenotype	HP:0000520	Proptosis		7.232e-10	1.083e-06	2.288e-07	1.805e-06	18	228	NAA10,EZH2,BANF1,CDC45,FANCA,FANCD2,FANCG,RECQL4,ASPM,MAD2L2,RAD54L,RAD51,POLD1,PARD3B,UBE2T,FANCI,PLK4,AFF4
Human Phenotype	HP:0100867	Duodenal stenosis		7.642e-10	1.144e-06	2.288e-07	1.805e-06	8	25	CDC45,FANCA,FANCD2,FANCG,MAD2L2,RAD51,UBE2T,FANCI
Human Phenotype	HP:0006721	Acute lymphoblastic leukemia		2.271e-09	3.4e-06	3.882e-07	3.062e-06	14	135	CDKN2A,EZH2,TRIP13,FANCA,FANCD2,FANCG,BUB1,BUB1B,MAD2L2,RAD54L,RAD51,UBE2T,FANCI,CHEK2
Human Phenotype	HP:0001511	Intrauterine growth retardation		2.328e-09	3.485e-06	3.882e-07	3.062e-06	23	417	SF3B4,TRAIP,TRIP13,CDC45,FANCA,FANCD2,FANCG,RECQL4,BUB1,BUB1B,PSMC3IP,KIF14,CDT1,MAD2L2,RAD51,DONSON,RNASEH2A,RFC2,UBE2T,FANCI,CDC6,SNRPB,PLK4
Human Phenotype	HP:0006501	Aplasia/Hypoplasia of the radius		2.556e-09	3.826e-06	3.882e-07	3.062e-06	9	41	SF3B4,FANCA,FANCD2,FANCG,RECQL4,MAD2L2,RAD51,UBE2T,FANCI
Human Phenotype	HP:0007565	Multiple cafe-au-lait spots		2.671e-09	3.998e-06	3.882e-07	3.062e-06	10	56	TRIP13,FANCA,FANCD2,FANCG,BUB1,BUB1B,MAD2L2,RAD51,UBE2T,FANCI
Human Phenotype	HP:0100615	Ovarian neoplasm		2.826e-09	4.231e-06	3.882e-07	3.062e-06	13	114	CDKN2A,EZH2,FANCA,FANCD2,FANCG,MAD2L2,TACC3,RAD54L,RAD51,UBE2T,FANCI,CHEK2,MUTYH
Mouse Phenotype	MP:0003077	abnormal cell cycle		2.125e-21	4.653e-18	4.653e-18	3.847e-17	38	316	NUSAP1,CDKN2A,KIF18A,PTTG1,MAGOH,CENPA,SPTBN1,MCM2,MCM3,CHEK1,CDC7,AURKA,BUB1,BUB1B,ASPM,MAD2L2,TACC3,PLK1,WDR62,RAD9A,FOXM1,HIPK2,BIRC5,E2F1,NCAPH,CDCA8,CCNA2,CCNF,PPP4C,TPX2,CHEK2,CDK1,CDC20,ESPL1,PLK4,MAD2L1,AURKB,MYBL2
Mouse Phenotype	MP:0013292	embryonic lethality prior to organogenesis		1.219e-20	2.667e-17	1.334e-17	1.103e-16	54	721	NUSAP1,PTTG1,CENPA,FBL,TRAIP,NASP,PFDN2,NUP62,CHEK1,MCM10,RRM2,EZH2,GINS1,HNRNPL,CDC7,CDC45,AURKA,BUB1,BUB1B,FEN1,DNAJC9,LSM4,TIMELESS,PLK1,KIF11,KIF22,RAD51,EXOSC9,MRPL47,POLD1,CHAF1A,DTL,POLR2H,EXOSC3,GINS4,BIRC5,CDCA8,CCNA2,CCNB1,SRRT,PPP4C,RUVBL1,C1orf112,CSNK2B,H2AFZ,UBR3,CDK1,CDC20,ESPL1,CPSF3,PLK4,MAD2L1,PCNA,MYBL2
Mouse Phenotype	MP:0008762	embryonic lethality		3.797e-20	8.311e-17	2.157e-17	1.783e-16	84	1766	NUSAP1,KIF18A,PTTG1,MAGOH,ILF2,CENPA,FBL,TRAIP,NASP,MCM5,DAXX,PFDN2,NUP62,CHEK1,MCM10,RRM2,EZH2,GINS1,HNRNPL,CDC7,CDC45,FANCD2,AURKA,RECQL4,BUB1,BUB1B,FEN1,DNAJC9,LSM4,TIMELESS,MAD2L2,TACC3,PLK1,KIF11,KIF22,RAD9A,RAD51,SEL1L,EXOSC9,MRPL47,POLD1,CHAF1A,DTL,POLR2H,EXOSC3,HIPK2,GINS4,BIRC5,SIVA1,E2F1,XRCC3,PRC1,NCAPH,CDCA8,CCNA2,CCNB1,CCNE1,CCNF,SRRT,PPP4C,RUVBL1,C1orf112,CSNK2B,RHEBL1,TPX2,H2AFX,FK…
Mouse Phenotype	MP:0013293	embryonic lethality prior to tooth bud stage		3.941e-20	8.626e-17	2.157e-17	1.783e-16	56	797	NUSAP1,PTTG1,CENPA,FBL,TRAIP,NASP,PFDN2,NUP62,CHEK1,MCM10,RRM2,EZH2,GINS1,HNRNPL,CDC7,CDC45,AURKA,BUB1,BUB1B,FEN1,DNAJC9,LSM4,TIMELESS,PLK1,KIF11,KIF22,RAD51,EXOSC9,MRPL47,POLD1,CHAF1A,DTL,POLR2H,EXOSC3,GINS4,BIRC5,XRCC3,CDCA8,CCNA2,CCNB1,SRRT,PPP4C,RUVBL1,C1orf112,CSNK2B,H2AFZ,UBR3,CDK1,CDC20,ESPL1,CDCA5,CPSF3,PLK4,MAD2L1,PCNA,MYBL2
Mouse Phenotype	MP:0003111	abnormal cell nucleus morphology		5.703e-20	1.248e-16	2.497e-17	2.065e-16	29	180	CDKN2A,PTTG1,CENPA,MCM2,DAXX,CHEK1,TTK,FANCA,AURKA,BUB1,BUB1B,FEN1,PLK1,PIF1,RAD54L,KIF22,CHAF1A,BIRC5,E2F1,NCAPH,CDCA8,LMNB1,TPX2,CHEK2,CDK1,CDC20,ESPL1,MAD2L1,AURKB
Mouse Phenotype	MP:0004046	abnormal mitosis		1.233e-15	2.699e-12	4.499e-13	3.72e-12	23	148	NUSAP1,CDKN2A,KIF18A,PTTG1,MAGOH,CENPA,SPTBN1,AURKA,BUB1,BUB1B,TACC3,PLK1,WDR62,BIRC5,NCAPH,CDCA8,TPX2,CDK1,CDC20,ESPL1,PLK4,MAD2L1,AURKB
Mouse Phenotype	MP:0008866	chromosomal instability		1.167e-13	2.554e-10	3.648e-11	3.017e-10	19	114	MCM2,MCM3,MCM6,MCM7,FANCA,FANCD2,AURKA,FANCG,RECQL4,BUB1,BUB1B,FEN1,CCNE1,LIG1,CHEK2,EXO1,H2AFX,POLQ,MAD2L1
Mouse Phenotype	MP:0011096	embryonic lethality between implantation and somite formation, complete penetrance		1.584e-13	3.467e-10	3.942e-11	3.259e-10	27	265	CENPA,PFDN2,NUP62,CHEK1,EZH2,GINS1,CDC7,CDC45,BUB1,BUB1B,LSM4,TIMELESS,KIF11,RAD51,POLD1,GINS4,BIRC5,CCNA2,SRRT,PPP4C,CSNK2B,H2AFZ,CDC20,ESPL1,PLK4,MAD2L1,MYBL2
Mouse Phenotype	MP:0010094	abnormal chromosome stability		1.621e-13	3.548e-10	3.942e-11	3.259e-10	19	116	MCM2,MCM3,MCM6,MCM7,FANCA,FANCD2,AURKA,FANCG,RECQL4,BUB1,BUB1B,FEN1,CCNE1,LIG1,CHEK2,EXO1,H2AFX,POLQ,MAD2L1
Mouse Phenotype	MP:0004023	abnormal chromosome number		1.301e-12	2.847e-09	2.847e-10	2.354e-09	16	84	CENPA,CHEK1,TTK,AURKA,BUB1,BUB1B,FEN1,PLK1,E2F1,TPX2,CHEK2,CDK1,CDC20,ESPL1,MAD2L1,AURKB
Domain	IPR027640	Kinesin-like_fam	InterPro	5.203e-11	6.915e-08	1.299e-08	1.009e-07	11	43	KIF18A,KIF4A,KIF15,KIF14,KIF11,KIFC1,KIF22,KIF2C,KIF23,KIF20A,KIF18B
Domain	PS50067	KINESIN_MOTOR_2	PROSITE	6.84e-11	9.09e-08	1.299e-08	1.009e-07	11	44	KIF18A,KIF4A,KIF15,KIF14,KIF11,KIFC1,KIF22,KIF2C,KIF23,KIF20A,KIF18B
Domain	3.40.850.10	-	Gene3D	6.84e-11	9.09e-08	1.299e-08	1.009e-07	11	44	KIF18A,KIF4A,KIF15,KIF14,KIF11,KIFC1,KIF22,KIF2C,KIF23,KIF20A,KIF18B
Domain	SM00129	KISc	SMART	6.84e-11	9.09e-08	1.299e-08	1.009e-07	11	44	KIF18A,KIF4A,KIF15,KIF14,KIF11,KIFC1,KIF22,KIF2C,KIF23,KIF20A,KIF18B
Domain	PF00225	Kinesin	Pfam	6.84e-11	9.09e-08	1.299e-08	1.009e-07	11	44	KIF18A,KIF4A,KIF15,KIF14,KIF11,KIFC1,KIF22,KIF2C,KIF23,KIF20A,KIF18B
Domain	IPR001752	Kinesin_motor_dom	InterPro	6.84e-11	9.09e-08	1.299e-08	1.009e-07	11	44	KIF18A,KIF4A,KIF15,KIF14,KIF11,KIFC1,KIF22,KIF2C,KIF23,KIF20A,KIF18B
Domain	PS00411	KINESIN_MOTOR_1	PROSITE	6.84e-11	9.09e-08	1.299e-08	1.009e-07	11	44	KIF18A,KIF4A,KIF15,KIF14,KIF11,KIFC1,KIF22,KIF2C,KIF23,KIF20A,KIF18B
Domain	IPR019821	Kinesin_motor_CS	InterPro	6.68e-10	8.878e-07	1.11e-07	8.622e-07	10	41	KIF18A,KIF4A,KIF14,KIF11,KIFC1,KIF22,KIF2C,KIF23,KIF20A,KIF18B
Domain	PF14551	MCM_N	Pfam	5.932e-09	7.883e-06	7.166e-07	5.568e-06	5	6	MCM2,MCM3,MCM5,MCM6,MCM7
Domain	IPR027925	MCM_N	InterPro	5.932e-09	7.883e-06	7.166e-07	5.568e-06	5	6	MCM2,MCM3,MCM5,MCM6,MCM7
Pathway	1269741	Cell Cycle	BioSystems: REACTOME	1.506e-76	1.277e-73	1.277e-73	9.352e-73	105	624	CDKN2A,KIF18A,PTTG1,CENPW,NUP85,CENPA,ERCC6L,CENPL,CENPF,PSMA4,PSMA5,PSMB2,HJURP,PSMB4,SPC25,MCM2,OIP5,MCM3,MCM5,MCM6,MCM7,NUP62,NUF2,CHEK1,MND1,HMMR,MCM10,POLA2,RRM2,CENPK,DSN1,GINS1,BANF1,RCC2,CDC7,CDC45,TYMS,AURKA,HAUS8,CKS1B,NEK2,NCAPG,NDC80,CENPM,BUB1,BUB1B,FEN1,PSMC3IP,CDT1,PLK1,RAD9A,KIF2C,RAD51,FOXM1,VRK1,KIF23,POLD1,POLE2,GTSE1,UBE2C,HAUS5,TUBB,GINS4,BIRC5,E2F1,E2F2,RFC2,RFC4,NCAPH,CDCA8…
Pathway	1269763	Cell Cycle, Mitotic	BioSystems: REACTOME	9.125e-71	7.738e-68	3.869e-68	2.832e-67	94	517	CDKN2A,KIF18A,PTTG1,NUP85,CENPA,ERCC6L,CENPL,CENPF,PSMA4,PSMA5,PSMB2,PSMB4,SPC25,MCM2,MCM3,MCM5,MCM6,MCM7,NUP62,NUF2,HMMR,MCM10,POLA2,RRM2,CENPK,DSN1,GINS1,BANF1,RCC2,CDC7,CDC45,TYMS,AURKA,HAUS8,CKS1B,NEK2,NCAPG,NDC80,CENPM,BUB1,BUB1B,FEN1,CDT1,PLK1,KIF2C,FOXM1,VRK1,KIF23,POLD1,POLE2,GTSE1,UBE2C,HAUS5,TUBB,GINS4,BIRC5,E2F1,E2F2,RFC2,RFC4,NCAPH,CDCA8,CCNA2,ZWINT,CCNB1,ITGB3BP,KIF20A,PKMYT1,CCNE1,S…
Pathway	1269820	Mitotic Prometaphase	BioSystems: REACTOME	7.284e-33	6.177e-30	2.059e-30	1.507e-29	34	111	KIF18A,NUP85,CENPA,ERCC6L,CENPL,CENPF,SPC25,NUF2,CENPK,DSN1,RCC2,NCAPG,NDC80,CENPM,BUB1,BUB1B,PLK1,KIF2C,BIRC5,NCAPH,CDCA8,ZWINT,CCNB1,ITGB3BP,SPC24,CCNB2,CENPH,CSNK2B,CDK1,CDC20,SKA1,CDCA5,MAD2L1,AURKB
Pathway	1269810	M Phase	BioSystems: REACTOME	2.465e-32	2.09e-29	5.226e-30	3.826e-29	49	311	KIF18A,PTTG1,NUP85,CENPA,ERCC6L,CENPL,CENPF,PSMA4,PSMA5,PSMB2,PSMB4,SPC25,NUP62,NUF2,CENPK,DSN1,BANF1,RCC2,NCAPG,NDC80,CENPM,BUB1,BUB1B,PLK1,KIF2C,VRK1,KIF23,UBE2C,BIRC5,NCAPH,CDCA8,ZWINT,CCNB1,ITGB3BP,KIF20A,SPC24,LMNB1,CCNB2,CENPH,CSNK2B,H2AFX,H2AFZ,CDK1,CDC20,ESPL1,SKA1,CDCA5,MAD2L1,AURKB
Pathway	1269825	Mitotic Anaphase	BioSystems: REACTOME	6.832e-30	5.794e-27	1.159e-27	8.483e-27	38	181	KIF18A,PTTG1,NUP85,CENPA,ERCC6L,CENPL,CENPF,PSMA4,PSMA5,PSMB2,PSMB4,SPC25,NUF2,CENPK,DSN1,BANF1,RCC2,NDC80,CENPM,BUB1,BUB1B,PLK1,KIF2C,VRK1,UBE2C,BIRC5,CDCA8,ZWINT,ITGB3BP,SPC24,LMNB1,CENPH,CDC20,ESPL1,SKA1,CDCA5,MAD2L1,AURKB
Pathway	1269823	Mitotic Metaphase and Anaphase	BioSystems: REACTOME	8.506e-30	7.213e-27	1.16e-27	8.495e-27	38	182	KIF18A,PTTG1,NUP85,CENPA,ERCC6L,CENPL,CENPF,PSMA4,PSMA5,PSMB2,PSMB4,SPC25,NUF2,CENPK,DSN1,BANF1,RCC2,NDC80,CENPM,BUB1,BUB1B,PLK1,KIF2C,VRK1,UBE2C,BIRC5,CDCA8,ZWINT,ITGB3BP,SPC24,LMNB1,CENPH,CDC20,ESPL1,SKA1,CDCA5,MAD2L1,AURKB
Pathway	1269821	Resolution of Sister Chromatid Cohesion	BioSystems: REACTOME	9.578e-30	8.122e-27	1.16e-27	8.495e-27	31	103	KIF18A,NUP85,CENPA,ERCC6L,CENPL,CENPF,SPC25,NUF2,CENPK,DSN1,RCC2,NDC80,CENPM,BUB1,BUB1B,PLK1,KIF2C,BIRC5,CDCA8,ZWINT,CCNB1,ITGB3BP,SPC24,CCNB2,CENPH,CDK1,CDC20,SKA1,CDCA5,MAD2L1,AURKB
Pathway	1269826	Separation of Sister Chromatids	BioSystems: REACTOME	2.981e-27	2.528e-24	3.16e-25	2.314e-24	35	170	KIF18A,PTTG1,NUP85,CENPA,ERCC6L,CENPL,CENPF,PSMA4,PSMA5,PSMB2,PSMB4,SPC25,NUF2,CENPK,DSN1,RCC2,NDC80,CENPM,BUB1,BUB1B,PLK1,KIF2C,UBE2C,BIRC5,CDCA8,ZWINT,ITGB3BP,SPC24,CENPH,CDC20,ESPL1,SKA1,CDCA5,MAD2L1,AURKB
Pathway	83054	Cell cycle	BioSystems: KEGG	1.134e-25	9.615e-23	1.068e-23	7.821e-23	30	124	CDKN2A,PTTG1,MCM2,MCM3,MCM5,MCM6,MCM7,CHEK1,TTK,CDC7,CDC45,BUB1,BUB1B,MAD2L2,PLK1,E2F1,E2F2,CCNA2,CCNB1,PKMYT1,CCNE1,CCNB2,CHEK2,CDK1,CDC6,CDC20,CDC25C,ESPL1,MAD2L1,PCNA
Pathway	1269875	DNA Replication	BioSystems: REACTOME	1.464e-24	1.242e-21	1.242e-22	9.09e-22	28	111	PSMA4,PSMA5,PSMB2,PSMB4,MCM2,MCM3,MCM5,MCM6,MCM7,MCM10,POLA2,GINS1,CDC7,CDC45,FEN1,CDT1,POLD1,POLE2,GINS4,E2F1,E2F2,RFC2,RFC4,CCNA2,LIG1,GINS2,CDC6,PCNA
Pubmed	20360068	Systematic analysis of human protein complexes identifies chromosome segregation proteins.	Pubmed	9.901e-69	2.025e-64	2.025e-64	2.127e-63	90	1341	NUSAP1,CDKN2A,PTTG1,SF3B4,NUP85,ERCC6L,CENPF,FBL,HJURP,SPC25,NAA10,KIF4A,PFDN2,NUP62,NUF2,CHEK1,HMMR,TTK,DSN1,AURKA,HAUS8,CKS1B,CKS2,NEK2,NDC80,RECQL4,BUB1,BUB1B,ASPM,SF3A3,KIF14,LSM4,TIMELESS,MAD2L2,TACC3,PPIH,PLK1,PFDN6,IQGAP3,WDR62,KPNA2,DCAF15,RANBP1,KIF23,POC1A,TROAP,MRPL47,UBE2C,DTL,HAUS5,BIRC5,TSEN54,PRC1,CDCA8,SPAG5,CCNA2,ZWINT,CCNB1,CEP55,KIF20A,PKMYT1,SPC24,ATAD3B,RUVBL1,LMNB1,HAUS1,CCN…
Pubmed	25281560	Proximity biotinylation and affinity purification are complementary approaches for the interactome mapping of chromatin-associated protein complexes.	Pubmed	6.553e-46	1.34e-41	6.7e-42	7.037e-41	54	636	BRIX1,NUSAP1,KIF18A,EME1,CHAF1B,DLGAP5,CCDC18,NASP,KIF4A,HMGB2,MCM10,BANF1,RCC2,CDCA2,HAUS8,NCAPG,NDC80,BUB1B,DNAJC9,KIF14,KIF11,KIFC1,KIF22,KIF2C,FOXM1,VRK1,KIF23,VPS72,RNASEH2A,CHAF1A,HAUS5,BIRC5,PRC1,CDCA8,SPAG5,PPM1G,RRP1,CCNA2,CEP55,KIF20A,SPC24,RAD51AP1,HAUS1,ASF1B,TPX2,UHRF1,SKA3,KIF18B,SKA1,CDCA5,CPSF3,SNRPG,AURKB,HDGF
Pubmed	22863883	A high-throughput approach for measuring temporal changes in the interactome.	Pubmed	4.146e-41	8.479e-37	2.826e-37	2.968e-36	68	1456	NUSAP1,CDKN2A,ILF2,NUP85,PSMA4,PSMA5,SPTBN1,PSMB2,PSMB4,SPC25,NAA10,NASP,MCM2,HMGB2,MCM3,LAGE3,MCM5,MCM6,MCM7,PFDN2,POLA2,TRIP13,RCC2,PTMA,FANCD2,TYMS,NCAPG,KIF15,BUB1B,FEN1,SF3A3,TIMELESS,PFDN6,KPNA2,RAD51,RANBP1,PSMG3,RNASEH2A,POLD1,POLR2H,TUBB,GINS4,RFC2,RFC4,NCAPH,PPM1G,SPC24,SRRT,LIG1,PPP4C,RUVBL1,LMNB1,FANCI,CSNK2B,PAFAH1B3,H2AFZ,GINS2,CDK1,LSM2,SNRPA,SNRPA1,DDX39A,SNRPB,SNRPD1,SNRPD2,SNRPF…
Pubmed	20467437	Direct interaction between hnRNP-M and CDC5L/PLRG1 proteins affects alternative splice site choice.	Pubmed	5.64e-39	1.153e-34	2.883e-35	3.028e-34	47	581	SF3B4,ERCC6L,SPTBN1,KIF4A,MCM5,NUF2,CHEK1,TRIP13,TTK,MELK,FANCD2,AURKA,TUBA1B,U2AF1,NCAPG,NDC80,BUB1,BUB1B,FEN1,SF3A3,UBE2S,PLK1,KIF11,KIF2C,KPNA2,VRK1,POLD1,DTYMK,TUBB,RFC2,RFC4,NCAPH,CCNB1,RUVBL1,PRCC,FANCI,TPX2,CDK1,GEMIN6,CDC20,SNRPA,SNRPA1,DDX39A,SNRPD1,CPSF3,TOP2A,AURKB
Pubmed	26638075	A Dynamic Protein Interaction Landscape of the Human Centrosome-Cilium Interface.	Pubmed	5.798e-37	1.186e-32	2.371e-33	2.491e-32	70	1820	CDCA3,NUP85,DLGAP5,SPC25,CCDC18,NAA10,MCM2,HMGB2,PFDN2,NUF2,HMMR,MCM10,RRM2,TTK,SNX19,BANF1,PTMA,TYMS,CDCA2,AURKA,TUBA1B,HAUS8,NEK2,NDC80,KIF14,PPIH,PLK1,TAF12,PFDN6,WDR62,KIF2C,MIIP,SEL1L,CCHCR1,KIF23,POC1A,TROAP,GTSE1,HAUS5,TUBB,C1orf35,RFC2,PRC1,NCAPH,SPAG5,CCNA2,CCNB1,CEP55,KIF20A,PKMYT1,SPC24,PPP4C,RUVBL1,HAUS1,CCNB2,FANCI,CENPH,PDCD5,TMEM184C,TMSB10,REEP4,SKA3,CDC20,CDC25C,SKA1,SNRPC,NBR1,P…
Pubmed	20508983	Centrosome-related genes, genetic variation, and risk of breast cancer.	Pubmed	1.865e-35	3.814e-31	6.356e-32	6.676e-31	26	102	MCM2,MCM3,MCM5,MCM6,MCM7,NUF2,CHEK1,TTK,NEK2,NDC80,ASPM,TACC3,PLK1,KIF11,KIF2C,RANBP1,KIF23,SPAG5,CCNB1,CCNE1,TPX2,CDK1,CDC25C,ESPL1,PLK4,AURKB
Pubmed	21145461	Dynamics of cullin-RING ubiquitin ligase network revealed by systematic quantitative proteomics.	Pubmed	4.691e-35	9.593e-31	1.37e-31	1.439e-30	66	1698	BRIX1,CDKN2A,SF3B4,ILF2,CENPF,FBL,PSMA4,PSMA5,SPTBN1,PSMB4,MCM2,MCM3,LAGE3,MCM6,MCM7,ABT1,EXOSC5,NUP62,CHEK1,TRIP13,HNRNPL,CDC45,CKS1B,PJA2,U2AF1,NCAPG,TRNAU1AP,ASPM,GNL2,DNAJC9,SF3A3,PPIH,PLK1,KPNA2,EXOSC9,PSMG3,POLD1,DTL,TUBB,C1orf35,RFC2,CCNA2,CCNB1,SRRT,ATAD3B,PPP4C,RUVBL1,DAZAP1,NUDT1,FANCI,BOLA2,MRTO4,CDC20,SNRPA,SNRPA1,SNRPB,SNRPC,SNRPD1,SNRPD2,MRPL11,SNRPF,MRPL9,SNRPG,TOP2A,MAD2L1,PCNA
Pubmed	25921289	Temporal proteomics of NGF-TrkA signaling identifies an inhibitory role for the E3 ligase Cbl-b in neuroblastoma cell differentiation.	Pubmed	1.447e-34	2.959e-30	3.698e-31	3.884e-30	69	1922	BRIX1,ILF2,NUP85,ERCC6L,FBL,PSMA4,PSMA5,SPTBN1,DLGAP5,NAA10,NASP,KIF4A,MCM2,HMGB2,MCM3,MCM5,MCM6,MCM7,NUF2,MCM10,RRM2,TRIP13,TTK,RCC2,HNRNPL,CDC45,FANCD2,U2AF1,NCAPG,KIF15,NDC80,FEN1,GNL2,DNAJC9,SF3A3,KIF14,TIMELESS,TACC3,PLK1,IQGAP3,KIF11,KIF2C,KPNA2,SEL1L,RANBP1,EXOSC9,POLD1,HAUS5,TUBB,RFC4,NCAPH,PPM1G,SRRT,LIG1,ATAD3B,RUVBL1,LMNB1,FANCI,CHTF18,CSNK2B,SBF2,PAFAH1B3,UHRF1,CDK1,SNRPA,DDX39A,CPSF3…
Pubmed	16565220	Phosphoproteome analysis of the human mitotic spindle.	Pubmed	4.183e-31	8.554e-27	9.504e-28	9.982e-27	29	210	KIF18A,CENPF,DLGAP5,KIF4A,NUF2,HMMR,EZH2,DSN1,NCAPG,NDC80,ASPM,WDR62,KIF11,KIF22,KPNA2,KIF23,BIRC5,PRC1,NCAPH,CDCA8,SPAG5,KIF20A,PKMYT1,SPC24,TPX2,CDK1,SKA3,TOP2A,AURKB
Pubmed	17081983	Global, in vivo, and site-specific phosphorylation dynamics in signaling networks.	Pubmed	7.686e-31	1.572e-26	1.572e-27	1.651e-26	59	1546	EME1,CHAF1B,CENPA,CENPF,KIAA0232,SPTBN1,DLGAP5,PBK,NAA10,NASP,KIF4A,MCM2,MCM3,DAXX,RCC1,EXOSC5,NUF2,EZH2,MELK,DSN1,RCC2,PTMA,PJA2,U2AF1,BCL2L12,NCAPG,SERINC1,SUV39H1,ASPM,GNL2,SF3A3,KIF14,TIMELESS,WDR62,KIFC1,RAD9A,KIF2C,KPNA2,EXOSC9,KIF23,CHAF1A,E2F1,STMN1,CEP55,KIF20A,SRRT,LIG1,PRCC,CSNK2B,PDCD5,TPX2,UHRF1,REEP4,CDCA5,TOP2A,IL6ST,AFF4,HDGF,MYBL2
Interaction	int:CDK1	CDK1 interactions		9.267e-33	6.12e-29	6.12e-29	5.736e-28	47	275	CDKN3,CHAF1B,PTTG1,DLGAP5,PBK,NASP,RCC1,CHEK1,RRM2,EZH2,PTMA,FANCA,CDCA2,CKS1B,CKS2,FANCG,NCAPG,BUB1,FEN1,CDT1,KIF11,FOXM1,BIRC5,E2F1,STMN1,PRC1,NCAPH,SPAG5,CCNA2,CCNB1,CEP55,PKMYT1,CCNE1,CCNF,LMNB1,TK1,CCNB2,CSNK2B,CDK1,CDC6,CDC20,CDC25C,ESPL1,CDCA5,TOP2A,PCNA,HDGF
Interaction	int:CDC5L	CDC5L interactions		4.046e-22	2.672e-18	1.336e-18	1.252e-17	52	590	CDKN2A,MAGOH,SF3B4,ILF2,ERCC6L,SPTBN1,KIF4A,MCM3,MCM5,NUF2,CHEK1,MCM10,TRIP13,MELK,ISY1,FANCD2,TUBA1B,U2AF1,NDC80,BUB1,BUB1B,FEN1,SF3A3,UBE2S,CDT1,PLK1,KIF11,KIF2C,KPNA2,POLD1,DTYMK,TUBB,RFC2,RFC4,NCAPH,CCNB1,PPP4C,RUVBL1,PRCC,FANCI,TPX2,GEMIN6,CDC20,SNRPA,SNRPA1,DDX39A,SNRPD1,SNRPD2,CPSF3,TOP2A,AURKB,HDGF
Interaction	int:FZR1	FZR1 interactions		2.175e-21	1.437e-17	4.789e-18	4.488e-17	27	131	CDCA3,PTTG1,DAXX,RRM2,TTK,FANCD2,CKS1B,CKS2,NEK2,BUB1B,PSMC3IP,UBE2S,CDT1,MAD2L2,TACC3,PLK1,FOXM1,UBE2C,E2F1,CCNA2,CCNB1,TK1,TPX2,CDK1,CDC6,CDC20,AURKB
Interaction	int:CDC20	CDC20 interactions		3.479e-20	2.298e-16	4.7e-17	4.405e-16	28	159	KIF18A,PTTG1,DAXX,TRIP13,TTK,AURKA,CKS1B,CKS2,NEK2,BUB1,BUB1B,UBE2S,CDT1,MAD2L2,PLK1,UBE2C,TUBB,E2F1,CCNA2,CCNB1,TK1,FBXO43,CDK1,CDC6,CDC20,MAD2L1,PCNA,AURKB
Interaction	int:HIST1H2BG	HIST1H2BG interactions		3.558e-20	2.35e-16	4.7e-17	4.405e-16	32	222	NUSAP1,KIF18A,EME1,DLGAP5,KIF4A,MCM2,HMGB2,MCM10,RCC2,PTMA,CDCA2,KIFC1,KIF22,KIF2C,FOXM1,VRK1,KIF23,VPS72,RNASEH2A,BIRC5,PRC1,CDCA8,PPM1G,CCNA2,KIF20A,RAD51AP1,TPX2,UHRF1,KIF18B,CDCA5,AURKB,HDGF
Interaction	int:PCNA	PCNA interactions		8.638e-19	5.704e-15	9.507e-16	8.911e-15	35	303	CDKN2A,CHAF1B,TRAIP,MCM7,CHEK1,DSN1,PTMA,CDC45,FANCA,FANCD2,FEN1,TIMELESS,CDT1,DSCC1,RAD9A,RAD51,POLD1,CHAF1A,DTL,SIVA1,RFC2,RFC4,CCNA2,CCNB1,CCNE1,LIG1,CHTF18,EXO1,UHRF1,CDK1,CDC6,CDC20,CDC25C,MUTYH,PCNA
Interaction	int:HIST1H3A	HIST1H3A interactions		4.014e-17	2.651e-13	3.787e-14	3.55e-13	32	280	NUSAP1,CHAF1B,NASP,MCM2,MCM5,MCM6,DAXX,MCM7,RCC1,EZH2,BANF1,CDC45,CDCA2,SUV39H1,DNAJC9,KIF11,KIFC1,KIF22,VRK1,KIF23,CHAF1A,PRC1,CDCA8,ASF1B,H2AFX,H2AFZ,UHRF1,KIF18B,CDCA5,MAD2L1,AURKB,HDGF
Interaction	int:CDK2	CDK2 interactions		6.675e-16	4.408e-12	5.299e-13	4.967e-12	47	677	CDKN3,CHAF1B,ILF2,FBL,PSMA5,SPTBN1,NASP,MCM2,HMGB2,MCM3,HMGN2,MCM6,MCM7,EZH2,TTK,RCC2,CDC7,PTMA,CDC45,CKS1B,CKS2,BUB1,FEN1,CDT1,KPNA2,FOXM1,POLD1,CHAF1A,MAGOHB,BIRC5,E2F1,STMN1,PRC1,CCNA2,CCNB1,CCNE1,UBE2T,CCNB2,CDK1,CDC6,CDC20,SNRPA,CDC25C,SNRPD2,SNRPF,PCNA,MYBL2
Interaction	int:PLK1	PLK1 interactions		7.222e-16	4.77e-12	5.299e-13	4.967e-12	30	268	ERCC6L,PSMA4,PSMA5,PSMB2,PSMB4,MCM2,MCM3,MCM6,MCM7,RRM2,AURKA,NDC80,BUB1,BUB1B,ASPM,PLK1,KIF2C,KIF23,TUBB,PRC1,SPAG5,CCNB1,CEP55,PKMYT1,CHEK2,CDC20,CDC25C,CDCA5,PLK4,TOP2A
Interaction	int:NDC80	NDC80 interactions		8.513e-16	5.622e-12	5.622e-13	5.269e-12	18	76	SPC25,NUF2,DSN1,AURKA,NEK2,NDC80,BUB1,BUB1B,PLK1,CCHCR1,ZWINT,CCNB1,SPC24,HAUS1,CENPH,SKA1,MAD2L1,AURKB
Cytoband	4q27	4q27		3.699e-05	0.007878	0.007878	0.0468	4	22	KIAA1109,EXOSC9,CCNA2,MAD2L1
Cytoband	6p21.3	6p21.3		9.79e-05	0.02085	0.01012	0.06013	10	257	DAXX,ZNRD1,PFDN6,KIFC1,CCHCR1,TCF19,GTF2H4,CSNK2B,FKBPL,LSM2
Cytoband	1p34.1	1p34.1		0.0001426	0.03037	0.01012	0.06013	5	57	NASP,PPIH,KIF2C,CDC20,MUTYH
Transcription Factor Binding Site	V$E2F_Q6	V$E2F_Q6		3.125e-18	1.475e-15	9.857e-16	6.639e-15	27	182	MXD3,NASP,MCM2,MCM3,HMGN2,MCM6,MCM7,NUP62,POLA2,RRM2,EZH2,CDC45,FANCD2,DNAJC9,CDT1,ALDH6A1,RAD51,RANBP1,POLD1,POLE2,E2F1,STMN1,PKMYT1,H2AFZ,CDK1,CDC6,SNRPD1
Transcription Factor Binding Site	V$E2F_Q4	V$E2F_Q4		4.177e-18	1.971e-15	9.857e-16	6.639e-15	27	184	MXD3,NASP,MCM2,MCM3,HMGN2,MCM6,MCM7,NUP62,POLA2,RRM2,EZH2,CDC45,FANCD2,DNAJC9,CDT1,ALDH6A1,RAD51,RANBP1,POLD1,POLE2,E2F1,STMN1,PKMYT1,H2AFZ,CDK1,CDC6,SNRPD1
Transcription Factor Binding Site	V$E2F_Q6_01	V$E2F_Q6_01		4.803e-17	2.267e-14	7.557e-15	5.09e-14	26	184	MXD3,NASP,MCM2,MCM3,HMGN2,MCM6,DAXX,MCM7,RRM2,EZH2,MELK,PTMA,CDC45,FANCG,SUV39H1,RAD51,RANBP1,POLD1,POLE2,E2F1,STMN1,PKMYT1,LIG1,H2AFZ,CDC6,PLK4
Transcription Factor Binding Site	V$E2F_03	V$E2F_03		1.233e-16	5.819e-14	1.455e-14	9.798e-14	26	191	MXD3,NASP,MCM2,MCM3,HMGN2,MCM6,DAXX,MCM7,POLA2,EZH2,MELK,PTMA,CDC45,FANCG,SUV39H1,DNAJC9,RAD51,RANBP1,POLD1,E2F1,STMN1,PKMYT1,LIG1,H2AFZ,CDC6,PLK4
Transcription Factor Binding Site	V$E2F4DP2_01	V$E2F4DP2_01		5.25e-16	2.478e-13	3.098e-14	2.086e-13	25	184	MXD3,NASP,MCM2,MCM3,MCM6,MCM7,NUP62,RRM2,EZH2,PTMA,FANCD2,FANCG,SUV39H1,DNAJC9,ALDH6A1,RANBP1,POLD1,POLE2,E2F1,STMN1,PKMYT1,H2AFZ,CDK1,CDC6,SNRPD1
Transcription Factor Binding Site	V$E2F1DP1_01	V$E2F1DP1_01		5.25e-16	2.478e-13	3.098e-14	2.086e-13	25	184	MXD3,NASP,MCM2,MCM3,MCM6,MCM7,NUP62,RRM2,EZH2,PTMA,FANCD2,FANCG,SUV39H1,DNAJC9,ALDH6A1,RANBP1,POLD1,POLE2,E2F1,STMN1,PKMYT1,H2AFZ,CDK1,CDC6,SNRPD1
Transcription Factor Binding Site	V$E2F1DP2_01	V$E2F1DP2_01		5.25e-16	2.478e-13	3.098e-14	2.086e-13	25	184	MXD3,NASP,MCM2,MCM3,MCM6,MCM7,NUP62,RRM2,EZH2,PTMA,FANCD2,FANCG,SUV39H1,DNAJC9,ALDH6A1,RANBP1,POLD1,POLE2,E2F1,STMN1,PKMYT1,H2AFZ,CDK1,CDC6,SNRPD1
Transcription Factor Binding Site	V$E2F1DP1RB_01	V$E2F1DP1RB_01		5.25e-16	2.478e-13	3.098e-14	2.086e-13	25	184	MXD3,NASP,MCM2,MCM3,HMGN2,MCM6,MCM7,NUP62,POLA2,RRM2,EZH2,DNAJC9,CDT1,ALDH6A1,RAD51,POLD1,POLE2,E2F1,STMN1,PKMYT1,LIG1,H2AFZ,CDK1,CDC6,SNRPD1
Transcription Factor Binding Site	V$E2F4DP1_01	V$E2F4DP1_01		1.002e-15	4.729e-13	5.254e-14	3.539e-13	25	189	MXD3,NASP,MCM2,MCM3,MCM6,MCM7,NUP62,RRM2,EZH2,FANCD2,FANCG,SUV39H1,DNAJC9,ALDH6A1,RANBP1,POLD1,POLE2,E2F1,STMN1,PKMYT1,LIG1,H2AFZ,CDK1,CDC6,SNRPD1
Transcription Factor Binding Site	V$E2F1_Q4_01	V$E2F1_Q4_01		3.73e-15	1.761e-12	1.601e-13	1.078e-12	24	181	MXD3,NASP,MCM2,MCM3,HMGN2,MCM6,DAXX,MCM7,POLA2,EZH2,MELK,PTMA,CDC45,FANCG,SUV39H1,RAD51,RANBP1,POLE2,E2F1,STMN1,PKMYT1,H2AFZ,CDK1,CDC6
Gene Family	622	Kinesins|Protein phosphatase 1 regulatory subunits	genenames.org	1.641e-13	1.592e-11	1.592e-11	8.21e-11	11	46	KIF18A,KIF4A,KIF15,KIF14,KIF11,KIFC1,KIF22,KIF2C,KIF23,KIF20A,KIF18B
Gene Family	1085	MCM family	genenames.org	5.862e-09	5.687e-07	2.843e-07	1.466e-06	5	9	MCM2,MCM3,MCM5,MCM6,MCM7
Gene Family	548	Fanconi anemia complementation groups	genenames.org	1.419e-08	1.377e-06	4.59e-07	2.367e-06	6	20	FANCA,FANCD2,FANCG,RAD51,UBE2T,FANCI
Gene Family	535	DNA polymerases	genenames.org	1.418e-06	0.0001376	3.439e-05	0.0001773	5	23	POLA2,MAD2L2,POLD1,POLE2,POLQ
Gene Family	1338	Baculoviral IAP repeat containing|Chromosomal passenger complex	genenames.org	2.603e-06	0.0002525	4.208e-05	0.000217	3	4	BIRC5,CDCA8,AURKB
Gene Family	931	GINS complex	genenames.org	2.603e-06	0.0002525	4.208e-05	0.000217	3	4	GINS1,GINS4,GINS2
Gene Family	473	Cyclins	genenames.org	4.797e-06	0.0004653	6.648e-05	0.0003428	5	29	CCNA2,CCNB1,CCNE1,CCNF,CCNB2
Gene Family	413	AAA ATPases	genenames.org	6.627e-06	0.0006428	8.035e-05	0.0004144	6	53	TRIP13,RFC2,RFC4,ATAD3B,RUVBL1,CHTF18
Gene Family	581	HAUS augmin like complex	genenames.org	3.552e-05	0.003445	0.0003828	0.001974	3	8	HAUS8,HAUS5,HAUS1
Gene Family	817	Exosome complex	genenames.org	0.000136	0.01319	0.001319	0.006802	3	12	EXOSC5,EXOSC9,EXOSC3
Coexpression	18662380-S3-AURKA	Human Breast_Wirapati08_355genes_AURKA_Module	GeneSigDB	9.323e-178	7.323e-174	7.323e-174	6.99e-173	138	344	NUSAP1,CDCA3,CDKN3,KIF18A,CHAF1B,PTTG1,CENPW,CENPA,ERCC6L,CENPF,PSMB2,DLGAP5,HJURP,SPC25,PBK,KIF4A,MCM2,OIP5,HMGB2,MCM3,LAGE3,MCM6,NUF2,CHEK1,MND1,HMMR,MCM10,POLA2,RRM2,EZH2,TRIP13,TTK,CENPK,MELK,DSN1,CDC7,CDC45,FANCA,TYMS,AURKA,TUBA1B,CKS1B,CKS2,FANCG,NEK2,NCAPG,KIF15,NDC80,CENPM,RECQL4,BUB1,BUB1B,FEN1,ASPM,DNAJC9,KIF14,UBE2S,SAC3D1,TIMELESS,CDT1,TACC3,DSCC1,PLK1,IQGAP3,PSRC1,PIF1,RAD54L,KIF11,K…
Coexpression	M2368	Genes up-regulated during later stage of differentiation of Oli-Neu cells (oligodendroglial precursor) in response to PD174265 [PubChem=4709].	MSigDB C2: CGP Curated Gene Sets (v6.0)	1.226e-172	9.632e-169	4.816e-169	4.597e-168	156	570	NUSAP1,CDCA3,CDKN2A,MXD3,CDKN3,KIF18A,EME1,CHAF1B,PTTG1,CENPW,NUP85,CENPA,ERCC6L,CENPL,CENPF,TRAIP,DLGAP5,HJURP,SPC25,CCDC18,PBK,NASP,KIF4A,MCM2,OIP5,HMGB2,MCM3,MCM5,MCM6,MCM7,RCC1,RDM1,NUF2,CHEK1,HMMR,MCM10,POLA2,RRM2,EZH2,TRIP13,TTK,CENPK,MELK,GINS1,ZNRD1,ISY1,CDC7,CDC45,FANCA,FANCD2,TYMS,CDCA2,AURKA,HAUS8,CKS1B,CKS2,NEK2,C17orf53,NCAPG,NDC80,CENPM,SUV39H1,RECQL4,BUB1,BUB1B,FEN1,ASPM,DNAJC9,PSM…
Coexpression	16141321-Table2	Human Breast_Miller05_p53	GeneSigDB	4.548e-138	3.572e-134	1.191e-134	1.137e-133	151	816	NUSAP1,CDCA3,NRM,CDKN3,KIF18A,CHAF1B,PTTG1,MAGOH,CENPW,CENPA,ERCC6L,CENPL,CENPF,PSMA4,PSMB2,DLGAP5,HJURP,SPC25,PBK,NASP,KIF4A,MCM2,OIP5,HMGB2,LAGE3,MCM5,MCM6,RCC1,NUF2,CHEK1,MND1,HMMR,MCM10,POLA2,RRM2,EZH2,TRIP13,TTK,CENPK,MELK,GINS1,RCC2,CDC7,CDC45,FANCA,FANCD2,TYMS,CDCA2,AURKA,HAUS8,CKS1B,U2AF1,CKS2,BCL2L12,NEK2,NCAPG,KIF15,NDC80,CENPM,RECQL4,BUB1,BUB1B,FEN1,ASPM,DNAJC9,KIF14,LSM4,TIMELESS,CDT1…
Coexpression	M15664	The 'Cervical Cancer Proliferation Cluster' (CCPC): genes whose expression in cervical carcinoma positively correlates with that of the HPV E6 and E7 oncogenes; they are also differentially expressed according to disease outcome.	MSigDB C2: CGP Curated Gene Sets (v6.0)	8.088e-136	6.352e-132	1.588e-132	1.516e-131	89	140	NUSAP1,CDCA3,CDKN2A,CHAF1B,PTTG1,CENPA,ERCC6L,CENPF,DLGAP5,HJURP,PBK,KIF4A,MCM2,OIP5,HMGB2,CHEK1,HMMR,MCM10,POLA2,RRM2,EZH2,TRIP13,TTK,MELK,GINS1,TYMS,AURKA,CKS2,NEK2,NCAPG,KIF15,NDC80,CENPM,BUB1,BUB1B,FEN1,ASPM,KIF14,UBE2S,LSM4,SAC3D1,TACC3,PLK1,KIF11,KIFC1,KIF2C,KPNA2,FOXM1,KIF23,DTYMK,GTSE1,UBE2C,DTL,GINS4,BIRC5,E2F1,PRC1,NCAPH,CDCA8,SPAG5,CCNA2,ZWINT,CCNB1,CEP55,KIF20A,CCNF,RAD51AP1,LMNB1,ASF…
Coexpression	M16010	Genes down-regulated in H1975 cells (non-small cell lung cancer, NSCLC) resistant to gefitinib [PubChem=123631] after treatment with EGFR inhibitor CL-387785 [PubChem=2776] for 24h.	MSigDB C2: CGP Curated Gene Sets (v6.0)	8.352e-135	6.559e-131	1.312e-131	1.252e-130	105	251	NUSAP1,CDCA3,CDKN3,CENPA,ERCC6L,DLGAP5,HJURP,SPC25,PBK,KIF4A,MCM2,HMGB2,MCM3,MCM5,MCM6,MCM7,HMMR,MCM10,POLA2,RRM2,EZH2,TRIP13,TTK,MELK,DSN1,GINS1,CDC45,TYMS,AURKA,TUBA1B,CKS1B,CKS2,NEK2,NCAPG,KIF15,NDC80,CENPM,BUB1,BUB1B,FEN1,ASPM,DNAJC9,PSMC3IP,KIF14,UBE2S,TIMELESS,CDT1,DSCC1,PLK1,PSRC1,KIF11,KIF2C,CDCA4,KPNA2,RAD51,RANBP1,VRK1,KIF23,DONSON,RNASEH2A,POLE2,CHAF1A,GTSE1,UBE2C,DTL,TUBB,BIRC5,E2F1,D…
Coexpression	M3766	Up-regulated genes whose expression correlated with histologic grade of invasive breast cancer tumors: comparison of grade 1 vs grade 3.	MSigDB C2: CGP Curated Gene Sets (v6.0)	2.307e-131	1.812e-127	3.019e-128	2.882e-127	89	151	NUSAP1,CDCA3,CDKN3,PTTG1,CENPA,CENPF,DLGAP5,HJURP,KIF4A,MCM2,OIP5,MCM3,LAGE3,MCM6,CHEK1,HMMR,MCM10,RRM2,EZH2,TRIP13,TTK,MELK,DSN1,GINS1,CDC45,AURKA,TUBA1B,CKS2,NEK2,NCAPG,KIF15,NDC80,BUB1,BUB1B,FEN1,ASPM,DNAJC9,KIF14,UBE2S,TIMELESS,TACC3,DSCC1,PLK1,PFDN6,KIF11,KIFC1,KIF2C,KPNA2,RAD51,FOXM1,VRK1,DONSON,RNASEH2A,TROAP,GTSE1,UBE2C,BIRC5,E2F1,STMN1,PRC1,RFC4,NCAPH,CDCA8,SPAG5,CCNA2,ZWINT,CCNB1,CEP55,…
Coexpression	17150101-TableS1h	Human Breast_Troester06_364genes_up_DOX-MCF7	GeneSigDB	5.145e-130	4.041e-126	5.772e-127	5.51e-126	106	282	CDKN3,KIF18A,PTTG1,RPP21,NUP85,CENPF,DLGAP5,SPC25,NASP,MCM2,HMGB2,MCM3,LAGE3,MCM6,NUF2,MND1,HMMR,MCM10,RRM2,EZH2,TTK,CENPK,MELK,DSN1,CDC7,CDC45,FANCA,FANCD2,AURKA,HAUS8,CKS1B,CKS2,FANCG,NCAPG,NDC80,RECQL4,BUB1,BUB1B,ASPM,DNAJC9,PSMC3IP,KIF14,UBE2S,TIMELESS,CDT1,TACC3,DSCC1,PSRC1,RAD54L,KIF2C,KPNA2,RAD51,FOXM1,RANBP1,VRK1,KIF23,POC1A,RNASEH2A,POLD1,DTYMK,POLE2,GTSE1,DTL,GINS4,BIRC5,SIVA1,DEPDC1,ST…
Coexpression	17145885-SuppTable2	Human Lung_Kobayashi06_320genes	GeneSigDB	4.12e-128	3.236e-124	4.045e-125	3.861e-124	101	247	NUSAP1,CDCA3,CDKN3,CENPA,ERCC6L,DLGAP5,HJURP,SPC25,PBK,KIF4A,MCM2,HMGB2,MCM3,MCM5,MCM6,MCM7,HMMR,MCM10,POLA2,RRM2,EZH2,TRIP13,TTK,MELK,DSN1,GINS1,CDC45,TYMS,AURKA,CKS1B,CKS2,NEK2,NCAPG,KIF15,NDC80,CENPM,BUB1,BUB1B,FEN1,ASPM,DNAJC9,PSMC3IP,KIF14,TIMELESS,CDT1,DSCC1,PLK1,PSRC1,KIF11,KIF2C,CDCA4,KPNA2,RAD51,VRK1,KIF23,DONSON,RNASEH2A,POLE2,CHAF1A,GTSE1,UBE2C,DTL,TUBB,BIRC5,E2F1,DEPDC1,RFC2,PRC1,RFC4…
Coexpression	M2156	Genes up-regulated in MCF7 cells (breast cancer) at 24 h of estradiol [PubChem=5757] treatment.	MSigDB C2: CGP Curated Gene Sets (v6.0)	1.379e-127	1.083e-123	1.203e-124	1.149e-123	109	324	NUSAP1,CHAF1B,PTTG1,NUP85,CENPL,TRAIP,DLGAP5,PBK,NASP,KIF4A,MCM2,MCM3,MCM5,MCM6,MCM7,EXOSC5,CHEK1,MCM10,POLA2,RRM2,TRIP13,TTK,MELK,DSN1,GINS1,CDC45,FANCA,FANCD2,TYMS,CDCA2,AURKA,HAUS8,FANCG,NCAPG,CENPM,SUV39H1,RECQL4,BUB1,BUB1B,FEN1,ASPM,PSMC3IP,LSM4,TIMELESS,CDT1,TACC3,DSCC1,PLK1,IQGAP3,RAD54L,WDR62,KIF11,KIFC1,KIF2C,CDCA4,RAD51,FOXM1,VRK1,KIF23,TCF19,RNASEH2A,TROAP,C21orf58,POLD1,POLE2,CHAF1A,G…
Coexpression	19043454-TableS2	Human Breast_Thorner09_217genes	GeneSigDB	9.628e-126	7.562e-122	7.562e-123	7.218e-122	89	167	NUSAP1,CDKN3,KIF18A,CHAF1B,CENPW,CENPF,TRAIP,DLGAP5,PBK,MCM2,OIP5,HMGB2,MCM3,MND1,HMMR,RRM2,TTK,MELK,DSN1,CDC7,FANCD2,CDCA2,AURKA,HAUS8,CKS1B,CKS2,BCL2L12,FANCG,NCAPG,KIF15,NDC80,RECQL4,BUB1,FEN1,ASPM,TIMELESS,CDT1,DSCC1,PLK1,PIF1,RAD54L,KIF11,KIF2C,KPNA2,RAD51,FAM72D,VRK1,KIF23,POC1A,TROAP,DTYMK,CHAF1A,UBE2C,DTL,BIRC5,STMN1,PRC1,RFC4,NCAPH,CDCA8,SPAG5,CCNA2,ZWINT,CCNB1,CEP55,KIF20A,PKMYT1,RAD51A…
Coexpression Atlas	GSM399452_500	B cells, preB.FrC.BM, CD19+ IgM- CD45R+ CD43+ HSA+, Bone marrow, avg-3	Immgen.org, GSE15907	1.486e-131	3.311e-128	3.311e-128	2.743e-127	122	409	NUSAP1,CDCA3,CDKN3,KIF18A,EME1,CHAF1B,CENPW,CENPA,ERCC6L,CENPL,CENPF,DLGAP5,HJURP,SPC25,CCDC18,PBK,NASP,KIF4A,MCM2,OIP5,HMGB2,MCM3,MCM5,MCM6,MCM7,NUF2,CHEK1,MND1,HMMR,MCM10,RRM2,EZH2,TRIP13,TTK,CENPK,MELK,DSN1,GINS1,CDC7,CDC45,FANCD2,TYMS,CDCA2,AURKA,CKS1B,CKS2,NEK2,C17orf53,NCAPG,KIF15,NDC80,CENPM,BUB1,BUB1B,FEN1,ASPM,KIF14,TIMELESS,TACC3,DSCC1,PLK1,PIF1,RAD54L,KIF11,KIF22,KIF2C,KPNA2,RAD51,FOXM…
Coexpression Atlas	GSM399403_500	alpha beta T cells, T.ISP.Th, 4- 8+ TCR-/lo 24hi, Thymus, avg-3	Immgen.org, GSE15907	2.101e-125	4.682e-122	2.341e-122	1.94e-121	119	417	NUSAP1,CDCA3,KIF18A,CHAF1B,ERCC6L,CENPL,CENPF,DLGAP5,SPC25,CCDC18,PBK,NASP,KIF4A,MCM2,OIP5,HMGB2,MCM3,MCM5,MCM6,MCM7,RCC1,NUP62,NUF2,CHEK1,HMMR,MCM10,POLA2,RRM2,EZH2,TRIP13,TTK,CENPK,MELK,DSN1,GINS1,CDC7,CDC45,FANCD2,TYMS,CDCA2,AURKA,CKS1B,CKS2,NEK2,NCAPG,KIF15,NDC80,BUB1,BUB1B,FEN1,ASPM,KIF14,TIMELESS,TACC3,DSCC1,PLK1,RAD54L,KIF11,KIF22,KIF2C,KPNA2,RAD51,FOXM1,KIF23,TCF19,POLD1,POLE2,CHAF1A,GTSE…
Coexpression Atlas	GSM538358_500	B cells, proB.FrBC.FL, CD19+ IgM- CD43+ CD24+ AA4.1+ CD45R+, Fetal Liver, avg-3	Immgen.org, GSE15907	6.695e-123	1.492e-119	4.972e-120	4.12e-119	116	400	BRIX1,NUSAP1,CDCA3,CDKN3,KIF18A,EME1,CHAF1B,MAGOH,CENPW,CENPA,ERCC6L,CENPF,DLGAP5,SPC25,PBK,NASP,KIF4A,MCM2,OIP5,HMGB2,MCM3,MCM5,MCM6,MCM7,NUF2,CHEK1,HMMR,MCM10,RRM2,EZH2,TRIP13,TTK,CENPK,MELK,GINS1,CDC45,FANCD2,TYMS,CDCA2,AURKA,CKS1B,CKS2,NEK2,NCAPG,KIF15,NDC80,BUB1,BUB1B,FEN1,ASPM,KIF14,UBE2S,TACC3,DSCC1,PLK1,RAD54L,KIF11,KIF22,KIF2C,KPNA2,RAD51,FOXM1,KIF23,TCF19,POLE2,CHAF1A,GTSE1,UBE2C,DTL,BI…
Coexpression Atlas	12Dn_Top_500_Cluster_4	12Dn_Top_500_Cluster_4	Brain Map - Allen iN	1.427e-115	3.179e-112	7.948e-113	6.586e-112	77	117	NUSAP1,CDKN3,KIF18A,CHAF1B,CENPW,CENPF,DLGAP5,KIF4A,MCM2,OIP5,MCM5,MCM6,RCC1,NUF2,MND1,HMMR,MCM10,RRM2,TTK,CENPK,MELK,CDC7,CDC45,FANCD2,CDCA2,AURKA,NCAPG,KIF15,NDC80,BUB1,BUB1B,FEN1,ASPM,KIF14,TIMELESS,DSCC1,PLK1,RAD54L,KIF11,KIFC1,KIF2C,CDCA4,RAD51,VRK1,KIF23,TROAP,POLE2,UBE2C,DTL,BIRC5,DEPDC1,NCAPH,CDCA8,SPAG5,CCNA2,ZWINT,CCNB1,KIF20A,RAD51AP1,LMNB1,ASF1B,TK1,CCNB2,FANCI,TPX2,UHRF1,GINS2,CDK1,S…
Coexpression Atlas	GSM399397_500	alpha beta T cells, T.DPbl.Th, 4+ 8+ TCR-/lo FSChi, Thymus, avg-3	Immgen.org, GSE15907	1.089e-111	2.427e-108	4.854e-109	4.022e-108	109	399	NUSAP1,CDCA3,MXD3,CDKN3,KIF18A,EME1,CENPA,ERCC6L,CENPL,CENPF,DLGAP5,HJURP,SPC25,CCDC18,PBK,KIF4A,OIP5,HMGB2,MCM3,MCM5,MCM7,NUF2,CHEK1,HMMR,MCM10,RRM2,EZH2,TRIP13,TTK,CENPK,MELK,DSN1,GINS1,CDC7,CDC45,FANCD2,TYMS,CDCA2,AURKA,CKS1B,CKS2,NEK2,NCAPG,KIF15,NDC80,SUV39H1,BUB1,BUB1B,ASPM,KIF14,UBE2S,TIMELESS,TACC3,PLK1,IQGAP3,PIF1,RAD54L,KIF11,KIF22,KIF2C,KPNA2,RAD51,FOXM1,KIF23,TCF19,TROAP,CHAF1A,GTSE1,…
Coexpression Atlas	GSM791143_500	alpha beta T cells, preT.DN3-4.Th, Lin-/lo CD25int CD44- CD28+, Thymus, avg-3	Immgen.org, GSE15907	8.901e-109	1.983e-105	3.305e-106	2.739e-105	107	397	BRIX1,NUSAP1,CDCA3,KIF18A,CHAF1B,CENPF,DLGAP5,SPC25,CCDC18,PBK,NASP,KIF4A,MCM2,OIP5,HMGB2,MCM3,MCM5,MCM6,MCM7,NUF2,CHEK1,HMMR,MCM10,POLA2,RRM2,EZH2,TRIP13,TTK,CENPK,MELK,GINS1,CDC7,CDC45,FANCD2,TYMS,CDCA2,AURKA,CKS1B,CKS2,NEK2,NCAPG,KIF15,CENPM,BUB1,BUB1B,ASPM,KIF14,TACC3,DSCC1,PLK1,RAD54L,KIF11,KIF22,KIF2C,KPNA2,RAD51,FOXM1,RANBP1,KIF23,TCF19,MRPL47,POLE2,CHAF1A,UBE2C,DTL,BIRC5,DEPDC1,STMN1,PRC1…
Coexpression Atlas	GSM538357_500	B cells, proB.FrA.FL, CD19- IgM- CD43+ CD24intermediate CD45R+ AA4.1+ CD, Fetal Liver, avg-1	Immgen.org, GSE15907	3.807e-107	8.481e-104	1.196e-104	9.914e-104	108	422	BRIX1,NUSAP1,CDCA3,KIF18A,EME1,CHAF1B,CENPA,ERCC6L,CENPF,DLGAP5,SPC25,PBK,NASP,KIF4A,MCM2,OIP5,HMGB2,MCM3,MCM5,MCM6,MCM7,NUF2,CHEK1,HMMR,MCM10,RRM2,EZH2,TRIP13,TTK,CENPK,MELK,DSN1,GINS1,CDC7,CDC45,FANCD2,TYMS,CDCA2,AURKA,CKS1B,CKS2,NEK2,NCAPG,KIF15,NDC80,BUB1,BUB1B,FEN1,ASPM,KIF14,TIMELESS,TACC3,DSCC1,PLK1,RAD54L,KIF11,KIF22,KIF2C,KPNA2,RAD51,FOXM1,KIF23,POLE2,CHAF1A,UBE2C,DTL,BIRC5,DEPDC1,STMN1,…
Coexpression Atlas	GSM538387_500	alpha beta T cells, T.8Eff.Sp.OT1.d5.VSVOva, CD8+ CD45.1+, Spleen, avg-3	Immgen.org, GSE15907	4.296e-107	9.572e-104	1.196e-104	9.914e-104	107	410	NUSAP1,CDCA3,CDKN3,KIF18A,EME1,CHAF1B,CENPA,ERCC6L,CENPF,DLGAP5,SPC25,PBK,NASP,KIF4A,MCM2,HMGB2,MCM3,MCM5,MCM6,MCM7,NUF2,CHEK1,HMMR,MCM10,POLA2,RRM2,EZH2,TRIP13,TTK,CENPK,MELK,DSN1,GINS1,CDC7,CDC45,FANCD2,TYMS,CDCA2,AURKA,CKS1B,CKS2,NEK2,NCAPG,KIF15,NDC80,BUB1,BUB1B,FEN1,ASPM,DNAJC9,KIF14,TIMELESS,CDT1,TACC3,DSCC1,PLK1,RAD54L,KIF11,KIF22,KIF2C,RAD51,FOXM1,KIF23,TCF19,POLE2,CHAF1A,UBE2C,DTL,BIRC5,…
Coexpression Atlas	GSM791149_500	alpha beta T cells, preT.DN3B.Th, Lin-/lo CD25hi CD44- CD28+, Thymus, avg-3	Immgen.org, GSE15907	1.029e-106	2.293e-103	2.548e-104	2.111e-103	107	413	NUSAP1,CDCA3,CHAF1B,DLGAP5,SPC25,CCDC18,PBK,NASP,KIF4A,MCM2,HMGB2,MCM3,MCM5,MCM6,MCM7,NUF2,CHEK1,HMMR,MCM10,POLA2,RRM2,TRIP13,CENPK,MELK,GINS1,RCC2,CDC45,FANCD2,TYMS,CDCA2,AURKA,CKS1B,CKS2,NEK2,NCAPG,KIF15,CENPM,SUV39H1,BUB1,BUB1B,FEN1,CDT1,TACC3,DSCC1,PLK1,RAD54L,KIF11,KIF22,KIF2C,KPNA2,RAD51,FOXM1,RANBP1,KIF23,TCF19,POC1A,POLD1,DTYMK,POLE2,CHAF1A,UBE2C,DTL,BIRC5,E2F1,E2F2,STMN1,PRC1,RFC4,NCAPH,…
Coexpression Atlas	GSM538355_500	B cells, proB.FrA.FL, CD19- IgM- CD43+ CD24intermediate AA4.1+ CD45R+ CD, Fetal Liver, avg-2	Immgen.org, GSE15907	4.721e-104	1.052e-100	1.052e-101	8.715e-101	106	422	BRIX1,NUSAP1,CDCA3,CDKN3,KIF18A,EME1,CHAF1B,CENPW,CENPA,CENPF,DLGAP5,SPC25,CCDC18,PBK,NASP,KIF4A,MCM2,OIP5,HMGB2,MCM3,MCM5,MCM6,MCM7,NUF2,CHEK1,HMMR,MCM10,RRM2,EZH2,TRIP13,TTK,CENPK,MELK,DSN1,GINS1,CDC7,CDC45,FANCD2,TYMS,CDCA2,AURKA,CKS1B,CKS2,NEK2,NCAPG,KIF15,NDC80,BUB1,BUB1B,ASPM,KIF14,TACC3,DSCC1,PLK1,RAD54L,KIF11,KIF22,KIF2C,KPNA2,RAD51,FOXM1,KIF23,POLE2,CHAF1A,UBE2C,DTL,BIRC5,DEPDC1,STMN1,PR…
Computational	M5468 MODULE_54	Cell cycle (expression cluster).	MSigDb: C4 - CM: Cancer Modules (v6.0)	1.258e-98	6.339e-96	6.339e-96	4.311e-95	98	262	NUSAP1,NRM,CDKN3,CHAF1B,PTTG1,CENPA,CENPF,DLGAP5,HJURP,PBK,MCM2,HMGB2,MCM3,MCM5,MCM6,MCM7,RCC1,NUF2,CHEK1,HMMR,RRM2,TRIP13,TTK,MELK,GINS1,CDC7,CDC45,TYMS,AURKA,CKS1B,CKS2,NEK2,NDC80,RECQL4,BUB1,BUB1B,FEN1,ASPM,KIF14,UBE2S,TIMELESS,TACC3,PLK1,PSRC1,RAD54L,KIF11,KIFC1,KIF2C,KPNA2,RAD51,FOXM1,RANBP1,KIF23,TROAP,POLD1,DTYMK,POLE2,CHAF1A,UBE2C,BIRC5,E2F1,DEPDC1,RFC4,NCAPH,SPAG5,CCNA2,ZWINT,CCNB1,CEP55…
Computational	M7419 GNF2_CCNA2	Neighborhood of CCNA2	MSigDb: C4 - CGN: Cancer Gene Neighborhood (v6.0)	1.673e-73	8.433e-71	4.217e-71	2.868e-70	52	68	NUSAP1,CDCA3,CENPA,CENPF,DLGAP5,HJURP,KIF4A,MCM2,HMGB2,MCM3,MCM6,MCM7,HMMR,RRM2,EZH2,TTK,MELK,TYMS,AURKA,CKS1B,CKS2,NCAPG,NDC80,BUB1B,FEN1,ASPM,KIF14,PLK1,KIF11,FOXM1,UBE2C,BIRC5,PRC1,RFC4,CDCA8,CCNA2,ZWINT,KIF20A,RAD51AP1,ASF1B,CCNB2,FANCI,TPX2,H2AFX,GINS2,CDK1,CDC20,KIF18B,ESPL1,TOP2A,PCNA,AURKB
Computational	M13566 GNF2_CDC2	Neighborhood of CDC2	MSigDb: C4 - CGN: Cancer Gene Neighborhood (v6.0)	3.13e-68	1.577e-65	3.944e-66	2.682e-65	48	62	NUSAP1,CDCA3,PTTG1,CENPF,DLGAP5,HJURP,KIF4A,MCM2,HMGB2,HMMR,RRM2,EZH2,TTK,MELK,TYMS,AURKA,CKS2,NCAPG,KIF15,NDC80,FEN1,ASPM,DNAJC9,UBE2S,KIF11,KIFC1,FOXM1,UBE2C,BIRC5,PRC1,RFC4,CDCA8,CCNA2,ZWINT,KIF20A,CCNF,CCNB2,FANCI,TPX2,H2AFX,GINS2,CDK1,CDC20,KIF18B,PLK4,TOP2A,PCNA,MYBL2
Computational	M10439 GNF2_CENPF	Neighborhood of CENPF	MSigDb: C4 - CGN: Cancer Gene Neighborhood (v6.0)	3.13e-68	1.577e-65	3.944e-66	2.682e-65	48	62	NUSAP1,CDCA3,PTTG1,CENPF,DLGAP5,HJURP,KIF4A,MCM2,HMGB2,MCM3,MCM7,HMMR,MCM10,RRM2,TTK,TYMS,AURKA,CKS2,KIF15,NDC80,FEN1,ASPM,DNAJC9,UBE2S,KIF11,KIFC1,FOXM1,DTYMK,UBE2C,BIRC5,PRC1,RFC4,CDCA8,CCNA2,ZWINT,CCNF,CCNB2,FANCI,TPX2,H2AFX,GINS2,CDK1,CDC20,KIF18B,PLK4,TOP2A,PCNA,MYBL2
Computational	M17279 GNF2_PCNA	Neighborhood of PCNA	MSigDb: C4 - CGN: Cancer Gene Neighborhood (v6.0)	6.046e-67	3.047e-64	5.155e-65	3.506e-64	49	68	NUSAP1,CENPF,DLGAP5,MCM2,HMGB2,MCM3,MCM5,MCM6,MCM7,HMMR,RRM2,TTK,MELK,GINS1,TYMS,AURKA,CKS2,KIF15,NDC80,BUB1B,FEN1,ASPM,DNAJC9,RAD54L,KIF11,FOXM1,VRK1,POLE2,DTL,BIRC5,PRC1,RFC4,CDCA8,CCNA2,ZWINT,RAD51AP1,CCNB2,FANCI,TPX2,H2AFX,GINS2,CDK1,CDC20,KIF18B,ESPL1,PLK4,TOP2A,PCNA,MYBL2
Computational	M15766 GNF2_CCNB2	Neighborhood of CCNB2	MSigDb: C4 - CGN: Cancer Gene Neighborhood (v6.0)	6.136e-67	3.093e-64	5.155e-65	3.506e-64	46	57	NUSAP1,CDCA3,PTTG1,CENPF,DLGAP5,PBK,KIF4A,MCM2,OIP5,HMGB2,HMMR,RRM2,TTK,MELK,TYMS,AURKA,CKS2,NDC80,BUB1,BUB1B,FEN1,ASPM,UBE2S,KIF11,KIF2C,FOXM1,UBE2C,BIRC5,PRC1,RFC4,NCAPH,CDCA8,SPAG5,CCNA2,ZWINT,KIF20A,CCNB2,TPX2,H2AFX,CDK1,CDC20,KIF18B,ESPL1,PLK4,TOP2A,PCNA
Computational	M17151 GNF2_CDC20	Neighborhood of CDC20	MSigDb: C4 - CGN: Cancer Gene Neighborhood (v6.0)	5.223e-63	2.633e-60	3.761e-61	2.558e-60	44	56	NUSAP1,CDCA3,PTTG1,CENPF,DLGAP5,KIF4A,MCM2,HMMR,RRM2,TTK,MELK,TYMS,AURKA,CKS1B,CKS2,NDC80,BUB1,BUB1B,ASPM,UBE2S,PLK1,KIF11,KIF2C,FOXM1,UBE2C,BIRC5,PRC1,NCAPH,CDCA8,SPAG5,CCNA2,ZWINT,KIF20A,CCNB2,TPX2,H2AFX,CDK1,CDC20,KIF18B,ESPL1,PLK4,TOP2A,PCNA,AURKB
Computational	M17594 GNF2_MCM4	Neighborhood of MCM4	MSigDb: C4 - CGN: Cancer Gene Neighborhood (v6.0)	2.038e-60	1.027e-57	1.284e-58	8.732e-58	42	53	NASP,MCM2,MCM3,MCM5,MCM6,MCM7,HMMR,RRM2,TTK,MELK,GINS1,TYMS,AURKA,CKS2,NDC80,CENPM,BUB1,BUB1B,FEN1,ASPM,KIF14,KIF11,FOXM1,POLD1,UBE2C,RFC4,CDCA8,CCNA2,ZWINT,RAD51AP1,LMNB1,ASF1B,CCNB2,FANCI,GINS2,CDC20,KIF18B,ESPL1,TOP2A,MAD2L1,PCNA,AURKB
Computational	M11786 GNF2_RRM1	Neighborhood of RRM1	MSigDb: C4 - CGN: Cancer Gene Neighborhood (v6.0)	2.729e-60	1.375e-57	1.528e-58	1.039e-57	50	88	NUSAP1,CENPF,DLGAP5,NASP,MCM2,HMGB2,MCM3,MCM5,MCM6,MCM7,HMMR,RRM2,TTK,MELK,GINS1,TYMS,AURKA,CKS2,NDC80,CENPM,BUB1B,FEN1,ASPM,KIF14,KIF11,FOXM1,VRK1,DTYMK,UBE2C,DTL,BIRC5,PRC1,RFC4,CDCA8,CCNA2,ZWINT,RAD51AP1,CCNB2,FANCI,H2AFX,GINS2,CDK1,CDC20,KIF18B,SNRPD1,PLK4,SNRPG,TOP2A,PCNA,AURKB
Computational	M12521 GNF2_HMMR	Neighborhood of HMMR	MSigDb: C4 - CGN: Cancer Gene Neighborhood (v6.0)	5.378e-53	2.711e-50	2.711e-51	1.843e-50	37	47	NUSAP1,CDCA3,CENPF,DLGAP5,MCM2,HMMR,RRM2,TTK,MELK,TYMS,AURKA,CKS2,NDC80,BUB1,BUB1B,FEN1,ASPM,PLK1,KIF11,FOXM1,UBE2C,BIRC5,PRC1,CDCA8,CCNA2,ZWINT,KIF20A,CCNB2,GINS2,CDK1,CDC20,KIF18B,ESPL1,PLK4,TOP2A,PCNA,AURKB
MicroRNA	hsa-miR-24:miRTarbase	hsa-miR-24:miRTarbase	miRTarbase	1.987e-10	5.664e-07	5.664e-07	4.833e-06	10	38	CDKN2A,CHEK1,FEN1,POLD1,E2F2,CCNA2,H2AFX,CDK1,PCNA,AURKB
MicroRNA	hsa-miR-149:miRTarbase	hsa-miR-149:miRTarbase	miRTarbase	3.48e-05	0.09918	0.04959	0.4231	3	5	FOXM1,E2F1,MYBL2
Drug	D003375	Coumestrol	CTD	4.192e-112	8.169e-108	8.169e-108	8.541e-107	176	1790	NUSAP1,CDCA3,NRM,CDKN3,KIF18A,EME1,CHAF1B,PTTG1,ILF2,CENPW,NUP85,CENPA,ERCC6L,CENPL,CENPF,DLGAP5,HJURP,SPC25,PBK,NASP,MCM2,OIP5,HMGB2,MCM3,LAGE3,MCM5,MCM6,MCM7,RDM1,CHEK1,HMMR,MCM10,POLA2,RRM2,EZH2,TRIP13,TTK,MELK,DSN1,GINS1,BANF1,ZNRD1,DMXL1,CDC7,PTMA,FANCA,FANCD2,TYMS,CDCA2,AURKA,HAUS8,CKS1B,CKS2,BCL2L12,FANCG,NEK2,C5orf34,NCAPG,KIF15,CENPM,SERINC1,SUV39H1,RECQL4,BUB1,BUB1B,FEN1,ASPM,DNAJC9,PSM…
Drug	C500026	palbociclib	CTD	1.413e-104	2.754e-100	1.377e-100	1.44e-99	80	172	NUSAP1,CDCA3,CDKN2A,CDKN3,PTTG1,CENPA,CENPF,DLGAP5,HJURP,SPC25,PBK,KIF4A,OIP5,HMGB2,MCM7,HMMR,MCM10,POLA2,RRM2,EZH2,TTK,MELK,CDC45,TYMS,AURKA,NEK2,NCAPG,KIF15,NDC80,CENPM,BUB1,FEN1,KIF14,CDT1,PLK1,PSRC1,KIF11,KIFC1,KIF2C,KPNA2,FOXM1,KIF23,DONSON,TROAP,POLE2,UBE2C,TUBB,BIRC5,E2F1,E2F2,STMN1,PRC1,CDCA8,CCNA2,ZWINT,CCNB1,CEP55,KIF20A,CCNE1,CCNF,SPC24,RAD51AP1,LMNB1,UBE2T,ASF1B,TK1,CCNB2,FANCI,TPX2,E…
Drug	C029497	2,3-bis(3'-hydroxybenzyl)butyrolactone	CTD	1.495e-103	2.913e-99	9.711e-100	1.015e-98	136	959	NUSAP1,CDCA3,NRM,CDKN3,KIF18A,EME1,CHAF1B,PTTG1,ILF2,CENPW,CENPA,ERCC6L,CENPL,CENPF,DLGAP5,HJURP,SPC25,PBK,NASP,MCM2,OIP5,HMGB2,MCM3,LAGE3,MCM5,MCM6,MCM7,RDM1,CHEK1,HMMR,MCM10,POLA2,RRM2,EZH2,TRIP13,TTK,MELK,DSN1,GINS1,DMXL1,CDC7,FANCD2,TYMS,CDCA2,AURKA,CKS1B,CKS2,BCL2L12,FANCG,C5orf34,NCAPG,RECQL4,BUB1B,FEN1,ASPM,DNAJC9,KIF14,TIMELESS,CDT1,TACC3,PLK1,IQGAP3,PSRC1,RAD54L,KIF11,KIFC1,KIF2C,CDCA4,R…
Drug	C015559	trimellitic anhydride	CTD	8.865e-101	1.728e-96	4.319e-97	4.515e-96	169	1862	ZMYND19,NUSAP1,CDCA3,MXD3,CDKN3,KIF18A,EME1,CHAF1B,PTTG1,MAGOH,CENPW,CENPA,ERCC6L,CENPL,PSMA4,TRAIP,DLGAP5,SPC25,PBK,NAA10,NASP,MCM2,OIP5,HMGB2,MCM3,MCM5,HMGN2,MCM6,MCM7,RCC1,NUP62,NUF2,CHEK1,HMMR,MCM10,POLA2,RRM2,EZH2,TRIP13,TTK,CENPK,MELK,DSN1,GINS1,RCC2,CDC7,FANCA,FANCD2,TYMS,CDCA2,AURKA,CKS1B,U2AF1,CKS2,NEK2,NCAPG,KIF15,CENPM,SUV39H1,RECQL4,BUB1,BUB1B,FEN1,ASPM,PSMC3IP,KIF14,UBE2S,TIMELESS,CD…
Drug	D008154	Lucanthone	CTD	3.03e-83	5.904e-79	1.093e-79	1.143e-78	73	212	NUSAP1,CDKN3,CENPA,ERCC6L,CENPL,CENPF,DLGAP5,HJURP,SPC25,PBK,KIF4A,HMGB2,NUF2,MND1,HMMR,MCM10,RRM2,EZH2,TTK,CENPK,MELK,CDCA2,AURKA,CKS1B,NEK2,C5orf34,NCAPG,KIF15,NDC80,BUB1,BUB1B,ASPM,PSMC3IP,KIF14,PLK1,IQGAP3,KIF11,KIFC1,KIF22,KIF2C,RAD51,FOXM1,KIF23,POLE2,DTL,BIRC5,DEPDC1,STMN1,PRC1,NCAPH,SPAG5,CCNA2,ZWINT,CCNB1,CEP55,KIF20A,RAD51AP1,UBE2T,CCNB2,FANCI,FAM72A,TPX2,EXO1,CDK1,CDC6,CDC20,CDC25C,ESP…
Drug	C488369	dasatinib	CTD	3.366e-83	6.56e-79	1.093e-79	1.143e-78	94	472	NUSAP1,CDCA3,CDKN3,PTTG1,CENPW,CENPA,CENPL,CENPF,DLGAP5,HJURP,PBK,KIF4A,HMGB2,MCM6,MCM7,MND1,HMMR,MCM10,POLA2,RRM2,EZH2,TRIP13,TTK,CENPK,MELK,DSN1,GINS1,CDC7,FANCA,FANCD2,CDCA2,AURKA,CKS1B,CKS2,NCAPG,NDC80,BUB1,BUB1B,FEN1,ASPM,PSMC3IP,UBE2S,TIMELESS,TACC3,PLK1,IQGAP3,KIFC1,KIF2C,KPNA2,RAD51,FOXM1,FAM72D,VRK1,KIF23,TCF19,RNASEH2A,POLE2,DTL,GINS4,BIRC5,DEPDC1,STMN1,RFC2,PRC1,RFC4,NCAPH,CDCA8,ZWINT,…
Drug	D000069439	Dasatinib	CTD	5.14e-83	1.002e-78	1.431e-79	1.496e-78	94	474	NUSAP1,CDCA3,CDKN3,PTTG1,CENPW,CENPA,CENPL,CENPF,DLGAP5,HJURP,PBK,KIF4A,HMGB2,MCM6,MCM7,MND1,HMMR,MCM10,POLA2,RRM2,EZH2,TRIP13,TTK,CENPK,MELK,DSN1,GINS1,CDC7,FANCA,FANCD2,CDCA2,AURKA,CKS1B,CKS2,NCAPG,NDC80,BUB1,BUB1B,FEN1,ASPM,PSMC3IP,UBE2S,TIMELESS,TACC3,PLK1,IQGAP3,KIFC1,KIF2C,KPNA2,RAD51,FOXM1,FAM72D,VRK1,KIF23,TCF19,RNASEH2A,POLE2,DTL,GINS4,BIRC5,DEPDC1,STMN1,RFC2,PRC1,RFC4,NCAPH,CDCA8,ZWINT,…
Drug	D009151	Mustard Gas	CTD	1.836e-57	3.577e-53	4.472e-54	4.675e-53	109	1275	SECISBP2L,NUSAP1,CDCA3,CDKN3,CENPA,PSMA4,SPTBN1,DLGAP5,HJURP,PSMB4,SPC25,PBK,KIF4A,MCM2,OIP5,HMGB2,MCM3,MCM5,HMGN2,MCM6,CHEK1,MND1,HMMR,MCM10,RRM2,TRIP13,TTK,MELK,CDC7,FANCD2,CDCA2,AURKA,HAUS8,CKS1B,U2AF1,CKS2,NEK2,NCAPG,NDC80,SUV39H1,BUB1,FEN1,ASPM,DNAJC9,KIF14,TACC3,PPIH,DSCC1,PLK1,PSRC1,RAD54L,KIF11,KIFC1,KIF22,KIF2C,CDCA4,KPNA2,RAD51,FOXM1,FAM72D,RANBP1,EXOSC9,VRK1,KIF23,TROAP,POLD1,POLE2,GTS…
Drug	D007840	Latex	CTD	5.348e-56	1.042e-51	1.158e-52	1.211e-51	54	190	NUSAP1,CDCA3,PTTG1,CENPW,CENPF,DLGAP5,KIF4A,OIP5,MND1,HMMR,RRM2,TTK,CDC45,TYMS,CDCA2,AURKA,NCAPG,BUB1B,ASPM,KIF14,IQGAP3,PIF1,KIFC1,KIF2C,RAD51,FOXM1,KIF23,GTSE1,BIRC5,DEPDC1,PRC1,NCAPH,SPAG5,CCNB1,CEP55,KIF20A,SPC24,UBE2T,ASF1B,TK1,CCNB2,FANCI,EXO1,H2AFX,CDK1,CDC6,CDC20,KIF18B,POLQ,CDC25C,ESPL1,PLK4,TOP2A,AURKB
Drug	C057693	troglitazone	CTD	1.914e-54	3.731e-50	3.731e-51	3.9e-50	107	1306	NUSAP1,MXD3,CDKN3,EME1,CHAF1B,PTTG1,CENPA,CENPF,DLGAP5,PBK,NASP,KIF4A,MCM2,HMGB2,MCM3,MCM5,MCM6,MCM7,NUF2,CHEK1,POLA2,RRM2,EZH2,TRIP13,TTK,MELK,CDC7,FANCD2,TYMS,CKS1B,CKS2,FANCG,NEK2,NCAPG,KIF15,SUV39H1,RECQL4,BUB1,BUB1B,FEN1,ASPM,KIF14,TIMELESS,CDT1,PPIH,PLK1,IQGAP3,RAD54L,KIF11,KIF2C,RAD51,FOXM1,RANBP1,VRK1,KIF23,RNASEH2A,POLD1,DTYMK,POLE2,CHAF1A,GTSE1,UBE2C,HIPK2,BIRC5,E2F1,E2F2,STMN1,XRCC3,RF…
Disease	C0035335	Retinoblastoma	DisGeNET Curated	1.038e-10	2.992e-07	2.098e-07	1.792e-06	32	539	CDKN2A,CDKN3,MCM2,RCC1,CHEK1,EZH2,TYMS,SUV39H1,RECQL4,KIF14,PLK1,KPNA2,FOXM1,VRK1,POLD1,UBE2C,BIRC5,E2F1,STMN1,CCNB1,CCNE1,NXT1,CHEK2,EXO1,H2AFX,UHRF1,CDK1,CDC25C,MAD2L1,PCNA,HDGF,MYBL2
Disease	C0015625	Fanconi Anemia	DisGeNET Curated	1.456e-10	4.195e-07	2.098e-07	1.792e-06	23	285	SPTBN1,CHEK1,TTK,FANCA,FANCD2,FANCG,MAD2L2,RAD51,POLD1,E2F1,STMN1,XRCC3,CCNB1,CCNE1,RUVBL1,UBE2T,FANCI,EXO1,H2AFX,UHRF1,GINS2,CDK1,PCNA
Disease	C0025958	Microcephaly	DisGeNET Curated	2.248e-09	6.479e-06	2.157e-06	1.843e-05	16	152	CENPF,TRAIP,CHEK1,BUB1B,ASPM,KIF14,PLK1,WDR62,KIF11,VRK1,TUBB,EXOSC3,TSEN54,CDC6,SLC25A19,PLK4
Disease	C3539878	Triple Negative Breast Neoplasms	DisGeNET BeFree	3.702e-09	1.067e-05	2.157e-06	1.843e-05	31	588	NUSAP1,CDKN2A,CENPA,NUP62,CHEK1,EZH2,TTK,CENPK,CDC7,FANCA,FANCD2,NEK2,SUV39H1,ASPM,PSMC3IP,KIF14,PLK1,RAD51,FOXM1,BIRC5,E2F1,XRCC3,SPAG5,FANCI,CHEK2,H2AFX,CDK1,CDC20,NBR1,TOP2A,PCNA
Disease	C0272027	Pyridoxine-responsive sideroblastic anemia	DisGeNET Curated	3.742e-09	1.078e-05	2.157e-06	1.843e-05	7	17	FANCA,FANCD2,FANCG,MAD2L2,RAD51,UBE2T,FANCI
Disease	C0679427	myeloblastosis	DisGeNET BeFree	7.976e-09	2.299e-05	3.831e-06	3.273e-05	8	28	CKS1B,FOXM1,UBE2C,E2F1,CCNB1,PKMYT1,TOP2A,MYBL2
Disease	C2749463	Radial aplasia/hypoplasia	DisGeNET Curated	1.087e-08	3.132e-05	3.945e-06	3.37e-05	8	29	FANCA,FANCD2,FANCG,RECQL4,MAD2L2,RAD51,UBE2T,FANCI
Disease	C0005695	Bladder Neoplasm	DisGeNET Curated	1.095e-08	3.156e-05	3.945e-06	3.37e-05	44	1109	CDKN2A,PSMB2,PBK,MCM2,MCM5,MCM7,CHEK1,RRM2,EZH2,TTK,PTMA,FANCA,TYMS,AURKA,BCL2L12,BUB1,TACC3,PLK1,KPNA2,RAD51,FOXM1,POLD1,HIPK2,BIRC5,E2F1,DEPDC1,STMN1,XRCC3,PRC1,CCNB1,CEP55,CCNE1,LIG1,CCNB2,NXT1,CHEK2,UHRF1,CDK1,CDC20,DDX39A,ESPL1,TOP2A,MAD2L1,PCNA
Disease	C3469521	FANCONI ANEMIA, COMPLEMENTATION GROUP A (disorder)	DisGeNET Curated	1.869e-08	5.387e-05	5.986e-06	5.114e-05	19	252	SPTBN1,CHEK1,TTK,FANCA,FANCD2,FANCG,RAD51,POLD1,E2F1,STMN1,CCNB1,UBE2T,FANCI,EXO1,H2AFX,UHRF1,GINS2,CDK1,PCNA
Disease	C0376628	Chromosome Breakage	DisGeNET Curated	2.556e-08	7.367e-05	7.367e-06	6.294e-05	8	32	FANCA,FANCD2,FANCG,MAD2L2,RAD51,UBE2T,FANCI,H2AFX

## Sheet: Supplementary Table 6
Category	ID	Name	Source	p-value	q-value Bonferroni	q-value FDR B&H	q-value FDR B&Y	Hit Count in Query List	Hit Count in Genome	Hit in Query List
GO: Molecular Function	GO:0000989	transcription factor activity, transcription factor binding		0.0002449	0.08938	0.04709	0.305	10	610	NCOR2,NR2C2,HDAC4,NACC2,RAD54L2,MLXIP,SPEN,HCFC1,MNT,NOTCH1
GO: Molecular Function	GO:0000988	transcription factor activity, protein binding		0.000258	0.09417	0.04709	0.305	10	614	NCOR2,NR2C2,HDAC4,NACC2,RAD54L2,MLXIP,SPEN,HCFC1,MNT,NOTCH1
GO: Cellular Component	GO:0044429	mitochondrial part		4.183e-05	0.01088	0.01088	0.06678	14	987	PDPR,MAVS,MRPL27,UQCRQ,HMGCL,CHCHD1,NDUFA2,HERC2,MTHFS,MLXIP,NDUFB1,ECHS1,ATP5H,NDUFV2
GO: Cellular Component	GO:0031966	mitochondrial membrane		0.0001163	0.03024	0.01443	0.08862	11	694	MAVS,MRPL27,UQCRQ,HMGCL,CHCHD1,NDUFA2,HERC2,MLXIP,NDUFB1,ATP5H,NDUFV2
GO: Cellular Component	GO:0005740	mitochondrial envelope		0.0001943	0.05052	0.01443	0.08862	11	736	MAVS,MRPL27,UQCRQ,HMGCL,CHCHD1,NDUFA2,HERC2,MLXIP,NDUFB1,ATP5H,NDUFV2
GO: Cellular Component	GO:0005743	mitochondrial inner membrane		0.0002221	0.05774	0.01443	0.08862	9	507	MRPL27,UQCRQ,HMGCL,CHCHD1,NDUFA2,HERC2,NDUFB1,ATP5H,NDUFV2
GO: Cellular Component	GO:0017053	transcriptional repressor complex		0.0003089	0.08031	0.01606	0.09862	4	79	NCOR2,HDAC4,NACC2,SPEN
GO: Cellular Component	GO:0019866	organelle inner membrane		0.000484	0.1259	0.01792	0.11	9	564	MRPL27,UQCRQ,HMGCL,CHCHD1,NDUFA2,HERC2,NDUFB1,ATP5H,NDUFV2
GO: Cellular Component	GO:0070469	respiratory chain		0.0005078	0.132	0.01792	0.11	4	90	UQCRQ,NDUFA2,NDUFB1,NDUFV2
GO: Cellular Component	GO:0005747	mitochondrial respiratory chain complex I		0.0007231	0.188	0.01792	0.11	3	43	NDUFA2,NDUFB1,NDUFV2
GO: Cellular Component	GO:0030964	NADH dehydrogenase complex		0.0007231	0.188	0.01792	0.11	3	43	NDUFA2,NDUFB1,NDUFV2
GO: Cellular Component	GO:0045271	respiratory chain complex I		0.0007231	0.188	0.01792	0.11	3	43	NDUFA2,NDUFB1,NDUFV2
Domain	IPR004939	APC_su10/DOC_dom	InterPro	2.401e-06	0.00151	0.0003775	0.002651	3	7	MYCBP2,HERC2,ZZEF1
Domain	PS51284	DOC	PROSITE	2.401e-06	0.00151	0.0003775	0.002651	3	7	MYCBP2,HERC2,ZZEF1
Domain	PF03256	ANAPC10	Pfam	2.401e-06	0.00151	0.0003775	0.002651	3	7	MYCBP2,HERC2,ZZEF1
Domain	SM01337	APC10	SMART	2.401e-06	0.00151	0.0003775	0.002651	3	7	MYCBP2,HERC2,ZZEF1
Domain	SM00717	SANT	SMART	0.001182	0.7435	0.03329	0.2337	3	50	NCOR2,EP400,CRAMP1
Domain	IPR001005	SANT/Myb	InterPro	0.001325	0.8333	0.03329	0.2337	3	52	NCOR2,EP400,CRAMP1
Domain	SM00800	uDENN	SMART	0.001507	0.9482	0.03329	0.2337	2	14	SBF1,DENND4B
Domain	PF03456	uDENN	Pfam	0.001735	1	0.03329	0.2337	2	15	SBF1,DENND4B
Domain	SM00801	dDENN	SMART	0.001977	1	0.03329	0.2337	2	16	SBF1,DENND4B
Domain	PF03455	dDENN	Pfam	0.001977	1	0.03329	0.2337	2	16	SBF1,DENND4B
Pathway	1270121	The citric acid (TCA) cycle and respiratory electron transport	BioSystems: REACTOME	8.271e-05	0.04433	0.02807	0.1926	6	171	PDPR,UQCRQ,NDUFA2,NDUFB1,ATP5H,NDUFV2
Pathway	169345	Notch signaling pathway	BioSystems: Pathway Interaction Database	0.0001047	0.05614	0.02807	0.1926	4	58	NCOR2,CBL,SPEN,NOTCH1
Pathway	1270127	Respiratory electron transport, ATP synthesis by chemiosmotic coupling, and heat production by uncoupling proteins.	BioSystems: REACTOME	0.0001907	0.1022	0.02901	0.1991	5	126	UQCRQ,NDUFA2,NDUFB1,ATP5H,NDUFV2
Pathway	82942	Oxidative phosphorylation	BioSystems: KEGG	0.0002454	0.1315	0.02901	0.1991	5	133	UQCRQ,NDUFA2,NDUFB1,ATP5H,NDUFV2
Pathway	83098	Parkinson's disease	BioSystems: KEGG	0.0003324	0.1782	0.02901	0.1991	5	142	UQCRQ,NDUFA2,NDUFB1,ATP5H,NDUFV2
Pathway	138062	Signaling events mediated by HDAC Class II	BioSystems: Pathway Interaction Database	0.0003971	0.2128	0.02901	0.1991	3	34	NCOR2,HDAC4,SUMO1
Pathway	862188	Non-alcoholic fatty liver disease (NAFLD)	BioSystems: KEGG	0.0004148	0.2224	0.02901	0.1991	5	149	UQCRQ,NDUFA2,MLXIP,NDUFB1,NDUFV2
Pathway	M2499	CARM1 and Regulation of the Estrogen Receptor	MSigDB C2 BIOCARTA (v6.0)	0.000433	0.2321	0.02901	0.1991	3	35	NCOR2,HDAC4,SPEN
Pathway	SMP00073	Butyrate Metabolism	SMPDB	0.0004898	0.2625	0.02917	0.2002	2	8	HMGCL,ECHS1
Pathway	1268838	Organelle biogenesis and maintenance	BioSystems: REACTOME	0.0005671	0.304	0.0304	0.2086	7	341	TTBK2,CLASP1,IFT20,PKD1,MRPL27,CHCHD1,HCFC1
Pubmed	16751776	A germline-specific class of small RNAs binds mammalian Piwi proteins.	Pubmed	6.419e-15	2.926e-11	2.926e-11	2.634e-10	14	449	MAFG,TTBK2,SLC7A1,NR2C2,PDPR,FAM168B,SBF1,RBM33,IFT20,WASF2,HERC2,CBL,ATP5H,SOCS7
Pubmed	25609649	Proteomic analyses reveal distinct chromatin-associated and soluble transcription factor complexes.	Pubmed	1.556e-13	7.096e-10	3.548e-10	3.194e-09	16	852	NCOR2,NR2C2,MDN1,EP400,NACC2,WASF2,DPY30,MRPL27,CAMSAP1,SPEN,ANKRD52,HCFC1,MNT,FOXK1,NOTCH1,NDUFV2
Pubmed	17081983	Global, in vivo, and site-specific phosphorylation dynamics in signaling networks.	Pubmed	1.164e-11	5.305e-08	1.768e-08	1.592e-07	18	1546	NCOR2,ZNF142,MDN1,POM121,MYCBP2,RBM33,SUMO1,WASF2,YLPM1,PKD1,ANKRD11,RAPGEF1,GPATCH8,HERC2,SPEN,HCFC1,FOXK1,RAI1
Pubmed	26638075	A Dynamic Protein Interaction Landscape of the Human Centrosome-Cilium Interface.	Pubmed	1.637e-10	7.465e-07	1.866e-07	1.68e-06	18	1820	SLC12A6,SLC7A1,CLASP1,IFT20,WASF2,SAMD4B,YLPM1,DERL2,TNRC6B,HERC2,CAMSAP1,CBL,SMCR8,SPEN,ANKRD52,HCFC1,NOTCH1,NDUFV2
Pubmed	20877624	Genetic variants in nuclear-encoded mitochondrial genes influence AIDS progression.	Pubmed	1.399e-07	0.0006379	0.0001276	0.001149	11	926	PDPR,MAVS,MRPL27,UQCRQ,HMGCL,CHCHD1,NDUFA2,MTHFS,ECHS1,ATP5H,NDUFV2
Pubmed	27499296	Mitochondrial Protein Interaction Mapping Identifies Regulators of Respiratory Chain Function.	Pubmed	1.965e-07	0.0008958	0.0001493	0.001344	8	409	MAVS,UQCRQ,CHCHD1,NDUFA2,MTHFS,NDUFB1,ATP5H,NDUFV2
Pubmed	15302935	Large-scale characterization of HeLa cell nuclear phosphoproteins.	Pubmed	2.493e-07	0.001136	0.0001624	0.001462	10	773	NCOR2,MDN1,EP400,SSH1,CLASP1,MYCBP2,SAMD4B,YLPM1,GPATCH8,SPEN
Pubmed	24711643	Identifying biological pathways that underlie primordial short stature using network analysis.	Pubmed	3.786e-07	0.001726	0.0002158	0.001942	11	1024	MDN1,POM121,EP400,MYCBP2,SUMO1,YLPM1,LMAN2,HERC2,ECHS1,SPEN,ATP5H
Pubmed	22586326	Functional proteomics establishes the interaction of SIRT7 with chromatin remodeling complexes and expands its role in regulation of RNA polymerase I transcription.	Pubmed	6.141e-07	0.002799	0.0003111	0.0028	9	653	MDN1,SBF1,MYCBP2,YLPM1,HERC2,SPEN,ANKRD52,HCFC1,RAI1
Pubmed	26161557	Mutagenesis Study Reveals the Rim of Catalytic Entry Site of HDAC4 and -5 as the Major Binding Surface of SMRT Corepressor.	Pubmed	2.217e-06	0.01011	0.0008804	0.007925	2	2	NCOR2,HDAC4
Interaction	int:FOXK2	FOXK2 interactions		1.438e-06	0.003848	0.003848	0.03259	7	126	NCOR2,CBX6,DPY30,ANKRD52,HCFC1,MNT,FOXK1
Interaction	int:NDUFS3	NDUFS3 interactions		5.246e-06	0.01403	0.007017	0.05942	7	153	LMAN2,UQCRQ,NDUFA2,MTHFS,NDUFB1,ATP5H,NDUFV2
Interaction	int:ATXN1	ATXN1 interactions		1.938e-05	0.05185	0.01728	0.1464	8	259	NCOR2,POM121,HDAC4,SUMO1,RAPGEF1,GPATCH8,RAD54L2,SPEN
Cytoband	9q34.3	9q34.3		0.0001497	0.01063	0.006653	0.03225	4	115	NACC2,RAPGEF1,CAMSAP1,NOTCH1
Cytoband	15q13	15q13		0.0001874	0.01331	0.006653	0.03225	2	9	SLC12A6,HERC2
Gene Family	775	Myb/SANT domain containing|Trinucleotide repeat containing	genenames.org	6.727e-05	0.003565	0.001783	0.008124	3	25	NCOR2,EP400,TNRC6B
Gene Family	504	DENN/MADD domain containing|Pleckstrin homology domain containing|Myotubularins	genenames.org	6.727e-05	0.003565	0.001783	0.008124	3	25	SBF1,DENND4B,SMCR8
Gene Family	532	GATA zinc finger domain containing|Myb/SANT domain containing	genenames.org	0.0006431	0.03409	0.01136	0.05178	3	53	NCOR2,EP400,CRAMP1
Gene Family	91	Zinc fingers ZZ-type	genenames.org	0.001479	0.07838	0.01959	0.08929	2	18	HERC2,ZZEF1
Gene Family	1150	NADH:ubiquinone oxidoreductase supernumerary subunits	genenames.org	0.004103	0.2174	0.04349	0.1982	2	30	NDUFA2,NDUFB1
Coexpression	M6128	Genes down-regulated in CD4 [GeneID=920] T cells activated by anti-CD3 and anti-CD28: TGFB1 [GeneID=7040] and IL-12 (2h) versus IL4 [GeneID=3565] (2h).	MSigDB C7: Immunologic Signatures (v6.0)	4.111e-07	0.001776	0.001776	0.01589	8	197	TNRC6B,ASB1,GPATCH8,ZZEF1,SMCR8,SPEN,SOCS7,NDUFV2
Coexpression	M4244	Genes up-regulated in comparison of CD4 [GeneID=920] T cells treated with IL4 [GeneID=3565] and anti-IL12 at 0.5 h versus those at 72 h.	MSigDB C7: Immunologic Signatures (v6.0)	5.663e-06	0.02447	0.005227	0.04677	7	198	HDAC4,SAMD4B,MLXIP,ZZEF1,SMCR8,MNT,NOTCH1
Coexpression	M5332	Genes up-regulated in comparison of control polymorphonuclear leukocytes (PMN) at 6 h versus PMN treated with F. tularensis vaccine at 6 h.	MSigDB C7: Immunologic Signatures (v6.0)	5.854e-06	0.02529	0.005227	0.04677	7	199	TMEM219,MAVS,DPY30,FAM53B,NDUFA2,MLXIP,NDUFB1
Coexpression	M8497	Genes up-regulated in B16 melanoma (day 7): untreated versus mock treatment during adoptive transfer therapy.	MSigDB C7: Immunologic Signatures (v6.0)	6.049e-06	0.02613	0.005227	0.04677	7	200	NCOR2,KLF13,MYCBP2,TGFBRAP1,TNRC6B,CRAMP1,FOXK1
Coexpression	M5859	Genes down-regulated in comparison of monocytes treated with 5000 ng/ml LPS (TLR4 agonist) versus monocytes treated with control IgG.	MSigDB C7: Immunologic Signatures (v6.0)	6.049e-06	0.02613	0.005227	0.04677	7	200	KLF13,IFT20,WASF2,MLXIP,CBL,MNT,FOXK1
Coexpression	19525976-SuppTable5b	Human Lung_Chitale09_103genes	GeneSigDB	8.033e-06	0.0347	0.005783	0.05175	5	79	MGAT5,FBXL18,CBX6,HMGCL,PPCS
Coexpression	M2094	Genes with promoters occupied by PML-RARA fusion [GeneID=5371,5914] protein in acute promyelocytic leukemia(APL) cells NB4 and two APL primary blasts, based on Chip-seq data.	MSigDB C2: CGP Curated Gene Sets (v6.0)	2.788e-05	0.1204	0.0172	0.1539	9	456	NCOR2,HDAC4,KLF13,ANKRD11,RAPGEF1,FAM53B,GPATCH8,ZZEF1,CRAMP1
Coexpression	M2228	Genes down-regulated in erythroid progenitor cells from fetal livers of E13.5 embryos with KLF1 [GeneID=10661] knockout compared to those from the wild type embryos.	MSigDB C2: CGP Curated Gene Sets (v6.0)	3.233e-05	0.1397	0.01737	0.1554	19	1972	NCOR2,NR2C2,FAM168B,EP400,CLASP1,MYCBP2,SUMO1,TGFBRAP1,DPY30,LMAN2,GPATCH8,MLXIP,CBL,ZZEF1,SMCR8,CRAMP1,FOXK1,NOTCH1,SOCS7
Coexpression	M19988	Genes down-regulated in metastatic breast cancer tumors having type 2 amplification in the 20q13 region; involves MYBL2, STK6 and ZNF217 [GeneID=4605;6790;7764]	MSigDB C2: CGP Curated Gene Sets (v6.0)	3.804e-05	0.1643	0.01737	0.1554	6	180	ZNF142,FBXL18,RAPGEF1,MLXIP,HCFC1,CCDC93
Coexpression	M2355	Proteins associated with ZNF143 [GeneID=7702] in HeLa cells, based on MudPIT analysis.	MSigDB C2: CGP Curated Gene Sets (v6.0)	5.846e-05	0.2526	0.01737	0.1554	3	22	RBM33,JRK,HCFC1
Computational	M19044 MODULE_152	Oxidative phosphorylation and ATP synthesis.	MSigDb: C4 - CM: Cancer Modules (v6.0)	2.528e-05	0.006826	0.005586	0.03451	6	124	UQCRQ,NDUFA2,NDUFB1,ECHS1,ATP5H,NDUFV2
Computational	M2625 MODULE_22	Genes in the cancer module 22.	MSigDb: C4 - CM: Cancer Modules (v6.0)	5.941e-05	0.01604	0.005586	0.03451	4	45	NDUFA2,NDUFB1,ATP5H,NDUFV2
Computational	M16474 MODULE_62	Genes in the cancer module 62.	MSigDb: C4 - CM: Cancer Modules (v6.0)	6.207e-05	0.01676	0.005586	0.03451	5	89	UQCRQ,NDUFA2,NDUFB1,ATP5H,NDUFV2
Computational	M15800 MODULE_42	Genes in the cancer module 42.	MSigDb: C4 - CM: Cancer Modules (v6.0)	0.0002193	0.05921	0.0148	0.09144	3	25	NDUFA2,NDUFB1,NDUFV2
Computational	M10738 MODULE_77	Genes in the cancer module 77.	MSigDb: C4 - CM: Cancer Modules (v6.0)	0.0003092	0.08348	0.0167	0.1031	3	28	NDUFA2,NDUFB1,NDUFV2
MicroRNA	hsa-miR-31:TargetScan	hsa-miR-31:TargetScan	TargetScan	2.797e-08	7.401e-05	7.401e-05	0.000626	10	232	PDPR,SSH1,KLF13,YLPM1,TNRC6B,FAM53B,LMAN2,MLXIP,CBL,ANKRD52
MicroRNA	hsa-miR-200b:TargetScan	hsa-miR-200b:TargetScan	TargetScan	2.83e-06	0.007489	0.001872	0.01584	14	798	MAFG,NCOR2,NR2C2,HDAC4,SBF1,CLASP1,KLF13,PKD1,RAPGEF1,GPATCH8,CBL,ANKRD52,FOXK1,NOTCH1
MicroRNA	hsa-miR-429:TargetScan	hsa-miR-429:TargetScan	TargetScan	2.83e-06	0.007489	0.001872	0.01584	14	798	MAFG,NCOR2,NR2C2,HDAC4,SBF1,CLASP1,KLF13,PKD1,RAPGEF1,GPATCH8,CBL,ANKRD52,FOXK1,NOTCH1
MicroRNA	hsa-miR-200c:TargetScan	hsa-miR-200c:TargetScan	TargetScan	2.83e-06	0.007489	0.001872	0.01584	14	798	MAFG,NCOR2,NR2C2,HDAC4,SBF1,CLASP1,KLF13,PKD1,RAPGEF1,GPATCH8,CBL,ANKRD52,FOXK1,NOTCH1
MicroRNA	hsa-miR-135b:TargetScan	hsa-miR-135b:TargetScan	TargetScan	3.385e-05	0.08958	0.008205	0.0694	10	510	SLC12A6,HDAC4,CLASP1,KLF13,TNRC6B,MAPKBP1,ANKRD52,CRAMP1,FOXK1,SYNGAP1
MicroRNA	hsa-miR-135a:TargetScan	hsa-miR-135a:TargetScan	TargetScan	3.385e-05	0.08958	0.008205	0.0694	10	510	SLC12A6,HDAC4,CLASP1,KLF13,TNRC6B,MAPKBP1,ANKRD52,CRAMP1,FOXK1,SYNGAP1
MicroRNA	hsa-miR-31:PITA	hsa-miR-31:PITA_TOP	PITA	3.561e-05	0.09421	0.008205	0.0694	7	229	MAFG,NR2C2,KLF13,YLPM1,TNRC6B,LMAN2,GPATCH8
MicroRNA	hsa-miR-302d:PITA	hsa-miR-302d:PITA_TOP	PITA	6.478e-05	0.1714	0.008205	0.0694	10	551	NR2C2,FAM168B,HDAC4,SBF1,KLF13,DERL2,TNRC6B,GPATCH8,MNT,CRAMP1
MicroRNA	hsa-miR-520b:PITA	hsa-miR-520b:PITA_TOP	PITA	6.478e-05	0.1714	0.008205	0.0694	10	551	NR2C2,FAM168B,HDAC4,SBF1,KLF13,DERL2,TNRC6B,GPATCH8,MNT,CRAMP1
MicroRNA	hsa-miR-373:PITA	hsa-miR-373:PITA_TOP	PITA	6.478e-05	0.1714	0.008205	0.0694	10	551	NR2C2,FAM168B,HDAC4,SBF1,KLF13,DERL2,TNRC6B,GPATCH8,MNT,CRAMP1
Drug	1729_UP	Iobenguane sulfate; Up 200; 10.8uM; HL60; HG-U133A	Broad Institute CMAP	6.254e-07	0.006577	0.006577	0.0647	8	199	PRDM11,ZNF142,FAM168B,SBF1,KLF13,CBX6,YLPM1,NOTCH1
Drug	C044887	beta-methylcholine	CTD	1.254e-06	0.01319	0.006593	0.06486	20	1656	SLC7A1,ZNF142,PDPR,YIPF1,SBF1,KLF13,RBM33,DPY30,ANKRD11,RAPGEF1,ASB1,MTHFS,CAMSAP1,CBL,ZZEF1,SPEN,HCFC1,MNT,CRAMP1,RAI1
Disease	C4020875	Mental and motor retardation	DisGeNET Curated	3.779e-06	0.004702	0.002351	0.01811	11	614	SLC12A6,HDAC4,ANKRD11,UQCRQ,NDUFA2,HERC2,CBL,ECHS1,RAI1,NDUFV2,SYNGAP1
Disease	C1864897	Cognitive delay	DisGeNET Curated	3.779e-06	0.004702	0.002351	0.01811	11	614	SLC12A6,HDAC4,ANKRD11,UQCRQ,NDUFA2,HERC2,CBL,ECHS1,RAI1,NDUFV2,SYNGAP1
Disease	C0026827	Muscle hypotonia	DisGeNET Curated	1.44e-05	0.01791	0.005971	0.046	10	575	HDAC4,UQCRQ,NDUFA2,HERC2,CBL,ECHS1,HCFC1,RAI1,NDUFV2,SYNGAP1
Disease	C0557874	Global developmental delay	DisGeNET Curated	2.713e-05	0.03374	0.008436	0.06499	11	757	SLC12A6,HDAC4,ANKRD11,UQCRQ,NDUFA2,HERC2,CBL,ECHS1,RAI1,NDUFV2,SYNGAP1
Disease	C1839039	Highly variable clinical phenotype	DisGeNET Curated	0.0001357	0.1688	0.0211	0.1626	5	152	KLF13,NDUFA2,CBL,NOTCH1,NDUFV2
Disease	C1837514	Phenotypic variability	DisGeNET Curated	0.0001357	0.1688	0.0211	0.1626	5	152	KLF13,NDUFA2,CBL,NOTCH1,NDUFV2
Disease	C1866210	Highly variable phenotype, even within families	DisGeNET Curated	0.0001357	0.1688	0.0211	0.1626	5	152	KLF13,NDUFA2,CBL,NOTCH1,NDUFV2
Disease	C1850667	Highly variable phenotype and severity	DisGeNET Curated	0.0001357	0.1688	0.0211	0.1626	5	152	KLF13,NDUFA2,CBL,NOTCH1,NDUFV2
Disease	C1167918	CSF lactate increased	DisGeNET Curated	0.0001682	0.2092	0.02243	0.1728	3	33	NDUFA2,ECHS1,NDUFV2
Disease	C0423903	Low intelligence	DisGeNET Curated	0.0002291	0.285	0.02243	0.1728	9	649	SLC12A6,HDAC4,ANKRD11,UQCRQ,NDUFA2,HERC2,HCFC1,RAI1,SYNGAP1

## Sheet: Supplementary Table 7
Category	ID	Name	Source	p-value	q-value Bonferroni	q-value FDR B&H	q-value FDR B&Y	Hit Count in Query List	Hit Count in Genome	Hit in Query List
GO: Molecular Function	GO:0003723	RNA binding		1.963e-31	2.811e-28	2.811e-28	2.205e-27	172	1632	BRIX1,NUSAP1,SF3B4,ABCF1,FBL,MARS,MAZ,LRRC59,NOL10,EZH2,TUBA1B,WDR75,XPO5,NIP7,MKI67,RBM14,ALDH6A1,RBM38,MYBBP1A,SFPQ,SORBS2,CHERP,NOP56,RAE1,TRA2B,NOP16,RNASEH2A,DHX37,CPEB3,LYAR,DDX55,THOC3,RPUSD1,PABPC1,DDX27,YARS,DNAJC2,RRP1,KHSRP,SRRT,RAD51AP1,NSUN5,NOP58,IGF2BP3,NUDT1,CPEB4,PUS1,PDCD11,EIF3B,LSM2,RNASEH1,SNRPA,SNRPA1,SNRPB,SNRPC,SNRPD1,CPSF3,SNRPF,ZMAT1,KDM1A,UBAP2,RRP1B,AUH,PPRC1,UTP14A,HN…
GO: Molecular Function	GO:0005524	ATP binding		2.143e-18	3.069e-15	1.534e-15	1.204e-14	134	1475	KIF18A,ABCF1,BRIP1,ATAD5,MARS,LRRK2,MCM2,MCM3,MCM4,MCM5,MCM6,MCM7,RRM1,ABCA8,CDC7,MKI67,PIF1,RAD54L,TTF2,DHX37,MYO19,MSH2,CAMK1,DDX55,SMC2,ATAD2,DDX27,YARS,RUVBL1,UBE2T,CCT5,CHTF18,FLAD1,TPX2,SMARCA4,POLQ,FIGNL1,PLK4,MCM8,GARS,GART,PBK,SRPK1,BLM,GMPS,AURKA,NEK2,GLUD1,BUB1,BUB1B,UBE2S,NME1,KIF2C,CAD,GRK6,UBE2C,PKMYT1,CCT6A,MSH6,TK1,TK2,PEBP1,CHEK2,MASTL,KIF4B,CDK1,CDC6,PCCA,TOP2A,CDK2,AURKB,HELLS,…
GO: Molecular Function	GO:0030554	adenyl nucleotide binding		7.296e-18	1.045e-14	3.403e-15	2.669e-14	136	1530	KIF18A,ABCF1,BRIP1,ATAD5,MARS,LRRK2,MCM2,MCM3,MCM4,MCM5,MCM6,MCM7,RRM1,ABCA8,CDC7,MKI67,PIF1,RAD54L,TTF2,DHX37,MYO19,MSH2,CAMK1,DDX55,SMC2,ATAD2,DDX27,YARS,RUVBL1,UBE2T,CCT5,CHTF18,FLAD1,TPX2,SMARCA4,POLQ,FIGNL1,PLK4,MCM8,GARS,GART,PBK,SRPK1,BLM,GMPS,AURKA,NEK2,GLUD1,BUB1,BUB1B,UBE2S,NME1,KIF2C,CAD,GRK6,UBE2C,PKMYT1,CCT6A,MSH6,TK1,TK2,PEBP1,CHEK2,MASTL,KIF4B,CDK1,CDC6,PCCA,TOP2A,CDK2,AURKB,HELLS,…
GO: Molecular Function	GO:0032559	adenyl ribonucleotide binding		9.506e-18	1.361e-14	3.403e-15	2.669e-14	135	1518	KIF18A,ABCF1,BRIP1,ATAD5,MARS,LRRK2,MCM2,MCM3,MCM4,MCM5,MCM6,MCM7,RRM1,ABCA8,CDC7,MKI67,PIF1,RAD54L,TTF2,DHX37,MYO19,MSH2,CAMK1,DDX55,SMC2,ATAD2,DDX27,YARS,RUVBL1,UBE2T,CCT5,CHTF18,FLAD1,TPX2,SMARCA4,POLQ,FIGNL1,PLK4,MCM8,GARS,GART,PBK,SRPK1,BLM,GMPS,AURKA,NEK2,GLUD1,BUB1,BUB1B,UBE2S,NME1,KIF2C,CAD,GRK6,UBE2C,PKMYT1,CCT6A,MSH6,TK1,TK2,PEBP1,CHEK2,MASTL,KIF4B,CDK1,CDC6,PCCA,TOP2A,CDK2,AURKB,HELLS,…
GO: Molecular Function	GO:0016462	pyrophosphatase activity		1.101e-16	1.576e-13	2.467e-14	1.935e-13	89	827	KIF18A,ABCF1,BRIP1,LSG1,LRRK2,MCM2,MCM3,MCM4,MCM5,MCM6,MCM7,ABCA8,CDC45,TUBA1B,PIF1,RAD54L,TTF2,DHX37,MYO19,TUBB,GINS4,MSH2,DDX55,ATAD2,DDX27,TRIM23,RHOB,RUVBL1,NUDT1,CHTF18,SMARCA4,GINS2,POLQ,FIGNL1,MCM8,BLM,GMPS,GTPBP3,KIF2C,TUBA1C,MSH6,KIF4B,CGNL1,TOP2A,HELLS,GTPBP4,CENPE,KIF24,TUBG1,ABCB1,EFTUD2,CLU,RECQL4,RAD54B,GNL2,DSCC1,KIF23,XRCC2,XRCC3,KIF20B,PRIM1,PRIM2,KIF18B,DHX34,RAD18,ERCC6L,EIF4A3…
GO: Molecular Function	GO:0016818	hydrolase activity, acting on acid anhydrides, in phosphorus-containing anhydrides		1.279e-16	1.831e-13	2.467e-14	1.935e-13	89	829	KIF18A,ABCF1,BRIP1,LSG1,LRRK2,MCM2,MCM3,MCM4,MCM5,MCM6,MCM7,ABCA8,CDC45,TUBA1B,PIF1,RAD54L,TTF2,DHX37,MYO19,TUBB,GINS4,MSH2,DDX55,ATAD2,DDX27,TRIM23,RHOB,RUVBL1,NUDT1,CHTF18,SMARCA4,GINS2,POLQ,FIGNL1,MCM8,BLM,GMPS,GTPBP3,KIF2C,TUBA1C,MSH6,KIF4B,CGNL1,TOP2A,HELLS,GTPBP4,CENPE,KIF24,TUBG1,ABCB1,EFTUD2,CLU,RECQL4,RAD54B,GNL2,DSCC1,KIF23,XRCC2,XRCC3,KIF20B,PRIM1,PRIM2,KIF18B,DHX34,RAD18,ERCC6L,EIF4A3…
GO: Molecular Function	GO:0017111	nucleoside-triphosphatase activity		1.297e-16	1.857e-13	2.467e-14	1.935e-13	86	785	KIF18A,ABCF1,BRIP1,LSG1,LRRK2,MCM2,MCM3,MCM4,MCM5,MCM6,MCM7,ABCA8,CDC45,TUBA1B,PIF1,RAD54L,TTF2,DHX37,MYO19,TUBB,GINS4,MSH2,DDX55,ATAD2,DDX27,TRIM23,RHOB,RUVBL1,NUDT1,CHTF18,SMARCA4,GINS2,POLQ,FIGNL1,MCM8,BLM,GTPBP3,KIF2C,TUBA1C,MSH6,KIF4B,CGNL1,TOP2A,HELLS,GTPBP4,CENPE,KIF24,TUBG1,ABCB1,EFTUD2,CLU,RECQL4,RAD54B,GNL2,DSCC1,KIF23,XRCC2,XRCC3,KIF20B,PRIM1,PRIM2,KIF18B,DHX34,RAD18,ERCC6L,EIF4A3,KIF4…
GO: Molecular Function	GO:0016817	hydrolase activity, acting on acid anhydrides		1.378e-16	1.974e-13	2.467e-14	1.935e-13	89	830	KIF18A,ABCF1,BRIP1,LSG1,LRRK2,MCM2,MCM3,MCM4,MCM5,MCM6,MCM7,ABCA8,CDC45,TUBA1B,PIF1,RAD54L,TTF2,DHX37,MYO19,TUBB,GINS4,MSH2,DDX55,ATAD2,DDX27,TRIM23,RHOB,RUVBL1,NUDT1,CHTF18,SMARCA4,GINS2,POLQ,FIGNL1,MCM8,BLM,GMPS,GTPBP3,KIF2C,TUBA1C,MSH6,KIF4B,CGNL1,TOP2A,HELLS,GTPBP4,CENPE,KIF24,TUBG1,ABCB1,EFTUD2,CLU,RECQL4,RAD54B,GNL2,DSCC1,KIF23,XRCC2,XRCC3,KIF20B,PRIM1,PRIM2,KIF18B,DHX34,RAD18,ERCC6L,EIF4A3…
GO: Molecular Function	GO:0035639	purine ribonucleoside triphosphate binding		4.077e-16	5.838e-13	6.487e-14	5.089e-13	148	1815	KIF18A,ABCF1,BRIP1,ATAD5,LSG1,MARS,LRRK2,MCM2,MCM3,MCM4,MCM5,MCM6,MCM7,RRM1,ABCA8,CDC7,TUBA1B,MKI67,PIF1,RAD54L,TTF2,DHX37,MYO19,TUBB,MSH2,CAMK1,DDX55,SMC2,ATAD2,DDX27,TRIM23,YARS,RHOB,RUVBL1,UBE2T,CCT5,CHTF18,FLAD1,RHEBL1,TPX2,SMARCA4,POLQ,FIGNL1,PLK4,MCM8,GARS,GART,PBK,SRPK1,BLM,GMPS,AURKA,NEK2,GLUD1,BUB1,BUB1B,UBE2S,NME1,GTPBP3,KIF2C,CAD,GRK6,TUBA1C,UBE2C,PKMYT1,CCT6A,MSH6,TK1,TK2,PEBP1,CHEK2,…
GO: Molecular Function	GO:0008094	DNA-dependent ATPase activity		4.763e-16	6.821e-13	6.821e-14	5.351e-13	27	93	BRIP1,LSG1,MCM4,MCM6,MCM7,PIF1,TTF2,RUVBL1,CHTF18,SMARCA4,POLQ,BLM,TOP2A,RECQL4,RAD54B,DSCC1,XRCC2,XRCC3,RAD18,DDX11,TOP1MT,DNA2,RAD51,RFC2,RFC3,RFC4,RFC5
GO: Biological Process	GO:0007049	cell cycle		3.688e-99	1.96e-95	1.96e-95	1.795e-94	283	1766	NUSAP1,CABLES2,KIF18A,CHAF1B,BRIP1,CENPW,NUP85,HJURP,SPC25,MCM2,MCM3,MCM4,MCM5,MCM6,MCM7,MND1,MCM10,RRM1,RRM2,EZH2,DSN1,LIN9,CDC7,CDC45,FANCA,FANCD2,FANCG,CEP78,NDC80,MKI67,RBM14,TACC3,FHL1,RAD54L,RBM38,FOXM1,CARM1,MYBBP1A,SFPQ,RAE1,DBF4B,GTSE1,DTL,TUBB,BIRC5,PDCD2L,MSH2,CAMK1,STIL,SMC2,SKP1,SKP2,SPAG5,SPC24,RHOB,RUVBL1,CEP72,CGRRF1,CHTF18,CENPI,TPX2,SMARCA4,RACGAP1,UHRF1,GINS2,MTBP,USP39,PRR11,R…
GO: Biological Process	GO:0022402	cell cycle process		3.817e-95	2.028e-91	7.778e-92	7.121e-91	247	1385	NUSAP1,KIF18A,BRIP1,CENPW,NUP85,SPC25,MCM2,MCM3,MCM4,MCM5,MCM6,MCM7,MCM10,RRM2,EZH2,DSN1,CDC7,CDC45,FANCA,FANCD2,FANCG,CEP78,NDC80,MKI67,RBM14,TACC3,FHL1,RAD54L,RBM38,FOXM1,CARM1,MYBBP1A,SFPQ,RAE1,DBF4B,GTSE1,DTL,TUBB,BIRC5,MSH2,STIL,SMC2,SKP1,SKP2,SPAG5,SPC24,RHOB,RUVBL1,CEP72,CGRRF1,CHTF18,CENPI,TPX2,SMARCA4,RACGAP1,GINS2,MTBP,REEP4,CLSPN,CDCA5,GEN1,PLK4,MYBL2,CENPJ,CENPN,MCM8,PBK,CENPK,CCNK,RC…
GO: Biological Process	GO:1903047	mitotic cell cycle process		4.39e-95	2.333e-91	7.778e-92	7.121e-91	205	931	NUSAP1,KIF18A,CENPW,NUP85,SPC25,MCM2,MCM3,MCM4,MCM5,MCM6,MCM7,MCM10,RRM2,EZH2,DSN1,CDC7,CDC45,CEP78,NDC80,FHL1,RBM38,FOXM1,CARM1,RAE1,DBF4B,GTSE1,TUBB,BIRC5,MSH2,STIL,SMC2,SKP1,SKP2,SPAG5,SPC24,RUVBL1,CEP72,TPX2,SMARCA4,RACGAP1,GINS2,MTBP,REEP4,CLSPN,CDCA5,GEN1,PLK4,MYBL2,CENPJ,CENPN,MCM8,PBK,CCNK,RCC2,WDR43,NUP205,BLM,AURKA,NEK2,NCAPG,RRS1,DBF4,BUB1,BUB1B,UBE2S,TIMELESS,CNOT3,PSRC1,KIF2C,TCF3,TC…
GO: Biological Process	GO:0000278	mitotic cell cycle		8.262e-94	4.391e-90	1.098e-90	1.005e-89	212	1016	NUSAP1,KIF18A,CENPW,NUP85,SPC25,MCM2,MCM3,MCM4,MCM5,MCM6,MCM7,MCM10,RRM1,RRM2,EZH2,DSN1,CDC7,CDC45,CEP78,NDC80,FHL1,RBM38,FOXM1,CARM1,RAE1,DBF4B,GTSE1,TUBB,BIRC5,MSH2,STIL,SMC2,SKP1,SKP2,SPAG5,SPC24,RUVBL1,CEP72,TPX2,SMARCA4,RACGAP1,GINS2,MTBP,REEP4,CLSPN,CDCA5,GEN1,PLK4,MYBL2,CENPJ,CENPN,MCM8,PBK,CCNK,RCC2,WDR43,NUP205,BLM,AURKA,NEK2,NCAPG,BRCA2,RRS1,DBF4,BUB1,BUB1B,UBE2S,TIMELESS,CNOT3,PSRC1,KI…
GO: Biological Process	GO:0051276	chromosome organization		8.267e-70	4.394e-66	8.787e-67	8.045e-66	199	1189	NUSAP1,KIF18A,CHAF1B,BRIP1,CENPW,NUP85,FBL,HJURP,SPC25,MCM2,MCM3,MCM4,MCM5,MCM6,MCM7,ACTL6A,EZH2,DSN1,CDC45,FANCD2,HIST1H2AJ,HIST1H2AL,HIST1H2BH,HIST1H2BO,WDR75,HIST1H3G,NDC80,HIST1H3B,FEN1,RBM14,SETD3,PIF1,RAD54L,CARM1,SFPQ,RAE1,BEND3,GINS4,BIRC5,MSH2,CAMK1,STIL,SMC2,ATAD2,SKP1,SPAG5,DNAJC2,SPC24,RUVBL1,CCT5,ASF1B,ZNF335,CENPI,SMARCA4,RACGAP1,UHRF1,SMARCD1,GINS2,MTBP,DOT1L,CDCA5,GEN1,KDM1A,CENPN…
GO: Biological Process	GO:0000280	nuclear division		7.226e-58	3.841e-54	6.401e-55	5.861e-54	130	599	NUSAP1,KIF18A,CENPW,SPC25,DSN1,FANCA,FANCD2,NDC80,MKI67,RAD54L,BIRC5,MSH2,STIL,SMC2,SPAG5,SPC24,RUVBL1,CHTF18,TPX2,SMARCA4,RACGAP1,MTBP,REEP4,CDCA5,GEN1,MYBL2,CENPN,PBK,CCNK,RCC2,AURKA,NEK2,NCAPG,BRCA2,RRS1,BUB1,BUB1B,UBE2S,TIMELESS,PSRC1,KIF2C,UBE2C,HAUS5,TOPBP1,PRC1,NCAPH,CCNA2,ZWINT,CCNB1,PKMYT1,CCNF,MSH6,CCNB2,PEBP1,CHEK2,MASTL,KIF4B,CDK1,CDC6,CDC20,CDC25A,CDC25B,CDC25C,SKA1,TOP2A,CDK2,AURKB,…
GO: Biological Process	GO:0048285	organelle fission		3.349e-57	1.78e-53	2.543e-54	2.328e-53	133	636	NUSAP1,KIF18A,CENPW,LRRK2,SPC25,DSN1,FANCA,FANCD2,NDC80,MKI67,RAD54L,BIRC5,MSH2,STIL,SMC2,SPAG5,SPC24,RUVBL1,CHTF18,TPX2,SMARCA4,RACGAP1,MTBP,REEP4,CDCA5,GEN1,MYBL2,CENPN,PBK,CCNK,RCC2,AURKA,NEK2,NCAPG,BRCA2,RRS1,BUB1,BUB1B,UBE2S,TIMELESS,PSRC1,KIF2C,UBE2C,HAUS5,TOPBP1,PRC1,NCAPH,CCNA2,ZWINT,CCNB1,PKMYT1,CCNF,MSH6,CCNB2,PEBP1,CHEK2,MASTL,KIF4B,PRKN,CDK1,CDC6,CDC20,CDC25A,CDC25B,CDC25C,SKA1,TOP2A,…
GO: Biological Process	GO:0007059	chromosome segregation		2.636e-53	1.401e-49	1.751e-50	1.603e-49	95	333	NUSAP1,KIF18A,CENPW,NUP85,HJURP,SPC25,DSN1,FANCD2,NDC80,SFPQ,BIRC5,STIL,SMC2,SPAG5,SPC24,CHTF18,CENPI,RACGAP1,MTBP,CDCA5,GEN1,CENPN,SRPK1,CENPK,RCC2,NEK2,NCAPG,BRCA1,BRCA2,RRS1,BUB1,BUB1B,PSRC1,KIF2C,UBE2C,PRC1,NCAPH,ZWINT,CCNB1,KIF4B,CDC6,CDC20,SKA1,TOP2A,AURKB,PTTG1,CENPA,CENPE,CENPF,RCC1,TRIP13,TTK,UBE2I,CENPM,NUP37,RECQL4,DSCC1,PLK1,KIF23,CENPO,XPO1,XRCC3,CENPH,KIF18B,ESPL1,KNTC1,RAD18,INCENP…
GO: Biological Process	GO:0051301	cell division		4.644e-52	2.468e-48	2.742e-49	2.511e-48	130	668	NUSAP1,CABLES2,CENPW,SPC25,DSN1,CDC7,TUBA1B,NDC80,TUBB,BIRC5,MSH2,STIL,SMC2,SPAG5,SPC24,RHOB,RUVBL1,TPX2,RACGAP1,MTBP,USP39,REEP4,CDCA5,GEN1,CENPJ,CCNK,RCC2,BLM,AURKA,NEK2,NCAPG,BRCA2,BUB1,BUB1B,UBE2S,TIMELESS,PSRC1,KIF2C,YBX1,TUBA1C,UBE2C,HAUS5,PRC1,NCAPH,CCNA2,ZWINT,CCNB1,PKMYT1,CCNE1,CCNF,CCNB2,PEBP1,CCNE2,CHEK2,MASTL,KIF4B,CDK1,CDC6,CDC20,CDC25A,CDC25B,CDC25C,SKA1,TOP2A,CDK2,AURKB,HELLS,PTTG1…
GO: Biological Process	GO:0006259	DNA metabolic process		1.863e-51	9.903e-48	9.903e-49	9.066e-48	158	992	CHAF1B,BRIP1,MCM2,MCM3,MCM4,MCM5,MCM6,MCM7,ACTL6A,MND1,MCM10,RRM1,RRM2,EZH2,LIN9,CDC7,CDC45,FANCA,FANCD2,FANCE,FANCB,FANCG,FEN1,MKI67,RBM14,PIF1,RAD54L,FOXM1,MYBBP1A,SFPQ,RNASEH2A,DBF4B,DTL,BEND3,GINS4,MSH2,DNAJC2,RAD51AP1,RUVBL1,UBE2T,CCT5,NUDT1,CHTF18,SMARCA4,UHRF1,GINS2,CLSPN,TDP1,RNASEH1,POLQ,CDCA5,FIGNL1,GEN1,KDM1A,MCM8,NASP,SRPK1,SSRP1,BLM,NEK2,BRCA1,BRCA2,APEX2,DBF4,TIMELESS,NME1,TCF3,TOPB…
GO: Cellular Component	GO:0005694	chromosome		2.584e-78	1.83e-75	1.83e-75	1.306e-74	186	941	NUSAP1,KIF18A,CHAF1B,CENPW,NUP85,FBL,HJURP,SPC25,MCM2,MCM3,MCM4,MCM5,MCM6,MCM7,ACTL6A,MCM10,EZH2,DSN1,CDC45,FANCD2,HIST1H2AJ,HIST1H2AL,HIST1H2BH,HIST1H2BO,HIST1H3G,NDC80,HIST1H3B,FEN1,MKI67,SETD3,PIF1,SFPQ,DBF4B,CALCOCO1,DTL,BEND3,GINS4,BIRC5,MSH2,SMC2,THOC3,SPAG5,SPC24,RUVBL1,ASF1B,CHTF18,CENPI,PUS1,SMARCA4,UHRF1,GINS2,MTBP,CLSPN,POLQ,CDCA5,FIGNL1,PLK4,KDM1A,MYBL2,CENPN,RRP1B,NASP,SSRP1,CD3EAP,C…
GO: Cellular Component	GO:0044427	chromosomal part		1.514e-68	1.072e-65	5.36e-66	3.827e-65	165	839	KIF18A,CHAF1B,CENPW,NUP85,HJURP,SPC25,MCM2,MCM3,MCM4,MCM5,MCM6,MCM7,ACTL6A,MCM10,EZH2,DSN1,CDC45,HIST1H2AJ,HIST1H2AL,HIST1H2BH,HIST1H2BO,HIST1H3G,NDC80,HIST1H3B,FEN1,MKI67,SETD3,PIF1,SFPQ,DBF4B,CALCOCO1,BEND3,GINS4,BIRC5,MSH2,SMC2,THOC3,SPAG5,SPC24,RUVBL1,ASF1B,CHTF18,CENPI,PUS1,SMARCA4,UHRF1,GINS2,MTBP,CDCA5,KDM1A,MYBL2,CENPN,RRP1B,NASP,CENPK,RCC2,WDR43,BLM,AURKA,NEK2,NCAPG,BRCA2,SUV39H1,BUB1,BU…
GO: Cellular Component	GO:0098687	chromosomal region		1.549e-49	1.097e-46	3.655e-47	2.61e-46	92	344	KIF18A,CENPW,NUP85,HJURP,SPC25,MCM2,MCM3,MCM4,MCM5,MCM6,MCM7,DSN1,HIST1H3G,NDC80,HIST1H3B,FEN1,MKI67,PIF1,BIRC5,MSH2,THOC3,SPAG5,SPC24,CENPI,MTBP,CDCA5,KDM1A,CENPN,CENPK,RCC2,WDR43,BLM,AURKA,NEK2,BRCA2,SUV39H1,BUB1,BUB1B,KIF2C,HIST1H3F,TERT,ZWINT,CCNB1,WDHD1,CHEK2,H2AFX,CDK1,SKA1,PCNA,CDK2,AURKB,HELLS,CENPA,CENPE,CENPF,OIP5,CHEK1,CENPM,NUP37,DSCC1,PLK1,POLD1,CENPO,DCLRE1B,XPO1,XRCC3,CENPH,PRKDC,K…
GO: Cellular Component	GO:0000775	chromosome, centromeric region		5.924e-40	4.194e-37	1.048e-37	7.487e-37	62	185	KIF18A,CENPW,NUP85,HJURP,SPC25,DSN1,NDC80,MKI67,BIRC5,SPAG5,SPC24,CENPI,MTBP,CDCA5,CENPN,CENPK,RCC2,WDR43,AURKA,NEK2,SUV39H1,BUB1,BUB1B,KIF2C,ZWINT,CCNB1,WDHD1,SKA1,AURKB,HELLS,CENPA,CENPE,CENPF,OIP5,CENPM,NUP37,DSCC1,PLK1,CENPO,XPO1,CENPH,KNTC1,INCENP,NDE1,ERCC6L,CENPL,ZNF207,DAXX,NUF2,NCAPD2,DNMT1,KIF22,DNMT3A,DNMT3B,ZWILCH,RANGAP1,NUP107,CDCA8,SUV39H2,ESCO2,SKA3,MAD2L1
GO: Cellular Component	GO:0000228	nuclear chromosome		1.049e-38	7.425e-36	1.485e-36	1.06e-35	103	569	CHAF1B,MCM2,MCM3,MCM4,MCM5,MCM6,MCM7,ACTL6A,MCM10,EZH2,CDC45,HIST1H2AJ,HIST1H2AL,HIST1H2BH,HIST1H2BO,HIST1H3G,NDC80,HIST1H3B,FEN1,SETD3,PIF1,DBF4B,CALCOCO1,BEND3,GINS4,BIRC5,MSH2,SMC2,THOC3,RUVBL1,ASF1B,PUS1,SMARCA4,UHRF1,GINS2,CDCA5,FIGNL1,KDM1A,NASP,BLM,AURKA,NEK2,BRCA1,BRCA2,RRS1,SUV39H1,BUB1,BUB1B,TIMELESS,HIST1H3F,TCF3,TOPBP1,TERT,CCNB1,MSH6,HIST1H1B,CBX7,H2AFX,H2AFZ,CDK1,TOP2A,PCNA,HDAC2,AU…
GO: Cellular Component	GO:0000793	condensed chromosome		1.498e-36	1.061e-33	1.768e-34	1.262e-33	62	208	CENPW,NUP85,HJURP,SPC25,DSN1,FANCD2,NDC80,MKI67,BIRC5,SMC2,SPAG5,SPC24,CDCA5,CENPN,CENPK,BLM,AURKA,NEK2,NCAPG,BRCA1,RRS1,SUV39H1,BUB1,BUB1B,KIF2C,TOPBP1,NCAPH,ZWINT,CCNB1,H2AFX,SKA1,TOP2A,CDK2,AURKB,CENPA,CENPE,CENPF,HMGB2,RCC1,CHEK1,TUBG1,UBE2I,CENPM,NUP37,PLK1,CENPO,CENPH,KNTC1,INCENP,NDE1,ERCC6L,NOL6,ZNF207,NUF2,NCAPD2,RAD51,ZWILCH,RANGAP1,NUP107,SMC4,SKA3,MAD2L1
GO: Cellular Component	GO:0005730	nucleolus		6.34e-34	4.489e-31	6.413e-32	4.579e-31	123	891	BRIX1,NUSAP1,CENPW,FBL,MARS,TRAIP,HJURP,ETV4,NOL10,MCM10,DNAJB9,FANCD2,FANCG,WDR75,NIP7,FEN1,MKI67,RBM14,MYBBP1A,NOP56,RAE1,NOP16,DHX37,DTL,BEND3,LYAR,SMC2,SKP2,DDX27,RRP1,SPC24,NSUN5,NOP58,CCT5,PUS1,SMARCA4,PDCD11,SNRPA,PLK4,TGS1,RRP1B,RPP40,UTP14A,HNRNPM,RDM1,SSRP1,CD3EAP,RCC2,WDR43,BLM,NEK2,APEX2,RRS1,BTD,RRP12,POP1,BYSL,KDM2B,BOP1,TIMELESS,TAF5,NOP2,TCOF1,TERT,EXOSC2,PHF5A,AKTIP,SF3B3,PA2G4,N…
GO: Cellular Component	GO:0044454	nuclear chromosome part		2.897e-32	2.051e-29	2.564e-30	1.831e-29	91	531	CHAF1B,MCM2,MCM3,MCM4,MCM5,MCM6,MCM7,ACTL6A,MCM10,EZH2,CDC45,HIST1H2AJ,HIST1H2AL,HIST1H2BH,HIST1H2BO,HIST1H3G,NDC80,HIST1H3B,FEN1,SETD3,PIF1,DBF4B,CALCOCO1,BEND3,GINS4,MSH2,THOC3,RUVBL1,ASF1B,PUS1,SMARCA4,UHRF1,GINS2,CDCA5,KDM1A,NASP,BLM,AURKA,BRCA2,SUV39H1,BUB1,BUB1B,TIMELESS,HIST1H3F,TCF3,TERT,CCNB1,MSH6,HIST1H1B,CBX7,H2AFX,H2AFZ,CDK1,PCNA,HDAC2,AURKB,MTA2,CENPA,CENPE,HMGB2,RCC1,POLA2,UBE2I,PLK…
GO: Cellular Component	GO:0000776	kinetochore		7.472e-30	5.29e-27	5.878e-28	4.197e-27	44	124	KIF18A,CENPW,NUP85,HJURP,SPC25,DSN1,NDC80,BIRC5,SPAG5,SPC24,CENPI,MTBP,CENPN,CENPK,WDR43,NEK2,BUB1,BUB1B,KIF2C,ZWINT,CCNB1,SKA1,AURKB,CENPA,CENPE,CENPF,CENPM,NUP37,PLK1,CENPO,XPO1,CENPH,KNTC1,INCENP,NDE1,ERCC6L,ZNF207,NUF2,KIF22,ZWILCH,RANGAP1,NUP107,SKA3,MAD2L1
GO: Cellular Component	GO:0000779	condensed chromosome, centromeric region		1.205e-28	8.533e-26	8.533e-27	6.093e-26	40	105	CENPW,NUP85,HJURP,SPC25,DSN1,NDC80,BIRC5,SPAG5,SPC24,CENPN,CENPK,AURKA,NEK2,BUB1,BUB1B,KIF2C,ZWINT,CCNB1,SKA1,AURKB,CENPA,CENPE,CENPF,CENPM,NUP37,PLK1,CENPO,CENPH,KNTC1,INCENP,NDE1,ERCC6L,ZNF207,NUF2,NCAPD2,ZWILCH,RANGAP1,NUP107,SKA3,MAD2L1
Human Phenotype	HP:0000340	Sloping forehead		1.552e-16	3.668e-13	3.668e-13	3.061e-12	29	108	BRIP1,FANCA,FANCD2,FANCE,FANCB,FANCG,STIL,UBE2T,ZNF335,PLK4,CENPJ,BRCA2,BUB1,BUB1B,SLC25A19,CENPE,TRIP13,ASPM,XRCC2,NDE1,NSUN2,DDX11,KIF14,WDR62,KIF11,RAD51,PALB2,FANCI,SASS6
Human Phenotype	HP:0006872	Cerebral hypoplasia		2.213e-15	5.229e-12	2.615e-12	2.182e-11	16	29	BRIP1,FANCA,FANCD2,FANCE,FANCB,FANCG,UBE2T,BRCA2,BUB1,BUB1B,TRIP13,XRCC2,KIF14,RAD51,PALB2,FANCI
Human Phenotype	HP:0000252	Microcephaly		4.153e-15	9.814e-12	3.271e-12	2.73e-11	77	766	SF3B4,BRIP1,ACADSB,TRAIP,MCM4,CDC45,FANCA,FANCD2,FANCE,FANCB,FANCG,ALDH6A1,MOCS2,RNASEH2A,NACC1,TUBB,STIL,UBE2T,ZNF335,PUS1,SMARCA4,SNRPB,PLK4,CENPJ,AUH,BLM,BRCA1,BRCA2,BUB1,BUB1B,GRIN2D,TERT,CKAP2L,CDC6,SLC25A19,HCFC1,PCNA,CENPE,PEX12,HMGB3,TRIP13,TUBG1,EFTUD2,CLN5,RECQL4,PITX1,ASPM,PSMC3IP,DONSON,POC1A,TAPT1,TSEN54,XRCC2,PRKDC,ZBTB16,NDE1,NSUN2,DDX11,PYCR1,DKC1,KIF14,CDT1,DNA2,WDR62,KIF11,RAD51…
Human Phenotype	HP:0009778	Short thumb		2.25e-13	5.318e-10	1.329e-10	1.109e-09	19	55	BRIP1,FANCA,FANCD2,FANCE,FANCB,FANCG,UBE2T,KDM1A,BRCA1,BRCA2,LMNB2,RECQL4,XRCC2,EIF4A3,RAD51,SALL4,PALB2,ESCO2,FANCI
Human Phenotype	HP:0005522	Pyridoxine-responsive sideroblastic anemia		2.072e-12	4.896e-09	6.35e-10	5.299e-09	12	20	BRIP1,FANCA,FANCD2,FANCE,FANCB,FANCG,UBE2T,BRCA2,XRCC2,RAD51,PALB2,FANCI
Human Phenotype	HP:0006265	Aplasia/Hypoplasia of fingers		2.072e-12	4.896e-09	6.35e-10	5.299e-09	12	20	BRIP1,FANCA,FANCD2,FANCE,FANCB,FANCG,UBE2T,BRCA2,XRCC2,RAD51,PALB2,FANCI
Human Phenotype	HP:0010293	Aplasia/Hypoplasia of the uvula		2.072e-12	4.896e-09	6.35e-10	5.299e-09	12	20	BRIP1,FANCA,FANCD2,FANCE,FANCB,FANCG,UBE2T,BRCA2,XRCC2,RAD51,PALB2,FANCI
Human Phenotype	HP:0006501	Aplasia/Hypoplasia of the radius		2.15e-12	5.08e-09	6.35e-10	5.299e-09	16	41	SF3B4,BRIP1,FANCA,FANCD2,FANCE,FANCB,FANCG,UBE2T,BRCA2,RECQL4,PITX1,XRCC2,ZBTB16,RAD51,PALB2,FANCI
Human Phenotype	HP:0003254	Abnormality of DNA repair		2.77e-12	6.546e-09	6.895e-10	5.754e-09	14	30	BRIP1,FANCA,FANCD2,FANCE,FANCB,FANCG,UBE2T,BLM,BRCA2,RECQL4,XRCC2,RAD51,PALB2,FANCI
Human Phenotype	HP:0100867	Duodenal stenosis		2.918e-12	6.895e-09	6.895e-10	5.754e-09	13	25	BRIP1,CDC45,FANCA,FANCD2,FANCE,FANCB,FANCG,UBE2T,BRCA2,XRCC2,RAD51,PALB2,FANCI
Mouse Phenotype	MP:0013292	embryonic lethality prior to organogenesis		3.466e-27	1.374e-23	1.374e-23	1.218e-22	102	721	NUSAP1,FBL,TRAIP,MCM4,MCM10,RRM1,HDHD2,RRM2,EZH2,LIN9,CDC7,CDC45,FEN1,RAE1,DTL,GINS4,BIRC5,YARS,SRRT,RUVBL1,PSMG1,C1orf112,ZNF335,SMARCA4,RACGAP1,MTBP,EIF3B,CPSF3,LMBRD1,PLK4,KDM1A,MYBL2,TGS1,CENPJ,PPRC1,GART,NASP,SSRP1,CCNK,AURKA,BRCA1,BRCA2,BUB1,BUB1B,EIF2S2,BYSL,DNAJC9,TIMELESS,CNOT3,TOPBP1,ODF2,PHF5A,CCNA2,CCNB1,H2AFZ,CDK1,CDC20,CDC25A,HCFC1,PCNA,PTTG1,CENPA,CENPE,CFL1,NUP62,CHEK1,PFN1,TUBG1,…
Mouse Phenotype	MP:0013293	embryonic lethality prior to tooth bud stage		1.202e-26	4.764e-23	2.382e-23	2.111e-22	107	797	NUSAP1,FBL,TRAIP,MCM4,MCM10,RRM1,HDHD2,RRM2,EZH2,LIN9,CDC7,CDC45,FEN1,RAE1,DTL,GINS4,BIRC5,YARS,SRRT,RUVBL1,PSMG1,C1orf112,ZNF335,SMARCA4,RACGAP1,MTBP,EIF3B,CDCA5,CPSF3,LMBRD1,PLK4,KDM1A,MYBL2,TGS1,CENPJ,PPRC1,GART,NASP,SSRP1,CCNK,AURKA,BRCA1,BRCA2,BUB1,BUB1B,EIF2S2,BYSL,DNAJC9,TIMELESS,CNOT3,TOPBP1,ODF2,PHF5A,CCNA2,CCNB1,H2AFZ,CDK1,CDC20,CDC25A,HCFC1,PCNA,PTTG1,CENPA,CENPE,CFL1,NUP62,CHEK1,PFN1,…
Mouse Phenotype	MP:0008762	embryonic lethality		4.236e-25	1.679e-21	5.597e-22	4.961e-21	168	1766	NUSAP1,KIF18A,FBL,TRAIP,MCM4,MCM5,ACTL6A,MCM10,RRM1,HDHD2,RRM2,EZH2,LIN9,CDC7,CDC45,FANCD2,FZD4,NIP7,FEN1,TACC3,MYBBP1A,RAE1,TRA2B,DTL,GINS4,BIRC5,STIL,SMC2,YARS,SRRT,RUVBL1,PSMG1,C1orf112,RHEBL1,ZNF335,TPX2,SMARCA4,RACGAP1,UHRF1,MTBP,EIF3B,DOT1L,RNASEH1,CDCA5,CPSF3,LMBRD1,PLK4,KDM1A,MYBL2,TGS1,CENPJ,PPRC1,GART,BBS1,NASP,NDUFA5,SSRP1,CCNK,BLM,AURKA,BRCA1,BRCA2,BUB1,BUB1B,EIF2S2,BYSL,DNAJC9,TIMELE…
Mouse Phenotype	MP:0003077	abnormal cell cycle		1.103e-24	4.371e-21	1.093e-21	9.684e-21	63	316	NUSAP1,KIF18A,MCM2,MCM3,MCM4,LIN9,CDC7,TACC3,FOXM1,RAE1,BIRC5,MSH2,SMC2,TPX2,PLK4,KDM1A,MYBL2,TGS1,CENPJ,BLM,AURKA,BRCA1,BRCA2,BUB1,BUB1B,TOPBP1,NCAPH,CCNA2,CCNF,CHEK2,MASTL,CBX7,TMPO,CDK1,CDC20,CDC25A,CDK2,TP73,HDAC2,AURKB,PTTG1,CENPA,CENPE,CHEK1,TUBG1,ASPM,PLK1,KIF20B,ESPL1,NOC2L,DDX11,FBXO5,DIAPH3,DNA2,WDR62,E2F1,E2F3,E2F4,CDCA8,ESCO2,TRIM28,PSME3,MAD2L1
Mouse Phenotype	MP:0003111	abnormal cell nucleus morphology		8.33e-24	3.302e-20	6.604e-21	5.853e-20	47	180	BRIP1,ATAD5,MCM2,MCM4,LIN9,FANCA,FEN1,PIF1,RAD54L,BIRC5,SMC2,TPX2,DOT1L,MCM8,AURKA,BRCA1,BRCA2,BUB1,BUB1B,SYNE1,NCAPH,TERT,CHEK2,CDK1,CDC20,CDC25A,TP73,HDAC2,AURKB,HELLS,PTTG1,CENPA,CHEK1,TTK,PLK1,ESPL1,DAXX,DDX11,DKC1,DNA2,KIF22,CHAF1A,E2F1,CDCA8,ESCO2,LMNB1,MAD2L1
Mouse Phenotype	MP:0008866	chromosomal instability		1.767e-19	7.004e-16	1.167e-16	1.035e-15	34	114	BRIP1,ATAD5,MCM2,MCM3,MCM4,MCM6,MCM7,FANCA,FANCD2,FANCG,FEN1,POLQ,CENPJ,MCM8,BLM,AURKA,BRCA1,BRCA2,BUB1,BUB1B,TERT,CCNE1,CHEK2,EXO1,H2AFX,HDAC2,CENPE,RECQL4,XRCC2,RAD18,DNA2,PALB2,LIG1,MAD2L1
Mouse Phenotype	MP:0010094	abnormal chromosome stability		3.268e-19	1.295e-15	1.851e-16	1.64e-15	34	116	BRIP1,ATAD5,MCM2,MCM3,MCM4,MCM6,MCM7,FANCA,FANCD2,FANCG,FEN1,POLQ,CENPJ,MCM8,BLM,AURKA,BRCA1,BRCA2,BUB1,BUB1B,TERT,CCNE1,CHEK2,EXO1,H2AFX,HDAC2,CENPE,RECQL4,XRCC2,RAD18,DNA2,PALB2,LIG1,MAD2L1
Mouse Phenotype	MP:0004023	abnormal chromosome number		1.121e-17	4.444e-14	5.555e-15	4.923e-14	28	84	ATAD5,FEN1,TPX2,DOT1L,MCM8,AURKA,BRCA1,BRCA2,BUB1,BUB1B,TERT,CHEK2,CDK1,CDC20,CDC25A,TP73,HDAC2,AURKB,HELLS,CENPA,CHEK1,TTK,PLK1,ESPL1,DDX11,DNA2,E2F1,MAD2L1
Mouse Phenotype	MP:0006204	embryonic lethality before implantation		9.661e-17	3.829e-13	4.255e-14	3.771e-13	38	172	FBL,MCM10,RRM1,FEN1,DTL,BIRC5,RUVBL1,ZNF335,SMARCA4,RACGAP1,EIF3B,NASP,CCNK,AURKA,TOPBP1,ODF2,CDK1,CDC20,PCNA,PTTG1,CFL1,CHEK1,PFN1,TUBG1,HNRNPL,PLCB3,PLK1,FBXO5,KIF11,DNMT1,KIF22,RAD51,CHAF1A,SALL4,ECT2,CDCA8,ESCO2,LIFR
Mouse Phenotype	MP:0004046	abnormal mitosis		1.737e-16	6.885e-13	6.885e-14	6.102e-13	35	148	NUSAP1,KIF18A,LIN9,TACC3,BIRC5,SMC2,TPX2,PLK4,CENPJ,BLM,AURKA,BRCA1,BRCA2,BUB1,BUB1B,NCAPH,MASTL,CDK1,CDC20,CDC25A,HDAC2,AURKB,PTTG1,CENPA,CENPE,TUBG1,PLK1,KIF20B,ESPL1,FBXO5,DNA2,WDR62,CDCA8,ESCO2,MAD2L1
Domain	IPR027417	P-loop_NTPase	InterPro	9.469e-16	3.124e-12	3.124e-12	2.711e-11	88	849	KIF18A,ABCF1,BRIP1,ATAD5,LSG1,LRRK2,MCM2,MCM3,MCM4,MCM5,MCM6,MCM7,ABCA8,PIF1,RAD54L,TTF2,DHX37,MYO19,MSH2,DDX55,SMC2,ATAD2,DDX27,TRIM23,SBNO2,RHOB,RUVBL1,CHTF18,RHEBL1,SMARCA4,POLQ,FIGNL1,MCM8,BLM,GTPBP3,KIF2C,HNRNPUL1,MSH6,TK1,TK2,KIF4B,CDC6,HELLS,GTPBP4,CENPE,TRIP13,KIF24,ABCB1,EFTUD2,RECQL4,RAD54B,ASPM,GNL2,UCK2,KIF23,MTHFD1L,XRCC2,XRCC3,KIF20B,CTPS1,KIF18B,DHX34,ERCC6L,EIF4A3,KIF4A,DDX11,KIF1…
Domain	3.40.50.300	-	Gene3D	4.123e-11	1.36e-07	4.047e-08	3.513e-07	71	747	ABCF1,BRIP1,ATAD5,LSG1,LRRK2,MCM2,MCM3,MCM4,MCM5,MCM6,MCM7,ABCA8,PIF1,RAD54L,TTF2,DHX37,MYO19,MSH2,DDX55,SMC2,ATAD2,DDX27,TRIM23,SBNO2,RHOB,RUVBL1,CHTF18,RHEBL1,SMARCA4,POLQ,FIGNL1,MCM8,BLM,GTPBP3,HNRNPUL1,MSH6,TK2,CDC6,HELLS,GTPBP4,TRIP13,ABCB1,EFTUD2,RECQL4,RAD54B,GNL2,UCK2,MTHFD1L,XRCC2,XRCC3,CTPS1,DHX34,ERCC6L,EIF4A3,DDX11,DQX1,DLG2,DNA2,ABCC10,RAD51,RAN,DTYMK,SMC4,RFC2,RFC3,RFC4,RFC5,ATAD3B,…
Domain	IPR027640	Kinesin-like_fam	InterPro	7.563e-11	2.495e-07	4.047e-08	3.513e-07	15	43	KIF18A,KIF2C,KIF4B,CENPE,KIF24,KIF23,KIF20B,KIF18B,KIF4A,KIF15,KIF14,KIF11,KIFC1,KIF22,KIF20A
Domain	SM00129	KISc	SMART	1.104e-10	3.643e-07	4.047e-08	3.513e-07	15	44	KIF18A,KIF2C,KIF4B,CENPE,KIF24,KIF23,KIF20B,KIF18B,KIF4A,KIF15,KIF14,KIF11,KIFC1,KIF22,KIF20A
Domain	PS50067	KINESIN_MOTOR_2	PROSITE	1.104e-10	3.643e-07	4.047e-08	3.513e-07	15	44	KIF18A,KIF2C,KIF4B,CENPE,KIF24,KIF23,KIF20B,KIF18B,KIF4A,KIF15,KIF14,KIF11,KIFC1,KIF22,KIF20A
Domain	PS00411	KINESIN_MOTOR_1	PROSITE	1.104e-10	3.643e-07	4.047e-08	3.513e-07	15	44	KIF18A,KIF2C,KIF4B,CENPE,KIF24,KIF23,KIF20B,KIF18B,KIF4A,KIF15,KIF14,KIF11,KIFC1,KIF22,KIF20A
Domain	3.40.850.10	-	Gene3D	1.104e-10	3.643e-07	4.047e-08	3.513e-07	15	44	KIF18A,KIF2C,KIF4B,CENPE,KIF24,KIF23,KIF20B,KIF18B,KIF4A,KIF15,KIF14,KIF11,KIFC1,KIF22,KIF20A
Domain	PF00225	Kinesin	Pfam	1.104e-10	3.643e-07	4.047e-08	3.513e-07	15	44	KIF18A,KIF2C,KIF4B,CENPE,KIF24,KIF23,KIF20B,KIF18B,KIF4A,KIF15,KIF14,KIF11,KIFC1,KIF22,KIF20A
Domain	IPR001752	Kinesin_motor_dom	InterPro	1.104e-10	3.643e-07	4.047e-08	3.513e-07	15	44	KIF18A,KIF2C,KIF4B,CENPE,KIF24,KIF23,KIF20B,KIF18B,KIF4A,KIF15,KIF14,KIF11,KIFC1,KIF22,KIF20A
Domain	IPR019821	Kinesin_motor_CS	InterPro	4.531e-10	1.495e-06	1.495e-07	1.297e-06	14	41	KIF18A,KIF2C,KIF4B,CENPE,KIF24,KIF23,KIF20B,KIF18B,KIF4A,KIF14,KIF11,KIFC1,KIF22,KIF20A
Pathway	1269741	Cell Cycle	BioSystems: REACTOME	1.355e-86	2.289e-83	2.289e-83	1.833e-82	166	624	KIF18A,BRIP1,CENPW,NUP85,HJURP,SPC25,MCM2,MCM3,MCM4,MCM5,MCM6,MCM7,MND1,MCM10,RRM2,DSN1,LIN9,CDC7,CDC45,HIST1H2AJ,HIST1H2BH,HIST1H2BO,CEP78,HIST1H3G,NDC80,HIST1H3B,FEN1,FOXM1,RAE1,GTSE1,TUBB,GINS4,BIRC5,SMC2,SKP1,SKP2,SPC24,RUVBL1,CEP72,CENPI,TPX2,GINS2,CLSPN,CDCA5,PLK4,MYBL2,CENPJ,CENPN,MCM8,CENPK,RCC2,NUP205,BLM,AURKA,NEK2,NCAPG,BRCA1,BRCA2,DBF4,BUB1,BUB1B,KIF2C,HIST1H3F,SYNE1,UBE2C,HAUS5,TOPBP…
Pathway	1269763	Cell Cycle, Mitotic	BioSystems: REACTOME	2.96e-79	4.999e-76	2.499e-76	2.002e-75	146	517	KIF18A,NUP85,SPC25,MCM2,MCM3,MCM4,MCM5,MCM6,MCM7,MCM10,RRM2,DSN1,LIN9,CDC7,CDC45,HIST1H2AJ,HIST1H2BH,HIST1H2BO,CEP78,HIST1H3G,NDC80,HIST1H3B,FEN1,FOXM1,RAE1,GTSE1,TUBB,GINS4,BIRC5,SMC2,SKP1,SKP2,SPC24,CEP72,CENPI,TPX2,GINS2,CDCA5,PLK4,MYBL2,CENPJ,CENPN,MCM8,CENPK,RCC2,NUP205,AURKA,NEK2,NCAPG,DBF4,BUB1,BUB1B,KIF2C,HIST1H3F,UBE2C,HAUS5,ODF2,NCAPH,TFDP1,CCNA2,ZWINT,CCNB1,PKMYT1,CCNE1,TK2,CCNB2,CCNE2…
Pathway	1269810	M Phase	BioSystems: REACTOME	1.346e-34	2.274e-31	7.579e-32	6.07e-31	75	311	KIF18A,NUP85,SPC25,DSN1,HIST1H2AJ,HIST1H2BH,HIST1H2BO,HIST1H3G,NDC80,HIST1H3B,RAE1,BIRC5,SMC2,SPC24,CENPI,CDCA5,CENPN,CENPK,RCC2,NUP205,NCAPG,BUB1,BUB1B,KIF2C,HIST1H3F,UBE2C,NCAPH,ZWINT,CCNB1,CCNB2,MASTL,H2AFX,H2AFZ,TMPO,CDK1,NUP188,CDC20,SKA1,AURKB,PTTG1,CENPA,CENPE,CENPF,NUP62,CENPM,NUP37,PLK1,VRK1,KIF23,CENPO,XPO1,NUP155,CENPH,NUP93,ESPL1,KNTC1,INCENP,NDE1,ERCC6L,CENPL,PSMB2,NUF2,PSMD11,NCAPG2…
Pathway	1269820	Mitotic Prometaphase	BioSystems: REACTOME	3.031e-34	5.12e-31	1.28e-31	1.025e-30	47	111	KIF18A,NUP85,SPC25,DSN1,NDC80,BIRC5,SMC2,SPC24,CENPI,CDCA5,CENPN,CENPK,RCC2,NCAPG,BUB1,BUB1B,KIF2C,NCAPH,ZWINT,CCNB1,CCNB2,CDK1,CDC20,SKA1,AURKB,CENPA,CENPE,CENPF,CENPM,NUP37,PLK1,CENPO,XPO1,CENPH,KNTC1,INCENP,NDE1,ERCC6L,CENPL,NUF2,NCAPD2,ZWILCH,RANGAP1,NUP107,SMC4,CDCA8,MAD2L1
Pathway	1269821	Resolution of Sister Chromatid Cohesion	BioSystems: REACTOME	6.941e-30	1.172e-26	2.345e-27	1.878e-26	42	103	KIF18A,NUP85,SPC25,DSN1,NDC80,BIRC5,SPC24,CENPI,CDCA5,CENPN,CENPK,RCC2,BUB1,BUB1B,KIF2C,ZWINT,CCNB1,CCNB2,CDK1,CDC20,SKA1,AURKB,CENPA,CENPE,CENPF,CENPM,NUP37,PLK1,CENPO,XPO1,CENPH,KNTC1,INCENP,NDE1,ERCC6L,CENPL,NUF2,ZWILCH,RANGAP1,NUP107,CDCA8,MAD2L1
Pathway	1269784	DNA strand elongation	BioSystems: REACTOME	3.295e-28	5.566e-25	9.277e-26	7.43e-25	25	32	MCM2,MCM3,MCM4,MCM5,MCM6,MCM7,CDC45,FEN1,GINS4,GINS2,MCM8,PCNA,POLA2,GINS3,POLA1,POLD1,PRIM1,PRIM2,GINS1,DNA2,RFC2,RFC3,RFC4,RFC5,LIG1
Pathway	1269764	Mitotic G1-G1/S phases	BioSystems: REACTOME	4.933e-27	8.331e-24	1.19e-24	9.533e-24	46	145	MCM2,MCM3,MCM4,MCM5,MCM6,MCM7,MCM10,RRM2,LIN9,CDC7,CDC45,SKP1,SKP2,MYBL2,MCM8,DBF4,TFDP1,CCNA2,CCNB1,CCNE1,TK2,CCNE2,CDK1,CDC6,CDC25A,TOP2A,PCNA,CDK2,POLA2,TYMS,CKS1B,POLA1,POLE,POLE2,PRIM1,PRIM2,PSMB2,PSMD11,FBXO5,CDT1,RBL1,E2F1,E2F2,E2F3,E2F4,PSME3
Pathway	1269519	RHO GTPases Activate Formins	BioSystems: REACTOME	3.991e-26	6.74e-23	7.963e-24	6.378e-23	41	117	KIF18A,NUP85,SPC25,DSN1,NDC80,BIRC5,SPC24,RHOB,CENPI,CENPN,CENPK,RCC2,BUB1,BUB1B,KIF2C,ZWINT,CDC20,SKA1,AURKB,CENPA,CENPE,CENPF,PFN1,CENPM,NUP37,PLK1,CENPO,XPO1,CENPH,KNTC1,INCENP,NDE1,ERCC6L,CENPL,NUF2,DIAPH3,ZWILCH,RANGAP1,NUP107,CDCA8,MAD2L1
Pathway	83054	Cell cycle	BioSystems: KEGG	4.679e-26	7.902e-23	7.963e-24	6.378e-23	42	124	MCM2,MCM3,MCM4,MCM5,MCM6,MCM7,CDC7,CDC45,SKP1,SKP2,DBF4,BUB1,BUB1B,TFDP1,CCNA2,CCNB1,PKMYT1,CCNE1,CCNB2,CCNE2,CHEK2,CDK1,CDC6,CDC20,CDC25A,CDC25B,CDC25C,PCNA,CDK2,HDAC2,PTTG1,CHEK1,TTK,PLK1,PRKDC,ESPL1,RBL1,E2F1,E2F2,E2F3,E2F4,MAD2L1
Pathway	1269875	DNA Replication	BioSystems: REACTOME	4.715e-26	7.963e-23	7.963e-24	6.378e-23	40	111	MCM2,MCM3,MCM4,MCM5,MCM6,MCM7,MCM10,CDC7,CDC45,FEN1,GINS4,GINS2,MCM8,DBF4,CCNA2,CDC6,PCNA,CDK2,POLA2,GINS3,POLA1,POLD1,POLE,POLE2,PRIM1,PRIM2,PSMB2,PSMD11,GINS1,CDT1,DNA2,E2F1,E2F2,E2F3,RFC2,RFC3,RFC4,RFC5,LIG1,PSME3
Pubmed	20360068	Systematic analysis of human protein complexes identifies chromosome segregation proteins.	Pubmed	5.45e-115	2.383e-110	2.383e-110	2.683e-109	179	1341	NUSAP1,SF3B4,NUP85,FBL,HJURP,SPC25,ACTL6A,DSN1,LIN9,FANCE,FANCB,CEP78,NDC80,MKI67,TACC3,PPIH,DCAF15,MYBBP1A,SFPQ,CHERP,NOP56,RAE1,TRA2B,CALCOCO1,DTL,BIRC5,SKP1,SKP2,PABPC1,SPAG5,SPC24,NOP58,IGF2BP3,RUVBL1,TPX2,SMARCA4,RACGAP1,SMARCD1,EIF3B,USP39,SNRPA1,SNRPB,SNRPD1,CDCA5,SNRPF,KDM1A,MYBL2,TGS1,SAAL1,GARS,WDR43,BLM,AURKA,RTKN2,NEK2,RRP12,BUB1,POP1,BUB1B,TIMELESS,NOP2,GCN1,CNOT3,SYNE1,UBE2C,HAUS5,T…
Pubmed	25921289	Temporal proteomics of NGF-TrkA signaling identifies an inhibitory role for the E3 ligase Cbl-b in neuroblastoma cell differentiation.	Pubmed	1.653e-111	7.225e-107	3.613e-107	4.069e-106	203	1922	BRIX1,ABCF1,NUP85,ACAT1,FBL,LSG1,MARS,MCM2,MCM3,MCM4,MCM5,MCM6,MCM7,LRRC59,ACTL6A,MCM10,RRM1,RRM2,CDC45,FANCD2,NDC80,XPO5,FEN1,RBM14,TACC3,CARM1,MYBBP1A,SFPQ,CHERP,TRA2B,BZW2,TUBB,BEND3,SMPD4,MSH2,DDX55,SMC2,PABPC1,DDX27,YARS,DNAJC2,KHSRP,SRRT,NOP58,IGF2BP3,RUVBL1,CCT5,CHTF18,SMARCA4,PDCD11,UHRF1,SMARCD1,EIF3B,USP39,SNRPA,FIGNL1,CPSF3,KDM1A,UBAP2,RRP1B,GARS,GART,HNRNPM,SRM,NASP,SRPK1,SSRP1,RCC2,N…
Pubmed	24711643	Identifying biological pathways that underlie primordial short stature using network analysis.	Pubmed	9.913e-111	4.334e-106	1.445e-106	1.627e-105	158	1024	BRIX1,CHAF1B,ABCF1,NUP85,ACAT1,FBL,MARS,MCM2,MCM3,MCM4,MCM5,MCM6,MCM7,LRRC59,TUBA1B,MFAP2,WDR75,MKI67,RBM14,MYBBP1A,SFPQ,CHERP,NOP56,RAE1,TRA2B,GTSE1,MSH2,SMC2,PABPC1,DDX27,RRP1,KHSRP,SRRT,NOP58,IGF2BP3,RUVBL1,CCT5,SMARCA4,RACGAP1,PDCD11,UHRF1,EIF3B,USP39,SNRPA,SNRPA1,SNRPB,SNRPD1,KDM1A,RRP1B,GART,UTP14A,SSRP1,RCC2,WDR43,NUP205,RNPS1,RRS1,RRP12,GLUD1,BOP1,STIP1,NOP2,GCN1,CAD,TCOF1,YBX1,SYNE1,GRK6…
Pubmed	21145461	Dynamics of cullin-RING ubiquitin ligase network revealed by systematic quantitative proteomics.	Pubmed	1.564e-89	6.839e-85	1.71e-85	1.926e-84	171	1698	BRIX1,SF3B4,ABCF1,ACAT1,FBL,MARS,MCM2,MCM3,MCM6,MCM7,LRRC59,ACTL6A,RRM1,CDC45,HIST1H2AJ,HIST1H2AL,MKI67,RBM14,NR3C2,PPIH,GPRASP2,CARM1,MYBBP1A,SFPQ,NOP56,RAE1,TRA2B,NOP16,DTL,TUBB,SMPD4,PDCD2L,LYAR,DDX55,SKP1,SKP2,PABPC1,KHSRP,SRRT,NOP58,IGF2BP3,RUVBL1,CCT5,NUDT1,PSMG1,SMARCA4,RACGAP1,PDCD11,USP39,SNRPA,SNRPA1,SNRPB,SNRPC,SNRPD1,SNRPF,UBAP2,RRP1B,MTHFD2,GARS,GART,HNRNPM,SRPK1,NDUFA5,SSRP1,NUP205,…
Pubmed	20467437	Direct interaction between hnRNP-M and CDC5L/PLRG1 proteins affects alternative splice site choice.	Pubmed	7.216e-79	3.155e-74	6.31e-75	7.107e-74	104	581	SF3B4,MCM5,FANCD2,TUBA1B,NDC80,XPO5,FEN1,TTF2,MYBBP1A,SFPQ,CHERP,RAE1,TUBB,MSH2,SMC2,INTS8,NSUN5,RUVBL1,CCT5,TPX2,SMARCA4,RACGAP1,USP39,SNRPA,SNRPA1,SNRPD1,CPSF3,HNRNPM,BLM,GMPS,AURKA,NCAPG,BUB1,BUB1B,UBE2S,GCN1,KIF2C,TUBA1C,WDR5,NCAPH,CCNB1,CCT6A,MSH6,SF3B3,TMPO,CDK1,SCRIB,CDC20,TOP2A,AURKB,HELLS,RAVER1,NOLC1,GTPBP4,U2AF2,CHEK1,TRIP13,TTK,HNRNPAB,HNRNPD,TUBG1,EFTUD2,ANLN,NUP37,CPSF1,UMPS,PLK1,VR…
Pubmed	17081983	Global, in vivo, and site-specific phosphorylation dynamics in signaling networks.	Pubmed	1.08e-76	4.721e-72	7.868e-73	8.861e-72	151	1546	CHAF1B,ABCF1,MCM2,MCM3,MCM4,ACTL6A,EZH2,DSN1,LIN9,WDR75,SERINC1,MKI67,RBM14,MYBBP1A,SFPQ,NOP56,TRA2B,BZW2,ATAD2,SKP2,INTS8,DNAJC2,KHSRP,SRRT,NOP58,CEP72,TPX2,PUS1,SMARCA4,RACGAP1,PDCD11,UHRF1,EIF3B,USP39,PRR11,REEP4,CLSPN,TDP1,CDCA5,KDM1A,MYBL2,CENPN,WDR4,RRP1B,UTP14A,HNRNPM,PBK,NASP,SRPK1,SSRP1,CCNK,RCC2,WDR43,NCAPG,BRCA1,RNPS1,RRP12,SUV39H1,EIF2S2,BYSL,BOP1,TIMELESS,STIP1,NOP2,KIF2C,CAD,TCOF1,A…
Pubmed	26638075	A Dynamic Protein Interaction Landscape of the Human Centrosome-Cilium Interface.	Pubmed	6.493e-74	2.839e-69	4.055e-70	4.567e-69	159	1820	NUP85,ACADSB,LSG1,SPC25,MCM2,LRRC59,NOL10,MCM10,RRM1,RRM2,TUBA1B,NDC80,XPO5,PPIH,MOCS2,TRAF7,TTF2,RAE1,TRA2B,ARL6IP5,GTSE1,TUBB,SMPD4,NBEA,PDCD2L,MSH2,STIL,CCDC77,SMC2,SPAG5,SPC24,NOP58,RUVBL1,CCT5,CEP72,PSMG1,PUS1,RACGAP1,PDCD11,REEP4,SNRPC,GEN1,DEPDC1B,PLK4,KDM1A,CENPJ,GARS,HNRNPM,SRPK1,NDUFA5,SSRP1,NUP205,SHKBP1,BLM,AURKA,NEK2,GLUD1,VAMP2,STIP1,ZNF598,NOP2,CNOT3,KIF2C,CAD,TCOF1,TUBA1C,HAUS5,OD…
Pubmed	19738201	Proteomic analysis of integrin-associated complexes identifies RCC2 as a dual regulator of Rac1 and Arf6.	Pubmed	5.685e-71	2.485e-66	3.107e-67	3.499e-66	105	708	ABCF1,ACAT1,FBL,MARS,MCM2,MCM3,MCM4,MCM5,MCM6,MCM7,LRRC59,TUBA1B,XPO5,FEN1,RBM14,PPIH,SFPQ,RAE1,BZW2,TUBB,PABPC1,YARS,KHSRP,NOP58,IGF2BP3,CCT5,PSMG1,EIF3B,USP39,SNRPA,SNRPA1,SNRPB,SNRPD1,SNRPF,GART,HNRNPM,SRM,NDUFA5,SSRP1,RCC2,NUP205,GMPS,GLUD1,BYSL,STIP1,GCN1,KIF2C,YBX1,TFRC,CCT6A,TK1,PA2G4,PAFAH1B3,HIST1H1B,CDK1,NUP188,SCRIB,TOP2A,PCNA,RAVER1,GTPBP4,ATXN2L,CFL1,HMGB2,RCC1,HMGA1,PFN1,HNRNPAB,HNR…
Pubmed	22586326	Functional proteomics establishes the interaction of SIRT7 with chromatin remodeling complexes and expands its role in regulation of RNA polymerase I transcription.	Pubmed	4.497e-70	1.966e-65	2.184e-66	2.46e-65	101	653	BRIX1,ABCF1,ACAT1,FBL,MCM4,MCM5,MCM6,NOL10,WDR75,XPO5,MKI67,MYBBP1A,SFPQ,CHERP,DHX37,BEND3,MSH2,ATAD2,PABPC1,DDX27,RRP1,KHSRP,NOP58,IGF2BP3,CCT5,SMARCA4,PDCD11,CPSF3,KDM1A,RRP1B,GART,UTP14A,SRPK1,RCC2,WDR43,NUP205,BLM,GMPS,RRS1,RRP12,POP1,BYSL,BOP1,NOP2,GCN1,CAD,TCOF1,TUBA1C,LMNB2,HNRNPUL1,MSH6,H2AFX,NUP188,HCFC1,HDAC2,MTA2,NOLC1,GTPBP4,ATXN2L,CENPF,U2AF2,GNL2,CPSF1,NOC4L,CCDC86,KIF23,DCAF13,MTHF…
Pubmed	22863883	A high-throughput approach for measuring temporal changes in the interactome.	Pubmed	5.259e-70	2.299e-65	2.299e-66	2.59e-65	140	1456	NUSAP1,ABCF1,NUP85,MARS,SPC25,MCM2,MCM3,MCM4,MCM5,MCM6,MCM7,RRM1,FANCD2,HIST1H2BO,XPO5,FEN1,CARM1,RNASEH2A,BZW2,TUBB,GINS4,MSH2,SMC2,PABPC1,YARS,KHSRP,SPC24,SRRT,IGF2BP3,RUVBL1,CCT5,PSMG1,PUS1,GINS2,EIF3B,LSM2,SNRPA,SNRPA1,SNRPB,SNRPD1,SNRPF,WDR4,RPP40,GARS,GART,HNRNPM,NASP,SSRP1,RCC2,NUP205,GMPS,NCAPG,POP1,BUB1B,EIF2S2,BYSL,BOP1,TIMELESS,STIP1,NME1,GCN1,ADRM1,YBX1,TUBA1C,HNRNPUL1,NCAPH,EXOSC2,CC…
Interaction	int:OBSL1	OBSL1 interactions		4.163e-43	4.067e-39	4.067e-39	3.972e-38	121	640	BRIX1,CHAF1B,ABCF1,NUP85,FBL,MCM2,MCM3,MCM5,MCM6,MCM7,LRRC59,TUBA1B,WDR75,MKI67,RBM14,MYBBP1A,SFPQ,CHERP,NOP56,RAE1,TRA2B,PABPC1,DDX27,RRP1,KHSRP,SRRT,NOP58,IGF2BP3,RUVBL1,CCT5,SMARCA4,PDCD11,UHRF1,USP39,SNRPA,SNRPA1,SNRPB,SNRPD1,KDM1A,RRP1B,UTP14A,SSRP1,RCC2,WDR43,NUP205,RNPS1,RRS1,RRP12,BOP1,NOP2,GCN1,CAD,TCOF1,YBX1,SYNE1,LMNB2,HNRNPUL1,CCT6A,SF3B3,PA2G4,TMPO,CDK1,NUP188,SCRIB,TOP2A,PCNA,HDAC2,…
Interaction	int:EED	EED interactions		1.377e-35	1.345e-31	6.725e-32	6.566e-31	166	1316	BRIX1,ABCF1,NUP85,FBL,MARS,MCM2,MCM3,MCM4,MCM5,MCM6,MCM7,NOL10,RRM1,EZH2,FANCD2,TUBA1B,XPO5,NIP7,RBM14,FHL1,CARM1,MYBBP1A,SFPQ,NOP56,TRA2B,MYO19,TUBB,SMPD4,MSH2,SMC2,ATAD2,SKP1,INTS8,PABPC1,DDX27,KHSRP,SRRT,NSUN5,NOP58,RUVBL1,CCT5,RHEBL1,SMARCA4,PDCD11,SMARCD1,EIF3B,SNRPA,SNRPA1,SNRPD1,CPSF3,SNRPF,KDM1A,TGS1,RRP1B,GARS,GART,UTP14A,HNRNPM,SSRP1,WDR43,NUP205,GMPS,BRCA1,RNPS1,RRS1,RRP12,KDM2B,BOP1,N…
Interaction	int:CDK1	CDK1 interactions		2.98e-35	2.911e-31	9.704e-32	9.476e-31	72	275	CHAF1B,MCM4,RRM2,EZH2,FANCA,FANCG,FEN1,MKI67,FOXM1,BIRC5,SKP2,SPAG5,CCT5,RACGAP1,CDCA5,PBK,NASP,CCNK,NCAPG,BRCA1,BRCA2,BUB1,PRC1,NCAPH,TFDP1,CCNA2,CCNB1,PKMYT1,CCNE1,CCNF,TK1,CCNB2,HIST1H1B,CDK1,CDC6,CDC20,CDC25A,CDC25B,CDC25C,TOP2A,PCNA,CDK2,TP73,HDGF,CDKN3,PTTG1,RCC1,CHEK1,HMGA1,CKS1B,CKS2,UBE2I,POLA1,KIF20B,ESPL1,ZBTB16,NDE1,DLGAP5,CDCA2,FBXO5,NCAPD2,SLBP,CDT1,KIF11,E2F1,E2F3,E2F4,STMN1,ECT2,C…
Interaction	int:CDC5L	CDC5L interactions		9.136e-33	8.926e-29	2.231e-29	2.179e-28	102	590	SF3B4,MCM3,MCM4,MCM5,MCM10,FANCD2,TUBA1B,NDC80,XPO5,FEN1,TTF2,MYBBP1A,SFPQ,CHERP,TUBB,MSH2,SMC2,INTS8,NSUN5,RUVBL1,CCT5,TPX2,SMARCA4,RACGAP1,SMARCD1,USP39,SNRPA,SNRPA1,SNRPD1,CPSF3,KDM1A,UTP14A,HNRNPM,GMPS,BUB1,BUB1B,EIF2S2,UBE2S,NOP2,GCN1,KIF2C,SYNE1,TUBA1C,NCAPH,CCNB1,CCT6A,MSH6,SF3B3,TMPO,SCRIB,CDC20,CDC25B,TOP2A,CDK2,AURKB,HDGF,HELLS,RAVER1,NOLC1,U2AF2,CHEK1,TRIP13,TUBG1,EFTUD2,ANLN,UMPS,PLK1…
Interaction	int:NTRK1	NTRK1 interactions		9.924e-32	9.696e-28	1.939e-28	1.893e-27	203	1956	BRIX1,ABCF1,NUP85,ACAT1,FBL,LSG1,MARS,MCM2,MCM3,MCM4,MCM5,MCM6,MCM7,LRRC59,ACTL6A,MCM10,RRM1,RRM2,CDC45,FANCD2,NDC80,XPO5,FEN1,RBM14,TACC3,CARM1,MYBBP1A,SFPQ,CHERP,TRA2B,BZW2,TUBB,BEND3,SMPD4,MSH2,DDX55,SMC2,PABPC1,DDX27,YARS,DNAJC2,KHSRP,SRRT,NOP58,IGF2BP3,RUVBL1,CCT5,CHTF18,SMARCA4,PDCD11,UHRF1,SMARCD1,EIF3B,USP39,SNRPA,FIGNL1,CPSF3,KDM1A,UBAP2,RRP1B,GARS,GART,HNRNPM,SRM,NASP,SRPK1,SSRP1,RCC2,N…
Interaction	int:CUL7	CUL7 interactions		2.406e-29	2.35e-25	3.917e-26	3.825e-25	103	658	BRIX1,ACAT1,FBL,MARS,MCM7,LRRC59,TUBA1B,WDR75,MKI67,RBM14,MYBBP1A,SFPQ,NOP56,RAE1,SKP1,PABPC1,DDX27,KHSRP,SRRT,NOP58,IGF2BP3,RUVBL1,CCT5,RACGAP1,PDCD11,USP39,SNRPA,SNRPA1,SNRPB,RRP1B,GART,SSRP1,RCC2,WDR43,NUP205,APEX2,RNPS1,RRS1,RRP12,GLUD1,BOP1,STIP1,NOP2,GCN1,CAD,TCOF1,YBX1,LMNB2,HNRNPUL1,TFRC,CCT6A,SF3B3,PA2G4,PAFAH1B3,TMPO,CDK1,HADHB,TOP2A,PCNA,HDAC2,AURKB,NOLC1,GTPBP4,PPAN,CENPF,CFL1,U2AF2,R…
Interaction	int:CDK2	CDK2 interactions		6.209e-29	6.066e-25	8.666e-26	8.462e-25	104	677	CHAF1B,FBL,MCM2,MCM3,MCM4,MCM6,MCM7,ACTL6A,RRM1,EZH2,CDC7,CDC45,FEN1,FOXM1,SFPQ,BIRC5,MSH2,SKP1,SKP2,YARS,KHSRP,IGF2BP3,UBE2T,CCT5,SNRPA,SNRPF,MYBL2,GARS,HNRNPM,NASP,CCNK,RCC2,BRCA1,BRCA2,DBF4,BUB1,NOP2,GCN1,CAD,TCOF1,TUBA1C,PRC1,TFDP1,CCNA2,CCNB1,CCNE1,CCT6A,SF3B3,PA2G4,CCNB2,CCNE2,HIST1H1B,CDK1,HADHB,CDC6,CDC20,CDC25A,CDC25B,CDC25C,HCFC1,PCNA,CDK2,TP73,CDKN3,CFL1,HMGB2,HMGA1,PFN1,TTK,HNRNPD,TUB…
Interaction	int:SIRT7	SIRT7 interactions		2.546e-28	2.487e-24	3.109e-25	3.036e-24	102	665	BRIX1,ABCF1,ACAT1,FBL,MCM4,MCM5,MCM6,NOL10,WDR75,XPO5,MKI67,MYBBP1A,SFPQ,CHERP,DHX37,BEND3,MSH2,ATAD2,PABPC1,DDX27,RRP1,KHSRP,NOP58,IGF2BP3,CCT5,SMARCA4,PDCD11,CPSF3,KDM1A,RRP1B,GART,UTP14A,SRPK1,RCC2,WDR43,NUP205,BLM,GMPS,AURKA,RRS1,RRP12,POP1,BYSL,BOP1,NOP2,GCN1,CAD,TCOF1,TUBA1C,LMNB2,HNRNPUL1,MSH6,H2AFX,NUP188,HCFC1,HDAC2,MTA2,NOLC1,GTPBP4,ATXN2L,CENPF,U2AF2,GNL2,CPSF1,NOC4L,CCDC86,KIF23,DCAF1…
Interaction	int:HIST1H3A	HIST1H3A interactions		4.242e-26	4.145e-22	4.605e-23	4.496e-22	62	280	NUSAP1,CHAF1B,BRIP1,ATAD5,LRRK2,MCM2,MCM4,MCM5,MCM6,MCM7,WDR76,EZH2,CDC45,CARM1,ATAD2,ASF1B,SMARCA4,UHRF1,CDCA5,KDM1A,NASP,SSRP1,SUV39H1,DNAJC9,KDM2B,CBX2,HIST1H3F,WDR5,PRC1,HIST1H1B,CBX7,H2AFX,H2AFZ,HDAC2,AURKB,HDGF,MTA2,HMGB3,RCC1,EID1,PRMT1,VRK1,KIF23,PRKDC,KIF18B,GATAD2A,INCENP,PHF19,DAXX,ARHGAP11A,CDCA2,KIF11,KIFC1,KIF22,DNMT3A,CHAF1A,IPO4,CDCA8,PALB2,HMGA2,TRIM28,MAD2L1
Interaction	int:CUL3	CUL3 interactions		1.314e-24	1.284e-20	1.284e-21	1.254e-20	138	1218	BRIX1,SF3B4,ACAT1,FBL,MARS,MCM3,MCM6,MCM7,ACTL6A,WDR76,EZH2,CDC45,RBM14,PPIH,GPRASP2,CARM1,MYBBP1A,NOP56,RAE1,DCUN1D5,TRA2B,NACC1,TUBB,LYAR,SKP1,PABPC1,KHSRP,SRRT,IGF2BP3,RUVBL1,CCT5,SMARCA4,PDCD11,SNRPA,SNRPA1,SNRPB,SNRPC,SNRPD1,SNRPF,UBAP2,RRP1B,MTHFD2,GART,HNRNPM,SRPK1,NDUFA5,NUP205,SHKBP1,GMPS,AURKA,NCAPG,RNPS1,RRS1,RRP12,GLUD1,POP1,DNAJC9,BOP1,TAF5,NOP2,CAD,YBX1,TUBA1C,WDR5,HNRNPUL1,CCNE1,CC…
Transcription Factor Binding Site	V$E2F_Q6	V$E2F_Q6		1.026e-33	6.087e-31	5.994e-31	4.174e-30	58	182	MAZ,MCM2,MCM3,MCM4,MCM6,MCM7,RRM2,EZH2,CDC45,FANCD2,ALDH6A1,TRA2B,MSH2,ATAD2,ARHGAP6,CLSPN,SNRPD1,GEN1,MCM8,NASP,DNAJC9,TOPBP1,HNRNPUL1,PHF5A,TFAP4,PKMYT1,H2AFZ,TMPO,CDK1,CDC6,CDC25A,RAVER1,NOLC1,E2F7,NUP62,POLA2,HNRNPD,HIST1H2AH,ZNF367,POLD1,POLE2,PAQR4,PRKDC,MXD3,ILF3,ARHGAP11A,STK35,FBXO5,CDT1,DNMT1,KPNB1,RAD51,RANBP1,RBL1,E2F1,E2F3,STMN1,CDCA7
Transcription Factor Binding Site	V$E2F_Q4	V$E2F_Q4		2.021e-33	1.199e-30	5.994e-31	4.174e-30	58	184	MAZ,MCM2,MCM3,MCM4,MCM6,MCM7,RRM2,EZH2,CDC45,FANCD2,ALDH6A1,TRA2B,MSH2,ATAD2,ARHGAP6,CLSPN,SNRPD1,GEN1,MCM8,NASP,DNAJC9,TOPBP1,HNRNPUL1,PHF5A,TFAP4,PKMYT1,H2AFZ,TMPO,CDK1,CDC6,CDC25A,RAVER1,NOLC1,E2F7,NUP62,POLA2,HNRNPD,HIST1H2AH,ZNF367,POLD1,POLE2,PAQR4,PRKDC,MXD3,ILF3,ARHGAP11A,STK35,FBXO5,CDT1,DNMT1,KPNB1,RAD51,RANBP1,RBL1,E2F1,E2F3,STMN1,CDCA7
Transcription Factor Binding Site	V$E2F1_Q6	V$E2F1_Q6		7.977e-33	4.73e-30	1.577e-30	1.098e-29	57	181	MAZ,MCM2,MCM3,MCM4,MCM6,MCM7,RRM2,EZH2,FANCD2,FANCG,ALDH6A1,TRA2B,MSH2,ATAD2,ARHGAP6,CLSPN,SNRPD1,GEN1,MCM8,NASP,SUV39H1,TOPBP1,HNRNPUL1,PHF5A,TFAP4,PKMYT1,H2AFZ,TMPO,CDK1,CDC6,CDC25A,RAVER1,NOLC1,E2F7,NUP62,HMGA1,HNRNPD,HIST1H2AH,ZNF367,POLD1,POLE2,PAQR4,PRKDC,MXD3,ILF3,ARHGAP11A,STK35,FBXO5,CDT1,DNMT1,KPNB1,RANBP1,RBL1,E2F1,E2F3,STMN1,CDCA7
Transcription Factor Binding Site	V$E2F4DP1_01	V$E2F4DP1_01		1.083e-31	6.423e-29	1.606e-29	1.118e-28	57	189	MAZ,MCM2,MCM3,MCM4,MCM6,MCM7,RRM2,EZH2,FANCD2,FANCG,ALDH6A1,TRA2B,MSH2,ATAD2,ARHGAP6,CLSPN,SNRPD1,GEN1,MCM8,NASP,SUV39H1,DNAJC9,TOPBP1,HNRNPUL1,PHF5A,TFAP4,PKMYT1,H2AFZ,TMPO,CDK1,CDC6,CDC25A,RAVER1,NOLC1,E2F7,NUP62,HMGA1,HNRNPD,HIST1H2AH,ZNF367,POLD1,POLE2,PAQR4,PRKDC,MXD3,ILF3,ARHGAP11A,STK35,FBXO5,DNMT1,RANBP1,RBL1,E2F1,E2F3,STMN1,LIG1,CDCA7
Transcription Factor Binding Site	V$E2F4DP2_01	V$E2F4DP2_01		2.245e-31	1.331e-28	1.902e-29	1.324e-28	56	184	MAZ,MCM2,MCM3,MCM4,MCM6,MCM7,RRM2,EZH2,FANCD2,FANCG,ALDH6A1,TRA2B,MSH2,ATAD2,ARHGAP6,CLSPN,SNRPD1,GEN1,MCM8,NASP,SUV39H1,DNAJC9,TOPBP1,HNRNPUL1,PHF5A,TFAP4,PKMYT1,H2AFZ,TMPO,CDK1,CDC6,CDC25A,RAVER1,NOLC1,E2F7,NUP62,HMGA1,HNRNPD,HIST1H2AH,ZNF367,POLD1,POLE2,PAQR4,PRKDC,MXD3,ILF3,ARHGAP11A,STK35,FBXO5,DNMT1,RANBP1,RBL1,E2F1,E2F3,STMN1,CDCA7
Transcription Factor Binding Site	V$E2F1DP1_01	V$E2F1DP1_01		2.245e-31	1.331e-28	1.902e-29	1.324e-28	56	184	MAZ,MCM2,MCM3,MCM4,MCM6,MCM7,RRM2,EZH2,FANCD2,FANCG,ALDH6A1,TRA2B,MSH2,ATAD2,ARHGAP6,CLSPN,SNRPD1,GEN1,MCM8,NASP,SUV39H1,DNAJC9,TOPBP1,HNRNPUL1,PHF5A,TFAP4,PKMYT1,H2AFZ,TMPO,CDK1,CDC6,CDC25A,RAVER1,NOLC1,E2F7,NUP62,HMGA1,HNRNPD,HIST1H2AH,ZNF367,POLD1,POLE2,PAQR4,PRKDC,MXD3,ILF3,ARHGAP11A,STK35,FBXO5,DNMT1,RANBP1,RBL1,E2F1,E2F3,STMN1,CDCA7
Transcription Factor Binding Site	V$E2F1DP2_01	V$E2F1DP2_01		2.245e-31	1.331e-28	1.902e-29	1.324e-28	56	184	MAZ,MCM2,MCM3,MCM4,MCM6,MCM7,RRM2,EZH2,FANCD2,FANCG,ALDH6A1,TRA2B,MSH2,ATAD2,ARHGAP6,CLSPN,SNRPD1,GEN1,MCM8,NASP,SUV39H1,DNAJC9,TOPBP1,HNRNPUL1,PHF5A,TFAP4,PKMYT1,H2AFZ,TMPO,CDK1,CDC6,CDC25A,RAVER1,NOLC1,E2F7,NUP62,HMGA1,HNRNPD,HIST1H2AH,ZNF367,POLD1,POLE2,PAQR4,PRKDC,MXD3,ILF3,ARHGAP11A,STK35,FBXO5,DNMT1,RANBP1,RBL1,E2F1,E2F3,STMN1,CDCA7
Transcription Factor Binding Site	V$E2F_02	V$E2F_02		2.269e-30	1.345e-27	1.682e-28	1.171e-27	55	184	MAZ,MCM2,MCM3,MCM4,MCM6,MCM7,RRM2,EZH2,FANCD2,FANCG,ALDH6A1,TRA2B,MSH2,ATAD2,ARHGAP6,CLSPN,SNRPD1,GEN1,MCM8,NASP,SUV39H1,TOPBP1,HNRNPUL1,PHF5A,TFAP4,PKMYT1,H2AFZ,TMPO,CDK1,CDC6,CDC25A,RAVER1,NOLC1,E2F7,NUP62,HMGA1,HNRNPD,HIST1H2AH,ZNF367,POLD1,POLE2,PAQR4,PRKDC,MXD3,ILF3,ARHGAP11A,STK35,FBXO5,DNMT1,RANBP1,RBL1,E2F1,E2F3,STMN1,CDCA7
Transcription Factor Binding Site	SGCGSSAAA_V$E2F1DP2_01	SGCGSSAAA_V$E2F1DP2_01		4.625e-30	2.742e-27	3.047e-28	2.122e-27	47	131	MAZ,MCM2,MCM3,MCM4,MCM6,MCM7,RRM2,FANCG,ALDH6A1,TRA2B,MSH2,ATAD2,ARHGAP6,CLSPN,SNRPD1,GEN1,NASP,SUV39H1,DNAJC9,TOPBP1,HNRNPUL1,PHF5A,TFAP4,PKMYT1,H2AFZ,CDC6,CDC25A,RAVER1,NOLC1,NUP62,HMGA1,HNRNPD,HIST1H2AH,ZNF367,POLD1,POLE2,PAQR4,PRKDC,MXD3,ILF3,STK35,FBXO5,DNMT1,RANBP1,E2F1,E2F3,CDCA7
Transcription Factor Binding Site	V$E2F1_Q6_01	V$E2F1_Q6_01		8.18e-27	4.851e-24	4.851e-25	3.378e-24	52	189	MAZ,MCM2,MCM3,MCM4,MCM6,MCM7,EZH2,CDC45,FANCG,MSH2,ATAD2,ARHGAP6,CLSPN,GEN1,MCM8,PPRC1,NASP,DLEU2,SUV39H1,CNOT3,TOPBP1,CASP2,HNRNPUL1,PHF5A,TFAP4,PKMYT1,TMPO,CDC25A,RAVER1,NOLC1,POLA2,HNRNPD,HIST1H2AH,ZNF367,POLE2,PAQR4,PRKDC,ESPL1,MXD3,ILF3,ARHGAP11A,STK35,FBXO5,DNMT1,RAD51,RANBP1,RBL1,E2F1,E2F3,STMN1,HMGA2,CDCA7
Gene Family	548	Fanconi anemia complementation groups	genenames.org	8.117e-17	1.761e-14	1.761e-14	1.05e-13	13	20	BRIP1,FANCA,FANCD2,FANCE,FANCB,FANCG,UBE2T,BRCA1,BRCA2,XRCC2,RAD51,PALB2,FANCI
Gene Family	622	Kinesins|Protein phosphatase 1 regulatory subunits	genenames.org	1.815e-13	3.938e-11	1.969e-11	1.173e-10	15	46	KIF18A,KIF2C,KIF4B,CENPE,KIF24,KIF23,KIF20B,KIF18B,KIF4A,KIF15,KIF14,KIF11,KIFC1,KIF22,KIF20A
Gene Family	725	RNA binding motif containing	genenames.org	1.405e-10	3.049e-08	1.016e-08	6.057e-08	25	213	SF3B4,RBM14,RBM38,SFPQ,TRA2B,CPEB3,PABPC1,IGF2BP3,CPEB4,EIF3B,SNRPA,PPRC1,HNRNPM,RDM1,RNPS1,PABPC3,RAVER1,U2AF2,HNRNPAB,HNRNPD,HNRNPL,CSTF2,PTBP1,RBM28,DAZAP1
Gene Family	1085	MCM family	genenames.org	1.984e-10	4.306e-08	1.077e-08	6.416e-08	7	9	MCM2,MCM3,MCM4,MCM5,MCM6,MCM7,MCM8
Gene Family	694	Protein phosphatase 1 regulatory subunits	genenames.org	9.323e-10	2.023e-07	4.046e-08	2.411e-07	22	181	KIF18A,MCM7,MKI67,SFPQ,TRA2B,RRP1B,AURKA,NEK2,BRCA1,EIF2S2,CASP2,PKMYT1,NOM1,CDC25C,HCFC1,AURKB,CENPE,PLCL1,NOC2L,CDCA2,DLG2,TRIM28
Gene Family	362	WD repeat domain containing|Protein phosphatase 2 regulatory subunits|STRIPAK complex	genenames.org	2.36e-09	5.121e-07	8.535e-08	5.086e-07	26	262	CHAF1B,WDR76,WDR75,TRAF7,RAE1,DTL,NBEA,THOC3,WDR4,WDR43,SHKBP1,BOP1,TAF5,WDR5,GTF3C2,WDHD1,CDC20,NUP37,STRN4,WDR77,DCAF13,POC1A,GNB1L,PWP2,WDR62,RFWD3
Gene Family	413	AAA ATPases	genenames.org	5.324e-09	1.155e-06	1.65e-07	9.835e-07	12	53	ATAD5,ATAD2,RUVBL1,CHTF18,FIGNL1,TRIP13,RFC2,RFC3,RFC4,RFC5,ATAD3B,ATAD3A
Gene Family	982	E2F transcription factors	genenames.org	6.271e-09	1.361e-06	1.701e-07	1.014e-06	6	8	E2F7,E2F1,E2F2,E2F3,E2F4,E2F8
Gene Family	1051	Nucleoporins	genenames.org	5.838e-08	1.267e-05	1.408e-06	8.389e-06	9	32	NUP85,RAE1,NUP205,NUP188,NUP62,NUP37,NUP155,NUP93,NUP107
Gene Family	931	GINS complex	genenames.org	3.927e-07	8.522e-05	7.747e-06	4.617e-05	4	4	GINS4,GINS2,GINS3,GINS1
Coexpression	18662380-S3-AURKA	Human Breast_Wirapati08_355genes_AURKA_Module	GeneSigDB	4.545e-223	4.549e-219	4.549e-219	4.453e-218	209	344	NUSAP1,CABLES2,KIF18A,CHAF1B,CENPW,HJURP,SPC25,MCM2,MCM3,MCM4,MCM6,ACTL6A,MND1,MCM10,RRM2,EZH2,DSN1,ABCA8,CDC7,CDC45,FANCA,TUBA1B,FANCG,NDC80,FEN1,MKI67,TOMM40,TACC3,PIF1,RAD54L,RBM38,FOXM1,NOP56,RAE1,NOP16,RNASEH2A,GTSE1,CALCOCO1,DTL,BIRC5,DEPDC1,STIL,ATAD2,SPAG5,SPC24,RAD51AP1,UBE2T,CCT5,NUDT1,ASF1B,FAM72A,TPX2,RACGAP1,UHRF1,GINS2,POLQ,SNRPA1,SNRPC,SNRPD1,CDCA5,SNRPF,DEPDC1B,PLK4,MYBL2,CENPN,MT…
Coexpression	M2368	Genes up-regulated during later stage of differentiation of Oli-Neu cells (oligodendroglial precursor) in response to PD174265 [PubChem=4709].	MSigDB C2: CGP Curated Gene Sets (v6.0)	1.451e-209	1.453e-205	7.263e-206	7.11e-205	242	570	NUSAP1,KIF18A,CHAF1B,CENPW,NUP85,ATAD5,TRAIP,HJURP,SPC25,MCM2,MCM3,MCM4,MCM5,MCM6,MCM7,MCM10,RRM1,RRM2,WDR76,EZH2,LIN9,TRIM59,CDC7,CDC45,FANCA,FANCD2,NDC80,FEN1,MKI67,TACC3,PPIH,PIF1,RAD54L,FOXM1,TTF2,GTSE1,DTL,BEND3,BIRC5,DEPDC1,STIL,LYAR,CCDC77,SMC2,ATAD2,SKP2,PABPC1,SPAG5,SPC24,RAD51AP1,NOP58,UBE2T,ASF1B,CHTF18,C1orf112,FAM72A,CENPI,TPX2,RACGAP1,UHRF1,GINS2,LSM2,PRR11,CLSPN,CDCA5,FIGNL1,DEPDC1…
Coexpression	16141321-Table2	Human Breast_Miller05_p53	GeneSigDB	7.184e-187	7.19e-183	2.397e-183	2.346e-182	259	816	NUSAP1,CYB5D2,KIF18A,CHAF1B,ABAT,BRIP1,CENPW,ACADSB,HJURP,SPC25,ETFDH,MCM2,MCM4,MCM5,MCM6,NOL10,ACTL6A,MND1,MCM10,RRM2,EZH2,ABCA8,CDC7,CDC45,FANCA,FANCD2,NDC80,NIP7,FEN1,NME5,MKI67,TACC3,PPIH,FBXO45,PIF1,RAD54L,FOXM1,RNASEH2A,GTSE1,DTL,TUBB,BIRC5,DEPDC1,MSH2,STIL,SMC2,ATAD2,SKP2,YARS,SPAG5,DNAJC2,SPC24,RHOB,RAD51AP1,IGF2BP3,UBE2T,CCT5,NUDT1,ASF1B,PSMG1,CENPI,TPX2,TMEM189,SMARCA4,RACGAP1,UHRF1,GIN…
Coexpression	M2156	Genes up-regulated in MCF7 cells (breast cancer) at 24 h of estradiol [PubChem=5757] treatment.	MSigDB C2: CGP Curated Gene Sets (v6.0)	2.536e-177	2.538e-173	6.345e-174	6.211e-173	178	324	NUSAP1,CHAF1B,BRIP1,NUP85,ATAD5,TRAIP,MCM2,MCM3,MCM4,MCM5,MCM6,MCM7,MCM10,RRM1,RRM2,WDR76,DSN1,CDC45,FANCA,FANCD2,FANCG,CEP78,FEN1,MKI67,TACC3,RAD54L,FOXM1,TTF2,RNASEH2A,MYO19,GTSE1,DTL,BIRC5,STIL,SMC2,ATAD2,SKP2,SPAG5,SPC24,UBE2T,ASF1B,CHTF18,CENPI,TPX2,RACGAP1,UHRF1,GINS2,PRR11,CLSPN,POLQ,CDCA5,FIGNL1,DEPDC1B,PLK4,MYBL2,CENPJ,CENPN,MCM8,PBK,NASP,BLM,AURKA,NCAPG,BRCA1,BRCA2,SUV39H1,BUB1,BUB1B,TI…
Coexpression	M16010	Genes down-regulated in H1975 cells (non-small cell lung cancer, NSCLC) resistant to gefitinib [PubChem=123631] after treatment with EGFR inhibitor CL-387785 [PubChem=2776] for 24h.	MSigDB C2: CGP Curated Gene Sets (v6.0)	3.057e-163	3.06e-159	6.12e-160	5.991e-159	154	251	NUSAP1,HJURP,SPC25,MCM2,MCM3,MCM4,MCM5,MCM6,MCM7,MCM10,RRM1,RRM2,EZH2,DSN1,CDC45,TUBA1B,NDC80,FEN1,MKI67,NOP56,RNASEH2A,GTSE1,DTL,TUBB,BIRC5,DEPDC1,MSH2,STIL,SMC2,ATAD2,SPAG5,RAD51AP1,ASF1B,TPX2,RACGAP1,GINS2,SNRPA1,SNRPD1,PLK4,MYBL2,CENPN,PBK,SRM,BLM,AURKA,NEK2,NCAPG,BRCA1,DBF4,BUB1,BUB1B,DNAJC9,UBE2S,TIMELESS,NME1,PSRC1,KIF2C,TCOF1,UBE2C,LMNB2,PRC1,NCAPH,TFDP1,CCNA2,ZWINT,CCNB1,PKMYT1,CCNF,MSH6…
Coexpression	M14427	Genes down-regulated in nasopharyngeal carcinoma (NPC) compared to the normal tissue.	MSigDB C2: CGP Curated Gene Sets (v6.0)	1.74e-157	1.741e-153	2.902e-154	2.841e-153	290	1367	BRIX1,NUSAP1,KIF18A,CHAF1B,SF3B4,BRIP1,NUP85,FBL,MARS,HJURP,MCM2,MCM3,MCM4,MCM6,MCM7,MND1,MCM10,RRM1,RRM2,EZH2,DSN1,LIN9,CDC7,CDC45,FANCG,WDR75,CEP78,NDC80,XPO5,FEN1,MKI67,TOMM40,MMP12,RAD54L,FOXM1,TTF2,NOP56,TRA2B,NOP16,RNASEH2A,BZW2,MYO19,DTL,TUBB,BIRC5,DEPDC1,MSH2,LYAR,CCDC77,DDX55,SMC2,ATAD2,SKP2,INTS8,YARS,SPAG5,DNAJC2,KHSRP,RAD51AP1,NOP58,UBE2T,NUDT1,GALNT11,PSMG1,NXT1,FLAD1,CENPI,TPX2,PUS1…
Coexpression	17145885-SuppTable2	Human Lung_Kobayashi06_320genes	GeneSigDB	3.807e-156	3.81e-152	5.443e-153	5.328e-152	149	247	NUSAP1,HJURP,SPC25,MCM2,MCM3,MCM4,MCM5,MCM6,MCM7,MCM10,RRM1,RRM2,EZH2,DSN1,CDC45,NDC80,FEN1,MKI67,NOP56,RNASEH2A,GTSE1,DTL,TUBB,BIRC5,DEPDC1,MSH2,STIL,SMC2,ATAD2,SPAG5,RAD51AP1,ASF1B,TPX2,RACGAP1,GINS2,SNRPA1,SNRPD1,PLK4,MYBL2,CENPN,PBK,SRM,BLM,AURKA,NEK2,NCAPG,BRCA1,DBF4,BUB1,BUB1B,DNAJC9,TIMELESS,PSRC1,KIF2C,TCOF1,UBE2C,LMNB2,PRC1,NCAPH,TFDP1,CCNA2,ZWINT,CCNB1,PKMYT1,CCNF,MSH6,TK1,PA2G4,CCNE2,E…
Coexpression	M1744	Genes with promoters bound by E2F4 [GeneID=1874] in unstimulated hybridoma cells.	MSigDB C2: CGP Curated Gene Sets (v6.0)	5.924e-149	5.929e-145	7.411e-146	7.255e-145	218	727	BRIX1,NUSAP1,BRIP1,UFSP2,NUP85,TRAIP,HJURP,SPC25,MCM3,MCM4,MCM5,MCM6,MCM7,MND1,MCM10,RRM1,RRM2,WDR76,EZH2,CDC7,CDC45,FANCA,HIST1H2AL,FANCG,HIST1H2BH,HIST1H3G,NDC80,HIST1H3B,FEN1,TACC3,PPIH,ALDH6A1,PIF1,RAD54L,SFPQ,TRA2B,GTSE1,DTL,TUBB,SMPD4,BIRC5,DEPDC1,MSH2,STIL,SMC2,SKP2,RPUSD1,SPAG5,SPC24,RAD51AP1,NOP58,CEP72,ASF1B,CHTF18,NXT1,C1orf112,FLAD1,FAM72A,CENPI,TPX2,RACGAP1,UHRF1,MTBP,FAM189B,LSM2,PR…
Coexpression	20937356-TableS2	Rat Hypothalamic_Mansuy10_1931genes	GeneSigDB	3.297e-146	3.3e-142	3.667e-143	3.589e-142	269	1251	NUSAP1,KIF18A,CHAF1B,BRIP1,NUP85,ATAD5,FBL,MARS,TRAIP,SPC25,ETV4,MCM2,MCM6,MCM7,LRRC59,NOL10,MND1,MCM10,RRM2,EZH2,DSN1,LIN9,TRIM59,CDC7,FANCA,FANCD2,TUBA1B,WDR75,NDC80,NIP7,FEN1,TOMM40,TACC3,FOXM1,MYBBP1A,NOP56,DCUN1D5,TRA2B,DHX37,GTSE1,DTL,GINS4,MSH2,STIL,LYAR,SMC2,DDX27,YARS,DNAJC2,RRP1,RAD51AP1,NOP58,RUVBL1,UBE2T,CEP72,ASF1B,CHTF18,CENPI,TPX2,PUS1,RACGAP1,GINS2,PRR11,REEP4,CLSPN,POLQ,SNRPA,SNR…
Coexpression	17150101-TableS1h	Human Breast_Troester06_364genes_up_DOX-MCF7	GeneSigDB	1.458e-145	1.459e-141	1.459e-142	1.428e-141	150	282	KIF18A,NUP85,MAZ,SPC25,MCM2,MCM3,MCM6,MND1,MCM10,RRM1,RRM2,EZH2,DSN1,CDC7,CDC45,FANCA,FANCD2,FANCG,NDC80,MKI67,TACC3,RAD54L,FOXM1,TTF2,RNASEH2A,GTSE1,DTL,GINS4,SMPD4,BIRC5,DEPDC1,MSH2,STIL,SMC2,ATAD2,SPAG5,RAD51AP1,UBE2T,NUDT1,ASF1B,NXT1,TPX2,RACGAP1,UHRF1,GINS2,POLQ,CDCA5,FIGNL1,MYBL2,CENPN,GART,NASP,CENPK,BLM,AURKA,NCAPG,BRCA1,BRCA2,DBF4,BUB1,BUB1B,DNAJC9,UBE2S,TIMELESS,PSRC1,KIF2C,TCF3,ODF2,PR…
Coexpression Atlas	GSM399403_500	alpha beta T cells, T.ISP.Th, 4- 8+ TCR-/lo 24hi, Thymus, avg-3	Immgen.org, GSE15907	6.426e-178	2.45e-174	2.45e-174	2.162e-173	201	417	NUSAP1,KIF18A,CHAF1B,BRIP1,ATAD5,SPC25,MCM2,MCM3,MCM4,MCM5,MCM6,MCM7,MCM10,RRM1,RRM2,WDR76,EZH2,DSN1,TRIM59,CDC7,CDC45,FANCD2,FANCB,NDC80,FEN1,MKI67,TACC3,RAD54L,FOXM1,GTSE1,DTL,SMPD4,BIRC5,DEPDC1,STIL,LYAR,SMC2,ATAD2,SKP2,SPAG5,SPC24,RAD51AP1,NOP58,ASF1B,PSMG1,C1orf112,CENPI,TPX2,RACGAP1,UHRF1,MTBP,LSM2,PRR11,CLSPN,TDP1,POLQ,CDCA5,FIGNL1,GEN1,SNRPF,DEPDC1B,PLK4,MYBL2,CENPN,MCM8,PBK,NASP,CENPK,NU…
Coexpression Atlas	GSM399452_500	B cells, preB.FrC.BM, CD19+ IgM- CD45R+ CD43+ HSA+, Bone marrow, avg-3	Immgen.org, GSE15907	4.135e-171	1.577e-167	7.883e-168	6.956e-167	195	409	NUSAP1,KIF18A,CHAF1B,BRIP1,CENPW,ATAD5,HJURP,SPC25,MCM2,MCM3,MCM4,MCM5,MCM6,MCM7,MND1,MCM10,RRM1,RRM2,WDR76,EZH2,DSN1,TRIM59,CDC7,CDC45,FANCD2,FANCB,HIST1H2AL,HIST1H2BH,NDC80,FEN1,MKI67,TACC3,PIF1,RAD54L,FOXM1,GTSE1,DTL,BIRC5,DEPDC1,STIL,SMC2,ATAD2,SKP2,SPAG5,SPC24,RAD51AP1,ASF1B,C1orf112,CENPI,TPX2,SMARCA4,RACGAP1,UHRF1,PRR11,CLSPN,POLQ,CDCA5,FIGNL1,GEN1,DEPDC1B,PLK4,MYBL2,CENPN,MCM8,PBK,NASP,CE…
Coexpression Atlas	PCBC_ratio_SC_vs_MESO-15_cfr-2X-p05	Pluripotent Stem Cells_vs_Mesoderm Day 15-Confounder_removed-fold2.0_adjp0.05	PCBC_AltAnalyze	2.297e-161	8.758e-158	2.919e-158	2.576e-157	356	1976	BRIX1,KIF18A,CHAF1B,SF3B4,ABCF1,CENPW,ATAD5,FBL,LSG1,TRAIP,HJURP,ETV4,MCM2,MCM3,MCM4,MCM5,MCM6,MCM7,NOL10,ACTL6A,MND1,MCM10,RRM1,RRM2,WDR76,EZH2,LIN9,TRIM59,CDC7,CDC45,FANCD2,TUBA1B,WDR75,NDC80,XPO5,NIP7,FEN1,RBM14,TOMM40,TACC3,FHL1,SNHG3,PIF1,RBM38,FOXM1,CARM1,DCAF15,TTF2,MYBBP1A,NOP56,DCUN1D5,TRA2B,NOP16,RNASEH2A,BZW2,NACC1,DHX37,DTL,TUBB,BEND3,GINS4,BIRC5,NBEA,DEPDC1,PDCD2L,MSH2,STIL,LYAR,CCDC…
Coexpression Atlas	GSM791143_500	alpha beta T cells, preT.DN3-4.Th, Lin-/lo CD25int CD44- CD28+, Thymus, avg-3	Immgen.org, GSE15907	2.101e-149	8.012e-146	2.003e-146	1.767e-145	178	397	BRIX1,NUSAP1,KIF18A,CHAF1B,BRIP1,ATAD5,SPC25,MCM2,MCM3,MCM4,MCM5,MCM6,MCM7,ACTL6A,MCM10,RRM1,RRM2,WDR76,EZH2,CDC7,CDC45,FANCD2,FANCB,HIST1H2BH,MKI67,TACC3,RAD54L,FOXM1,BZW2,DTL,SMPD4,BIRC5,DEPDC1,STIL,SMC2,ATAD2,SKP2,SPAG5,SPC24,RAD51AP1,NOP58,RUVBL1,ASF1B,PSMG1,C1orf112,CENPI,TPX2,UHRF1,PRR11,CLSPN,SNRPD1,CDCA5,FIGNL1,GEN1,PLK4,MYBL2,CENPN,MCM8,CASC4,PBK,SRM,NASP,CENPK,BLM,AURKA,RTKN2,NEK2,NCAPG…
Coexpression Atlas	GSM399397_500	alpha beta T cells, T.DPbl.Th, 4+ 8+ TCR-/lo FSChi, Thymus, avg-3	Immgen.org, GSE15907	6.466e-149	2.465e-145	4.931e-146	4.351e-145	178	399	NUSAP1,KIF18A,BRIP1,ATAD5,HJURP,SPC25,MCM3,MCM5,MCM7,MCM10,RRM1,RRM2,WDR76,EZH2,DSN1,LIN9,TRIM59,CDC7,CDC45,FANCD2,HIST1H2AL,HIST1H2BH,NDC80,MKI67,TACC3,PIF1,RAD54L,FOXM1,TTF2,GTSE1,DTL,BIRC5,DEPDC1,STIL,SMC2,ATAD2,SPAG5,SPC24,RAD51AP1,CEP72,ASF1B,C1orf112,CENPI,TPX2,RACGAP1,UHRF1,PRR11,CLSPN,TDP1,POLQ,CDCA5,FIGNL1,GEN1,DEPDC1B,PLK4,CENPN,PBK,CENPK,BLM,AURKA,RTKN2,NEK2,NCAPG,BRCA1,BRCA2,DBF4,SUV3…
Coexpression Atlas	GSM538358_500	B cells, proB.FrBC.FL, CD19+ IgM- CD43+ CD24+ AA4.1+ CD45R+, Fetal Liver, avg-3	Immgen.org, GSE15907	7.67e-146	2.925e-142	4.874e-143	4.301e-142	176	400	BRIX1,NUSAP1,KIF18A,CHAF1B,BRIP1,CENPW,ATAD5,SPC25,MCM2,MCM3,MCM5,MCM6,MCM7,MCM10,RRM1,RRM2,WDR76,EZH2,CDC45,FANCD2,HIST1H2AL,HIST1H2BH,NDC80,FEN1,MKI67,TACC3,RAD54L,FOXM1,GTSE1,DTL,BIRC5,DEPDC1,STIL,LYAR,SMC2,SKP2,SPAG5,SPC24,RAD51AP1,IGF2BP3,ASF1B,C1orf112,FAM72A,CENPI,TPX2,UHRF1,LSM2,PRR11,CLSPN,POLQ,SNRPA1,CDCA5,FIGNL1,GEN1,DEPDC1B,PLK4,MYBL2,CENPN,PBK,NASP,CENPK,BLM,AURKA,NEK2,NCAPG,BRCA1,DB…
Coexpression Atlas	GSM538357_500	B cells, proB.FrA.FL, CD19- IgM- CD43+ CD24intermediate CD45R+ AA4.1+ CD, Fetal Liver, avg-1	Immgen.org, GSE15907	8.583e-141	3.273e-137	4.675e-138	4.125e-137	176	422	BRIX1,NUSAP1,KIF18A,CHAF1B,BRIP1,ATAD5,SPC25,MCM2,MCM3,MCM5,MCM6,MCM7,MCM10,RRM1,RRM2,WDR76,EZH2,DSN1,TRIM59,CDC7,CDC45,FANCD2,CEP78,NDC80,FEN1,MKI67,TACC3,RAD54L,FOXM1,DTL,BIRC5,DEPDC1,STIL,SMC2,SKP2,SPAG5,SPC24,NOP58,IGF2BP3,ASF1B,C1orf112,FAM72A,CENPI,TPX2,UHRF1,PRR11,CLSPN,POLQ,CDCA5,FIGNL1,GEN1,DEPDC1B,PLK4,CENPN,MCM8,PBK,NASP,CENPK,NUP205,BLM,AURKA,NEK2,NCAPG,BRCA1,BRCA2,DBF4,BUB1,BUB1B,TIM…
Coexpression Atlas	GSM538387_500	alpha beta T cells, T.8Eff.Sp.OT1.d5.VSVOva, CD8+ CD45.1+, Spleen, avg-3	Immgen.org, GSE15907	2.392e-139	9.122e-136	1.14e-136	1.006e-135	173	410	NUSAP1,KIF18A,CHAF1B,BRIP1,ATAD5,SPC25,MCM2,MCM3,MCM4,MCM5,MCM6,MCM7,MCM10,RRM1,RRM2,WDR76,EZH2,DSN1,CDC7,CDC45,FANCD2,FANCB,HIST1H2AL,HIST1H2BH,NDC80,FEN1,MKI67,TACC3,RAD54L,FOXM1,DTL,BIRC5,DEPDC1,STIL,SMC2,ATAD2,SPAG5,RAD51AP1,ASF1B,CENPI,TPX2,RACGAP1,UHRF1,MTBP,PRR11,CLSPN,POLQ,CDCA5,FIGNL1,GEN1,DEPDC1B,PLK4,MYBL2,CENPN,GARS,PBK,NASP,CENPK,BLM,AURKA,NEK2,NCAPG,BRCA1,BRCA2,DBF4,BUB1,BUB1B,DNAJC…
Coexpression Atlas	GSM791149_500	alpha beta T cells, preT.DN3B.Th, Lin-/lo CD25hi CD44- CD28+, Thymus, avg-3	Immgen.org, GSE15907	2.615e-137	9.97e-134	1.108e-134	9.774e-134	172	413	NUSAP1,CHAF1B,BRIP1,ATAD5,SPC25,MCM2,MCM3,MCM5,MCM6,MCM7,ACTL6A,MCM10,RRM1,RRM2,WDR76,CDC45,FANCD2,HIST1H2BH,FEN1,MKI67,TOMM40,TACC3,RAD54L,FOXM1,MYBBP1A,BZW2,DTL,SMPD4,BIRC5,STIL,SKP2,SPAG5,SPC24,NOP58,RUVBL1,ASF1B,PSMG1,CHTF18,C1orf112,CENPI,TPX2,UHRF1,PRR11,CLSPN,SNRPC,SNRPD1,CDCA5,FIGNL1,PLK4,MYBL2,CENPN,RRP1B,GART,PBK,SRM,NASP,CENPK,RCC2,BLM,AURKA,NEK2,NCAPG,BRCA1,SUV39H1,BUB1,BUB1B,NME1,KIF…
Coexpression Atlas	GSM538355_500	B cells, proB.FrA.FL, CD19- IgM- CD43+ CD24intermediate AA4.1+ CD45R+ CD, Fetal Liver, avg-2	Immgen.org, GSE15907	1.047e-136	3.992e-133	3.992e-134	3.522e-133	173	422	BRIX1,NUSAP1,KIF18A,CHAF1B,BRIP1,CENPW,ATAD5,SPC25,MCM2,MCM3,MCM5,MCM6,MCM7,MCM10,RRM1,RRM2,WDR76,EZH2,DSN1,TRIM59,CDC7,CDC45,FANCD2,NDC80,MKI67,TACC3,RAD54L,FOXM1,BZW2,DTL,BIRC5,DEPDC1,STIL,LYAR,SMC2,SPAG5,SPC24,RAD51AP1,NOP58,IGF2BP3,C1orf112,FAM72A,CENPI,TPX2,UHRF1,PRR11,CLSPN,POLQ,CDCA5,FIGNL1,GEN1,DEPDC1B,PLK4,CENPN,MCM8,PBK,NASP,CENPK,BLM,AURKA,NEK2,NCAPG,BRCA1,BRCA2,DBF4,BUB1,BUB1B,KIF2C,U…
Computational	M5468 MODULE_54	Cell cycle (expression cluster).	MSigDb: C4 - CM: Cancer Modules (v6.0)	3.562e-118	2.404e-115	2.404e-115	1.705e-114	144	262	NUSAP1,CHAF1B,HJURP,MCM2,MCM3,MCM4,MCM5,MCM6,MCM7,RRM1,RRM2,CDC7,CDC45,NDC80,FEN1,MKI67,TACC3,RAD54L,FOXM1,BEND3,BIRC5,DEPDC1,MSH2,SMC2,ATAD2,SPAG5,UBE2T,CCT5,NUDT1,ASF1B,TPX2,GINS2,PRR11,POLQ,SNRPA1,SNRPB,SNRPC,CDCA5,SNRPF,DEPDC1B,PLK4,MYBL2,MTHFD2,PBK,SRPK1,BLM,AURKA,NEK2,APEX2,BUB1,BUB1B,BYSL,UBE2S,TIMELESS,NME1,PSRC1,KIF2C,UBE2C,TOPBP1,WDR5,LMNB2,NCAPH,PHF5A,CCNA2,ZWINT,CCNB1,PKMYT1,CCNF,CCT6…
Computational	M7419 GNF2_CCNA2	Neighborhood of CCNA2	MSigDb: C4 - CGN: Cancer Gene Neighborhood (v6.0)	1.241e-80	8.379e-78	4.189e-78	2.971e-77	65	68	NUSAP1,HJURP,MCM2,MCM3,MCM4,MCM6,MCM7,RRM1,RRM2,EZH2,NDC80,FEN1,MKI67,FOXM1,BIRC5,SMC2,RAD51AP1,ASF1B,TPX2,RACGAP1,GINS2,AURKA,NCAPG,BUB1B,UBE2C,PRC1,CCNA2,ZWINT,CCNB2,H2AFX,TMPO,CDK1,CDC20,TOP2A,PCNA,AURKB,CENPA,CENPE,CENPF,HMGB2,HMMR,TTK,TYMS,CKS1B,CKS2,ASPM,PLK1,PRIM1,KIF18B,ESPL1,CDCA3,DLGAP5,KIF4A,MELK,NCAPD2,KIF14,KIF11,SMC4,RFC3,RFC4,CDCA8,E2F8,KIF20A,FANCI,SHCBP1
Computational	M17279 GNF2_PCNA	Neighborhood of PCNA	MSigDb: C4 - CGN: Cancer Gene Neighborhood (v6.0)	1.059e-75	7.148e-73	2.383e-73	1.69e-72	63	68	NUSAP1,MCM2,MCM3,MCM4,MCM5,MCM6,MCM7,RRM1,RRM2,NDC80,FEN1,MKI67,RAD54L,FOXM1,DTL,BIRC5,MSH2,SMC2,RAD51AP1,TPX2,RACGAP1,GINS2,PLK4,MYBL2,AURKA,BUB1B,DNAJC9,PRC1,CCNA2,ZWINT,PA2G4,CCNB2,H2AFX,TMPO,CDK1,CDC20,TOP2A,PCNA,CENPE,CENPF,HMGB2,HMMR,TTK,HNRNPAB,TYMS,CKS2,ASPM,VRK1,POLE2,PRIM1,KIF18B,ESPL1,DLGAP5,MELK,GINS1,KIF15,SLBP,KIF11,SMC4,RFC4,CDCA8,FANCI,SHCBP1
Computational	M13566 GNF2_CDC2	Neighborhood of CDC2	MSigDb: C4 - CGN: Cancer Gene Neighborhood (v6.0)	8.389e-73	5.662e-70	1.416e-70	1.004e-69	59	62	NUSAP1,HJURP,MCM2,RRM1,RRM2,EZH2,NDC80,FEN1,MKI67,FOXM1,BIRC5,SMC2,TPX2,GINS2,PLK4,MYBL2,AURKA,NCAPG,DNAJC9,UBE2S,UBE2C,PRC1,CCNA2,ZWINT,CCNF,CCNB2,H2AFX,TMPO,CDK1,CDC20,TOP2A,PCNA,PTTG1,CENPE,CENPF,HMGB2,HMMR,TTK,TYMS,CKS2,ASPM,PRIM1,KIF18B,CDCA3,DLGAP5,KIF4A,MELK,KIF15,KIF11,KIFC1,SMC4,RFC3,RFC4,CDCA8,E2F8,KIF20A,FANCI,SHCBP1,CKAP2
Computational	M11786 GNF2_RRM1	Neighborhood of RRM1	MSigDb: C4 - CGN: Cancer Gene Neighborhood (v6.0)	4.99e-72	3.368e-69	6.737e-70	4.778e-69	69	88	NUSAP1,MCM2,MCM3,MCM4,MCM5,MCM6,MCM7,RRM1,RRM2,NDC80,FEN1,MKI67,FOXM1,DTL,BIRC5,MSH2,SMC2,RAD51AP1,RACGAP1,GINS2,SNRPD1,PLK4,NASP,SSRP1,AURKA,BUB1B,UBE2C,PRC1,CCNA2,ZWINT,CCT6A,PA2G4,CCNB2,H2AFX,TMPO,CDK1,CDC20,TOP2A,PCNA,AURKB,CENPE,CENPF,HMGB2,HMMR,TTK,HNRNPAB,TYMS,CKS2,CENPM,NUP37,ASPM,VRK1,PRIM1,KIF18B,DLGAP5,MELK,GINS1,KIF14,SLBP,KIF11,RAN,DTYMK,SMC4,RFC3,RFC4,CDCA8,E2F8,FANCI,SHCBP1
Computational	M10439 GNF2_CENPF	Neighborhood of CENPF	MSigDb: C4 - CGN: Cancer Gene Neighborhood (v6.0)	2.477e-70	1.672e-67	2.787e-68	1.977e-67	58	62	NUSAP1,HJURP,MCM2,MCM3,MCM7,MCM10,RRM1,RRM2,NDC80,FEN1,MKI67,FOXM1,BIRC5,SMC2,TPX2,GINS2,PLK4,MYBL2,AURKA,DNAJC9,UBE2S,UBE2C,PRC1,CCNA2,ZWINT,CCNF,CCNB2,H2AFX,TMPO,CDK1,CDC20,TOP2A,PCNA,PTTG1,CENPE,CENPF,HMGB2,HMMR,TTK,TYMS,CKS2,ASPM,PRIM1,KIF18B,CDCA3,DLGAP5,KIF4A,KIF15,KIF11,KIFC1,DTYMK,SMC4,RFC4,CDCA8,E2F8,FANCI,SHCBP1,CKAP2
Computational	M15766 GNF2_CCNB2	Neighborhood of CCNB2	MSigDb: C4 - CGN: Cancer Gene Neighborhood (v6.0)	2.6e-66	1.755e-63	2.507e-64	1.778e-63	54	57	NUSAP1,MCM2,MCM4,RRM1,RRM2,NDC80,FEN1,FOXM1,BIRC5,SMC2,SPAG5,TPX2,RACGAP1,PLK4,PBK,AURKA,BUB1,BUB1B,UBE2S,KIF2C,UBE2C,PRC1,NCAPH,CCNA2,ZWINT,CCNB2,H2AFX,CDK1,CDC20,TOP2A,PCNA,PTTG1,CENPE,CENPF,OIP5,HMGB2,HMMR,TTK,TYMS,CKS2,ASPM,KIF18B,ESPL1,CDCA3,DLGAP5,KIF4A,MELK,KIF11,SMC4,RFC4,CDCA8,KIF20A,SHCBP1,CKAP2
Computational	M17151 GNF2_CDC20	Neighborhood of CDC20	MSigDb: C4 - CGN: Cancer Gene Neighborhood (v6.0)	5.122e-65	3.458e-62	4.322e-63	3.065e-62	53	56	NUSAP1,MCM2,MCM4,RRM1,RRM2,NDC80,MKI67,FOXM1,BIRC5,SMC2,SPAG5,TPX2,RACGAP1,PLK4,AURKA,BUB1,BUB1B,UBE2S,KIF2C,UBE2C,PRC1,NCAPH,CCNA2,ZWINT,CCNB2,H2AFX,CDK1,CDC20,TOP2A,PCNA,AURKB,PTTG1,CENPE,CENPF,HMMR,TTK,TYMS,CKS1B,CKS2,ASPM,PLK1,KIF18B,ESPL1,CDCA3,DLGAP5,KIF4A,MELK,KIF11,RAN,SMC4,CDCA8,KIF20A,SHCBP1
Computational	M12856 GNF2_SMC4L1	Neighborhood of SMC4L1	MSigDb: C4 - CGN: Cancer Gene Neighborhood (v6.0)	4.86e-60	3.281e-57	3.645e-58	2.586e-57	61	84	NUSAP1,MCM2,MCM3,MCM4,MCM5,MCM7,RRM1,NDC80,FEN1,FOXM1,DTL,MSH2,SMC2,RAD51AP1,RACGAP1,GINS2,SNRPD1,PLK4,NASP,SSRP1,AURKA,BUB1B,DNAJC9,PRC1,CCNA2,ZWINT,CCNB2,H2AFX,TMPO,CDK1,CDC20,TOP2A,PCNA,CENPF,HMGB2,HMMR,TTK,HNRNPAB,TYMS,CKS2,ASPM,VRK1,POLE2,PRIM1,KIF18B,DLGAP5,GINS1,FBXO5,DKC1,SLBP,KIF11,ZWILCH,DTYMK,SMC4,RFC3,RFC4,CDCA8,E2F8,FANCI,SHCBP1,CKAP2
Computational	M17594 GNF2_MCM4	Neighborhood of MCM4	MSigDb: C4 - CGN: Cancer Gene Neighborhood (v6.0)	9.449e-59	6.378e-56	6.378e-57	4.524e-56	49	53	MCM2,MCM3,MCM4,MCM5,MCM6,MCM7,RRM1,RRM2,NDC80,FEN1,FOXM1,RAD51AP1,ASF1B,RACGAP1,GINS2,NASP,AURKA,BUB1,BUB1B,UBE2C,CCNA2,ZWINT,PA2G4,CCNB2,CDC20,TOP2A,PCNA,AURKB,HELLS,HMMR,TTK,TYMS,CKS2,CENPM,ASPM,POLD1,KIF18B,ESPL1,MELK,GINS1,KIF14,KIF11,SMC4,RFC3,RFC4,CDCA8,LMNB1,FANCI,MAD2L1
MicroRNA	hsa-miR-24:miRTarbase	hsa-miR-24:miRTarbase	miRTarbase	1.548e-06	0.004954	0.004954	0.04285	10	38	FEN1,BRCA1,CCNA2,H2AFX,CDK1,PCNA,AURKB,CHEK1,POLD1,E2F2
MicroRNA	hsa-miR-503:miRTarbase	hsa-miR-503:miRTarbase	miRTarbase	8.66e-06	0.02771	0.01386	0.1198	6	14	CCNE1,CCNF,CCNE2,CDC25A,CHEK1,ANLN
MicroRNA	hsa-miR-26a:miRTarbase	hsa-miR-26a:miRTarbase	miRTarbase	2.639e-05	0.08443	0.02814	0.2434	8	32	EZH2,CPEB3,CPEB4,CCNE1,CCNE2,CDC6,HMGA1,HMGA2
MicroRNA	hsa-miR-192:miRTarbase	hsa-miR-192:miRTarbase	miRTarbase	3.83e-05	0.1226	0.03064	0.265	7	25	MCM10,CDC7,DTL,RACGAP1,LMNB2,KIF20B,MAD2L1
Drug	C015559	trimellitic anhydride	CTD	3.367e-164	9.968e-160	9.968e-160	1.084e-158	343	1862	NUSAP1,KIF18A,CHAF1B,ABCF1,BRIP1,CENPW,ATAD5,MARS,TRAIP,LRRK2,SPC25,ETV4,MCM2,MCM3,MCM4,MCM5,MCM6,MCM7,LRRC59,ACTL6A,MCM10,RRM1,RRM2,EZH2,DSN1,F8,CCDC85A,CDC7,FANCA,FANCD2,FZD4,XPO5,FEN1,MKI67,RBM14,TOMM40,TACC3,MMP12,PPIH,SNHG3,GPRASP2,RAD54L,FOXM1,TTF2,MYBBP1A,SFPQ,BZW2,GTSE1,DTL,BIRC5,NBEA,STIL,LYAR,SMC2,THOC3,ATAD2,SKP2,SPAG5,SPC24,RAD51AP1,SLC6A13,IGF2BP3,RUVBL1,UBE2T,CCT5,NUDT1,ASF1B,CHTF18…
Drug	D003375	Coumestrol	CTD	5.679e-132	1.681e-127	8.405e-128	9.139e-127	304	1790	NUSAP1,KIF18A,CHAF1B,ABAT,ABCF1,CENPW,NUP85,MAZ,HJURP,SPC25,MCM2,MCM3,MCM4,MCM5,MCM6,MCM7,MCM10,DNAJB9,RRM1,RRM2,WDR76,EZH2,DSN1,TRIM59,CDC7,FANCA,FANCD2,FANCG,HIST1H2BH,CEP78,SERINC1,FEN1,MKI67,FAM149B1,TACC3,FHL1,PIF1,RAD54L,FOXM1,DCAF15,TTF2,RAE1,TRA2B,RNASEH2A,MYO19,GTSE1,TUBB,GINS4,BIRC5,NBEA,DEPDC1,MSH2,STIL,LYAR,SMC2,ATAD2,SKP2,SPAG5,SPC24,RAD51AP1,UBE2T,NUDT1,ASF1B,C1orf112,CENPI,TPX2,YPE…
Drug	C029497	2,3-bis(3'-hydroxybenzyl)butyrolactone	CTD	8.105e-129	2.399e-124	7.998e-125	8.696e-124	229	959	NUSAP1,KIF18A,CHAF1B,ABCF1,CENPW,MAZ,HJURP,SPC25,MCM2,MCM3,MCM4,MCM5,MCM6,MCM7,MCM10,DNAJB9,RRM1,RRM2,WDR76,EZH2,DSN1,TRIM59,CDC7,FANCD2,FANCG,HIST1H2BH,CEP78,FEN1,MKI67,FAM149B1,TACC3,RAD54L,FOXM1,DCAF15,RNASEH2A,GTSE1,TUBB,GINS4,BIRC5,NBEA,DEPDC1,STIL,SMC2,ATAD2,SKP2,SPAG5,SPC24,RAD51AP1,UBE2T,NUDT1,ASF1B,C1orf112,CENPI,TPX2,YPEL5,RACGAP1,UHRF1,GINS2,LSM2,TDP1,SNRPA1,SNRPB,CDCA5,FIGNL1,PLK4,MYB…
Drug	C488369	dasatinib	CTD	6.125e-109	1.813e-104	4.533e-105	4.929e-104	156	472	NUSAP1,CENPW,ATAD5,HJURP,MCM6,MCM7,MND1,MCM10,RRM1,RRM2,WDR76,EZH2,DSN1,CDC7,FANCA,FANCD2,HIST1H2BH,NDC80,FEN1,MKI67,TACC3,FHL1,FOXM1,RNASEH2A,CALCOCO1,DTL,GINS4,BIRC5,DEPDC1,MSH2,STIL,SMC2,ATAD2,UBE2T,ASF1B,C1orf112,CENPI,TPX2,RACGAP1,UHRF1,HAPLN3,GINS2,MTBP,PRR11,CLSPN,TDP1,POLQ,CDCA5,FIGNL1,GEN1,DEPDC1B,PLK4,MYBL2,CENPN,MCM8,PBK,CENPK,AURKA,DLEU2,NCAPG,BRCA1,BRCA2,BUB1,BUB1B,UBE2S,TIMELESS,KIF…
Drug	D000069439	Dasatinib	CTD	1.285e-108	3.803e-104	7.606e-105	8.269e-104	156	474	NUSAP1,CENPW,ATAD5,HJURP,MCM6,MCM7,MND1,MCM10,RRM1,RRM2,WDR76,EZH2,DSN1,CDC7,FANCA,FANCD2,HIST1H2BH,NDC80,FEN1,MKI67,TACC3,FHL1,FOXM1,RNASEH2A,CALCOCO1,DTL,GINS4,BIRC5,DEPDC1,MSH2,STIL,SMC2,ATAD2,UBE2T,ASF1B,C1orf112,CENPI,TPX2,RACGAP1,UHRF1,HAPLN3,GINS2,MTBP,PRR11,CLSPN,TDP1,POLQ,CDCA5,FIGNL1,GEN1,DEPDC1B,PLK4,MYBL2,CENPN,MCM8,PBK,CENPK,AURKA,DLEU2,NCAPG,BRCA1,BRCA2,BUB1,BUB1B,UBE2S,TIMELESS,KIF…
Drug	C500026	palbociclib	CTD	1.118e-104	3.309e-100	5.515e-101	5.996e-100	103	172	NUSAP1,HJURP,SPC25,MCM7,MCM10,RRM1,RRM2,EZH2,CDC45,NDC80,FEN1,MKI67,FOXM1,TUBB,BIRC5,STIL,SPC24,RAD51AP1,UBE2T,ASF1B,TPX2,RACGAP1,UHRF1,GINS2,PRR11,CDCA5,DEPDC1B,PBK,AURKA,NEK2,NCAPG,BUB1,PSRC1,KIF2C,UBE2C,PRC1,CCNA2,ZWINT,CCNB1,CCNE1,CCNF,TK1,CCNB2,CCNE2,EXO1,CKAP2L,H2AFX,TMPO,CDK1,CDC20,CDC25A,CDC25C,TOP2A,PCNA,CDK2,AURKB,CDKN3,PTTG1,CENPA,CENPE,CENPF,OIP5,HMGB2,HMMR,POLA2,TTK,TYMS,CENPM,ANLN,G…
Drug	D008154	Lucanthone	CTD	2.746e-102	8.13e-98	1.161e-98	1.263e-97	110	212	NUSAP1,HJURP,SPC25,MND1,MCM10,RRM2,WDR76,EZH2,LIN9,HIST1H2AJ,HIST1H2AL,HIST1H2BH,NDC80,HIST1H3B,MKI67,FOXM1,DTL,BIRC5,DEPDC1,ATAD2,SPAG5,RAD51AP1,UBE2T,FAM72A,CENPI,TPX2,RACGAP1,PRR11,DEPDC1B,PLK4,MYBL2,MCM8,PBK,CENPK,BLM,AURKA,DLEU2,NEK2,C5orf34,NCAPG,BRCA1,BRCA2,BUB1,BUB1B,KIF2C,HIST1H3F,PRC1,NCAPH,CCNA2,ZWINT,CCNB1,CCNB2,HIST1H1B,EXO1,CKAP2L,KIF4B,CDK1,CDC6,CDC20,CDC25C,TOP2A,AURKB,CDKN3,CENPA…
Drug	C558013	NSC 689534	CTD	2.505e-57	7.414e-53	9.268e-54	1.008e-52	196	1571	NUSAP1,HJURP,SPC25,ETV4,PTGR2,MCM2,MCM3,MCM4,MCM5,MCM6,MCM7,MND1,MCM10,DNAJB9,RRM1,RRM2,WDR76,CDC7,CDC45,FANCA,FZD4,TUBA1B,FANCG,MFAP2,HIST1H2BH,CEP78,NDC80,FEN1,AIG1,MKI67,TACC3,RAD54L,FOXM1,MYBBP1A,NOP56,RNASEH2A,C11orf54,NACC1,GTSE1,DTL,CPEB3,BIRC5,DEPDC1,MSH2,LYAR,ATAD2,SKP2,RHOB,RAD51AP1,RUVBL1,UBE2T,ASF1B,CGRRF1,CPEB4,TPX2,YPEL5,RACGAP1,UHRF1,GINS2,FAM189B,SNRPA1,SNRPD1,CPSF3,KDM1A,WDR4,HNR…
Drug	C059765	amphotericin B, deoxycholate drug combination	CTD	4.794e-57	1.419e-52	1.577e-53	1.714e-52	97	365	NUSAP1,CHAF1B,MCM2,MCM3,MCM4,MCM5,MCM6,RRM2,TRIM59,CDC7,NDC80,MKI67,TACC3,RAD54L,BZW2,DTL,BIRC5,STIL,SMC2,RAD51AP1,UBE2T,CHTF18,TPX2,RACGAP1,UHRF1,CDCA5,FIGNL1,PLK4,CENPN,MTHFD2,BLM,AURKA,NCAPG,BRCA1,BUB1,TIMELESS,KIF2C,TCF19,UBE2C,TOPBP1,PRC1,NCAPH,CCNA2,CCNB1,CCNF,CCNB2,CCNE2,EXO1,CDK1,CDC6,CDC20,SKA1,TOP2A,PCNA,AURKB,HELLS,NRM,GTPBP4,CENPF,HMGB2,CHEK1,TRIP13,CKS1B,CLU,ANLN,ASPM,PLK1,KIF23,POLA…
Drug	5027_DN	Etoposide [33419-42-0]; Down 200; 6.8uM; MCF7; HT_HG-U133A	Broad Institute CMAP	1.5e-56	4.442e-52	4.442e-53	4.829e-52	72	180	NUSAP1,KIF18A,HJURP,SPC25,WDR76,NDC80,NME5,MKI67,TACC3,TRA2B,GTSE1,BIRC5,STIL,SPAG5,CEP72,TRABD,CENPI,TPX2,RACGAP1,AURKA,NCAPG,DBF4,BUB1,VAMP2,BUB1B,PSRC1,KIF2C,TCF3,UBE2C,PRC1,NCAPH,CCNA2,CCNB1,CCNF,CDC25A,CDC25C,TOP2A,AURKB,CDKN3,PTTG1,CENPA,CENPE,CENPF,HMGB2,HMMR,TTK,ASPM,GPSM2,PLK1,KIF23,XRCC3,KIF20B,ESPL1,CDCA3,NDE1,ERCC6L,DLGAP5,ARHGAP11A,KIF15,CDADC1,KIF14,KIF11,DNMT3B,TROAP,SMC4,ECT2,CDCA…
Disease	C0376628	Chromosome Breakage	DisGeNET Curated	5.654e-16	2.803e-12	2.803e-12	2.547e-11	17	32	FANCA,FANCD2,FANCE,FANCB,FANCG,UBE2T,BLM,BRCA1,BRCA2,H2AFX,HELLS,POLA1,XRCC2,DDX11,DNMT3B,RAD51,FANCI
Disease	C0015625	Fanconi Anemia	DisGeNET Curated	3.423e-13	1.697e-09	5.756e-10	5.23e-09	42	285	BRIP1,ATAD5,MCM4,FANCA,FANCD2,FANCE,FANCB,FANCG,MSH2,RUVBL1,UBE2T,SMARCA4,UHRF1,GINS2,BLM,BRCA1,BRCA2,NME1,CCNB1,CCNE1,MSH6,EXO1,H2AFX,PRKN,CDK1,PCNA,TP73,CHEK1,TTK,POLD1,DCLRE1B,XRCC2,XRCC3,PRKDC,RAD18,DDX11,DNA2,RAD51,E2F1,STMN1,PALB2,FANCI
Disease	C1859424	Increased chromosomal breakage	DisGeNET Curated	3.483e-13	1.727e-09	5.756e-10	5.23e-09	14	27	FANCA,FANCD2,FANCE,FANCB,FANCG,UBE2T,BLM,BRCA2,HELLS,POLA1,XRCC2,DNMT3B,RAD51,FANCI
Disease	C0035335	Retinoblastoma	DisGeNET Curated	1.024e-12	5.076e-09	1.269e-09	1.153e-08	60	539	MCM2,EZH2,LIN9,TRIM59,FANCB,MKI67,FOXM1,BIRC5,MSH2,SKP2,KHSRP,PSMG1,NXT1,SMARCA4,UHRF1,MYBL2,NUP205,BRCA1,BRCA2,SUV39H1,NME1,UBE2C,TERT,TFDP1,CCNB1,CCNE1,CHEK2,EXO1,H2AFX,CDK1,CDC25A,CDC25B,CDC25C,PCNA,CDK2,TP73,HDGF,HELLS,NOLC1,CDKN3,RCC1,CHEK1,ABCB1,TYMS,RECQL4,PLK1,WDR77,VRK1,POLD1,FBXO8,KIF14,DNMT1,KPNA2,RBL1,E2F1,E2F3,E2F4,STMN1,HMGA2,MAD2L1
Disease	C0424688	Small head	DisGeNET Curated	5.333e-12	2.644e-08	5.288e-09	4.805e-08	47	375	SF3B4,ACADSB,TRAIP,MCM4,FANCA,FANCD2,FANCE,FANCB,FANCG,ALDH6A1,MOCS2,STIL,UBE2T,SMARCA4,SNRPB,PLK4,BLM,BRCA2,BUB1,BUB1B,TERT,CDC6,HCFC1,CENPE,CENPF,PEX12,HMGB3,TUBG1,EFTUD2,POC1A,XRCC2,PRKDC,ZBTB16,NDE1,NSUN2,DDX11,PYCR1,DKC1,KIF14,DNA2,KIF11,RAD51,RBM28,RFC2,YARS2,FANCI,ALG3
Disease	C3469521	FANCONI ANEMIA, COMPLEMENTATION GROUP A (disorder)	DisGeNET Curated	1.008e-11	4.996e-08	8.327e-09	7.566e-08	37	252	BRIP1,ATAD5,FANCA,FANCD2,FANCE,FANCB,FANCG,MSH2,UBE2T,SMARCA4,UHRF1,GINS2,BLM,BRCA1,BRCA2,NME1,CCNB1,MSH6,EXO1,H2AFX,PRKN,CDK1,PCNA,TP73,CHEK1,TTK,POLD1,DCLRE1B,XRCC2,RAD18,DDX11,DNA2,RAD51,E2F1,STMN1,PALB2,FANCI
Disease	C3539878	Triple Negative Breast Neoplasms	DisGeNET BeFree	1.35e-11	6.693e-08	9.562e-09	8.688e-08	61	588	NUSAP1,ATAD5,MAZ,RRM1,EZH2,CDC7,FANCA,FANCD2,FOXM1,BIRC5,SKP2,SPAG5,SMARCA4,MTBP,KDM1A,CENPK,NEK2,BRCA1,BRCA2,SUV39H1,KDM2B,YBX1,TFRC,PEBP1,CHEK2,H2AFX,PRKN,CDK1,CDC20,CDC25B,TOP2A,PCNA,TP73,CENPA,CENPE,NUP62,CHEK1,HMGA1,PFN1,TTK,ABCB1,KL,CLU,ASPM,PSMC3IP,PLK1,PMAIP1,XPO1,XRCC2,XRCC3,PTBP1,TIPIN,KIF14,ABCC10,DNMT1,RAD51,E2F1,PALB2,HMGA2,FANCI,NBR1
Disease	C2749463	Radial aplasia/hypoplasia	DisGeNET Curated	2.652e-11	1.315e-07	1.643e-08	1.493e-07	13	29	FANCA,FANCD2,FANCE,FANCB,FANCG,UBE2T,BRCA2,RECQL4,PITX1,XRCC2,ZBTB16,RAD51,FANCI
Disease	C0272027	Pyridoxine-responsive sideroblastic anemia	DisGeNET Curated	1.686e-10	8.361e-07	9.291e-08	8.441e-07	10	17	FANCA,FANCD2,FANCE,FANCB,FANCG,UBE2T,BRCA2,XRCC2,RAD51,FANCI
Disease	C0025958	Microcephaly	DisGeNET Curated	4.358e-10	2.16e-06	2.16e-07	1.963e-06	26	152	TRAIP,FZD4,TUBB,STIL,PLK4,CENPJ,BRCA1,BUB1B,CDC6,SLC25A19,CENPF,CHEK1,TUBG1,EFTUD2,ASPM,PLK1,VRK1,POLE,TSEN54,NDE1,NSUN2,DDX11,KIF14,WDR62,KIF11,EXOSC3

## Sheet: Supplementary Table 8
Category	ID	Name	Source	p-value	q-value Bonferroni	q-value FDR B&H	q-value FDR B&Y	Hit Count in Query List	Hit Count in Genome	Hit in Query List
GO: Molecular Function	GO:0005085	guanyl-nucleotide exchange factor activity		1.036e-06	0.001372	0.001372	0.01066	28	306	RASGRP4,DENND4A,RCBTB2,RASGRP3,FGF2,PREX1,ARHGEF6,ANGPT1,P2RY12,DOCK10,PREX2,RAPGEF2,FYN,DOCK4,DOCK11,TAGAP,ARHGEF17,ELMO1,JAK1,RGL1,DENND5A,HERC1,DOCK2,RASGRF2,SH2D3C,TEK,AKAP13,RASGRP2
GO: Molecular Function	GO:0005088	Ras guanyl-nucleotide exchange factor activity		2.691e-05	0.03566	0.01783	0.1385	21	232	RASGRP4,DENND4A,RCBTB2,RASGRP3,FGF2,PREX1,ARHGEF6,ANGPT1,DOCK10,PREX2,RAPGEF2,FYN,DOCK11,ARHGEF17,JAK1,RGL1,DENND5A,DOCK2,RASGRF2,TEK,AKAP13
GO: Molecular Function	GO:0016773	phosphotransferase activity, alcohol group as acceptor		0.0001777	0.2354	0.03709	0.288	45	781	CDK17,PNKP,TBRG4,HIPK1,RPS6KB2,LRRK2,CDK14,PIK3CG,PIK3R1,FGF2,FLT4,ADCK5,PPP4C,CSF1R,PRKACB,PRKCB,ATM,PRKG1,COASY,FYN,GAB1,RASSF2,SNRK,STAT5B,JAK1,TTBK2,NEK1,BMPR2,NME2,AKT3,NTRK3,DDR2,SIK3,TEK,PIKFYVE,TGFBR2,TNNI3K,EFNA4,TIE1,PAK3,DGKI,IRAK3,ROCK1,AKAP13,DCLK1
GO: Molecular Function	GO:0016301	kinase activity		0.0001887	0.2501	0.03709	0.288	48	853	CDK17,PNKP,TBRG4,HIPK1,RPS6KB2,LRRK2,CDK14,PIK3CG,PIK3R1,FGF2,FLT4,ADCK5,PPP4C,CSF1R,PRKACB,PRKCB,ATM,PRKG1,COASY,FYN,GAB1,RASSF2,SNRK,STAT5B,JAK1,TTBK2,NEK1,BMPR2,DLG2,NME1,NME2,AKT3,DTYMK,NTRK3,DDR2,SIK3,TEK,PIKFYVE,TGFBR2,TNNI3K,EFNA4,TIE1,PAK3,DGKI,IRAK3,ROCK1,AKAP13,DCLK1
GO: Molecular Function	GO:0004672	protein kinase activity		0.0002068	0.274	0.03709	0.288	39	649	CDK17,TBRG4,HIPK1,RPS6KB2,LRRK2,CDK14,PIK3CG,FGF2,FLT4,ADCK5,PPP4C,CSF1R,PRKACB,PRKCB,ATM,PRKG1,FYN,RASSF2,SNRK,STAT5B,JAK1,TTBK2,NEK1,BMPR2,NME2,AKT3,NTRK3,DDR2,SIK3,TEK,TGFBR2,TNNI3K,EFNA4,TIE1,PAK3,IRAK3,ROCK1,AKAP13,DCLK1
GO: Molecular Function	GO:0032403	protein complex binding		0.0002068	0.2741	0.03709	0.288	57	1071	DOK6,MAP1A,MAP1B,LRRK2,RCSD1,KATNAL1,F2R,ADD1,PIK3R1,MIF,UQCRC1,UTRN,SGIP1,HTR2A,WIPF1,ABI3BP,PPFIA2,APC,CLIC4,ADAM22,FAM83H,PPP1CA,CLIP3,LRRN3,CCDC88A,PPP4C,NCOA1,SMARCD2,CD300LG,ATM,FYN,SPARC,DISC1,GIT2,ITPR1,KAT2B,SYNJ1,SACS,NME1,NME2,MAPRE2,JAM3,KIF22,DOCK2,LCA5,DPYSL2,ADRM1,SYNE1,ECM2,DDR2,ADAMTS5,NR3C1,EDIL3,BCAP31,PAFAH1B1,MACF1,GNB4
GO: Molecular Function	GO:0044877	macromolecular complex binding		0.0002427	0.3216	0.03709	0.288	79	1626	DOK6,ERG,MAP1A,MAP1B,LRRK2,NAA10,RCSD1,KATNAL1,F2R,MEF2A,MEF2C,ADD1,ATXN1,PIK3R1,MIF,UQCRC1,UTRN,FLI1,TSHZ3,SGIP1,HTR2A,WIPF1,ABI3BP,PPFIA2,APC,CLIC4,SIRT7,ADAM22,FAM83H,PPP1CA,SCARF1,CLIP3,LRRN3,CCDC88A,PPP4C,GPIHBP1,NCOA1,PRKCB,SMARCD2,CD300LG,ATM,MBD5,SNRPB,FYN,SNRPD2,SPARC,DISC1,GIT2,RUVBL2,EIF6,STAT5B,ITPR1,KAT2B,SYNJ1,SACS,NME1,NME2,MAPRE2,TAL1,JAM3,KIF22,DOCK2,LCA5,TCF4,DPYSL2,ZEB1,ADRM1,S…
GO: Molecular Function	GO:0044325	ion channel binding		0.0002731	0.3619	0.03709	0.288	13	127	PDE4B,TRPC1,LRRK2,SCN4B,PKD2,FHL1,ANK2,SLC8A1,FYN,KCNB1,KCNAB1,CACNA1C,ABCC9
GO: Molecular Function	GO:0098772	molecular function regulator		0.0002765	0.3663	0.03709	0.288	71	1430	RASGRP4,DENND4A,LRRK2,RCBTB2,HSPBP1,KIDINS220,DLC1,ARHGAP31,PIK3R1,RASGRP3,SCN4B,FGF2,ARHGAP20,MMP16,PREX1,RECK,ARHGEF6,SEC14L1,ANGPT1,P2RY12,RASA3,ADCK5,DOCK10,APC,LRRC4C,PREX2,CARD8,TRIM23,PPP1R16B,PRKCB,PRKG1,RAPGEF2,ATP1B2,FYN,TOR1AIP1,MTMR9,GIPC1,DOCK4,ARHGAP24,STARD8,AUP1,DOCK11,TAGAP,MYO9A,GIT2,ARHGEF17,ZEB2,ELMO1,ITPR1,JAK1,RGL1,KAT2B,KCNA5,KCNAB1,ARHGAP25,DENND5A,HERC1,DOCK2,RASGRF2,ADRM…
GO: Molecular Function	GO:0003735	structural constituent of ribosome		0.0002799	0.3709	0.03709	0.288	18	216	MRPL12,MRPS12,MRPL37,MRPL17,MRPL14,SLC25A39,MRPS24,SLC25A10,MRPS15,MRPS34,MRPL11,MRPS16,MRPL52,MRPL2,MRPS18A,MRPL4,MRPS2,RPL8
GO: Biological Process	GO:0070125	mitochondrial translational elongation		2.879e-11	1.634e-07	1.634e-07	1.507e-06	19	85	MRPL12,MRPS12,MRPL37,TUFM,MRPL17,MRPL14,MRPS26,MRPS24,MRPS15,MRPS34,MRPL38,MRPL11,AURKAIP1,CHCHD1,MRPS16,MRPL52,MRPL2,MRPS18A,MRPL4
GO: Biological Process	GO:0070126	mitochondrial translational termination		3.046e-10	1.729e-06	8.645e-07	7.972e-06	18	86	MRPL12,MRPS12,MRPL37,MRPL17,MRPL14,MRPS26,MRPS24,MRPS15,MRPS34,MRPL38,MRPL11,AURKAIP1,CHCHD1,MRPS16,MRPL52,MRPL2,MRPS18A,MRPL4
GO: Biological Process	GO:0006415	translational termination		4.719e-10	2.679e-06	8.929e-07	8.234e-06	19	99	MRPL12,MRPS12,MRPL37,MRPL17,MRPL14,MRPS26,MRPS24,MRPS15,MRPS34,MRPL38,MRPL11,AURKAIP1,CHCHD1,MRPS16,MRPL52,MRPL2,MRPS18A,MRPL4,EIF5A
GO: Biological Process	GO:0032543	mitochondrial translation		2.232e-09	1.267e-05	3.168e-06	2.921e-05	20	120	MRPL12,MRPS12,MRPL37,TUFM,MRPL17,MRPL14,MRPS26,MRPS24,MRPS15,MRPS34,MRPL38,MRPL11,AURKAIP1,CHCHD1,MRPS16,MRPL52,MRPL2,MRPS18A,MRPL4,MRPS2
GO: Biological Process	GO:0006414	translational elongation		1.587e-08	9.01e-05	1.755e-05	0.0001619	20	134	MRPL12,MRPS12,MRPL37,TUFM,MRPL17,MRPL14,MRPS26,MRPS24,MRPS15,MRPS34,MRPL38,MRPL11,AURKAIP1,CHCHD1,MRPS16,MRPL52,MRPL2,MRPS18A,MRPL4,EIF5A
GO: Biological Process	GO:0043241	protein complex disassembly		1.855e-08	0.0001053	1.755e-05	0.0001619	29	267	MAP1A,MAP1B,MRPL12,MRPS12,MRPL37,TMOD2,ADD1,APC,PPP1CA,MRPL17,MRPL14,MRPS26,MRPS24,MRPS15,MRPS34,SMARCD2,MRPL38,MRPL11,SETX,SYNJ1,AURKAIP1,CHCHD1,MRPS16,MRPL52,MRPL2,MRPS18A,MRPL4,EIF5A,IRAK3
GO: Biological Process	GO:0043624	cellular protein complex disassembly		3.883e-08	0.0002204	3.148e-05	0.0002903	25	213	MAP1A,MAP1B,MRPL12,MRPS12,MRPL37,TMOD2,ADD1,APC,MRPL17,MRPL14,MRPS26,MRPS24,MRPS15,MRPS34,MRPL38,MRPL11,SYNJ1,AURKAIP1,CHCHD1,MRPS16,MRPL52,MRPL2,MRPS18A,MRPL4,EIF5A
GO: Biological Process	GO:0032984	macromolecular complex disassembly		4.545e-08	0.000258	3.225e-05	0.0002974	29	278	MAP1A,MAP1B,MRPL12,MRPS12,MRPL37,TMOD2,ADD1,APC,PPP1CA,MRPL17,MRPL14,MRPS26,MRPS24,MRPS15,MRPS34,SMARCD2,MRPL38,MRPL11,SETX,SYNJ1,AURKAIP1,CHCHD1,MRPS16,MRPL52,MRPL2,MRPS18A,MRPL4,EIF5A,IRAK3
GO: Biological Process	GO:0031346	positive regulation of cell projection organization		6.093e-08	0.0003458	3.843e-05	0.0003544	34	367	HGF,MAP1B,KIDINS220,NEGR1,MIF,QKI,CXCL12,CNR1,APC,DDX56,SHANK3,SCARF1,ARSB,DNM3,DIXDC1,RAPGEF2,FYN,SETX,DISC1,RAB8B,ZEB2,TTBK2,KAT2B,BMPR2,CEP120,NME1,NME2,GPM6A,NTRK3,NR3C1,P2RX7,PAFAH1B1,PAK3,MACF1
GO: Biological Process	GO:0051094	positive regulation of developmental process		8.24e-08	0.0004677	4.677e-05	0.0004313	80	1323	HGF,MAP1B,HIPK1,ETS1,MEF2A,MEF2C,ADD1,KIDINS220,ATXN1,NEGR1,PIK3R1,MIF,FGF2,CMKLR1,QKI,PREX1,CXCL12,CNR1,TSHZ3,HTR2A,APC,DDX56,SHANK3,SCARF1,ZBTB46,LRRN3,SLC8A1,ARSB,CSF1R,ASPA,LRRTM2,PPP1R16B,NCOA1,PRKCB,DIXDC1,RAPGEF2,FYN,CX3CR1,IL6ST,CYLD,ZHX3,SETX,ZBTB16,CYSLTR1,DISC1,ZEB2,STAT5B,JAK1,TTBK2,KAT2B,BMPR2,CEP120,SYNJ1,C3AR1,NME1,NME2,TAL1,NOTCH4,TCF4,ZEB1,TCF12,GPR21,NTRK3,DDR2,SPAG9,NR3C1,TEK,N…
GO: Cellular Component	GO:0098794	postsynapse		2.882e-08	1.865e-05	7.015e-06	4.946e-05	39	449	PDE4B,MAP1A,MAP1B,LRRK2,F2R,MEF2C,ADD1,UTRN,ANK2,ITGA8,NBEA,LRRC4C,SHANK3,PPP1CA,SLC8A1,SLC8A3,LRRTM2,DNM3,ATP1A2,FYN,PDZD2,GIPC1,KCTD12,DISC1,ITPR1,TMUB1,PJA2,BMPR2,KCNB1,SYT11,DLG2,CACNA1C,GPM6A,SYNE1,NR3C1,SSPN,ENTPD1,DGKI,DCLK1
GO: Cellular Component	GO:0019866	organelle inner membrane		3.19e-08	2.064e-05	7.015e-06	4.946e-05	45	564	TIMM17B,MRPL12,MRPS12,MRPL37,LRRK2,MDH2,ABCA9,ABCA8,TUFM,PHB,COX5A,UQCRC1,STOML2,COX6A1,COX6B1,ATP5J2,C14orf2,MRPL17,MRPL14,SLC25A39,MRPS26,MRPS24,SLC25A10,MRPS15,MRPS34,MRPL38,MTX1,MRPL11,TOR1AIP1,CYC1,ATP5G1,ROMO1,NDUFS6,NDUFS8,ITPR1,APEX2,AURKAIP1,CHCHD1,MRPS16,MRPL52,MRPL2,MRPS18A,MRPL4,P2RX7,ATAD3A
GO: Cellular Component	GO:0005743	mitochondrial inner membrane		3.253e-08	2.105e-05	7.015e-06	4.946e-05	42	507	TIMM17B,MRPL12,MRPS12,MRPL37,LRRK2,MDH2,ABCA9,ABCA8,TUFM,PHB,COX5A,UQCRC1,STOML2,COX6A1,COX6B1,ATP5J2,C14orf2,MRPL17,MRPL14,SLC25A39,MRPS26,MRPS24,SLC25A10,MRPS15,MRPS34,MRPL38,MTX1,MRPL11,CYC1,ATP5G1,ROMO1,NDUFS6,NDUFS8,APEX2,AURKAIP1,CHCHD1,MRPS16,MRPL52,MRPL2,MRPS18A,MRPL4,ATAD3A
GO: Cellular Component	GO:0031966	mitochondrial membrane		1.369e-07	8.86e-05	2.215e-05	0.0001562	50	694	TIMM17B,MRPL12,MRPS12,GIMAP5,MRPL37,LRRK2,MDH2,ABCA9,ABCA8,TUFM,PHB,COX5A,TOMM40,UQCRC1,STOML2,COX6A1,COX6B1,ATP5J2,C14orf2,MRPL17,SLC8A3,MRPL14,SLC25A39,MRPS26,MRPS24,SLC25A10,MRPS15,MRPS34,MRPL38,COASY,MTX1,MRPL11,CYC1,ATP5G1,ROMO1,VPS13C,NDUFS6,NDUFS8,APEX2,AURKAIP1,CHCHD1,NME1,NME2,TOMM6,MRPS16,MRPL52,MRPL2,MRPS18A,MRPL4,ATAD3A
GO: Cellular Component	GO:0005761	mitochondrial ribosome		2.315e-07	0.0001497	2.496e-05	0.000176	14	79	MRPL12,MRPS12,MRPL37,MRPL17,MRPS26,MRPS24,MRPS15,MRPL38,MRPL11,MRPS16,MRPL52,MRPL2,MRPS18A,MRPS2
GO: Cellular Component	GO:0000313	organellar ribosome		2.315e-07	0.0001497	2.496e-05	0.000176	14	79	MRPL12,MRPS12,MRPL37,MRPL17,MRPS26,MRPS24,MRPS15,MRPL38,MRPL11,MRPS16,MRPL52,MRPL2,MRPS18A,MRPS2
GO: Cellular Component	GO:0005740	mitochondrial envelope		3.391e-07	0.0002194	3.134e-05	0.000221	51	736	TIMM17B,MRPL12,MRPS12,GIMAP5,MRPL37,LRRK2,MDH2,ABCA9,ABCA8,TUFM,PHB,COX5A,TOMM40,UQCRC1,STOML2,COX6A1,COX6B1,ATP5J2,C14orf2,MRPL17,SLC8A3,MRPL14,SLC25A39,MRPS26,MRPS24,SLC25A10,MRPS15,MRPS34,MRPL38,COASY,MTX1,MRPL11,CYC1,ATP5G1,ROMO1,VPS13C,NDUFS6,NDUFS8,APEX2,AURKAIP1,CHCHD1,NME1,NME2,TOMM6,DTYMK,MRPS16,MRPL52,MRPL2,MRPS18A,MRPL4,ATAD3A
GO: Cellular Component	GO:0005739	mitochondrion		7.195e-07	0.0004655	5.819e-05	0.0004103	95	1769	TIMM17B,CCDC58,PDE2A,PNKP,TBRG4,MRPL12,MRPS12,GIMAP5,MRPL37,LRRK2,MDH2,COMTD1,ABCA9,ABCA8,TUFM,PHB,TXN,COX5A,TOMM40,UQCRC1,TMEM223,ABCD2,STOML2,HSPE1,PTGES2,TSHZ3,P2RY12,ADCK5,COX6A1,COX6B1,CLIC4,ATP5J2,C14orf2,VPS25,RPUSD1,MRPL17,SLC8A1,SLC8A3,ARSB,GIMAP8,MRPL14,SLC25A39,FLAD1,MRPS26,MRPS24,SLC25A10,MRPS15,DNM3,PUS1,MRPS34,MRPL38,COASY,MTX1,FYN,MRPL11,CYC1,ATP5G1,ROMO1,SPARC,VPS13C,DISC1,RAB8B,P…
GO: Cellular Component	GO:0098857	membrane microdomain		1.006e-06	0.0006507	6.507e-05	0.0004588	30	343	STX2,PDE2A,TRPC1,PECAM1,LRRK2,RFTN2,F2R,DLC1,CNR1,STOML2,ANGPT1,HTR2A,ANK2,P2RY12,CLIP3,SMPD2,ATP1A2,FYN,ITPR1,RFTN1,BMPR2,KCNA3,KCNA5,CACNA1C,TEK,CBL,S1PR1,PIKFYVE,TGFBR2,TLR4
GO: Cellular Component	GO:0045121	membrane raft		1.006e-06	0.0006507	6.507e-05	0.0004588	30	343	STX2,PDE2A,TRPC1,PECAM1,LRRK2,RFTN2,F2R,DLC1,CNR1,STOML2,ANGPT1,HTR2A,ANK2,P2RY12,CLIP3,SMPD2,ATP1A2,FYN,ITPR1,RFTN1,BMPR2,KCNA3,KCNA5,CACNA1C,TEK,CBL,S1PR1,PIKFYVE,TGFBR2,TLR4
Mouse Phenotype	MP:0001544	abnormal cardiovascular system physiology		7.317e-07	0.003142	0.002282	0.02041	97	1588	HGF,PNKP,ERG,RHOJ,PECAM1,RPS6KB2,LRRK2,ETS1,MRVI1,F2R,MEF2A,MEF2C,F13A1,HEG1,KIDINS220,PIK3CG,PKD2,FGF2,FHL1,UTRN,RECK,CXCL12,PMM2,FLI1,ROBO4,FLT4,SGIP1,ANGPT1,RASA3,APC,CLIC4,VPS25,SIRT7,PPIA,SLC8A1,ARSB,MRPS34,PRKCB,ATM,PRKG1,ATP1A2,MBD5,CX3CR1,IL6ST,GAB1,GIPC1,UBR1,SP4,CYSLTR1,SNRK,SSTR2,KLHL20,NDUFS6,ITPA,FGL2,PJA2,LYVE1,BMPR2,KCNA5,KCNAB1,P2RY14,MCAT,TAL1,TARBP2,JAM3,NOTCH4,FBXW11,CACNA1C,CA…
Mouse Phenotype	MP:0005017	decreased B cell number		1.063e-06	0.004565	0.002282	0.02041	40	463	ERG,BACH2,ETS1,TLR7,MFNG,PIK3R1,RASGRP3,ARHGEF6,CXCL12,FLI1,WIPF1,RASA3,DOCK10,PRKCB,ATM,FYN,IL6ST,CYLD,RASSF2,GIMAP1,GIT2,ELMO1,CD84,JAK1,LYVE1,APEX2,PLCL2,ZEB1,TCF12,SH2B3,ARID4A,SH2D3C,EBF1,NR3C1,REV3L,S1PR1,NLRP3,TGFBR2,TLR4,AKAP13
Mouse Phenotype	MP:0009339	decreased splenocyte number		3.293e-05	0.1414	0.03801	0.3399	8	34	APC,ATM,STAT5B,RFTN1,LYVE1,ZEB1,CD34,AKAP13
Mouse Phenotype	MP:0002128	abnormal blood circulation		3.541e-05	0.152	0.03801	0.3399	50	729	HGF,PNKP,ERG,RHOJ,RPS6KB2,ETS1,F2R,F13A1,HEG1,KIDINS220,PKD2,RECK,CXCL12,PMM2,FLI1,FLT4,RASA3,APC,VPS25,SLC8A1,ARSB,ATM,PRKG1,CX3CR1,IL6ST,GAB1,GIPC1,UBR1,FGL2,LYVE1,BMPR2,MCAT,JAM3,FBXW11,CACNA1C,ZEB1,LPAR4,ARID4A,NTRK3,NR3C1,RUNX1T1,TEK,S1PR1,ZFPM2,TGFBR2,TIE1,ENTPD1,TLR4,TMEM100,TNS1
Mouse Phenotype	MP:0003635	abnormal synaptic transmission		5.605e-05	0.2407	0.04321	0.3864	50	742	NR2F6,PDE4B,LRRK2,BACE1,TMOD2,MEF2A,MEF2C,KIDINS220,ATXN1,FGF14,UTRN,PREX1,ARHGEF6,CNR1,PPFIA2,ITGA8,ZNF521,NBEA,SHANK3,PPM1G,SLC8A3,CCDC88A,KCNT2,ASPA,PRKACB,DNM3,PRKG1,ATP1A2,FYN,IL6ST,SP4,ARRDC1,DISC1,SSTR2,PCDH17,ITPR1,KCNA5,SYNJ1,KCNAB1,DLG2,ST8SIA4,NOVA2,CACNA1C,CACNA2D1,NR3C1,ZDHHC17,ENTPD1,PAK3,RORA,PCDH9
Mouse Phenotype	MP:0003486	abnormal channel response intensity		6.816e-05	0.2927	0.04321	0.3864	4	7	KCNT2,IL6ST,KCNA5,CACNA2D1
Mouse Phenotype	MP:0000259	abnormal vascular development		7.045e-05	0.3025	0.04321	0.3864	40	552	ERG,RHOJ,ETS1,F2R,MEF2C,HEG1,DLC1,FGF2,QKI,RECK,CXCL12,FLI1,ROBO4,FLT4,ANGPT1,RASA3,VASH1,APC,CLIC4,SLC8A1,CCDC88A,RAPGEF2,GIPC1,DOCK4,UBR1,HM13,BMPR2,PTPRB,TAL1,NOTCH4,CACNA1C,REV3L,TEK,S1PR1,TGFBR2,TIE1,LMO2,TLR4,RORA,TMEM100
Domain	PS51720	G_AIG1	PROSITE	3.329e-08	9.27e-05	3.09e-05	0.000263	6	8	GIMAP4,GIMAP5,GIMAP6,GIMAP8,GIMAP1,GIMAP7
Domain	PF04548	AIG1	Pfam	3.329e-08	9.27e-05	3.09e-05	0.000263	6	8	GIMAP4,GIMAP5,GIMAP6,GIMAP8,GIMAP1,GIMAP7
Domain	IPR006703	G_AIG1	InterPro	3.329e-08	9.27e-05	3.09e-05	0.000263	6	8	GIMAP4,GIMAP5,GIMAP6,GIMAP8,GIMAP1,GIMAP7
Domain	PS50003	PH_DOMAIN	PROSITE	2.055e-05	0.05724	0.01092	0.09294	24	280	DOK6,OSBPL8,PLCL1,ARHGAP20,PREX1,ARHGEF6,RASA3,DOCK10,PREX2,DNM3,GAB3,GAB1,ARHGAP24,DOCK11,ELMO1,PLCL2,ARHGAP25,AKT3,SH2B3,RASGRF2,ADRM1,ROCK1,AKAP13,PLEKHM3
Domain	IPR008936	Rho_GTPase_activation_prot	InterPro	3.105e-05	0.08649	0.01092	0.09294	12	88	DLC1,ARHGAP31,PIK3R1,ARHGAP20,RASA3,PLXNA4,ARHGAP24,STARD8,TAGAP,MYO9A,ARHGAP25,PLXNC1
Domain	PS50009	RASGEF_CAT	PROSITE	3.404e-05	0.09479	0.01092	0.09294	7	29	RASGRP4,RASGRP3,RAPGEF2,RGL1,RASGRF2,SH2D3C,RASGRP2
Domain	1.10.840.10	-	Gene3D	4.314e-05	0.1201	0.01092	0.09294	7	30	RASGRP4,RASGRP3,RAPGEF2,RGL1,RASGRF2,SH2D3C,RASGRP2
Domain	IPR001895	RASGEF_cat_dom	InterPro	4.314e-05	0.1201	0.01092	0.09294	7	30	RASGRP4,RASGRP3,RAPGEF2,RGL1,RASGRF2,SH2D3C,RASGRP2
Domain	SM00147	RasGEF	SMART	4.314e-05	0.1201	0.01092	0.09294	7	30	RASGRP4,RASGRP3,RAPGEF2,RGL1,RASGRF2,SH2D3C,RASGRP2
Domain	PF00617	RasGEF	Pfam	4.314e-05	0.1201	0.01092	0.09294	7	30	RASGRP4,RASGRP3,RAPGEF2,RGL1,RASGRF2,SH2D3C,RASGRP2
Pathway	1268844	Mitochondrial translation elongation	BioSystems: REACTOME	6.099e-12	1.169e-08	1.169e-08	9.507e-08	20	89	MRPL12,MRPS12,MRPL37,TUFM,MRPL17,MRPL14,MRPS26,MRPS24,MRPS15,MRPS34,MRPL38,MRPL11,AURKAIP1,CHCHD1,MRPS16,MRPL52,MRPL2,MRPS18A,MRPL4,MRPS2
Pathway	1268842	Mitochondrial translation	BioSystems: REACTOME	2.197e-11	4.21e-08	2.105e-08	1.712e-07	20	95	MRPL12,MRPS12,MRPL37,TUFM,MRPL17,MRPL14,MRPS26,MRPS24,MRPS15,MRPS34,MRPL38,MRPL11,AURKAIP1,CHCHD1,MRPS16,MRPL52,MRPL2,MRPS18A,MRPL4,MRPS2
Pathway	1268845	Mitochondrial translation termination	BioSystems: REACTOME	4.394e-11	8.418e-08	2.105e-08	1.712e-07	19	88	MRPL12,MRPS12,MRPL37,MRPL17,MRPL14,MRPS26,MRPS24,MRPS15,MRPS34,MRPL38,MRPL11,AURKAIP1,CHCHD1,MRPS16,MRPL52,MRPL2,MRPS18A,MRPL4,MRPS2
Pathway	1268843	Mitochondrial translation initiation	BioSystems: REACTOME	4.394e-11	8.418e-08	2.105e-08	1.712e-07	19	88	MRPL12,MRPS12,MRPL37,MRPL17,MRPL14,MRPS26,MRPS24,MRPS15,MRPS34,MRPL38,MRPL11,AURKAIP1,CHCHD1,MRPS16,MRPL52,MRPL2,MRPS18A,MRPL4,MRPS2
Pathway	1269340	Hemostasis	BioSystems: REACTOME	3.817e-07	0.0007314	0.0001463	0.00119	46	640	HGF,PDE2A,PDE1B,PECAM1,GNG2,MRVI1,F2R,F8,F13A1,JAM2,PIK3CG,PIK3R1,MIF,ANGPT1,P2RY12,DOCK10,PPIA,MMRN1,SLC8A1,SLC8A3,PRKACB,PRKCB,PRKG1,ATP1B2,FYN,DOCK4,SPARC,DOCK11,ITPR1,CD84,JAK1,JAM3,KIF22,DOCK2,AKT3,SH2B3,TEK,JMJD1C,ZFPM2,GUCY1A2,P2RX7,GUCY1A3,GUCY1B3,DGKI,GNB4,RASGRP2
Pathway	1269343	Nitric oxide stimulates guanylate cyclase	BioSystems: REACTOME	5.654e-07	0.001083	0.0001806	0.001469	8	24	PDE2A,PDE1B,MRVI1,PRKG1,ITPR1,GUCY1A2,GUCY1A3,GUCY1B3
Pathway	1269341	Platelet homeostasis	BioSystems: REACTOME	1.372e-06	0.002628	0.0003574	0.002908	14	91	PDE2A,PDE1B,PECAM1,GNG2,MRVI1,SLC8A1,SLC8A3,PRKG1,ITPR1,GUCY1A2,P2RX7,GUCY1A3,GUCY1B3,GNB4
Pathway	868085	Ras signaling pathway	BioSystems: KEGG	1.492e-06	0.002859	0.0003574	0.002908	23	227	HGF,RASGRP4,GNG2,ETS1,PIK3R1,RASGRP3,FGF2,FGF14,FLT4,ANGPT1,RASA3,CSF1R,PRKACB,PRKCB,GAB1,RGL1,AKT3,RASGRF2,TEK,EFNA4,PAK3,GNB4,RASGRP2
Pathway	983748	cGMP-PKG signaling pathway	BioSystems: KEGG	6.274e-06	0.01202	0.001336	0.01087	18	163	PDE2A,MRVI1,MEF2A,MEF2C,PIK3CG,PPP1CA,SLC8A1,SLC8A3,PRKG1,ATP1A2,ATP1B2,ITPR1,CACNA1C,AKT3,GUCY1A2,GUCY1A3,GUCY1B3,ROCK1
Pathway	1268838	Organelle biogenesis and maintenance	BioSystems: REACTOME	7.204e-06	0.0138	0.00138	0.01123	28	341	MRPL12,MRPS12,MRPL37,MEF2C,TUBG1,TUFM,PKD2,CHD9,MRPL17,MRPL14,MRPS26,MRPS24,SSNA1,MRPS15,MRPS34,NCOA1,MRPL38,MRPL11,TTBK2,AURKAIP1,CHCHD1,MRPS16,MRPL52,MRPL2,MRPS18A,MRPL4,MRPS2,PAFAH1B1
Pubmed	20877624	Genetic variants in nuclear-encoded mitochondrial genes influence AIDS progression.	Pubmed	1.741e-25	6.338e-21	6.338e-21	7.023e-20	59	926	CCDC58,TBRG4,MRPL12,MRPS12,NIPSNAP3B,MRPL37,MDH2,COMTD1,ABCA9,TUFM,PHB,TXN,COX5A,TOMM40,UQCRC1,TMEM223,ABCD2,STOML2,HSPE1,PTGES2,TSHZ3,ADCK5,COX6A1,COX6B1,CLIC4,ATP5J2,MRPL17,MRPL14,SLC25A39,MRPS26,MRPS24,SLC25A10,MRPS15,MRPS34,MTX1,CYC1,ATP5G1,ROMO1,RAB8B,NDUFS6,NDUFS8,SARS2,C20orf24,MCAT,AURKAIP1,CHCHD1,NME1,TOP1MT,NME2,PRSS35,MRPS16,MRPL52,CCDC51,MRPL2,MRPS18A,MRPL4,ATAD3A,MRPS2,FAM136A
Pubmed	21145461	Dynamics of cullin-RING ubiquitin ligase network revealed by systematic quantitative proteomics.	Pubmed	5.863e-25	2.135e-20	1.067e-20	1.183e-19	79	1698	POP7,MAP1B,MRPL12,BACH2,MRPL37,ZNF699,MDH2,TUFM,PHB,TXN,PIK3R1,AHCY,WDR77,LRCH2,NOP16,PSMG3,POLR1C,DDX56,NHP2,PPIA,SLA,FAM83H,PPP1CA,RALY,ZBTB46,PPP4C,MRPL14,MRPS26,MRPS15,MRPS34,SMARCD2,EIF3I,ATP1A2,SNRPA,SNRPB,SNRPC,SNRPD2,MRPL11,SNRPF,MTMR9,KCTD12,UBR1,PSMA5,PSMB3,PSMB4,EXOSC5,RUVBL2,EIF6,KLHL20,CD84,PJA2,TTBK2,SARS2,ANKRD12,AURKAIP1,EBNA1BP2,PYCR3,TARBP2,FBXW11,KLHL4,KPNA5,CACNA1C,TUBA1C,MRPS…
[truncated: 83 more rows]

## Sheet: Supplementary Table 9
Category	ID	Name	Source	p-value	q-value Bonferroni	q-value FDR B&H	q-value FDR B&Y	Hit Count in Query List	Hit Count in Genome	Hit in Query List
GO: Molecular Function	GO:0008188	neuropeptide receptor activity		1.005e-05	0.002714	0.001462	0.009033	4	46	PROKR1,NPBWR2,PRLHR,OPRM1
[truncated: 147 more rows]

## Sheet: Supplementary Table 10
Category	ID	Name	Source	p-value	q-value Bonferroni	q-value FDR B&H	q-value FDR B&Y	Hit Count in Query List	Hit Count in Genome	Hit in Query List
[truncated: 115 more rows]

[truncated: 20 more sheets: Supplementary Table 11, Supplementary Table 12, Supplementary Table 13, Supplementary Table 14, Supplementary Table 15, Supplementary Table 16, Supplementary Table 17, Supplementary Table 18, Supplementary Table 19, Supplementary Table 20, Supplementary Table 21, Supplementary Table 22, Supplementary Table 23, Supplementary Table 24, Supplementary Table 25, Supplementary Table 26, Supplementary Table 27, Supplementary Table 28, Supplementary Table 29, Supplementary Table 30]
